# Supplementary material for: Communicating conservation: how do the Nepalese print media portray caterpillar fungus? An analysis of newspaper coverage from 2008–2021
Source: PubMed Central journal article supplement — Heliyon. 2022 Aug 27;8(9):e10439. doi: 10.1016/j.heliyon.2022.e10439 (PMC9437801; doi:10.1016/j.heliyon.2022.e10439), 2022-08-27
Supplement: mmc2.pdf [file mmc2.pdf]

**Supplementary Material B**

| <b>Year/Newspaper</b> | 2008      | 2009      | 2010      | 2011      | 2012      | 2013      | 2014      | 2015      | 2016      | 2017      | 2018      | 2019      | 2020      | 2021      |
|-----------------------|-----------|-----------|-----------|-----------|-----------|-----------|-----------|-----------|-----------|-----------|-----------|-----------|-----------|-----------|
| Annapurna             | 10        | 5         | 2         | 4         | 5         | 4         | 6         | 6         | 4         | 11        | 8         | 15        | 6         | 2         |
| Kantipur              | 22        | 7         | 2         | 14        | 24        | 17        | 33        | 27        | 10        | 13        | 18        | 18        | 3         | 5         |
| Karobar               | 0         | 0         | 2         | 4         | 2         | 1         | 13        | 8         | 4         | 4         | 3         | 5         | 8         | 5         |
| Nagarik               | 0         | 3         | 4         | 5         | 4         | 8         | 17        | 7         | 9         | 3         | 3         | 10        | 2         | 8         |
| Nayapatrika           | 5         | 2         | 4         | 3         | 8         | 3         | 2         | 6         | 5         | 10        | 5         | 17        | 4         | 12        |
| Rajdhani              | 7         | 7         | 4         | 11        | 5         | 5         | 6         | 3         | 7         | 2         | 12        | 5         | 1         | 4         |
| Gorkhapatra           | 4         | 4         | 5         | 5         | 3         | 8         | 5         | 3         | 6         | 5         | 11        | 7         | 3         | 4         |
| <b>Grand Total</b>    | <b>48</b> | <b>28</b> | <b>23</b> | <b>46</b> | <b>51</b> | <b>46</b> | <b>82</b> | <b>60</b> | <b>45</b> | <b>48</b> | <b>60</b> | <b>77</b> | <b>27</b> | <b>40</b> |

| News paper | News Title                                     | Year | Reporter                        | District             |
|------------|------------------------------------------------|------|---------------------------------|----------------------|
| Annapurna  | विद्यार्थी हिमाल तिर विद्यालय बन्द             | 2008 | राजेन्द्र श्रेष्ठ दिनेश श्रेष्ठ | Baitadi and Jajarkot |
| Annapurna  | यासांगुम्बा टिप्न ४० हजार जना सङ्गालमा         | 2008 | जगदीस रोकाया                    | Bajhang              |
| Annapurna  | यासांगुम्बा टिप्नेसँगै ठेकेदारको ताँती         | 2008 | अस                              | Kaski                |
| Annapurna  | यासांगुम्बा सहित पाँच पक्राउ                   | 2008 | अस                              | Nepalgunj            |
| Annapurna  | यासांगुम्बा संकलन गर्न सुरु                    | 2008 | किशोर बुढाथोकी                  | Sankhuwasabha        |
| Annapurna  | यासांगुम्बा बरामद                              | 2008 | अन्नपूर्ण सम्बाददाता            | Sankhuwasabha        |
| Annapurna  | जडिबुटीको अवैध निकासी बढ्यो                    | 2008 | अन्नपूर्ण सम्बाददाता            | Sankhuwasabha        |
| Annapurna  | जडिबुटीको सोभै बाहिरिदाँ देशलाई घाटा           | 2008 | किशोर बुढाथोकी                  | Sankhuwasabha        |
| Annapurna  | हिमपात हुँदा यासांगुम्बा संकलक अलपत्र          | 2008 | किशोर बुढाथोकी                  | Sankhuwasabha        |
| Annapurna  | यासांगुम्बा गुणस्तर परिक्षण                    | 2008 | अन्नपूर्ण सम्बाददाता            | Sankhuwasabha        |
| Annapurna  | यासांगुम्बा टिप्न स्कुल बन्द                   | 2009 | जगदीस रोकाया                    | Bajhang              |
| Annapurna  | यासांगुम्बा टिप्ने वालवालीका बढे               | 2009 | अस                              | Bajhang              |
| Annapurna  | यासांगुम्बाबाट ८७ लाख राजश्व संकलन             | 2009 | रासस                            | Darchula             |
| Annapurna  | यासांगुम्बा टिप्न स्कुल र स्वास्थ्य चौकी बन्द  | 2009 | अस                              | Mugu                 |
| Annapurna  | हिमपातले यासांगुम्बा संकलन रोकियो              | 2009 | अस                              | Sankhuwasabha        |
| Annapurna  | यासांगुम्बा विक्रि भएन                         | 2010 | जगदीस रोकाया                    | Bajhang              |
| Annapurna  | यासांगुम्बा संकलन अस्तव्यस्त                   | 2010 | शिव अप्रिय                      | Gorkha               |
| Annapurna  | यासांगुम्बा खोन्न गएका ६ जनाको मृत्यु          | 2011 | जगदिश रोकाया                    | Bajhang              |
| Annapurna  | यासांगुम्बा संकलनकर्ता र प्रहरीबीच झडप         | 2011 | जिवन सेजुवाल                    | Mugu                 |
| Annapurna  | हराएको पैसा खोज्ने होड र यार्चाकुम्भु महाकुम्भ | 2012 | जिवन सेजुवाल                    | Mugu                 |
| Annapurna  | यासांगुम्बा टिपेर फर्केका युवामार्थि आक्रमण    | 2012 | समाचारदाता                      | Rukum                |
| Annapurna  | यासांगुम्बा टिप्न गएका सात बेपत्ता             | 2013 | शिवराज भट्ट                     | Bajhang Dhangadhi    |
| Annapurna  | यासांगुम्बा संकलन गर्ने क्रममा तीनको मृत्यु    | 2013 | संवाददाता                       | Jumla                |
| Annapurna  | यासांगुम्बा यात्रा                             | 2013 | कमल मादेन                       | Rukum                |
| Annapurna  | यासांगुम्बा संकलनकर्ताले पाटन क्षेत्र भरिभराउ  | 2014 | जिवन सेजुवाल                    | Mugu                 |

|           |                                                    |      |                       |                  |
|-----------|----------------------------------------------------|------|-----------------------|------------------|
| Annapurna | बालबालिकाका यासा दुःख, लेक लागेर चारको मृत्यु      | 2014 | जिवन सेजुवाल          | Mugu             |
| Annapurna | बढ्यो नक्कली यासाको कारोबार                        | 2014 | छेटु शोर्पा           | Sankhuwasabha    |
| Annapurna | यासागुम्बा टिप्न विधालय बन्द                       | 2011 | अन्नपूर्ण सम्बाददाता  | Bajhang          |
| Annapurna | यासागुम्बा टिप्न गएका तीन विधार्थी मरे             | 2011 | अन्नपूर्ण सम्बाददाता  | Jajarkot         |
| Annapurna | यासागुम्बाको मूल्य प्रति किलो २० लाख               | 2012 | जगदिश रोकाया          | Bajhang          |
| Annapurna | यासागुम्बा बेचेर विजुली                            | 2012 | रामजी राना            | Lamjung          |
| Annapurna | विधार्थी यासा टिप्न, विधालय बन्द                   | 2012 | सम्बाददाता आदर्श केसी | Rukum            |
| Annapurna | यासागुम्बा टिप्न बुकि लेकमा हजारौको लर्को          | 2013 | आदर्श केसी            | Rukum            |
| Annapurna | यासागुम्बाको कमाइले जीवनस्तर परिवर्तन              | 2014 | शिवप्रसाद उप्रेती     | Gorkha           |
| Annapurna | यासा खोज्न गएका ऋण बोकेर फर्कदै                    | 2014 | जिवन सेजुवाल          | Mugu             |
| Annapurna | भारतको रोजगारीभन्दा यासागुम्बावाटै राम्रो कमाइ     | 2014 | आदर्श केसी            | Rukum            |
| Annapurna | यासाले फेयो विपन्नको दिन                           | 2015 | जगदिश रोकाया          | Bajhang          |
| Annapurna | यासाले टिपेर फर्केका चारजना सेतीमा वेपत्ता         | 2015 | संवाददाता             | Bajhang          |
| Annapurna | आठ किलो यासागुम्बा र पाँचलाख वरामद                 | 2015 | रवि धामी              | Kathmandu        |
| Annapurna | स्कूल बन्द गरेर यासा टिप्न लेकतिर                  | 2015 | जिवन सेजुवाल          | Mugu             |
| Annapurna | यासा संकलन गर्ने कम र यासा टिप्न गएका तीनको मृत्यु | 2015 | जिवन सेजुवाल          | Mugu and Surkhet |
| Annapurna | यासा खोज्न गएका दुइको मृत्यु                       | 2015 | संवाददाता             | Sankhuwasabha    |
| Annapurna | यासा नभेटीएपछि रिता                                | 2016 | दिपक अधिकारी          | Manang           |
| Annapurna | यासा उत्पादनमा हास                                 | 2016 | संवाददाता             | Bajhang          |
| Annapurna | यासा संकलकबाट ७६ लाख राजश्व                        | 2016 | जीवन सेजुवाल          | Mugu             |
| Annapurna | रुकुममा यासा महोत्सव                               | 2016 | रासस                  | Rukum            |
| Annapurna | यासा टिप्न गएपछि गाउँ सुनशान                       | 2017 | भगिरथ अवस्थी फोटो     | Baitadi          |
| Annapurna | विद्यार्थीहरु यासा टिप्न गए शिक्षक म्यादी प्रहरीमा | 2017 | जगदीश रोकाया          | Bajhang          |
| Annapurna | यासा संकलनमा हजारौ र यासा संकलनमा जाने घटे         | 2017 | सुन्दर सिङ्ग धामी     | Darchula         |

|           |                                        |      |                   |                  |
|-----------|----------------------------------------|------|-------------------|------------------|
| Annapurna | यासा संकलन अनुमति पत्र वितरण सुरु      | 2017 | संवाददाता         | Darchula         |
| Annapurna | चुनाब छाडेर यासा टिप्न                 | 2017 | शिव उप्रेती       | Gorkha           |
| Annapurna | यासागुम्बा चोरेपछि पाँचा जना पक्राउ    | 2017 | अस                | Gorkha           |
| Annapurna | मतदान छाडेर यासा टिप्न पाटन तिर        | 2017 | गोबिन्द देवकोटा   | Jumla            |
| Annapurna | यासा जिन्दगी                           | 2017 | देबु लुइँटेल फिचर | Kathmandu, Nepal |
| Annapurna | मनाङ्गका खर्कहरुमा यासा टिप्नेको भिड   | 2017 | दिपक अधिकारी      | Manang           |
| Annapurna | यासा टिप्न जेठ २० गते बाट अनुमति       | 2017 | रिपोर्टर          | Mugu             |
| Annapurna | यासा टिप्न गएका बेपत्ता                | 2017 | संवाददाता         | Mugu             |
| Annapurna | यासा टिप्न लेकतिर विद्यार्थी           | 2018 | जगदीश रोकाया      | Bajhang          |
| Annapurna | यासा टिप्न लाकेतिर विद्यार्थी          | 2018 | जगदीश रोकाया      | Bajhang          |
| Annapurna | यासा गुम्बा चोर्न खोज्ने पक्राउ        | 2018 | समाचारदाता        | Dolpa            |
| Annapurna | यासा चोर्ने ४९ जना पक्राउ              | 2018 | समाचारदाता        | Dolpa            |
| Annapurna | यासा टिप्न गएको घाटी रेटेर हत्या       | 2018 | टेक बहादुर शाही   | Dolpa            |
| Annapurna | यासा खुल्दा गाउँ सुनसान                | 2018 | नन्दराम जैशी      | Jumla            |
| Annapurna | यासा संकलन जेठ पहिलो साता देखी         | 2018 | जीवन सेजुवाल      | Mugu             |
| Annapurna | घरमा टाला ठोकेर पाटनतिर                | 2018 | टेक बहादुर शाही   | Sankhuwasabha    |
| Annapurna | विद्यार्थी यासा टिप्न गएपछि स्कुल बन्द | 2019 | जगदीश रोकाया      | Bajhang          |
| Annapurna | दौडन सके पो यासा                       | 2019 | टेक बहादुर शाही   | Dolpa            |
| Annapurna | यासा टिप्न लेकतिर                      | 2019 | शिव उप्रेती       | Gorkha           |
| Annapurna | पढाई भन्दा प्यारो यासा                 | 2019 | राजेन्द्र कार्की  | Jajarkot         |
| Annapurna | दुधे बालक छोडेर यासा टिप्न             | 2019 | नन्दराम जैशी      | Jumla            |
| Annapurna | यासा टिप्न आचार संहिता                 | 2019 | नविनराज कुइँकैल   | Lamjung          |
| Annapurna | यासा टिप्न समय संग                     | 2019 | जीवन सेजुवाल      | Mugu             |
| Annapurna | यासा सुरक्षामा जुटे युवा               | 2019 | महेश के.सी        | Rukum (East)     |

|             |                                          |      |                            |                           |
|-------------|------------------------------------------|------|----------------------------|---------------------------|
| Annapurna   | यासाँ संकलन र छुट पुर्जीमा रोक           | 2020 | टेक बहादुर शाही            | Dolpa                     |
| Annapurna   | यासाँ पाटनको सुरक्षामा प्रहरी            | 2020 | टेक बहादुर शाही            | Dolpa                     |
| Annapurna   | यासाँ संकलनमा रोक                        | 2020 | टेक बहादुर शाही/ नविन      | Dolpa and Lamjung         |
| Annapurna   | स्कूल र यासाँ संकलन खुला गर्न सिफारिस    | 2020 | ललितबहादुर बुढा            | Surkhet                   |
| Annapurna   | पाटनमै बिलायो हिमाली हिरा                | 2020 | ललितबहादुर बुढा/ राजेन्द्र | Surkhet/Jajarkot/Dolpa/Mi |
| Annapurna   | सुन भन्दा बहुमुल्य नेपालको याचा          | 2021 | डा. सुमन कुमार रेग्मी      | Kathmandu                 |
| Annapurna   | यासाँ टिप्न गएका युवा मृत फेला           | 2021 | समाचारदाता                 | Mustang                   |
| Annapurna   | जेठ १५ देखि यासाँ टिप्न बाटो खुल्ने      | 2019 | जगदीश रोकया                | Bajhang                   |
| Annapurna   | विद्यालाय बन्द गरेर यासाँ संकलनमा        | 2019 | सुन्दरसिंह धामी            | Darchula                  |
| Annapurna   | यासाँ टिप्ने सिजन संगै बाटो निर्माण      | 2019 | जीवन सेजुवाल               | Mugu                      |
| Annapurna   | सबै यासाँगुम्बा टिप्न गाउँ रिउँ,         | 2019 | रबि धामी                   | Kanchanpur                |
| Annapurna   | यासाँगुम्बाको सदुपयोग                    | 2019 | सम्पादकीय                  | Kathmandu                 |
| Annapurna   | यासाँ चोरि रोकन गस्ती                    | 2019 | डोल्पा                     | Kathmandu                 |
| Annapurna   | ताप्लेजुङ्गमा पनि फेला पर्यो यासाँगुम्बा | 2019 | सिता निरौला                | Taplejung                 |
| Annapurna   | यासाँ संकलनमा रोक                        | 2020 | टेक बहादुर शाही/ नविन      | Dolpa                     |
| Gorkhapatra | यासाँ निकासीका लागि तीन दिन नाका खुला    | 2008 | समाचारदाता                 | Sankhuwasabha             |
| Gorkhapatra | यासाँ व्यापारी लुटिए                     | 2010 | सम्वाददाता                 | Bajhang                   |
| Gorkhapatra | यासाँगुम्बाको उत्पादन राजधानी मै संभव    | 2010 | प्रकृति अधिकारी            | Kathmandu                 |
| Gorkhapatra | यासाँ टिप्न गएका छ जनाको ज्यान गयो       | 2011 | सम्वाददाता                 | Bajhang                   |
| Gorkhapatra | यासाँ टिप्न गाँउ नै उल्टियो              | 2011 | रासस                       | Kalikot                   |

|             |                                                           |      |                    |                  |
|-------------|-----------------------------------------------------------|------|--------------------|------------------|
| Gorkhapatra | यासागुम्बा टिप्न विद्यार्थीहरु लेकतिर                     | 2011 | लीवांग             | Rolpa            |
| Gorkhapatra | यासागुम्बाको मौसम विद्यार्थीहरु लेकतिर, विद्यालय वन्द     | 2011 | सम्बाददाता         | Rukum            |
| Gorkhapatra | यासागुम्बा संकलन शुरु                                     | 2011 | सम्बाददाता         | Sankhuwasabha    |
| Gorkhapatra | यासाको आमदानीले उक्सीयो जीवनस्तर                          | 2013 | संवाददाता          | Baglung          |
| Gorkhapatra | यासागुम्बा संकलनकर्ताबाट भन्डै तीन करोड प्रवेशशुल्क उठ्यो | 2013 | रासस               | Jajarkot         |
| Gorkhapatra | नक्कली यासा बजारमा आएपछि                                  | 2013 | संवाददाता          | Sankhuwasabha    |
| Gorkhapatra | यासा टिप्न जाँदा लडेर नौ जनाको मृत्यु                     | 2014 | संवाददाता          | Darchula         |
| Gorkhapatra | यासाको संकलनमा बढ्न थाल्यो तस्करी                         | 2014 |                    | Kathmandu        |
| Gorkhapatra | यासाको सिजन शुरु भएपछि गाउँघर सुनसान                      | 2014 | संवाददाता          | Mugu             |
| Gorkhapatra | अवैध यासा सहित पक्राउ                                     | 2014 | संवाददाता          | Nepalgunj        |
| Gorkhapatra | यासा टिप्न जंगलमै बास                                     | 2014 | संवाददाता          | Taplejung        |
| Gorkhapatra | यासा टिप्ने सुरमा धानखेती छोड्दै                          | 2015 | अधिकारी            | Jumla            |
| Gorkhapatra | यासा गुम्बा लोप थाले हेन्सा                               | 2015 | संवाददाता          | Kathmandu        |
| Gorkhapatra | यासागुम्बा ओसारपसारमा निकुन्जको कडाइ                      | 2015 | संवाददाता          | Sankhuwasabha    |
| Gorkhapatra | महँगो यासागुम्बा                                          | 2016 | शम्भु प्रसाई फिचर  | Kathmandu        |
| Gorkhapatra | यासागुम्बा संकलनकालागि प्रवेश दिदै                        | 2016 | संवाददाता          | Mugu             |
| Gorkhapatra | यासा बाट आठ दिनमा उठियो रु ७५ लाख स्थानीय कर              | 2016 | संवाददाता          | Mugu             |
| Gorkhapatra | यासा संकलन सुरु                                           | 2016 | रासस फोटो          | Rukum            |
| Gorkhapatra | यासा संकलन खुला गरिदै                                     | 2016 | रासस               | Rukum            |
| Gorkhapatra | यासा महोस्तव                                              | 2016 | सुर्बिन्द पुन मगर  | Rukum            |
| Gorkhapatra | यासा उत्पादन बर्षेनी घट्दै                                | 2017 | शैलेन्द्र रोकाया   | Bajhang          |
| Gorkhapatra | दार्चुलामा यासा संकलन अनुमतिपत्र वितरण सुरु               | 2017 | रासस               | Darchula         |
| Gorkhapatra | यासा आकर्षण                                               | 2017 | रासस फोटो          | Dolpa            |
| Gorkhapatra | विद्यार्थी यासा टिप्न लेकतिर परिक्षा तालिका नै प्रभावित   | 2017 | संवाददाता          | Jumla            |
| Gorkhapatra | मनाङ्ग लेकमा यासा खोज्नेको भिड                            | 2017 | नाबिन्द्राज कुइकेल | Manang (Lamjung) |

|             |                                                                 |      |                        |           |
|-------------|-----------------------------------------------------------------|------|------------------------|-----------|
| Gorkhapatra | यासा टिप्न विद्यार्थी लेक तिर सात हजार विद्यार्थी विद्यालय बहिर | 2018 | शैलेन्द्र रोकाया       | Bajhang   |
| Gorkhapatra | यासा टिप्न झोलामा कापी किताब                                    | 2018 | समाचारदाता             | Bajhang   |
| Gorkhapatra | यासा सङ्कलन पुनः सुरु                                           | 2018 | शैलेन्द्र रोकाया       | Bajhang   |
| Gorkhapatra | यासा बिक्री नहुदा आर्थिक मण्दी                                  | 2018 | शैलेन्द्र रोकाया       | Bajhang   |
| Gorkhapatra | अद्यनका लागि यासागुम्बु                                         | 2018 | दमक समाचारदाता         | Damak     |
| Gorkhapatra | यासा गुम्बा बिक्री नहुदा लाखौ घाटा                              | 2018 | लोकेन्द्र प्रसाद जोशी  | Darchula  |
| Gorkhapatra | यासाको लागि यात्रा                                              | 2018 | प्रकृति अधिकारी        | Dolpa     |
| Gorkhapatra | यासाको भाउ बढ्यो                                                | 2018 | समाचारदाता             | Dolpa     |
| Gorkhapatra | यासागुम्बामा पैसा                                               | 2018 | डा. सुमन कुमार रेग्मी  | Kathmandu |
| Gorkhapatra | जेठ ५ बटा यासा टिप्न प्रवेश खुल्ला                              | 2018 | नृपेन्द्र बहादुर मल्ल  | Mugu      |
| Gorkhapatra | यासा टिप्न गएका रिक्तै फर्किए                                   | 2018 | सुरेन्द्र खत्री        | Rukum     |
| Gorkhapatra | यासा टिप्नेलाई १० लाख दुर्घटना बिमा                             | 2019 | लोकेन्द्र प्रसाद जोशी  | Darchula  |
| Gorkhapatra | यासागुम्बा टिप्न नागरिकता आनिवार्य                              | 2019 | दार्चुला समाचारदाता    | Darchula  |
| Gorkhapatra | यासागुम्बा संकलन गर्न स्थाई ठेगाना खुल्लुपर्ने                  | 2019 | राष्ट्रिय समाचार समिति | Jajarkot  |
| Gorkhapatra | यासा सङ्कलन क्षेत्रमा प्रतिबन्ध                                 | 2019 | समाचारदाता             | Jajarkot  |
| Gorkhapatra | कुहिने भयो यासा                                                 | 2019 | राजन रावत              | Kathmandu |
| Gorkhapatra | यासागुम्बा संकलनको चटारो                                        | 2019 | बेलिन थापा             | Lamjung   |
| Gorkhapatra | जेठ १५ देखि यासा टिप्न बाटो खुल्ने                              | 2019 | नयपयेंद्र मल्ल         | Mugu      |
| Gorkhapatra | यासागुम्बा टिप्न पाउनुपर्ने माग                                 | 2020 | दार्चुला समाचारदाता    | Darchula  |

|             |                                                               |      |                            |               |
|-------------|---------------------------------------------------------------|------|----------------------------|---------------|
| Gorkhapatra | कोरोना विरुद्ध संक्रमणको असर<br>यासा उम्रिन सकस, टिप्न बन्देज | 2020 | कर्णाली प्रदेश             | Surkhet       |
| Gorkhapatra | यासा टिप्न जाने विद्यार्थीलाई<br>पाटनमै पढाई                  | 2020 | शेशकान्त पण्डित            | Surkhet       |
| Gorkhapatra | हामिलाइ कहिले पो जोखिम छै र ?                                 | 2021 | बसन्त प्रताप सिंह          | Bajhang       |
| Gorkhapatra | यासा व्यवस्थापन निर्देशिका बन्दै                              | 2021 | समाचारदाता                 | Bajhang       |
| Gorkhapatra | कोरोनाको जोखिम बिच यार्चा<br>संकलन                            | 2021 | हरि गौतम                   | Rukum (West)  |
| Gorkhapatra | यार्चाको खोजी                                                 | 2021 | अनिश तिवारी                | Sindhupalchok |
| Gorkhapatra | यासा टिप्न ४० हजार मानिस<br>सङ्ग्रहलतीर                       | 2008 | जगदिश रोकाया               | Bajhang       |
| Gorkhapatra | गर्मीसँगै यासागुम्बा संकलन शुरु                               | 2008 | बेनी समाचारदाता            | Beni, Baglung |
| Gorkhapatra | विद्यार्थी यासागुम्बा टिप्न हिँडेपछि<br>डेढसय विद्यालय बन्द   | 2008 | कंचनपुर समाचारदाता         | Kanchanpur    |
| Gorkhapatra | यासागुम्बा संकलन गर्नेको ओइरो                                 | 2009 | दिपक ओली                   | Bajhang       |
| Gorkhapatra | घट्यो यासागुम्बा खोज्न जानेहरुको<br>संख्या                    | 2009 | सम्वाददाता                 | Bajhang       |
| Gorkhapatra | यासागुम्बा टिप्न दर्जनौं विद्यालय बन्द                        | 2009 | प्रकाशविक्रम शाह शेरवहादुर | Rukum         |
| Gorkhapatra | यासा र कुटकीको मुल्य आकासियो                                  | 2009 | छेतु शेर्पा                | Sankhuwasabha |
| Gorkhapatra | यासा संकलकहरु दार्चुलाको लेकतर्फ                              | 2010 | सम्वाददाता                 | Darchula      |
| Gorkhapatra | विद्यार्थी किरा टिप्न गएपछि<br>विद्यालयहरु बन्द               | 2010 | सम्वाददाता                 | Dolpa         |
| Gorkhapatra | यासागुम्बाले झिलिमिली बन्ने भयो<br>मनाङ                       | 2010 | नारद गौतम                  | Manang        |
| Gorkhapatra | विद्यार्थी यासा टिप्न गएपछि चैत देखी<br>नै विद्यालय बन्द      | 2012 | बेनी समाचारदाता            | Beni, Baglung |
| Gorkhapatra | यासागुम्बा बेचेर विजुली                                       | 2012 | लमजुङ्ग समाचारदाता         | Manang        |
| Gorkhapatra | यासागुम्बा प्रतिकेजी २४ लाखसम्म                               | 2012 | समाचारदाता                 | Rukum         |
| Gorkhapatra | यासागुम्बा संकलनमा जानेक्रम शुरु                              | 2013 | संवाददाता                  | Dolakha       |
| Gorkhapatra | यासागुम्बा खोज्न विद्यार्थी लेकतिर                            | 2013 | सन्तोषी कार्की             | Dolakha       |



|             |                                                                |      |                          |                |
|-------------|----------------------------------------------------------------|------|--------------------------|----------------|
| Gorkhapatra | यासागुम्बा टिप्न गएका बालबालिका विरामी                         | 2013 | संवाददाता                | Sankhuwasabha  |
| Gorkhapatra | यासागुम्बा पाइने क्षेत्रमा मानिसको भिड                         | 2013 | संवाददाता                | Sankhuwasabha  |
| Gorkhapatra | यासागुम्बा बटुल्ल हिमालतिर                                     | 2013 | संवाददाता                | Taplejung      |
| Kantipur    | ५० लाखको यासागुम्बासहित २ जना पक्राउ                           | 2013 | संवाददाता                | Nepalgunj      |
| Kantipur    | यासागुम्बा खोज्न हिमाल तिर                                     | 2009 | कास                      | Dhangadhi      |
| Kantipur    | यासागुम्बा टिप्न मानव सागर र सयौं अलपत्र र पढाई छाडेर हिमालतिर | 2009 | विष्णुलाल बुढा र डि आर प | Dolpa and Mugu |
| Kantipur    | हडकडमा यार्चा बजार                                             | 2009 | दिपेन राइ                | Hongkong       |
| Kantipur    | यासागुम्बा सहित भिक्षु पक्राउ                                  | 2009 | कास                      | Kathmandu      |
| Kantipur    | उद्योगको अभावमा सस्तोमा जडिवुटी निकासी                         | 2009 | शिला पाण्डे              | Kathmandu      |
| Kantipur    | असुरक्षाले राजश्व टोली फिर्ता                                  | 2009 | राजवहादुर शाही           | Mugu           |
| Kantipur    | स्कूल बन्द गरेर यासागुम्बा टिप्न                               | 2009 | कृष्णप्रसाद गौतम         | Rukum          |
| Kantipur    | व्यापारी लुट्ने २ प्रहरी नियन्त्रणमा                           | 2010 | कास                      | Bajhang        |
| Kantipur    | चिसो पुगेन यासा र स्याउलाइ                                     | 2010 | कास                      | Manang         |
| Kantipur    | यार्चा खोज्दा नामावली संकलन कार्य प्रभावित                     | 2011 | कास                      | Jajarkot       |
| Kantipur    | हिम पहिरोमा पुरिएर तीनको मृत्यु                                | 2011 | कास                      | Jajarkot       |
| Kantipur    | पुनीमायाको काठमाडौं यात्रा ( वृत्तचित्रसम्बन्धी समाचार)        | 2011 | कास                      | Kathmandu      |
| Kantipur    | जर्नि टु यासा भर्सेज जर्नि टु सिंहदरवार                        | 2011 | अखण्ड भण्डारी            | Kathmandu      |
| Kantipur    | मलेशीयामा जर्नि टु यासा                                        | 2011 | कास                      | Malaysia       |
| Kantipur    | तुइनबाट भरेर बेपत्ता                                           | 2012 | संवाददाता                | Baitadi        |
| Kantipur    | पानी नपरेपछि यासा संकलक फर्किदै                                | 2012 | संवाददाता                | Darchula       |
| Kantipur    | यासा खोज्न गएकाको मृत्यु                                       | 2012 | संवाददाता                | Jajarkot       |
| Kantipur    | रुकुमेलीले हेरे आफ्नै कथा                                      | 2012 | संवाददाता                | Kathmandu      |
| Kantipur    | जसले मन विच्काउँछ                                              | 2012 | संवाददाता                | Kathmandu      |
| Kantipur    | एरीक अब यासागुम्बासाथ                                          | 2012 | संवाददाता                | Kathmandu      |
| Kantipur    | यासा संकलन क्षेत्रमा सुरक्षा बल कडा                            | 2012 | संवाददाता                | Mugu           |
| Kantipur    | मुगेलीले बेचे ४० करोडको यासा                                   | 2012 | संवाददाता                | Mugu           |
| Kantipur    | यासागुम्बा टिप्न लडेर मृत्यु                                   | 2012 | संवाददाता                | Myagdi         |

|          |                                                         |      |                           |               |
|----------|---------------------------------------------------------|------|---------------------------|---------------|
| Kantipur | कतारी क्याम्पमा पनि यासाँ                               | 2012 | कान्तिपुर स               | Qatar         |
| Kantipur | यासाँगुम्बाको मूल्य बढयो                                | 2012 | संवाददाता                 | Sankhuwasabha |
| Kantipur | यासाँ चोरी                                              | 2012 | संवाददाता                 | Sankhuwasabha |
| Kantipur | याचाँको मूल्य तेब्वर                                    | 2012 | संवाददाता                 | Taplejung     |
| Kantipur | हिमपहिरोमा ७ वेपत्ता                                    | 2013 | कास                       | Bajhang       |
| Kantipur | यासाँ टिप्नेको लकोँ लेकतिर                              | 2013 | कास                       | Bajhang       |
| Kantipur | गरिव गणना प्रभावित                                      | 2013 | कास                       | Jajarkot      |
| Kantipur | एक किलो यासाँसहित पक्राउ                                | 2013 | कास                       | Kathmandu     |
| Kantipur | राजधानीमा यासाँ लुटपाट बढ्दो                            | 2013 | कास                       | Kathmandu     |
| Kantipur | प्रहरीदारा अपहरण गरि लुटपाट                             | 2013 | कास                       | Kathmandu     |
| Kantipur | यासाँगुन्वुको अध्ययनमा जुट्दै विशेषज्ञ                  | 2013 | अब्दुल्लाह मिया           | Kathmandu     |
| Kantipur | राजश्व छल्दै याचाँ तिब्बततिर                            | 2013 | अब्दुल्लाह मिया           | Kathmandu     |
| Kantipur | मौसम खुलेपछि यासाँ टिप्नेको भिड                         | 2013 | कास                       | Manang        |
| Kantipur | यासाँ टिप्न मुगुका २८ विद्यालय बन्द                     | 2013 | कास                       | Mugu          |
| Kantipur | यासाँबाट ८४ लाख                                         | 2013 | कास                       | Mugu          |
| Kantipur | यासाँ व्यापारीबाट १० लाख लुटियो                         | 2013 | कास                       | Mugu          |
| Kantipur | यासाँ सहित दुइ पक्राउ                                   | 2013 | कास                       | Nepalgunj     |
| Kantipur | डोल्पामा प्रहरीको चरम ज्यादती दुइको मृत्यु दर्जनौँघाइते | 2014 | घनश्याम खड्का             | Dolpa         |
| Kantipur | उपल्लो डोल्पामा चार करोड लुटपाट                         | 2014 | विष्णुलाल बुढा            | Dolpa         |
| Kantipur | डोल्पा प्रकरणको पाठ                                     | 2014 | सम्पादकिय                 | Dolpa         |
| Kantipur | दुनैमा याचाँ व्यापारीको घुइचो                           | 2014 | विष्णुलाल बुढा र अब्दुलाह | Dolpa         |
| Kantipur | रित्तो हात फर्किए यासाँ संकलक                           | 2014 | भीम बहादुर सिंह           | Jajarkot      |
| Kantipur | याचाँको नमुना देखाउन हडकड पुगे सभासद                    | 2014 | कास                       | Kathmandu     |
| Kantipur | ५० किलो यासाँ बोकेर सभासद हडकडतिर                       | 2014 | अब्दुलाह मिहाँ            | Kathmandu     |
| Kantipur | यासाँबारे अध्ययन गर्न कार्यदल                           | 2014 | कास                       | Kathmandu     |
| Kantipur | सुभाब कार्यान्वयन भएन                                   | 2014 | कास                       | Kathmandu     |
| Kantipur | यासाँ टिप्न परिचयपत्र अनिवार्य                          | 2014 | कास                       | Kathmandu     |
| Kantipur | हिमपातले यासाँ संकलनमा ढिलाई                            | 2014 | राजबहादुर शाही            | Mugu          |
| Kantipur | याचाँ टिप्न विद्यार्थी लेकतिर                           | 2014 | कास                       | Myagdi        |
| Kantipur | डेढ किलो यासाँ सहित ७ पक्राउ                            | 2014 | जनक नेपाल                 | Nepalgunj     |

|          |                                                   |      |                        |                |
|----------|---------------------------------------------------|------|------------------------|----------------|
| Kantipur | यार्चा टिप्न पाटन जानेको लको                      | 2014 | कृष्णप्रसाद गौतम       | Rukum          |
| Kantipur | यार्सा ट्रेल                                      | 2014 | सुरबिन्द्र कुमार पुन   | Rukum          |
| Kantipur | विद्यार्थी ढोरपाटन तिर विद्यालय सुनसान            | 2015 | प्रकाश बराल            | Baglung        |
| Kantipur | दार्चुलामा यार्सा संकलकको मृत्यु                  | 2015 | मनोज बडु               | Darchula       |
| Kantipur | यार्चा मौसम                                       | 2015 | विष्णुलाल बुढा, मनोज ब | Darchula, Mugu |
| Kantipur | ११ दिनदेखि अलपत्र ३३ जनाको उदार                   | 2015 | कास                    | Dolakha        |
| Kantipur | यार्सा टिप्ना टिप्दै भूईचालो                      | 2015 | राजेन्द्र मानन्धर      | Dolakha        |
| Kantipur | शे फोक्सुन्डोमा ६ हजार संकलक                      | 2015 | विष्णुलाल बुढा         | Dolpa          |
| Kantipur | खोजी यार्साको                                     | 2015 | विष्णुलाल बुढा         | Dolpa          |
| Kantipur | यार्सा संकलकको उदार                               | 2015 | कास                    | Dolpa          |
| Kantipur | यार्चाबाट डोल्यामा अढाइलाख                        | 2015 | विष्णुलाल बुढा         | Dolpa          |
| Kantipur | डोल्याका शिक्षक र कर्मचारी पनि यार्सा टिप्दै      | 2015 | विष्णुलाल बुढा         | Dolpa          |
| Kantipur | मिसन यार्चा                                       | 2015 | अब्दुल्लाह मियाँ       | Dolpa          |
| Kantipur | विद्यार्थी यार्चा खोज्न हिडे                      | 2015 | भिम बहादुर सिंह        | Jajarkot       |
| Kantipur | जजरकोटका गाँउ पनि खाली                            | 2015 | भिम बहादुर सिंह        | Jajarkot       |
| Kantipur | पढाइ छुटाएर यार्चातिर                             | 2015 | एलपी देवकोटा           | Jumla          |
| Kantipur | निराश हुँदै फर्के यार्सा संकलक                    | 2015 | विष्णुलाल बुढा         | Karnali        |
| Kantipur | हिमालयन भियग्राको इतिवृत्ति                       | 2015 | उत्तमबाबु श्रेष्ठ      | Kathmandu      |
| Kantipur | साढे तीन केजी यार्सा सहित पाँच पक्राउ             | 2015 | कास                    | Kathmandu      |
| Kantipur | यार्सागुन्वुको रकम पिडितलाई                       | 2015 | कास                    | Manang         |
| Kantipur | यार्सा खोज्नेहरु फर्किए                           | 2015 | आश गुरुङ               | Manang         |
| Kantipur | यार्चा संकलक मनाङ पुगे                            | 2015 | कास                    | Manang         |
| Kantipur | यार्सा टिप्न सुचना जारी                           | 2015 | कास                    | Mugu           |
| Kantipur | यार्सा क्षेत्रमा सशस्त्र खटाइने                   | 2015 | कास                    | Mugu           |
| Kantipur | यार्सा राजश्व जिविसले उठाउने                      | 2015 | कास                    | Mugu           |
| Kantipur | यार्साबाट ७५ लाख राजश्व संकलन                     | 2015 | राजबहादुर शाही         | Mugu           |
| Kantipur | मुदीका बासिन्दा यार्सागुम्बा टिप्न हिमाल तिर लागे | 2015 | कास                    | Myagdi         |
| Kantipur | भुकम्पमा हराएका रोल्याली भेटिएनन                  | 2015 | काशी राम डाँगी         | Rolpa          |
| Kantipur | यार्चा किलोको २८ लाख                              | 2015 | कृष्ण प्रसाद गौतम      | Rukum          |

|          |                                                |      |                                                                                         |                 |
|----------|------------------------------------------------|------|-----------------------------------------------------------------------------------------|-----------------|
| Kantipur | यासा उत्पादन बर्षेनि घट्दो र यासा ...          | 2016 | बसन्त प्रताप सिंह                                                                       | Bajhang         |
| Kantipur | यासा उत्पादन घट्दो                             | 2016 | बसन्त प्रताप सिंह                                                                       | Bajhang         |
| Kantipur | यासा टिप्ने बहाना मा बन्यजन्तु सिकार           | 2016 | बसन्त प्रताप सिंह                                                                       | Bajhang         |
| Kantipur | यासा भारतबाट नेपाल तस्करी                      | 2016 | ठाकुर सिंह थारु                                                                         | Banke           |
| Kantipur | यासा उत्पादन घट्दो                             | 2016 | मनोज बडू                                                                                | Darchula        |
| Kantipur | मनांगमा यासागुम्बा टिप्न खुला                  | 2016 | आश गुरुङ                                                                                | Lamjung- Manang |
| Kantipur | यासा क्षेत्रमा व्यापक सुरक्षा कर्मी            | 2016 | राज बहादुर शाही                                                                         | Mugu            |
| Kantipur | हिमाल तिर सदै यासा                             | 2016 | राज बहादुर शाही                                                                         | Mugu            |
| Kantipur | यासा क्षेत्रमा गोलि चल्दा एक को मृत्यु         | 2016 | राज बहादुर शाही                                                                         | Mugu            |
| Kantipur | यासा संसार                                     | 2016 | सुरबिन्द्र कुमार पुन फिचर                                                               | Rukum           |
| Kantipur | हिमपातले यासा संकलन प्रभावित                   | 2017 | बसन्त प्रताप सिंह                                                                       | Bajhang         |
| Kantipur | अघिल्ला बर्ष भन्दा बाढी भेटियो यासा            | 2017 | बसन्त प्रताप सिंह                                                                       | Bajhang         |
| Kantipur | चुनाव सरेपछि यासागुम्बा खोज्न                  | 2017 | कास                                                                                     | Darchula        |
| Kantipur | यासा टिप्दा टिप्दै दुइको मृत्यु                | 2017 | कास                                                                                     | Darchula        |
| Kantipur | यासा संकलन सुरु                                | 2017 | कास                                                                                     | Dolpa           |
| Kantipur | यासा सिजन ...                                  | 2017 | सुरबिन्द्र कुमार पुन फिचर                                                               | Dolpa           |
| Kantipur | यासा सिजन ...                                  | 2017 | सुरबिन्द्र कुमार पुन फिचर                                                               | Dolpa           |
| Kantipur | यासागुम्बु टिप्ने शुल्क असुली मा कमि           | 2017 | कास                                                                                     | Mugu            |
| Kantipur | यासा उत्पादन घट्दो मूल्य बढ्यो                 | 2017 | हरि गौतम रुकुम, राजबहादुर                                                               | Mugu            |
| Kantipur | यासागुम्बु संकलन घट्दो                         | 2017 | कास                                                                                     | Myagdi          |
| Kantipur | यासा र संकलक दुवै घटे                          | 2017 | एलपी देवकोटा जुम्ला ,<br>बिष्णु लाल बुडा डोल्पा,<br>भिम बहादुर सिंह<br>जाजरकोट हरि गौतम | Rukum           |
| Kantipur | यासा सिजन सुरु                                 | 2017 | हरि गौतम                                                                                | Rukum           |
| Kantipur | रुकुममा यासा उत्पादन घट्दो                     | 2017 | संवाददाता                                                                               | Rukum           |
| Kantipur | यासाबाट २० लाख राजस्व                          | 2018 | बसन्त प्रताप सिंह                                                                       | Bajhang         |
| Kantipur | किरा पाउनै, छाड्यो अब के खाने ?                | 2018 | बसन्त प्रताप सिंह                                                                       | Bajhang         |
| Kantipur | अनुमती बिना यासा सङ्कलन गर्ने<br>४९ जना पक्राउ | 2018 | विष्णुलाल बुडा                                                                          | Dolpa           |

|          |                                                 |      |                           |                           |
|----------|-------------------------------------------------|------|---------------------------|---------------------------|
| Kantipur | यार्चाले पढाइ अधुरो                             | 2018 | राज बहादुर शाही र विष्णु  | Dolpa                     |
| Kantipur | २ संकलकको उद्धार                                | 2018 | सम्बादता                  | Dolpa                     |
| Kantipur | पढाइ खर्च जुटाउन यार्चा खोच्दा                  | 2018 | भीम बहादुर सिंह           | Dolpa                     |
| Kantipur | जडिबुटी भण्डार                                  | 2018 | भरत कुमार पुन             | Kathmandu                 |
| Kantipur | यासांगुम्बा संकलन                               | 2018 | आस गुरुङ                  | Lamjung                   |
| Kantipur | यार्चा खरिद पुर्जी लिन न्युन                    | 2018 | सम्बादता                  | Mugu                      |
| Kantipur | गाउ पाल्ने बुकी                                 | 2018 | हरि गौतम                  | Rukum (East)              |
| Kantipur | हिउले यार्चा टिप्न ढिलाई                        | 2018 | हरि गौतम                  | Rukum (East)              |
| Kantipur | यार्चा टिप्न लार्को                             | 2018 | हरि गौतम                  | Rukum (East)              |
| Kantipur | यार्चा खोज्दा शिक्षक विद्यार्थी                 | 2018 | सम्बादता                  | Rukum (East)              |
| Kantipur | यार्चा सिजनमा १५ करोडको करोबार                  | 2018 | सम्बादता                  | Rukum (East)              |
| Kantipur | रुकुम पूर्वको पुपाल लेकमा सुरक्षार्थ खटिन जाँदै | 2018 | सुरबिन्द्र कुमार पुन-     | Rukum (East)              |
| Kantipur | यार्चाको रखवाली                                 | 2018 | सुरबिन्द्र कुमार पुन      | Rukum (East)              |
| Kantipur | यार्चा टिप्न चटारो                              | 2018 | अनिश तिवारी               | Sindhupalchok             |
| Kantipur | अवैध बाटोमा हिमाली हिरा                         | 2018 | कैलेन्द्र सेजुवाल र राज ब | Surkhet and Mugu          |
| Kantipur | राइ ढुङ्गि क्षेत्रमा यासा संकलन                 | 2019 | बसन्त प्रताप सिंह         | Bajhang                   |
| Kantipur | यासा सिजन सुरु                                  | 2019 | मनोज बडु                  | Darchula                  |
| Kantipur | यासा संकलन गर्न परिचयपत्र अनिवार्य              | 2019 | सम्बादता                  | Darchula                  |
| Kantipur | दार्चुलाको व्यास गाउँपालिका                     | 2019 | मनोज बडू                  | Darchula                  |
| Kantipur | यार्चा टिप्न पाटनमै पल्टनै                      | 2019 | विष्णुलाल बुढा            | Dolpa                     |
| Kantipur | यासा खोज्न ज्यान बाजी                           | 2019 | राज बहादुर शाही/ विष्णु   | Dolpa/Mugu/Rukum(east)    |
| Kantipur | यार्चा खोज्ना जडा ऋणको भारी                     | 2019 | भीम बहादुर सिंह           | Jajarkot                  |
| Kantipur | यासा टिप्न गएका ३ को मृत्यु                     | 2019 | सम्बादता                  | Jajarkot, Dolpa, Rukum (e |
| Kantipur | यार्चाको जोखिम यात्रा                           | 2019 | सम्पदाकिय                 | Kathmandu                 |
| Kantipur | गरिबिले जिदगी दाउमा                             | 2019 | भीम बहादुर सिंह           | Kathmandu                 |
| Kantipur | यार्चा खोज्न नागरिकता                           | 2019 | आस गुरुङ                  | Lamjung                   |
| Kantipur | यासा हिउँले खाने                                | 2019 | राज बहादुर शाही           | Mugu                      |

|          |                                                                                   |      |                          |                       |
|----------|-----------------------------------------------------------------------------------|------|--------------------------|-----------------------|
| Kantipur | थन्कियो यासा झोला                                                                 | 2019 | राज बहादुर शाही          | Mugu                  |
| Kantipur | यार्चा टिप्न समयसिमा                                                              | 2019 | राज बहादुर शाही/ विष्णु  | Mugu                  |
| Kantipur | यासा याम बिल्ले लग्यो, हिउँ पग्लियन                                               | 2019 | कान्तिपुर                | Rukum (East)          |
| Kantipur | यार्चा जोगाउँन बुकी तिरा युवाहरु                                                  | 2019 | हरि गौतम                 | Rukum (East)          |
| Kantipur | बहिराकालाइ पाटनमा यार्चा टिप्न बन्देज                                             | 2019 | हरि गौतम                 | Rukum (East)          |
| Kantipur | यार्चाको हिसाब सार्वजनिक                                                          | 2019 | सम्बादता                 | Rukum (East)          |
| Kantipur | सामुहिक बिनासको संघार                                                             | 2020 | उत्तम बाबु श्रेष्ठ       | Kathmandu             |
| Kantipur | जैविक बिबिधता अन्वेषणको खाचो                                                      | 2020 | उत्तम बाबु श्रेष्ठ       | Kathmandu             |
| Kantipur | यासागुम्बा टिप्न ४८ विद्यालय बन्द                                                 | 2008 | कास                      | Bajhang               |
| Kantipur | यार्चागुम्बु संकलकद्वारा प्रशासन घेराउ                                            | 2008 | विक्रम गिरी              | Darchula              |
| Kantipur | यार्चागुम्बुमा गाविसकै कर                                                         | 2008 | वित्रम गिरी              | Darchula              |
| Kantipur | हिमपातले यार्चागुम्बु संकलनमा ढिलाइ                                               | 2008 | कास                      | Darchula              |
| Kantipur | जलवायु परिवर्तनले यार्चागुम्बु संकलनमा अवरोध र विद्यार्थी हिमाल तिर विद्यालय बन्द | 2008 | वित्रम गिरी / भीम बहादुर | Darchula and Jajarkot |
| Kantipur | यार्चामा कर लगाएपछि नाकाबन्दि                                                     | 2008 | कान्तिपुर                | Dolpa                 |
| Kantipur | यार्चा पाइने क्षेत्रमा हिमपात                                                     | 2008 | कान्तिपुर                | Dolpa                 |
| Kantipur | यार्चागुम्बु टिप्न मानव ओइरो                                                      | 2008 | कान्तिपुर                | Dolpa                 |
| Kantipur | यार्चा संकलनमा गएका दुइकेf मृत्यु                                                 | 2008 | कान्तिपुर                | Dolpa                 |

|          |                                                                   |      |                               |                         |
|----------|-------------------------------------------------------------------|------|-------------------------------|-------------------------|
| Kantipur | यार्चा टिप्न विद्यार्थिकै भिड, घुम्ती विद्यालय, बालबालिका जेखिममा | 2008 | बिष्णुलाल बुढा                | Dolpa                   |
| Kantipur | यार्चागुम्बु संकलनको मृत्यु                                       | 2008 | सम्वाददाता                    | Dolpa                   |
| Kantipur | यार्चा टिप्न लेक लागेर ७ को मृत्यु र खाँदा तीन सिकिस्त            | 2008 | बिष्णुलाल बुढा र अर्जुन       | Dolpa and Bajura        |
| Kantipur | यार्चागुम्बु निर्देशिकाबारे विवाद हुँदा भडप र हिमपातले अवरोध      | 2008 | कान्तिपुर सम्वाददाता          | Dolpa and Rukum         |
| Kantipur | यार्चा टिप्न गएका २ को मृत्यु                                     | 2008 | कान्तिपुर                     | Jumla                   |
| Kantipur | कुकुरले यासा समात्यो                                              | 2008 | कास                           | Kathmandu               |
| Kantipur | होटल बन्द गरि यासा खेज्न्                                         | 2008 | कृष्णा थापा                   | Rasuwa                  |
| Kantipur | यार्चागुम्बु बरामद                                                | 2008 | कास                           | Sankhuwasabha           |
| Kantipur | यार्चागुम्बु संकलन शुरू                                           | 2008 | कान्तिपुर सम्वाददाता          | Sankhuwasabha           |
| Kantipur | यार्चागुम्बा संकलनमा अनुमति                                       | 2008 | कान्तिपुर सम्वाददाता          | Sankhuwasabha           |
| Kantipur | सिजन यासाको र तलतलै पाइन थाल्यो                                   | 2008 | विक्रम गिरी                   | Sankhuwasabha and Darch |
| Kantipur | कम उचाईका यार्चागुम्बु नखाऔं र हडकड लैजान कडाइ                    | 2008 | सुरेन्द्र सुवेदी र सम्वाददाता | Sankhuwasabha and Kathr |
| Kantipur | टिपिएको यार्चागुम्बु जिउँदै                                       | 2008 | मोती पौडेल                    | Surkhet and Dolpa       |
| Kantipur | यासा टिप्न जाने ६ जनाकै मृत्यु                                    | 2011 | हिमाल जोशी                    | Bajhang                 |
| Kantipur | यासा टिप्न गएकाको हत्या                                           | 2011 | कान्तिपुर सम्वाददाता          | Bajhang                 |
| Kantipur | यासा ब्यापारी लुटिए                                               | 2011 | कान्तिपुर सम्वाददाता          | Dolpa                   |
| Kantipur | स्कूल छाडेर यासा टिप्न                                            | 2011 | कान्तिपुर(कोपिला)             | Dolpa                   |
| Kantipur | पढाइ खर्च जुटाउन हिमालतिर                                         | 2011 | भिम बहादुर सिंह               | Jajarkot                |
| Kantipur | दश किलो यासागुम्बा ढुवानी गर्ने हेलिकप्टर                         | 2011 | घनश्याम खड्का                 | Myagdi                  |
| Kantipur | यासाले फेर्यो जिवनस्तर                                            | 2011 | बिष्णुलाल बुढा, कृष्णप्रसाद   | Nepalgunj               |
| Kantipur | यासा संकलनस्थलमा झडप, ६ घाइते                                     | 2011 | कान्तिपुर स                   | Rukum                   |
| Kantipur | यासागुम्बा टिप्न गाउँ खाली र ६० विद्यालय बन्द                     | 2011 | कृष्णप्रसाद गौतम र हिमा       | Rukum                   |
| Kantipur | यासागुम्बाको मूल्य तेब्वर बृद्धि                                  | 2012 | हिमाल जोशी                    | Bajhang                 |

|          |                                                                                                |      |                                |                    |
|----------|------------------------------------------------------------------------------------------------|------|--------------------------------|--------------------|
| Kantipur | यासांगुम्बासहित पक्राउ                                                                         | 2012 | कान्तिपुर स                    | Biratnagar         |
| Kantipur | यासांगुम्बाको कारोवारले संरक्षित क्षेत्र असुरक्षित                                             | 2012 | राजेन्द्र मानन्धर              | Dolakha            |
| Kantipur | यासा संकलक मृत भेटिए                                                                           | 2012 | कान्तिपुर स.                   | Dolpa and Dolakha  |
| Kantipur | विधार्थी लेकमा / विद्यालय कुर्दै शिक्षक                                                        | 2012 | हरिहर सिंह र राजबहादुर         | Jajarkot and Mugu  |
| Kantipur | विधार्थी यार्चा टिप्न विद्यालय बन्द र लडेर एकको मृत्यु                                         | 2012 | भिम बहादुर सिंह र कास          | Jajarkot and Rukum |
| Kantipur | यासांगुम्बा बरामद                                                                              | 2012 | कान्तिपुर स.                   | Kavre              |
| Kantipur | यासाको राजश्व न्यून                                                                            | 2012 | कान्तिपुर स.                   | Mugu               |
| Kantipur | यार्चा टिप्नेको लको                                                                            | 2012 | कृष्णप्रसाद गौतम               | Rukum              |
| Kantipur | चिसोले यासा संकलक बिरामी र वन्यजन्तु घटे                                                       | 2012 | कृष्णप्रसाद गौतम र कास         | Rukum and Mugu     |
| Kantipur | यासांगुम्बाको मूल्य बढ्यो                                                                      | 2012 | कान्तिपुर स                    | Sankhuwasabha      |
| Kantipur | यार्चागुम्बुबाट एकै गाउँमा डेढ करोड                                                            | 2013 | घनश्याम खड्का                  | Myagdi             |
| Kantipur | यार्चागुम्बुबाट एकै परिवारको] कमाइ १७ लाख र किलोको २८ लाख                                      | 2013 | कृष्णप्रसाद गौतम               | Rukum              |
| Kantipur | यार्चागुम्बा मासिए                                                                             | 2013 | कास                            | Sankhuwasabha      |
| Kantipur | वन्यजन्तु अंगका तस्करी बढ्यो                                                                   | 2014 | खगेन्द्र अवस्थी                | Baitadi            |
| Kantipur | यासा टिप्नेको लको लेकतिर                                                                       | 2014 | हिमाल जोशी                     | Bajhang            |
| Kantipur | यासा संकलनकोलागि अनुमति                                                                        | 2014 | कास                            | Dolpa              |
| Kantipur | यार्चाले ल्याएको समृद्धि र जीवनबुटीको सहारा                                                    | 2014 | अब्दुलाह मिहाँ र राजु क्षेत्री | Dolpa              |
| Kantipur | शुल्क विवादले भडप र यार्चागुम्बुसहित ५ पक्राउ                                                  | 2014 | कान्तिपुर स.                   | Dolpa              |
| Kantipur | राजस्व छल्दै तिब्बततर्फ यार्चा र संकलक भन्छन् यो वर्ष किरै पाइएन र संकलनमा सुरक्ष चुनौती बढ्दो | 2014 | अब्दुलाह मिहाँ/विष्णुलाल व     | Dolpa              |
| Kantipur | किन भयो डोल्यामा भिडन्त ?                                                                      | 2014 | अब्दुलाह मिहाँ/विष्णुलाल व     | Dolpa              |



|          |                                                       |      |                            |                |
|----------|-------------------------------------------------------|------|----------------------------|----------------|
| Kantipur | याचामै मस्ती                                          | 2014 | अब्दुलाह मिहाँ/विष्णुलाल व | Dolpa          |
| Kantipur | यासा बेचेर कम्तीमा ५० हजार                            | 2014 | भिम बहादुर सिंह            | Jajarkot       |
| Kantipur | यासा टिप्न बालक देखि वृद्धसम्म                        | 2014 | राजबहादुर शाही             | Mugu           |
| Kantipur | यासाबाट करोड राजस्व संकलन                             | 2014 | कास                        | Mugu           |
| Kantipur | याचा किन्ने ? गोटाको ५ सय                             | 2014 | राजबहादुर शाही             | Mugu           |
| Kantipur | यासा टिप्न गएका ५ को मृत्यु र शव पोस्टमार्टम भएन      | 2014 | राजबहादुर शाही             | Mugu and Dolpa |
| Kantipur | यारसा टिप्ने चटारे                                    | 2014 | कृष्ण प्रसाद गौतम र रा     | Rukum          |
| Kantipur | जुम्लामा हरेक गाविसका छुट्टै लेक                      | 2014 | कृष्ण प्रसाद गौतम र रा     | Rukum          |
| Kantipur | याचा संकलन स्थलमा झडप                                 | 2014 | कास                        | Rukum          |
| Kantipur | याचाको भाउ प्रतिकिलो २५ लाख                           | 2014 | कान्तिपुर स.               | Rukum          |
| Kantipur | मनाङमा यसपालि बाहिरी जिल्लाकालाइ यासागुम्बा टिप्न रोक | 2020 | आश गुरुङ                   | Lamjung        |
| Kantipur | हामीलाई कहिले पो जोखिम छैन र?                         | 2021 | बसन्त प्रताप सिंह-         | Bajhang        |
| Kantipur | हिमाली पाटनमा मदिराका बोटलमात्रै ५० लाख भन्दा बढी     | 2021 | बसन्त प्रताप सिंह-         | Bajhang        |
| Kantipur | याचा घट्यो, मुस्किल बढ्यो                             | 2021 | बसन्त प्रताप सिंह          | Bajhang        |
| Kantipur | महंगीयो याचा                                          | 2021 | हरि गौतम                   | Rukum (East)   |
| Kantipur | यासाको खोजीमा                                         | 2021 | अनिश तिवारी                | Sindhupalchok  |
| Kantipur | विद्यार्थी सबै यासा खोज्न                             | 2014 | खगेन्द्र अवस्थी            | Baitadi        |
| Karobar  | यासा टिप्न नपाउँदा गुम्दै राजस्व                      | 2020 | समाचारदाता                 | Bajhang        |
| Karobar  | यासा संकलन कार्यविधि बनाउने तयारी                     | 2016 | प्रगति ढकाल                | Kathmandu      |
| Karobar  | यासा संकलन सुरु भएपछि मुगुका गाउँ रिक्तै              | 2016 | संवाददाता                  | Mugu           |
| Karobar  | रुकुममा यासा सिजन सुरु                                | 2016 | मेगराज खड्का               | Rukum          |

|         |                                                             |      |                 |          |
|---------|-------------------------------------------------------------|------|-----------------|----------|
| Karobar | यासांमा बितृष्णा संकलक आधा घटे                              | 2016 | मेघ राज खड्का   | Rukum    |
| Karobar | विद्यार्थी यासांगुम्बा टिप्न गएपछि<br>अधिकांश विद्यालय बन्द | 2017 | सम्वादाता       | Bajhang  |
| Karobar | यासांगुम्बुले धानेको जीवन                                   | 2017 | रासस            | Dolpa    |
| Karobar | कर्णालीमा चुनाव भन्दा यासां टिप्ने को<br>हतारो              | 2017 | रमेश रावल       | Kalikot  |
| Karobar | मनाङ्गमा यासांगुम्बु संकलन सुरु                             | 2017 | छविलाल बगाल     | Manang   |
| Karobar | डोल्पाका पटना १ गते देखी खुल्ने                             | 2018 | लेख बहादुर बुढा | Dolpa    |
| Karobar | यासां टिप्न भोलीबाट वन खुल्ने                               | 2018 | दान बहादुर बुढा | Mugu     |
| Karobar | यासां यात्रा                                                | 2018 | प्रेमराज खड्का  | Rukum    |
| Karobar | विक्री भएन यासांगुम्बा                                      | 2019 | समाचारदाता      | Darchula |
| Karobar | यासां नभेटिए पछि ऋण तिर्न<br>पाटनबाटै कालापहाड              | 2019 | सगर परियार-     | Jumla    |
| Karobar | यासांगुम्बा टिप्न नाम्के लेकतर्फ                            | 2019 | नेगम परियार     | Manang   |
| Karobar | यासां संकलनबाट ९० लाख राजश्व                                | 2019 | दान बहादुर बुडा | Mugu     |
| Karobar | यासां संकलन र जीवन संघर्ष-                                  | 2019 | मेघराज खड्का-   | Rukum    |
| Karobar | लकडाउन खुकुलो भएसँगै यासां<br>संकलन सुरु                    | 2020 | मकर राज धामी    | Bajhang  |
| Karobar | कालिञ्चोकम भेटियो यासांगुम्बु                               | 2020 | समाचारदाता      | Dolakha  |
| Karobar | यासां गुम्बा संकलनमा रोक                                    | 2020 | समाचारदाता      | Dolpa    |
| Karobar | लमजुङको लेकमा जडिबुटी को<br>अवैध सङ्कलन                     | 2020 | सन्देश पौडेल    | Lamjung  |
| Karobar | कोरोना जोखिमले यासां संकलनमा<br>रोक                         | 2020 | सन्देश पौडेल    | Lamjung  |
| Karobar | हिमालीमै कुहियो करौडौं मुल्यको<br>यासांगुम्बा               | 2020 | दान बहादुर बुढा | Mugu     |
| Karobar | कोरोनाको जोखिमका बिच यासां<br>संकलक लेकतिर                  | 2021 | मकरराज धामी     | Bajhang  |

|         |                                                                        |      |                        |                 |
|---------|------------------------------------------------------------------------|------|------------------------|-----------------|
| Karobar | यासा संकलन क्षेत्र मा फोहोरै फोहोर                                     | 2021 | मकरराज धामी            | Bajhang         |
| Karobar | रुकुम (पूर्व) मा यासा सङ्कलन रोक                                       | 2021 | राष्ट्रिय समाचार समिति | Rukum (East)    |
| Karobar | यासागुम्बु को भाउ घट्ने                                                | 2010 | बिपेन्द्र कार्की       | Kathmandu       |
| Karobar | यासागुम्बु को भाउ घट्यो                                                | 2010 | बिपेन्द्र कार्की       | Kathmandu       |
| Karobar | यासा खोज्न गएकाहरु घर फर्किए                                           | 2011 | सुरेन्द्र सिंह         | Jajarkot        |
| Karobar | यासाबाट २० लाख राजस्व चुहावट                                           | 2011 | संखुवासभा              | Kathmandu       |
| Karobar | मनाङमा यासागुम्बु टिप्ने सिजन सुरु                                     | 2011 | लम्जुङ्ग               | Kathmandu       |
| Karobar | यासागुम्बुको चोरी निकाशी                                               | 2011 | कास                    | Sankhuwasabha   |
| Karobar | यासागुम्बा खरिद गर्न गएका व्यापारीको २० लाख रुपैयाँ चोरी               | 2012 | संवाददाता              | Lamjung         |
| Karobar | यासागुम्बा बेचेर बिजुली                                                | 2012 | संवाददाता              | Manang          |
| Karobar | यासा ओसार्न गाउँमै जहाज चार्टर                                         | 2013 | लोकेन्द्र बिष्ट        | Dhangadhi       |
| Karobar | वनतिरै ज्यान गुमाउँदै यासा संकलक                                       | 2014 | नरी बडू                | Baitadi         |
| Karobar | सबै यासा टिप्न गएपछि गाउँ शुन्य                                        | 2014 | संवाददाता              | Dolpa           |
| Karobar | हिमपातका कारण यासा टिप्दै गरेकाको बिचल्ली                              | 2014 | संवाददाता              | Jajarkot        |
| Karobar | रित्तो हात फर्किए यासा संकलकहरु                                        | 2014 | संवाददाता              | Jajarkot        |
| Karobar | यासागुम्बासंग जोडिएको समृद्धि                                          | 2014 | कृष्णहरी बास्कोटा      | Kathmandu       |
| Karobar | यासागुम्बु लुट्न गएका हतियारसहित पक्राउ, मनाङ्गमा सुरक्ष्या अवस्था कडा | 2014 | छबिलाल बगाले           | Lamjung- Manang |
| Karobar | मनाङ्गमा हरेक वर्ष १ अर्ब बराबरको यासागुम्बु बिक्री                    | 2014 | छबिलाल बगाले           | Manang          |
| Karobar | यासा संकलकबाट १ करोड बढी राजस्व संकलन                                  | 2014 | सुकमाया शाही           | Mugu            |
| Karobar | ५० करोडको यासासंगै बाघको छाला र कस्तुरी पनि तिब्बत पुग्यो              | 2014 | सुकमाया शाही           | Mugu            |

|         |                                                                    |      |                         |                 |
|---------|--------------------------------------------------------------------|------|-------------------------|-----------------|
| Karobar | लामटाङ्ग निकुञ्जमा यासागुम्बा संकलन गर्न पाईने                     | 2014 | रामहरि न्यौपान          | Nuwakot         |
| Karobar | पहिलोपटक हेलिकोप्टर चार्टर गरि यासा हुवानी, अवैध यासा पक्राउ गरिदै | 2014 | लाम्पासाङ्गे शेर्पा     | Sankhuwasabha   |
| Karobar | साढे २ किलो यासागुम्बासहित ५ पक्राउ                                | 2014 | टंक खड्का               | Sindhupalchok   |
| Karobar | दूण बटा कस्तुरी मृग माने तामाङ्ग पक्राउ                            | 2014 | संवाददाता               | Solukhumbhu     |
| Karobar | हिमपातका कारण यासागुम्बामा ढिलाई हुने                              | 2015 | रासस                    | Darchula        |
| Karobar | दार्चुलामा यासा संकलक ३५ हजार पुगे                                 | 2015 | संवाददाता               | Darchula        |
| Karobar | तस्करीको 'पारवहन नाका' बन्दै उत्तरी गोरखा                          | 2015 | रासस                    | Gorkha          |
| Karobar | यासा टिप्न दुइ सय विद्यार्थीद्वारा निवेदन                          | 2015 | रासस                    | Jumla           |
| Karobar | बैशाखमा वर्षासहित हिमपात भएपछि यासा टिप्न ढिलाई                    | 2015 | रमेश रावल               | Kalikot         |
| Karobar | यासागुम्बा टिप्न पाटनतिर                                           | 2015 | रमेश रावल               | Kalikot         |
| Karobar | यासागुम्बाको पुर्जा रकम भुक्तम्प पिडितलाई                          | 2015 | छबिलाल बगाले            | Lamjung- Manang |
| Karobar | विद्यार्थीहरु पढाई छाडेर यासागुम्बा संकलन                          | 2015 | सुकमाया शाही            | Mugu            |
| Karobar | मुगुमा यासा संकलनमा रोक                                            | 2020 | कारोबार संवाददाता       | Mugu            |
| Karobar | यासा टिप्न गएका एकाको मृत्यु-                                      | 2021 | का स                    | Jumla           |
| Karobar | कोरोनाका कारण यासागुम्बा संकलनमा रोक                               | 2021 | दान बहादुर बूढा         | Mugu            |
| Nagarik | विद्यार्थी यासागुम्बा टिप्न, दुई दर्जन विद्यालय बन्द               | 2009 | दिल बहादुर छन्त्याल     | Bajhang         |
| Nagarik | मनाङमा यासागुम्बा टिप्न गएका ७ वेपत्ता                             | 2009 | मनोज अधिकारी, सन्तोष पो | Manang          |
| Nagarik | मनाङमा मारिएका दुइको शव भेटियो                                     | 2009 | सन्तोष पोखेल            | Manang          |
| Nagarik | यासागुम्बा संकलन खुला                                              | 2010 | दिनेस कार्की            | Bajhang         |
| Nagarik | मनाङवासीलाई यासागुम्बा टिप्न चटारो                                 | 2010 | सन्तोष पोखेल            | Manang          |

|         |                                                                 |      |                        |                     |
|---------|-----------------------------------------------------------------|------|------------------------|---------------------|
| Nagarik | मनाङमा यासागुम्बा संकलनकर्ताको संख्या घट्यो                     | 2010 | सन्तोष पोखेल           | Manang              |
| Nagarik | यासागुम्बा विवादमा भडप, १५ घाइते                                | 2010 | कलम थापा               | Rukum               |
| Nagarik | यासागुम्बा टिप्न गएका पाँचको मृत्यु                             | 2011 | नास                    | Bajhang             |
| Nagarik | बाहिरीयालाई यासागुम्बा टिप्न रोक                                | 2011 | नास                    | Manang              |
| Nagarik | स्कूल छोडेर यासागुम्बा टिप्न                                    | 2011 | कलम थापा               | Rukum               |
| Nagarik | च्याउको आशमा                                                    | 2011 | सन्तोष शर्मा           | Rukum               |
| Nagarik | यासा टिप्नै फिल्म हेर्दै                                        | 2011 | कलम थापा               | Rukum               |
| Nagarik | यासा टिप्न लेकतिर                                               | 2012 | रमेश खतिवडा            | Dolakha             |
| Nagarik | किलोको २४ लाखमा बिक्रयो यासा                                    | 2012 |                        | Rukum               |
| Nagarik | यासागुम्बा अब चीन तस्करी                                        | 2012 | धुव्र दंगाल            | Sindhupalchok       |
| Nagarik | यासाबाट एकै गाँउमा भित्रियो चार करोड                            | 2012 | धुव्र दंगाल            | Sindhupalchok       |
| Nagarik | विद्यार्थी यासागुम्बा टिप्न हिडेपछि विद्यालय बन्द               | 2013 | वरुण पनेरु             | Darchula            |
| Nagarik | यासागुम्बा टिप्न जाँदा वर्षेनी दर्जनौको मृत्यु यो वर्ष ६ जना    | 2013 | वरुण पनेरु             | Darchula            |
| Nagarik | यासागुम्बा संकलन र वातावरण संरक्षण                              | 2013 | रविन्द्र शाही          | Kathmandu           |
| Nagarik | हिमाली भियोग्र पछ्याउदै                                         | 2013 | उत्तमबाबु श्रेष्ठ फिचर | Kathmandu           |
| Nagarik | जैविक सुनको अवैध व्यापार                                        | 2013 | फिचर                   | Kathmandu           |
| Nagarik | यासागुम्बाको आमदानीले विजुली                                    | 2013 | सन्तोष पोखेल           | Manang              |
| Nagarik | यासा टिप्नु कि नागरिकता भिक्नु                                  | 2013 | सुरेन्द्र पौडेल        | Manang              |
| Nagarik | यासाबाट डेढ करोडको आमदानी                                       | 2013 | नास                    | Myagdi              |
| Nagarik | मनपरी संकलनले विलाउँदै बुटी र यासाको जीवनचक्र नबुझ्दा           | 2014 | विक्रम गिरी, जगत खड्का | Bajhang             |
| Nagarik | यासा नभेटिदा संकलकलाई मानसिक तनाव                               | 2014 | विक्रम गिरी, जगत खड्का | Bajhang             |
| Nagarik | यासा टिप्ने भन्दै वन्यजन्तु तस्करी र धन्तै पिच्छे बन्दुक पडकन्छ | 2014 | विक्रम गिरी, जगत खड्का | Bajhang             |
| Nagarik | कर उठाउने, ज्यानै गुम्दा पनि क्षतिपूर्ति नदिने                  | 2014 | विक्रम गिरी, जगत खड्का | Bajhang             |
| Nagarik | जीवन बदले जडिवुटी र जीवन                                        | 2014 | कलेन्द्र केजुवाल       | Bajhang and Karnali |
| Nagarik | जडिवुटी केन्द्र बन्दै सुर्खेत                                   | 2014 | कलेन्द्र केजुवाल       | Bajhang and Karnali |
| Nagarik | गाउँले यासा टिप्न, गाउँ सुनसान                                  | 2014 | प्रेम चुनारा           | Darchula            |
| Nagarik | राजश्व विवादले ज्यान लियो                                       | 2014 | कलेन्द्र सेजुवाल       | Dolpa               |

|         |                                                      |      |                                     |                   |
|---------|------------------------------------------------------|------|-------------------------------------|-------------------|
| Nagarik | पैसा टिप्न हत्केलामा ज्यान यार्चा टिप्न, गाउँ सुनसान | 2014 | कलेन्द्र सेजुवाल                    | Dolpa and Mugu    |
| Nagarik | यासाले गाँउ र स्कुल रिक्तै                           | 2014 | नास                                 | Jajarkot          |
| Nagarik | यासाको द्वन्द व्यवस्थापन                             | 2014 | उत्तमबाबु श्रेष्ठ                   | Kathmandu         |
| Nagarik | यासाको संरक्षण                                       | 2014 | सम्पादकिय                           | Kathmandu         |
| Nagarik | यासागुम्बाको व्यवस्थापन                              | 2014 | फणीन्द्र प्रसाद न्यौपाने विच        | Kathmandu         |
| Nagarik | यार्चा टिप्न स्कुल बन्द                              | 2014 | सुमन मल्ल                           | Mugu              |
| Nagarik | यासामा गाउँलेको नियन्त्रण                            | 2014 | सुमन मल्ल                           | Mugu              |
| Nagarik | पर्यावरणीय दोहनले स्थानिय संकटमा र यासा संकलक लुटिए  | 2014 | सुरेन्द्र केजुवाल                   | Surkhet           |
| Nagarik | रिक्तिदै यासा भण्डार                                 | 2014 | कलेन्द्र सेजुवाल                    | Surkhet           |
| Nagarik | घाटाको यासा यात्रा                                   | 2015 | देवेन्द्र बस्नेत                    | Dang              |
| Nagarik | यासा लिन गएकाहरु ऋण बोकेर फर्किए                     | 2015 | नर स                                | Dolpa             |
| Nagarik | यासा तिब्बत पुऱ्याउन हेलिकप्टर                       | 2015 | नर स                                | Dolpa             |
| Nagarik | ऋण बोकेर फर्किए यासा संकलक                           | 2015 | कलेन्द्र केजुवाल, डिवी बुढा         | Dolpa and Bajhang |
| Nagarik | हिमाली हिरा अवैध रुपमा तिब्बत                        | 2015 | नास                                 | Kathmandu         |
| Nagarik | प्रहरी बनेर यासा लुटने गिरोह पक्राउ                  | 2015 | नास                                 | Kathmandu         |
| Nagarik | यासामा ज्यानकै बाजी                                  | 2015 | देवेन्द्र बस्नेत                    | Rukum             |
| Nagarik | यासामा मनोमानी                                       | 2016 | देवेन्द्र बस्नेत                    | Dang              |
| Nagarik | यासा खोज्दै स्थानीय                                  | 2016 | संवाददाता फोटो                      | Darchula          |
| Nagarik | यासा टिप्नै हजारौ मानिस                              | 2016 | प्रेम चुनारा                        | Darchula          |
| Nagarik | यासागुम्बा संकलन सुरु                                | 2016 | रासस                                | Dolpa             |
| Nagarik | यासा मोहले ऋण बोकायो                                 | 2016 | डीबी बुडा                           | Jumla             |
| Nagarik | मुगु को उच्च भेगमा यासा खोज्दै स्थानीय               | 2016 | सुमन मल्ल फोटो                      | Mugu              |
| Nagarik | पुपाल यासा महोत्सव सुरु                              | 2016 | रासस                                | Rukum             |
| Nagarik | ज्यानकै बाजी थपेर लेकमा                              | 2016 | देवेन्द्र बस्नेत दाङ्ग प्रेम चुनारा | Rukum             |
| Nagarik | खस्कियो यासा कमाइ                                    | 2016 | देवेन्द्र बस्नेत दाङ्ग गणेश वि      | Rukum             |
| Nagarik | यासाको अर्थ                                          | 2017 | राम चन्द्र न्यौपाने                 | Dolpa             |
| Nagarik | यासाको मूल्य आधा घट्यो                               | 2017 | हरि कृष्ण गौतम                      | Myagdi            |
| Nagarik | यासा खोज्न हिमालतिर फोटो                             | 2017 | गणेश विक                            | Rukum             |
| Nagarik | जुरुक्क उठ्यो यासा                                   | 2018 | रमेश खतिवडा                         | Dolakha           |
| Nagarik | यासा टिप्ना जान बालबालिकालाइ रोक                     | 2018 | डीबी बुढा                           | Jumla             |

|         |                                                                  |      |                                 |                     |
|---------|------------------------------------------------------------------|------|---------------------------------|---------------------|
| Nagarik | पुर्जा बिना यासागुम्बा संकलन सुरु                                | 2018 | राष्ट्रिय समाचार समिति          | Mahendranagar       |
| Nagarik | यासा टिप्न नपाउदा नाकाबन्दी                                      | 2019 | जगत खड्का                       | Bajhang             |
| Nagarik | लेकमा थलिदै यासायात्रु                                           | 2019 | जगत खड्का                       | Bajhang             |
| Nagarik | यासा संकलनमा तीन किसिमको कर                                      | 2019 | जगत खड्का                       | Bajhang             |
| Nagarik | स्कूल बन्द शिक्षक-विद्यार्थी लेकमा                               | 2019 | जगत खड्का                       | Bajhang             |
| Nagarik | मासीदै हिमाली पर्यवरण                                            | 2019 | अमृत भादउले/ कमल खड्का          | Kathmandu           |
| Nagarik | यासा यात्राको बिचार                                              | 2019 | सम्पदाकिय                       | Kathmandu           |
| Nagarik | दार्चुला ब्यास गाउँपालिका को अपि फेदमा यासागुम्बा खोज्दै स्थानिय | 2019 | फोटो                            | Kathmandu           |
| Nagarik | विद्यालय बन्द गरि यासा खोज्दै शिक्षक                             | 2019 | गणेश विशु                       | Nepalgunj           |
| Nagarik | बुकी पाटनको यासामा सिन्डिकेट                                     | 2019 | लोकेन्द्र खनाल                  | Rukum               |
| Nagarik | यासा यात्रा ८ को ज्यान गयो                                       | 2019 | नागेन्द्र उपाध्याय/विष्णुप्रसाद | Surkhet / Dolpa     |
| Nagarik | कोरोनाले यस वर्ष हिमालमै बिलायो हिमाली हिरा                      | 2020 | बिरा गडाल र जगत खड्का           | Baitadi and Bajhang |
| Nagarik | यासागुम्बा जोखिममा : आइ यु सिएन                                  | 2020 | स्मृति ढुंगाना                  | Kathmandu           |
| Nagarik | यासागुम्बा टिप्न नपाउँदा नाकाबन्दी                               | 2021 | जगत खड्का                       | Bajhang             |
| Nagarik | यासागुम्बा संकलकको लडेर मृत्यु                                   | 2021 | समाचारदाता                      | Darchula            |
| Nagarik | डोल्पाको जग्दुल्ला गाउँपालिका पाटनमा यासागुम्बा खोज्दै           | 2021 | फोटो                            | Dolpa               |
| Nagarik | डोल्पामा ४९ यासागुम्बा तस्कर पक्राउ                              | 2021 |                                 | Dolpa               |

|             |                                                      |      |                |               |
|-------------|------------------------------------------------------|------|----------------|---------------|
| Nagarik     | यासागुम्बा हिस्की जापान निर्यात                      | 2021 |                | Kathmandu     |
| Nagarik     | यासागुम्बा सहित चार जना पक्राउ                       | 2021 | हिमनाथ देवकोटा | Rasuwa        |
| Nagarik     | यासागुम्बा खुला गर्ने सरकारको तयारी                  | 2021 | गणेश बिशु      | Surkhet       |
| Nagarik     | यासागुम्बा संकलनमा रोक                               | 2021 | गणेश बिशु      | Surkhet       |
| Nayapatrika | यासागुम्बा संकलन गर्नेको घुँइचो                      | 2008 | नपस            | Bajhang       |
| Nayapatrika | यासागुम्बा संकलनमा अवरोध                             | 2008 | नरेश खड्का     | Bajhang       |
| Nayapatrika | विद्यार्थी यासागुम्बा खोज्न हिँडेपछि विद्यालय बन्द   | 2008 | नपस            | Jajarkot      |
| Nayapatrika | परिक्षणका लागि यासागुम्बा मन्त्रालयमा                | 2008 | नपस            | Sankhuwasabha |
| Nayapatrika | विद्यार्थी यासागुम्बा खोज्न लेकतिर                   | 2008 | नपस            | Sankhuwasabha |
| Nayapatrika | यासा खोज्न हिँडे विद्यार्थी                          | 2009 | नपस            | Bajhang       |
| Nayapatrika | हिमाली भेगमा भेटिन छाड्यो यासागुम्बा                 | 2009 | बच्चु विक      | Darchula      |
| Nayapatrika | यासा विक्रि भएन                                      | 2010 | नपस            | Bajhang       |
| Nayapatrika | हिमाल मै पाइन छाड्यो यासा                            | 2010 | बच्चु विक      | Darchula      |
| Nayapatrika | यासागुम्बा टिप्न सोलुदेखि मुस्ताङ                    | 2010 | नपस            | Mustang       |
| Nayapatrika | यासा मूल्य हालसम्म कै महँगो                          | 2010 | नपस            | Rukum         |
| Nayapatrika | यासा चोरी निकासी बढ्यो                               | 2011 | नपस            | Bajhang       |
| Nayapatrika | रुकुमेली यासा टिप्न लेकतिर                           | 2011 | आदर्शकेसी      | Rukum         |
| Nayapatrika | यासागुम्बा संकलन क्षेत्रमा चोरको विगविगी             | 2011 | आदर्शकेसी      | Rukum         |
| Nayapatrika | विद्यार्थी यासागुम्बा संकलन गर्न गएपछि विद्यालय बन्द | 2012 | नरेश खड्का     | Bajhang       |
| Nayapatrika | यासाको राजश्व ५ प्रतिशत मात्रै                       | 2012 | नपस            | Bajhang       |
| Nayapatrika | यासागुम्बा संकलन गर्नेको भीड तर राजस्व संकलन बढेन    | 2012 | सुमन मल्ल      | Mugu          |
| Nayapatrika | यासा प्रति केजीको २४ लाख                             | 2012 | नपस            | Rukum         |
| Nayapatrika | यासा सहित तीन पक्राउ                                 | 2012 | नपस            | Sankhuwasabha |
| Nayapatrika | यासा महँगियो                                         | 2012 | नपस            | Sankhuwasabha |
| Nayapatrika | यासाबाट सातामै ९ लाख आम्दानी                         | 2012 | नपस            | Sindhupalchok |



|             |                                                     |      |                     |                   |
|-------------|-----------------------------------------------------|------|---------------------|-------------------|
| Nayapatrika | यासाको कमाइले बनायो जग्गाधनी                        | 2012 | नपस                 | Sindhupalchok     |
| Nayapatrika | यासा विक्रिमा रोक                                   | 2013 | नपस                 | Bajhang           |
| Nayapatrika | यासागुम्बा संकलनमा कमी                              | 2013 | हिराबहादुर खत्री    | Myagdi            |
| Nayapatrika | यासाको खोज्न गएपछि अधिकांश बस्ती सुनसान             | 2013 | राम कृष्ण बोहरा     | Myagdi, Baglung   |
| Nayapatrika | यासा टिप्नेको सुरक्षामा लागे प्रहरी                 | 2014 | सम्राट सिंह         | Bajhang           |
| Nayapatrika | हिउँ परेपछि यासा संकलक फर्किए घर                    | 2014 | नपस                 | Bajhang           |
| Nayapatrika | कर्मचारी पनि यासा खोज्दै                            | 2015 | नपस                 | Dolpa             |
| Nayapatrika | यासा संकलक फर्काउन सेना परिचालन                     | 2015 | नपस                 | Dolpa             |
| Nayapatrika | हिमपातले यो वर्ष यासा उत्पादन बढ्ने                 | 2015 | रामचन्द्र न्यौपाने  | Dolpa             |
| Nayapatrika | यासा संकलन गर्न जानेको भिड                          | 2015 | रासस फोटो           | Dolpa             |
| Nayapatrika | जाजरकोटका विद्यार्थी यासा खोज्न हिमालतर्फ           | 2015 | वीर बहादुर गीरी     | Jajarkot          |
| Nayapatrika | यासा खोज्न हिमालतिर जाजरकोटका गाँउ खाली             | 2015 | वीर बहादुर गीरी     | Jajarkot          |
| Nayapatrika | विद्यार्थी यासागुम्बा टिप्न गएपछि विद्यालय बन्द     | 2016 | सम्राट सिंह         | Bajhang           |
| Nayapatrika | यासा पनि नक्कली                                     | 2016 | संवाददाता           | Dolpa             |
| Nayapatrika | यासागुम्बा टिप्न तछ्छाड मछ्छाड                      | 2016 | रासस फोटो           | Dolpa             |
| Nayapatrika | रुकुमको यासा स्टोरी                                 | 2016 | संवाददाता           | Rukum             |
| Nayapatrika | रुकुम बाट ४० करोडको यासा निकासी राजश्व ६ लाख मात्रै | 2016 | योगेश ढकाल फिचर     | Rukum (Kathmandu) |
| Nayapatrika | बझाङ बासी यासा संकलन गर्न लेकतीर                    | 2017 | सम्राट सिंह फोटो    | Bajhang           |
| Nayapatrika | यासागुम्बा संकलन इजाजत जांच                         | 2017 | राम चन्द्र न्यौपाने | Dolpa             |
| Nayapatrika | यासा पाटनमा कांग्रेस एमाले झडप , चार घाइते          | 2017 | राम चन्द्र न्यौपाने | Dolpa             |
| Nayapatrika | संकटमा यासागुम्बा                                   | 2017 | परायण पोखेल         | Kathmandu         |
| Nayapatrika | मनाङ्ग लेकमा यासा खोज्नको भिड                       | 2017 | नविन राज कुइकेल     | Manang            |

|             |                                                          |      |                        |              |
|-------------|----------------------------------------------------------|------|------------------------|--------------|
| Nayapatrika | मनाङ्ग क लेकमा यासागुम्बा टिप्नेको भिड                   | 2017 | शान्त कमली             | Manang       |
| Nayapatrika | आज देखि यासा टिप्न सुरु                                  | 2017 | मनिष खड्का             | Rukum (East) |
| Nayapatrika | मतदाता सबै यासा टिप्न बुकिमा कसलाई दिने मत दाता शिक्षा ? | 2017 | मनिष खड्का             | Rukum (East) |
| Nayapatrika | अरबौको यासागुम्बा अबैध रुपमा विदेश निकासी हुदै           | 2017 | बिरेन्द्र ओली          | Kathmandu    |
| Nayapatrika | डोल्पामा यासागुम्बाको कुम्भ मेला                         | 2017 | रामचन्द्र न्यौपाने     | Dolpa        |
| Nayapatrika | विद्यालय भवन निर्माणको रकम यासा ब्यापारमा                | 2018 | रामचन्द्र न्यौपाने     | Dolpa        |
| Nayapatrika | यासा संकलनकालागि विद्यार्थी लेकतिर                       | 2018 | मान दत्त रावल          | Jumla        |
| Nayapatrika | प्रि महसुलमा अधिक वर्ष यासा संकलनमा सकाए                 | 2018 | समाचारदाता             | Kathmandu    |
| Nayapatrika | यासा टिप्ने बाट ६१ लाख संकलन                             | 2018 | अच्युत भण्डारी         | Mugu         |
| Nayapatrika | जेठ पहिलो साताबाट यासा संकलन खुला                        | 2018 | मनिष खड्का             | Rukum (East) |
| Nayapatrika | गाउँ शुन्य पारेर यासागुम्बा टिप्न लेकतिर                 | 2019 | सम्राट सिंह            | Bajhang      |
| Nayapatrika | यासागुम्बा नपाउँदा संकलक निराश                           | 2019 | नयाँ पत्रका सम्बाददाता | Darchula     |
| Nayapatrika | मृत्यु यासा र सत्ता                                      | 2019 | टासी टेवा              | Kathmandu    |
| Nayapatrika | फोकसुंदो यार्चा                                          | 2019 | भुपिन                  | Kathmandu    |
| Nayapatrika | नेकपा नेताको यासागुम्बाको व्यवसायिक खेती                 | 2019 | नयाँ पत्रका सम्बाददाता | Kathmandu    |
| Nayapatrika | मनाङमा यासा संकलन घट्यो                                  | 2019 | शान्ता कमली            | Lamjung      |
| Nayapatrika | यासा टिप्नेबाट साढे ९० लाख राजश्व                        | 2019 | अच्युतराज भण्डारी      | Mugu         |

|             |                                                              |      |                    |              |
|-------------|--------------------------------------------------------------|------|--------------------|--------------|
| Nayapatrika | रुकुम पूर्वमा यासा टिप्न खुला                                | 2019 | मनिष खड्का         | Rukum (East) |
| Nayapatrika | यासा टिप्न जाने एकको लेक लगेर मृत्यु                         | 2019 | समाचार दाता        | Rukum (West) |
| Nayapatrika | यासा गुम्बा टिप्न १३ जेठ देखी यासापाटन खुल्ने                | 2019 | रामचन्द्र न्यौपाने | Dolpa        |
| Nayapatrika | १३ यासागुम्बा संकलक पक्राउ                                   | 2019 | रामचन्द्र न्यौपाने | Dolpa        |
| Nayapatrika | यासा टिप्न डोल्पाको पाटन पुगे आठ हजार                        | 2019 | रामचन्द्र न्यौपाने | Dolpa        |
| Nayapatrika | यासागुम्बाको शुल्कबाट चल्दै आएको विद्यालय बन्द हुने अवस्थामा | 2019 | रामचन्द्र न्यौपाने | Dolpa        |
| Nayapatrika | यासागुम्बा टिप्न गएकाहरु रिक्तो हात फर्के                    | 2019 | हेमन्त केसी        | Jajarkot     |
| Nayapatrika | मुगुमा १५ जेठदेखि यासा संकलन खुला गरिने                      | 2019 | अच्युतराज भण्डारी  | Mugu         |
| Nayapatrika | यासा गुम्बा टिप्न विद्यालय बन्द                              | 2019 | मनिष खड्का         | Rukum        |
| Nayapatrika | यासा टिप्न गएका व्यक्तिहरु धमाधम बिरामी पर्दै                | 2019 | मनिष खड्का         | Rukum (East) |
| Nayapatrika | डोल्पाका सामुदायिक वनमापनि यासा संकलनमा रोक                  | 2020 | रामचन्द्र न्यौपाने | Dolpa        |
| Nayapatrika | यासागुम्बा नपाउँदा संकलक निराश                               | 2021 | नयाँपत्रिका        | Darchula     |
| Nayapatrika | यस वर्ष पनि नखुल्ने भयो यासा पाटन                            | 2021 | रामचन्द्र न्यौपाने | Dolpa        |
| Nayapatrika | डोल्पा र मुगुका १६ नाकाबाट यासा संकलन गर्न पुर्जी वितरण      | 2021 | रामचन्द्र न्यौपाने | Dolpa        |

|             |                                                                      |      |                         |                 |
|-------------|----------------------------------------------------------------------|------|-------------------------|-----------------|
| Nayapatrika | डोल्पामा यासा टिप्न पाटन पुगेका युवाको लेक लागेर मृत्यु              | 2021 | रामचन्द्र न्यौपाने      | Dolpa           |
| Nayapatrika | डोल्पामा यासागुम्बा संकलन गर्न अवैध रूपमा प्रवेश गरेका १३ जना पक्राउ | 2021 | रामचन्द्र न्यौपाने      | Dolpa           |
| Nayapatrika | यासा टिप्न पाटन पुगेका एक युवाको मृत्यु                              | 2021 | रामचन्द्र न्यौपाने      | Dolpa           |
| Nayapatrika | यासा टिप्न प्रतिबन्धपछि डोल्पाली चिन्तामा                            | 2021 | रामचन्द्र न्यौपाने      | Dolpa           |
| Nayapatrika | लुकीछिपी यासागुम्बा संकलन गरिरहेको अवस्थामा दुईजना पक्राउ            | 2021 | नयाँपत्रिका             | Dolpa           |
| Nayapatrika | स्थानीय सरकारले उठाउन सकेन यासागुम्बाको राजस्व                       | 2021 | मनिष खड्का              | Rukum (East)    |
| Nayapatrika | यासा टिप्न प्रतिबन्ध पछि डोल्पाली चिन्तामा                           | 2020 | रामचन्द्र न्यौपाने      | Dolpa           |
| Nayapatrika | डोल्पाका सामुदायिक वनमा यासा संकलनमा रोक                             | 2020 | रामचन्द्र न्यौपाने      | Dolpa           |
| Nayapatrika | मनाङमा पहिलोपटक यासागुम्बा टिप्न प्रतिबन्ध                           | 2020 | शान्ता कमली             | Lamjung         |
| Nayapatrika | भारतबाट फर्केकाहरु यासा टिप्न सिधै लेकतीर (फोटोफिचर)                 | 2021 | डी.वी. विष्ट            | Bajhang         |
| Nayapatrika | झण्डै दुई किलो यासागुम्बासहित चारजना पक्राउ                          | 2021 | नयाँ पत्रिका सम्बाददाता | Kathmandu       |
| Nayapatrika | हामी यासागुम्बाका झुसिलकिरा                                          | 2021 | डा. मित्र परियार        | Kathmandu       |
| Rajdhani    | यासाबाट राजस्वमा भारी गिरावट                                         | 2012 | रासस                    | Bajhang         |
| Rajdhani    | यासा टिप्न गएका रुकुमेली रिउँ फिर्ता                                 | 2012 | लक्ष्मण के.सी           | Rukum           |
| Rajdhani    | यासागुम्बा टिप्न गएका युवको लेक लागेर मृत्यु                         | 2013 | रास                     | Dolpa and Rukum |

|          |                                                                                |      |                  |                      |
|----------|--------------------------------------------------------------------------------|------|------------------|----------------------|
| Rajdhani | याचागुम्बु खोज्न हजारौको ताँती                                                 | 2013 | बिमल हमाल        | Mugu                 |
| Rajdhani | याचागुम्बुले रितिदै वस्ती                                                      | 2013 | रास              | Rukum                |
| Rajdhani | याचा टिप्न सुरु                                                                | 2013 | रास              | Rukum                |
| Rajdhani | यासागुम्बु टिप्न चहलपहल शुरु                                                   | 2013 | रास              | Rukum                |
| Rajdhani | विद्यार्थी याचा टिप्न हिँडेपछि दर्जनौ विद्यालय बन्द                            | 2014 | दीपक ओली         | Bajhang              |
| Rajdhani | गाँउलेको याचा विकेन                                                            | 2014 | रास              | Bajhang              |
| Rajdhani | पैसा टिप्न हत्केलामा ज्यान                                                     | 2014 | जनक खड्का        | Bajhang              |
| Rajdhani | याचागुम्बु माथि चलचित्र                                                        | 2014 | रास              | Kathmandu            |
| Rajdhani | स्थानिय वस्तुको महंगी बढाउँदै यासागुम्बु                                       | 2014 | बिमल हमाल        | Mugu                 |
| Rajdhani | मुगु को सिरानी चौर मा यासा गुम्बु खोज्न जादै गरेका सर्व साधारण को भिड          | 2014 | बिमल हमाल फोटो   | Mugu                 |
| Rajdhani | यासागुम्बा संकलक ऋण बोकेर घरतर्फ                                               | 2015 | रासस             | Dolpa                |
| Rajdhani | डोल्पामा यासा संकलन गर्न जादै संकलकहरु                                         | 2015 | रासस फोटो        | Dolpa                |
| Rajdhani | गाँउ नै खाली गरेर याचा खोज्न                                                   | 2015 | राजेन्द्र कार्की | Jajarkot             |
| Rajdhani | यासा संकलन मा रोक अटेर गरे ५० हजार जरिवाना                                     | 2016 | जनक खड्का        | Bajhang              |
| Rajdhani | यासागुम्बा बाट एक करोड                                                         | 2016 | रासस             | Bajhang and Darchula |
| Rajdhani | यासागुम्बा याम सुरु विद्यालयमा विद्यार्थी उपस्थिति घट्दो                       | 2016 | रासस             | Dolpa                |
| Rajdhani | हतियारधारी समूहद्वारा यासा सकलक माथि आक्रमण                                    | 2016 | बिमल हमाल        | Mugu                 |
| Rajdhani | यासको कर ७५ लाख असुली                                                          | 2016 | बिमल हमाल        | Mugu                 |
| Rajdhani | पुपाल यासा महोस्तव सुरु रन्मामैकोट                                             | 2016 | रासस             | Rukum                |
| Rajdhani | रुकुमको बिकट क्षेत्र पुपाल लेकमा बन्दुक पड्काए पछि यासा टिप्न दौडदै संकलनकर्ता | 2016 | रासस फोटो        | Rukum                |
| Rajdhani | यासले जीवन फेरिदै, पाटन रितिदै                                                 | 2017 | बिमल हमाल        | Mugu                 |
| Rajdhani | यासागुम्बा सुन्कलन गर्ने मौसम सुरु ...                                         | 2017 | रासस फोटो        | Dolpa                |

|          |                                                          |      |                 |               |
|----------|----------------------------------------------------------|------|-----------------|---------------|
| Rajdhani | यासाँ संकलन पाटन सुनसान बन्दै                            | 2018 | नरेन्द्र कार्की | Darchula      |
| Rajdhani | यासाँ गुम्बा संकलन अनुमति माग                            | 2018 | समाचारदाता      | Darchula      |
| Rajdhani | यासाँ खोज्दै विद्यार्थी पाटन तिर                         | 2018 | सरोज थापा       | Dolpa         |
| Rajdhani | जता विद्यार्थी उतै विद्यालय                              | 2018 | सरोज थापा       | Dolpa         |
| Rajdhani | यासाँ संकलनहरु आन्योलमा                                  | 2018 | सरोज थापा       | Dolpa         |
| Rajdhani | यासाँ संकलन बाटै सातामा ७०<br>लाख राजस्व                 | 2018 | सरोज थापा       | Dolpa         |
| Rajdhani | यासाँगुम्बा संकलन गर्नेको घुइचो                          | 2018 | सरोज थापा       | Dolpa         |
| Rajdhani | यासाँगुम्बा विचौलियालाई दुइगुना<br>सम्म नाफा             | 2018 | सरोज थापा       | Dolpa         |
| Rajdhani | यासाँले टिकेको छ घर खर्च                                 | 2018 | सरोज थापा       | Dolpa         |
| Rajdhani | विद्यालय भवन निर्माण को रकम<br>यासाँ व्यापारमा           | 2018 | सरोज थापा       | Dolpa         |
| Rajdhani | यासाँगुम्बा संकलनको हत्या                                | 2018 | समाचारदाता      | Dolpa         |
| Rajdhani | यासाँ संकलन यममा विद्यालय बन्द                           | 2018 | समाचारदाता      | Rukum (East)  |
| Rajdhani | यासाँ संकलनमा बाजिएको विवाद<br>मिल्यो                    | 2019 | डीबी बिष्ट      | Bajhang       |
| Rajdhani | यासाँले गाउ नै सुनसान                                    | 2019 | डीबी बिष्ट      | Bajhang       |
| Rajdhani | बिक्रनै छाड्यो यासाँ गुम्बा                              | 2019 | डीबी बिष्ट      | Bajhang       |
| Rajdhani | यासाँगुम्बा संकलन गर्दा १००<br>जनालाई अनुमति             | 2019 | भविन कार्की     | Sankhuwasabha |
| Rajdhani | 'यासाँगुम्बा सङ्कलनमा रोक<br>लगाइयो, घर खर्च कसरी धान्ने | 2020 | सुशील बि क      | Kathmandu     |
| Rajdhani | भारतबाट फर्केकाहरु यासाँ टिप्न<br>सिधै लेकतीर (फोटोफिचर) | 2021 | डी.वी. बिष्ट    | Bajhang       |

|          |                                                            |      |                           |                        |
|----------|------------------------------------------------------------|------|---------------------------|------------------------|
| Rajdhani | लेकाली भेगमा हिमपात यासां संकलन गाउ फेर्किदै               | 2021 | डीबी बिष्ट                | Bajhang                |
| Rajdhani | यासां र जडिबुटी खोजिद्वारा व्यापक बन फडानी                 | 2021 | डीबी बिष्ट                | Bajhang                |
| Rajdhani | बझाङमा यासां सङ्कलन गर्ना जाने क्रम बढे                    | 2021 | डीबी बिष्ट                | Bajhang                |
| Rajdhani | मौसम यासांगुम्बाको                                         | 2008 | गोर्कणप्रसाद उपाध्याय फिच | Bajura                 |
| Rajdhani | विद्यालय बन्द गरी विद्यार्थी याचांगुम्बा खोज्न डोल्पातिर   | 2008 | राजेन्द्र कार्की          | Jajarkot               |
| Rajdhani | याचांगुम्बा टिप्न हिमालतिर                                 | 2008 | रास                       | Lamjung- Manang        |
| Rajdhani | मनाङका लेकमा यासांगुम्बा संकलन गर्नेको भीड                 | 2008 | रास                       | Lamjung- Manang        |
| Rajdhani | यासांगुम्बा टिप्नेको भीड                                   | 2008 | रास                       | Myagdi                 |
| Rajdhani | यासांगुम्बाट एक करोडको आम्दानी                             | 2008 | रासस                      | Myagdi                 |
| Rajdhani | यासांगुम्बा खोज्न हिमाल जाने क्रम शुरु                     | 2008 | रास                       | Myagdi                 |
| Rajdhani | यासांगुम्बाट संकलक घटे                                     | 2009 | जनक खड्का                 | Bajhang                |
| Rajdhani | याचांगुम्बु किन्ने व्यापारी आएनन                           | 2009 | जनक खड्का                 | Bajhang                |
| Rajdhani | याचांगुम्बु संकलन गर्न भीड                                 | 2009 | यशोदा नेपाल               | Dhangadhi              |
| Rajdhani | लेकतिर याचांगुम्बा टिप्नेको भीड र गुल्मीमा पनि यासांगुम्बा | 2009 | राजेन्द्र कार्की र रास    | Jajarkot               |
| Rajdhani | यासांगुम्बाट खोज्न हिमालतिर                                | 2009 | आशा गुरुङ प्रतिक          | Lamjung, Tanahu, Kaski |
| Rajdhani | याचां टिप्न गएका नौ गोर्खालीको हत्या                       | 2009 | रामकृष्ण ज्ञवाली          | Manang                 |
| Rajdhani | याचांगुम्बु संकलकको संख्या घट्यो                           | 2009 | टीका विष्ट                | Rukum                  |
| Rajdhani | पहिला याचांगुम्बा त्यसपछि स्कुल                            | 2010 | जनक खड्का                 | Bajhang                |
| Rajdhani | मनाङमा यासांगुम्बा टिप्ने काम सुरु                         | 2010 | आसा गुरुङ                 | Lamjung- Manang        |
| Rajdhani | मनाङवासीलाई मात्र याचांगुम्बा टिप्न दिइने                  | 2010 | परशुराम काफ्ले            | Manang                 |
| Rajdhani | याचांगुम्बा संकलनमा रोक                                    | 2010 | अगन्धर तिवारी             | Myagdi                 |
| Rajdhani | याचांगुम्बु संकलन अलपत्र                                   | 2011 | जनक खड्का                 | Bajhang                |
| Rajdhani | याचां संकलनमा गएका ६ जनाको मृत्यु                          | 2011 | रास                       | Bajhang                |
| Rajdhani | सरकारी अनुपस्थितिले याचांगुम्बुको चोरी निकासी बढ्दो        | 2011 | जनक खड्का                 | Bajhang                |
| Rajdhani | याचांगुम्बुको यथार्थ                                       | 2011 | धोगेन्द्र बहादुर शाही लेख | Dolpa and Kathmandu    |

|          |                                                               |      |                  |           |
|----------|---------------------------------------------------------------|------|------------------|-----------|
| Rajdhani | गाँउलेहरु यार्चागुम्बु टिप्न जाँदा नामावली संकलनमा समस्या     | 2011 | राजेन्द्र कार्की | Jajarkot  |
| Rajdhani | मौसम यार्चागुम्बुको                                           | 2011 | आश गुरुङ फिचर    | Manang    |
| Rajdhani | पढाइ छाडेर यार्चागुम्बु टिप्न                                 | 2011 | विमल हमाल        | Mugu      |
| Rajdhani | यार्चागुम्बु टिप्न गएका चार वेपत्ता                           | 2011 | रास              | Mugu      |
| Rajdhani | यार्चागुम्बु टिप्न हिँडेपछि पठन पाठन प्रभावित                 | 2011 | अगन्धर तिवारी    | Myagdi    |
| Rajdhani | शिक्षक विद्यार्थी यार्सागुम्बा टिप्न हिँडेपछि विद्यालय सुनसान | 2011 | लक्ष्मण केसी     | Rukum     |
| Rajdhani | यार्चागुम्बु लुट्न जाने पेस्तोल सहित पक्राउ                   | 2011 | लक्ष्मण केसी     | Rukum     |
| Rajdhani | यार्सागुम्बा टिप्ने लेकमा प्रहरीले गस्ती गर्ने                | 2012 | आश गुरुङ         | Lamjung   |
| Rajdhani | प्रतिकेजी यार्साको २४ लाख                                     | 2012 | रासस             | Rukum     |
| Rajdhani | यार्सा टिप्न पुपालमा पाल टाँगेर बसेका सर्वसाधारण              | 2012 | रासस फोटो        | Rukum     |
| Rajdhani | नेपालमा जडिबुटीको सम्भावना                                    | 2019 | कुमार रावत       | Kathmandu |
|          |                                                               |      |                  |           |
