# Supplementary material for: Communicating conservation: how do the Nepalese print media portray caterpillar fungus? An analysis of newspaper coverage from 2008–2021
Source: PubMed Central journal article supplement — Heliyon. 2022 Aug 27;8(9):e10439. doi: 10.1016/j.heliyon.2022.e10439 (PMC9437801; doi:10.1016/j.heliyon.2022.e10439), 2022-08-27
Supplement: mmc3.pdf [file mmc3.pdf]

## Supplementary Material C

| Year/Theme         | 2065       | 2066       | 2067       | 2068       | 2069       | 2070       | 2071       | 2072       | 2073       | 2074       | 2075       | 2076       | 2077       | 2078       | Total       |
|--------------------|------------|------------|------------|------------|------------|------------|------------|------------|------------|------------|------------|------------|------------|------------|-------------|
| Challenges         | 15         | 12         | 7          | 19         | 14         | 9          | 37         | 18         | 27         | 14         | 13         | 13         | 9          | 14         | 221         |
| Gap                | 10         | 10         | 4          | 8          | 8          | 8          | 24         | 14         | 13         | 7          | 14         | 19         | 4          | 7          | 150         |
| Governance         | 39         | 28         | 26         | 26         | 38         | 38         | 77         | 53         | 43         | 51         | 14         | 34         | 21         | 49         | 537         |
| Harvesting         | 32         | 20         | 23         | 45         | 42         | 36         | 75         | 56         | 46         | 52         | 51         | 27         | 5          | 21         | 531         |
| Impacts            | 50         | 53         | 41         | 97         | 72         | 75         | 166        | 82         | 76         | 79         | 107        | 74         | 21         | 59         | 1052        |
| Information        | 45         | 28         | 25         | 36         | 52         | 39         | 76         | 51         | 47         | 46         | 49         | 32         | 24         | 30         | 580         |
| Response           | 10         | 2          | 2          | 9          | 6          | 8          | 20         | 11         | 19         | 8          | 2          | 4          | 7          | 12         | 120         |
| Trade              | 48         | 29         | 20         | 53         | 70         | 71         | 89         | 52         | 54         | 41         | 10         | 22         | 18         | 9          | 586         |
| <b>Grand Total</b> | <b>249</b> | <b>182</b> | <b>148</b> | <b>293</b> | <b>302</b> | <b>284</b> | <b>564</b> | <b>337</b> | <b>325</b> | <b>298</b> | <b>260</b> | <b>225</b> | <b>109</b> | <b>201</b> | <b>3777</b> |

| <b>SN</b> | <b>Newspaper</b> | <b>Code</b> |
|-----------|------------------|-------------|
| 1         | Annapurna Post   | AP          |
| 2         | Gorkhapatra      | GKP         |
| 3         | Kantipur         | KP          |
| 4         | Karobar          | KA          |
| 5         | Nagarik          | NAG         |
| 6         | Naya Patrika     | Naya        |
| 7         | Rajdhani         | RAJ         |

| <b>Year Conversion</b> |                     |
|------------------------|---------------------|
| <b>Nepali year</b>     | <b>English year</b> |
| 2065                   | 2008                |
| 2066                   | 2009                |
| 2067                   | 2010                |
| 2068                   | 2011                |
| 2069                   | 2012                |
| 2070                   | 2013                |
| 2071                   | 2014                |
| 2072                   | 2015                |
| 2073                   | 2016                |
| 2074                   | 2017                |
| 2075                   | 2018                |
| 2076                   | 2019                |
| 2077                   | 2020                |
| 2078                   | 2021                |

| SN | Keywords/Key phrases                                                 | Tagging | Count | Year | Source(Newspaper) |
|----|----------------------------------------------------------------------|---------|-------|------|-------------------|
| 1  | Absence of caterpillar fungus harvesting guidelines/management plans | Gap     | 1     | 2071 | Nag               |
| 2  | Absence of caterpillar fungus harvesting guidelines/management plans | Gap     | 1     | 2071 | Nag               |
| 3  | Absence of caterpillar fungus harvesting guidelines/management plans | Gap     | 1     | 2067 | AP                |
| 4  | Absence of caterpillar fungus harvesting guidelines/management plans | Impacts | 1     | 2075 | Ka                |
| 5  | Absence of caterpillar fungus harvesting guidelines/management plans | Impacts | 1     | 2075 | Ka                |
| 6  | Absence of caterpillar fungus harvesting guidelines/management plans | Impacts | 1     | 2075 | Ka                |
| 7  | Absence of caterpillar fungus harvesting guidelines/management plans | Impacts | 1     | 2075 | Ka                |
| 8  | Absence of caterpillar fungus harvesting guidelines/management plans | Impacts | 1     | 2075 | Ka                |
| 9  | Absence of caterpillar fungus harvesting guidelines/management plans | Impacts | 1     | 2075 | Ka                |
| 10 | Absence of caterpillar fungus harvesting guidelines/management plans | Impacts | 1     | 2075 | Ka                |
| 11 | Absence of caterpillar fungus harvesting guidelines/management plans | Impacts | 1     | 2075 | Ka                |
| 12 | Absence of caterpillar fungus harvesting guidelines/management plans | Impacts | 1     | 2075 | Ka                |
| 13 | Absence of caterpillar fungus harvesting guidelines/management plans | Impacts | 1     | 2075 | Ka                |
| 14 | Absence of caterpillar fungus harvesting guidelines/management plans | Impacts | 1     | 2075 | Ka                |
| 15 | Absence of caterpillar fungus harvesting guidelines/management plans | Impacts | 1     | 2077 | Ka                |

|    |                                                                                       |            |   |      |      |
|----|---------------------------------------------------------------------------------------|------------|---|------|------|
| 16 | Absence of caterpillar fungus harvesting guidelines/management plans                  | Impacts    | 1 | 2078 | Nag  |
| 17 | Absence of caterpillar fungus harvesting guidelines/management plans                  | Impacts    | 1 | 2078 | Nag  |
| 18 | Absence of caterpillar fungus harvesting guidelines/management plans                  | Impacts    | 1 | 2078 | Nag  |
| 19 | Absence of caterpillar fungus harvesting guidelines/management plans                  | Impacts    | 1 | 2078 | Nag  |
| 20 | Absence of caterpillar fungus harvesting guidelines/management plans                  | Impacts    | 1 | 2078 | Nag  |
| 21 | Absence of caterpillar fungus harvesting guidelines/management plans                  | Impacts    | 1 | 2074 | Naya |
| 22 | Absence of caterpillar fungus harvesting guidelines/management plans                  | Impacts    | 1 | 2076 | Naya |
| 23 | Absence of caterpillar fungus harvesting guidelines/management plans                  | Impacts    | 1 | 2076 | Naya |
| 24 | Absence of health facilities in the pasture                                           | Challenges | 1 | 2066 | Nag  |
| 25 | Absence of health facilities in the pasture                                           | Challenges | 1 | 2071 | Nag  |
| 26 | Absence of health facilities in the pasture                                           | Challenges | 1 | 2065 | KP   |
| 27 | Absence of health facilities in the pasture                                           | Challenges | 1 | 2071 | KP   |
| 28 | Absence of health facilities in the pasture                                           | Challenges | 1 | 2074 | KP   |
| 29 | Absence of health facilities in the pasture                                           | Challenges | 1 | 2077 | Ka   |
| 30 | Absence of health facilities in the pasture                                           | Challenges | 1 | 2077 | Ka   |
| 31 | Absence of health facilities in the pasture                                           | Challenges | 1 | 2077 | Ka   |
| 32 | Absence of health facilities in the pasture                                           | Challenges | 1 | 2076 | Naya |
| 33 | Absence of health facilities in the pasture                                           | Challenges | 1 | 2078 | Naya |
| 34 | Absence of health facilities in the pasture                                           | Challenges | 1 | 2078 | Naya |
| 35 | Absence of state mechanism (customs, administrative office, security) in the pastures | Gap        | 1 | 2071 | Ka   |
| 36 | Absence of state mechanism (customs, administrative office, security) in the pastures | Gap        | 1 | 2065 | GKP  |

|    |                                                                                       |             |   |      |      |
|----|---------------------------------------------------------------------------------------|-------------|---|------|------|
| 37 | Absence of state mechanism (customs, administrative office, security) in the pastures | Gap         | 1 | 2065 | GKP  |
| 38 | Absence of state mechanism (customs, administrative office, security) in the pastures | Gap         | 1 | 2066 | GKP  |
| 39 | Absence of state mechanism (customs, administrative office, security) in the pastures | Gap         | 1 | 2071 | Nag  |
| 40 | Absence of state mechanism (customs, administrative office, security) in the pastures | Gap         | 1 | 2073 | Nag  |
| 41 | Absence of state mechanism (customs, administrative office, security) in the pastures | Gap         | 1 | 2077 | Ka   |
| 42 | Activities of caterpillar fungus management committee reported                        | Governance  | 1 | 2071 | Raj  |
| 43 | Auction of caterpillar fungus by local institutions                                   | Governance  | 1 | 2065 | Raj  |
| 44 | Auction of caterpillar fungus by local institutions                                   | Governance  | 1 | 2070 | KP   |
| 45 | Authorities requests to possess collection permit with the harvesters                 | Governance  | 1 | 2077 | Ka   |
| 46 | Authorities requests to possess collection permit with the harvesters                 | Governance  | 1 | 2077 | Ka   |
| 47 | Authorities requests to possess collection permit with the harvesters                 | Governance  | 1 | 2075 | GKP  |
| 48 | Availability of caterpillar fungus in low altitude and new places                     | Information | 1 | 2076 | AP   |
| 49 | Availability of health facilities in the pasture                                      | Response    | 1 | 2069 | KP   |
| 50 | Availability of health facilities in the pasture                                      | Response    | 1 | 2072 | Naya |
| 51 | Availability of health facilities in the pasture                                      | Response    | 1 | 2077 | Ka   |
| 52 | Availability of health facilities in the pasture                                      | Response    | 1 | 2077 | Ka   |
| 53 | Availability of health facilities in the pasture                                      | Response    | 1 | 2077 | Ka   |
| 54 | Availability of health facilities in the pasture                                      | Response    | 1 | 2077 | Ka   |
| 55 | Availability of health facilities in the pasture                                      | Response    | 1 | 2078 | Naya |
| 56 | Availability of health facilities in the pasture (First aid team)                     | Response    | 1 | 2070 | KP   |
| 57 | Availability of health facilities in the pasture (First aid team)                     | Response    | 1 | 2065 | AP   |
| 58 | Availability of health facilities in the pasture                                      | Response    | 1 | 2076 | Naya |
| 59 | Availability of health facilities in the pasture                                      | Response    | 1 | 2078 | Naya |
| 60 | Availability of caterpillar fungus in low altitude and new places                     | Information | 1 | 2071 | AP   |
| 61 | Availability of caterpillar fungus in low altitude and new places                     | Information | 1 | 2068 | GKP  |
| 62 | Availability of caterpillar fungus in low altitude and new places                     | Information | 1 | 2068 | GKP  |

|    |                                                                   |             |   |      |      |
|----|-------------------------------------------------------------------|-------------|---|------|------|
| 63 | Availability of caterpillar fungus in low altitude and new places | Information | 1 | 2070 | GKP  |
| 64 | Availability of caterpillar fungus in low altitude and new places | Information | 1 | 2065 | KP   |
| 65 | Availability of caterpillar fungus in low altitude and new places | Information | 1 | 2071 | KP   |
| 66 | Availability of caterpillar fungus in low altitude and new places | Information | 1 | 2071 | KP   |
| 67 | Availability of caterpillar fungus in low altitude and new places | Information | 1 | 2065 | KP   |
| 68 | Availability of caterpillar fungus in low altitude and new places | Information | 1 | 2065 | GKP  |
| 69 | Availability of caterpillar fungus in low altitude and new places | Information | 1 | 2065 | Raj  |
| 70 | Availability of caterpillar fungus in low altitude and new places | Information | 1 | 2072 | KP   |
| 71 | Availability of caterpillar fungus in low altitude and new places | Information | 1 | 2069 | KP   |
| 72 | Availability of caterpillar fungus in low altitude and new places | Information | 1 | 2066 | Raj  |
| 73 | Availability of caterpillar fungus in low altitude and new places | Information | 1 | 2072 | KP   |
| 74 | Availability of caterpillar fungus in low altitude and new places | Information | 1 | 2077 | Ka   |
| 75 | Better management of the caterpillar fungus                       | Governance  | 1 | 2065 | Naya |
| 76 | Better management of the caterpillar fungus                       | Governance  | 1 | 2078 | Ka   |
| 77 | Better management of the caterpillar fungus                       | Governance  | 1 | 2078 | Ka   |
| 78 | Better management of the caterpillar fungus                       | Governance  | 1 | 2078 | Ka   |
| 79 | Better management of the caterpillar fungus                       | Governance  | 1 | 2078 | Ka   |
| 80 | Better management of the caterpillar fungus                       | Governance  | 1 | 2078 | Ka   |
| 81 | Better management of the caterpillar fungus                       | Governance  | 1 | 2078 | Ka   |
| 82 | Better management of the caterpillar fungus                       | Governance  | 1 | 2078 | Ka   |
| 83 | Better management of the caterpillar fungus                       | Governance  | 1 | 2078 | Ka   |
| 84 | Better management of the caterpillar fungus                       | Governance  | 1 | 2078 | Ka   |
| 85 | Better management of the caterpillar fungus                       | Governance  | 1 | 2078 | Ka   |
| 86 | Better management of the caterpillar fungus                       | Governance  | 1 | 2078 | Ka   |
| 87 | Better management of the caterpillar fungus                       | Governance  | 1 | 2078 | Ka   |
| 88 | Better management of the caterpillar fungus                       | Governance  | 1 | 2078 | Ka   |
| 89 | Better management of the caterpillar fungus                       | Governance  | 1 | 2078 | Ka   |
| 90 | Better management of the caterpillar fungus                       | Governance  | 1 | 2078 | Ka   |
| 91 | Better management of the caterpillar fungus                       | Governance  | 1 | 2075 | NAG  |
| 92 | Better management of the caterpillar fungus                       | Governance  | 1 | 2075 | NAG  |
| 93 | Better revenue distribution mechanism for the caterpillar fungus  | Gap         | 1 | 2072 | KP   |

|     |                                                                  |             |   |      |      |
|-----|------------------------------------------------------------------|-------------|---|------|------|
| 94  | Better revenue distribution mechanism for the caterpillar fungus | Gap         | 1 | 2075 | NAG  |
| 95  | Better revenue distribution mechanism for the caterpillar fungus | Gap         | 1 | 2075 | NAG  |
| 96  | Better revenue distribution mechanism for the caterpillar fungus | Gap         | 1 | 2075 | NAG  |
| 97  | Better revenue distribution mechanism for the caterpillar fungus | Gap         | 1 | 2075 | NAG  |
| 98  | Better revenue distribution mechanism for the caterpillar fungus | Gap         | 1 | 2075 | NAG  |
| 99  | Better revenue distribution mechanism for the caterpillar fungus | Gap         | 1 | 2075 | NAG  |
| 100 | Better revenue distribution mechanism for the caterpillar fungus | Gap         | 1 | 2075 | NAG  |
| 101 | Border closure disrupting export of caterpillar fungus           | Trade       | 1 | 2073 | AP   |
| 102 | Border points open to export caterpillar fungus                  | Trade       | 1 | 2073 | KP   |
| 103 | Call for caterpillar fungus tender                               | Governance  | 1 | 2073 | Naya |
| 104 | Case of sustainable management of caterpillar fungus (Bhutan)    | Information | 1 | 2069 | KP   |
| 105 | Caterpillar fungus as a status symbol in China                   | Information | 1 | 2074 | KP   |
| 106 | Caterpillar fungus availability to days in ratio reported        | Harvesting  | 1 | 2073 | Naya |
| 107 | Caterpillar fungus availability to days in ratio reported        | Harvesting  | 1 | 2073 | Raj  |
| 108 | Caterpillar fungus availability to days in ratio reported        | Harvesting  | 1 | 2072 | KP   |
| 109 | Caterpillar fungus availability to days in ratio reported        | Harvesting  | 1 | 2069 | KP   |
| 110 | Caterpillar fungus availability to days in ratio reported        | Harvesting  | 1 | 2068 | Nag  |
| 111 | Caterpillar fungus availability to days in ratio reported        | Harvesting  | 1 | 2074 | KP   |
| 112 | Caterpillar fungus availability to days in ratio reported        | Harvesting  | 1 | 2069 | AP   |
| 113 | Caterpillar fungus availability to days in ratio reported        | Harvesting  | 1 | 2066 | AP   |
| 114 | Caterpillar fungus availability to days in ratio reported        | Harvesting  | 1 | 2072 | KP   |
| 115 | Caterpillar fungus availability to days in ratio reported        | Harvesting  | 1 | 2073 | GKP  |
| 116 | Caterpillar fungus availability to days in ratio reported        | Harvesting  | 1 | 2072 | KP   |
| 117 | Caterpillar fungus bartered (exchanged) with food                | Trade       | 1 | 2073 | Naya |
| 118 | Caterpillar fungus collection affected (due to COVID-19)         | Challenges  | 1 | 2075 | NAG  |
| 119 | Caterpillar fungus collection affected (due to disaster)         | Challenges  | 1 | 2073 | GKP  |
| 120 | Caterpillar fungus collection affected (due to election) new     | Challenges  | 1 | 2074 | Naya |
| 121 | Caterpillar fungus collection affected (due to election) new     | Challenges  | 1 | 2074 | Naya |
| 122 | Caterpillar fungus considered as Himalayan gold                  | Information | 1 | 2074 | Naya |
| 123 | Caterpillar fungus considered as Himalayan gold                  | Information | 1 | 2073 | Nag  |
| 124 | Caterpillar fungus considered as Himalayan gold                  | Information | 1 | 2075 | NAG  |

|     |                                                                 |             |   |      |      |
|-----|-----------------------------------------------------------------|-------------|---|------|------|
| 125 | Caterpillar fungus considered as Himalayan gold                 | Information | 1 | 2075 | NAG  |
| 126 | Caterpillar fungus considered as Himalayan gold                 | Information | 1 | 2076 | NAG  |
| 127 | Caterpillar fungus considered as Himalayan gold                 | Information | 1 | 2078 | Nag  |
| 128 | Caterpillar fungus directly traded to Tibet                     | Trade       | 1 | 2073 | KP   |
| 129 | Caterpillar fungus discovered by Tibetan refugees while rearing | Information | 1 | 2065 | Naya |
| 130 | Caterpillar fungus found in India with low quality              | Information | 1 | 2071 | AP   |
| 131 | Caterpillar fungus income used in unproductive way              | Harvesting  | 1 | 2065 | Naya |
| 132 | Caterpillar fungus management guidelines published              | Information | 1 | 2065 | KP   |
| 133 | Caterpillar fungus management linked with conservation          | Information | 1 | 2068 | Raj  |
| 134 | Caterpillar fungus management linked with conservation          | Information | 1 | 2078 | Naya |
| 135 | Caterpillar fungus management linked with conservation          | Information | 1 | 2075 | KP   |
| 136 | Caterpillar fungus popularity through sports                    | Information | 1 | 2070 | Raj  |
| 137 | Caterpillar fungus related festival                             | Impacts     | 1 | 2073 | AP   |
| 138 | Caterpillar fungus related festival                             | Impacts     | 1 | 2071 | Raj  |
| 139 | Caterpillar fungus related festival                             | Impacts     | 1 | 2070 | KP   |
| 140 | Caterpillar fungus related festival                             | Impacts     | 1 | 2070 | AP   |
| 141 | Caterpillar fungus shifting to higher altitude                  | Information | 1 | 2073 | AP   |
| 142 | Caterpillar fungus trade volume reported                        | Trade       | 1 | 2073 | KP   |
| 143 | Caterpillar fungus trade volume reported                        | Trade       | 1 | 2074 | GKP  |
| 144 | Caterpillar fungus trade volume reported                        | Trade       | 1 | 2074 | Naya |
| 145 | Caterpillar fungus trade volume reported                        | Trade       | 1 | 2068 | Nag  |
| 146 | Caterpillar fungus trade volume reported                        | Trade       | 1 | 2071 | Ka   |
| 147 | Caterpillar fungus trade volume reported                        | Trade       | 1 | 2071 | Ka   |
| 148 | Caterpillar fungus trade volume reported                        | Trade       | 1 | 2065 | KP   |
| 149 | Caterpillar fungus trade volume reported                        | Trade       | 1 | 2071 | Ka   |
| 150 | Caterpillar fungus trade volume reported                        | Trade       | 1 | 2065 | Naya |
| 151 | Caterpillar fungus trade volume reported                        | Trade       | 1 | 2065 | KP   |
| 152 | Caterpillar fungus trade volume reported                        | Trade       | 1 | 2065 | KP   |
| 153 | Caterpillar fungus trade volume reported                        | Trade       | 1 | 2065 | AP   |
| 154 | Caterpillar fungus trade volume reported                        | Trade       | 1 | 2073 | AP   |
| 155 | Caterpillar fungus trade volume reported                        | Trade       | 1 | 2070 | AP   |



|     |                                                     |       |   |      |     |
|-----|-----------------------------------------------------|-------|---|------|-----|
| 156 | Caterpillar fungus trade volume reported            | Trade | 1 | 2074 | GKP |
| 157 | Caterpillar fungus trade volume reported            | Trade | 1 | 2070 | KP  |
| 158 | Caterpillar fungus trade volume reported            | Trade | 1 | 2072 | KP  |
| 159 | Caterpillar fungus trade volume reported            | Trade | 1 | 2065 | Raj |
| 160 | Caterpillar fungus trade volume reported            | Trade | 1 | 2073 | AP  |
| 161 | Caterpillar fungus trade volume reported            | Trade | 1 | 2074 | AP  |
| 162 | Caterpillar fungus trade volume reported            | Trade | 1 | 2065 | GKP |
| 163 | Caterpillar fungus trade volume reported            | Trade | 1 | 2069 | GKP |
| 164 | Caterpillar fungus trade volume reported            | Trade | 1 | 2069 | GKP |
| 165 | Caterpillar fungus trade volume reported            | Trade | 1 | 2070 | GKP |
| 166 | Caterpillar fungus trade volume reported            | Trade | 1 | 2071 | Nag |
| 167 | Caterpillar fungus trade volume reported            | Trade | 1 | 2070 | KP  |
| 168 | Caterpillar fungus trade volume reported            | Trade | 1 | 2068 | Raj |
| 169 | Caterpillar fungus trade volume reported            | Trade | 1 | 2068 | Raj |
| 170 | Caterpillar fungus trade volume reported            | Trade | 1 | 2072 | Nag |
| 171 | Caterpillar fungus trade volume reported            | Trade | 1 | 2071 | KP  |
| 172 | Caterpillar fungus trade volume reported            | Trade | 1 | 2070 | KP  |
| 173 | Caterpillar fungus trade volume reported            | Trade | 1 | 2069 | KP  |
| 174 | Caterpillar fungus trade volume reported            | Trade | 1 | 2071 | Nag |
| 175 | Caterpillar fungus trade volume reported            | Trade | 1 | 2074 | KP  |
| 176 | Caterpillar fungus trade volume reported            | Trade | 1 | 2076 | NAG |
| 177 | Caterpillar fungus trade volume reported            | Trade | 1 | 2076 | NAG |
| 178 | Caterpillar fungus trade volume reported            | Trade | 1 | 2076 | NAG |
| 179 | Caterpillar fungus trade volume reported            | Trade | 1 | 2075 | AP  |
| 180 | Caterpillar fungus trade volume reported            | Trade | 1 | 2076 | AP  |
| 181 | Caterpillar fungus trade volume reported            | Trade | 1 | 2076 | AP  |
| 182 | Caterpillar fungus trade volume reported (expected) | Trade | 1 | 2074 | KP  |
| 183 | Caterpillar fungus trade volume reported (expected) | Trade | 1 | 2072 | KP  |
| 184 | Caterpillar fungus trade volume reported (expected) | Trade | 1 | 2070 | Ka  |
| 185 | Caterpillar fungus trade volume reported reported   | Trade | 1 | 2070 | Nag |
| 186 | Caterpillar fungus trade volume reported reported   | Trade | 1 | 2072 | KP  |

|     |                                                   |       |   |      |      |
|-----|---------------------------------------------------|-------|---|------|------|
| 187 | Caterpillar fungus trade volume reported reported | Trade | 1 | 2065 | Raj  |
| 188 | Caterpillar fungus trade volume reported reported | Trade | 1 | 2066 | Nag  |
| 189 | Caterpillar fungus trade volume reported reported | Trade | 1 | 2065 | AP   |
| 190 | Caterpillar fungus trade volume reported reported | Trade | 1 | 2066 | AP   |
| 191 | Caterpillar fungus trade volume reported reported | Trade | 1 | 2066 | Raj  |
| 192 | Caterpillar fungus trade volume reported reported | Trade | 1 | 2068 | Nag  |
| 193 | Caterpillar fungus trade volume reported reported | Trade | 1 | 2068 | Nag  |
| 194 | Caterpillar fungus trade volume reported reported | Trade | 1 | 2066 | Naya |
| 195 | Caterpillar fungus trade volume reported reported | Trade | 1 | 2069 | Nag  |
| 196 | Caterpillar fungus trade volume reported reported | Trade | 1 | 2066 | AP   |
| 197 | Caterpillar fungus trade volume reported reported | Trade | 1 | 2066 | AP   |
| 198 | Caterpillar fungus trade volume reported reported | Trade | 1 | 2068 | AP   |
| 199 | Caterpillar fungus trade volume reported reported | Trade | 1 | 2068 | AP   |
| 200 | Caterpillar fungus trade volume reported reported | Trade | 1 | 2069 | AP   |
| 201 | Caterpillar fungus trade volume reported reported | Trade | 1 | 2071 | AP   |
| 202 | Caterpillar fungus trade volume reported reported | Trade | 1 | 2071 | AP   |
| 203 | Caterpillar fungus trade volume reported reported | Trade | 1 | 2072 | AP   |
| 204 | Caterpillar fungus trade volume reported reported | Trade | 1 | 2065 | GKP  |
| 205 | Caterpillar fungus trade volume reported reported | Trade | 1 | 2066 | GKP  |
| 206 | Caterpillar fungus trade volume reported reported | Trade | 1 | 2066 | GKP  |
| 207 | Caterpillar fungus trade volume reported reported | Trade | 1 | 2067 | GKP  |
| 208 | Caterpillar fungus trade volume reported reported | Trade | 1 | 2068 | GKP  |
| 209 | Caterpillar fungus trade volume reported reported | Trade | 1 | 2068 | GKP  |
| 210 | Caterpillar fungus trade volume reported reported | Trade | 1 | 2068 | GKP  |
| 211 | Caterpillar fungus trade volume reported reported | Trade | 1 | 2069 | GKP  |
| 212 | Caterpillar fungus trade volume reported reported | Trade | 1 | 2070 | GKP  |
| 213 | Caterpillar fungus trade volume reported reported | Trade | 1 | 2072 | GKP  |
| 214 | Caterpillar fungus trade volume reported reported | Trade | 1 | 2074 | GKP  |
| 215 | Caterpillar fungus trade volume reported reported | Trade | 1 | 2074 | GKP  |
| 216 | Caterpillar fungus trade volume reported reported | Trade | 1 | 2069 | GKP  |
| 217 | Caterpillar fungus trade volume reported reported | Trade | 1 | 2074 | AP   |

|     |                                                                                           |          |   |      |     |
|-----|-------------------------------------------------------------------------------------------|----------|---|------|-----|
| 218 | Caterpillar fungus trade volume reported reported                                         | Trade    | 1 | 2071 | Nag |
| 219 | Caterpillar fungus trade volume reported reported                                         | Trade    | 1 | 2071 | Nag |
| 220 | Caterpillar fungus trade volume reported reported                                         | Trade    | 1 | 2071 | Nag |
| 221 | Caterpillar fungus transported via plane (illegally)                                      | Trade    | 1 | 2065 | AP  |
| 222 | Challenges of management of caterpillar fungus                                            | Gap      | 1 | 2065 | KP  |
| 223 | Challenges of management of caterpillar fungus                                            | Gap      | 1 | 2076 | NAG |
| 224 | Challenges of management of caterpillar fungus                                            | Gap      | 1 | 2076 | NAG |
| 225 | Challenges of management of caterpillar fungus                                            | Gap      | 1 | 2076 | NAG |
| 226 | Challenges to study caterpillar fungus                                                    | Gap      | 1 | 2072 | KP  |
| 227 | Challenges to study caterpillar fungus                                                    | Gap      | 1 | 2072 | KP  |
| 228 | Checkpost established to record data on trade                                             | Response | 1 | 2072 | KP  |
| 229 | Checkpost established to record data on trade                                             | Response | 1 | 2071 | Ka  |
| 230 | Closure of local institution (education, government, hotels) during the collection season | Impacts  | 1 | 2071 | Ka  |
| 231 | Closure of local institution (education, government, hotels) during the collection season | Impacts  | 1 | 2072 | Ka  |
| 232 | Closure of local institution (education, government, hotels) during the collection season | Impacts  | 1 | 2072 | Ka  |
| 233 | Closure of local institution (education, government, hotels) during the collection season | Impacts  | 1 | 2072 | Ka  |
| 234 | Closure of local institution (education, government, hotels) during the collection season | Impacts  | 1 | 2073 | Ka  |
| 235 | Closure of local institution (education, government, hotels) during the collection season | Impacts  | 1 | 2074 | Ka  |
| 236 | Closure of local institution (education, government, hotels) during the collection season | Impacts  | 1 | 2074 | Ka  |
| 237 | Closure of local institution (education, government, hotels) during the collection season | Impacts  | 1 | 2065 | Raj |
| 238 | Closure of local institution (education, government, hotels) during the collection season | Impacts  | 1 | 2066 | Raj |

|     |                                                                                           |         |   |      |     |
|-----|-------------------------------------------------------------------------------------------|---------|---|------|-----|
| 239 | Closure of local institution (education, government, hotels) during the collection season | Impacts | 1 | 2066 | Raj |
| 240 | Closure of local institution (education, government, hotels) during the collection season | Impacts | 1 | 2067 | Raj |
| 241 | Closure of local institution (education, government, hotels) during the collection season | Impacts | 1 | 2068 | Raj |
| 242 | Closure of local institution (education, government, hotels) during the collection season | Impacts | 1 | 2068 | Raj |
| 243 | Closure of local institution (education, government, hotels) during the collection season | Impacts | 1 | 2068 | Raj |
| 244 | Closure of local institution (education, government, hotels) during the collection season | Impacts | 1 | 2068 | Raj |
| 245 | Closure of local institution (education, government, hotels) during the collection season | Impacts | 1 | 2071 | Raj |
| 246 | Closure of local institution (education, government, hotels) during the collection season | Impacts | 1 | 2072 | Raj |
| 247 | Closure of local institution (education, government, hotels) during the collection season | Impacts | 1 | 2066 | KP  |
| 248 | Closure of local institution (education, government, hotels) during the collection season | Impacts | 1 | 2066 | KP  |
| 249 | Closure of local institution (education, government, hotels) during the collection season | Impacts | 1 | 2068 | KP  |
| 250 | Closure of local institution (education, government, hotels) during the collection season | Impacts | 1 | 2068 | KP  |
| 251 | Closure of local institution (education, government, hotels) during the collection season | Impacts | 1 | 2068 | KP  |
| 252 | Closure of local institution (education, government, hotels) during the collection season | Impacts | 1 | 2069 | KP  |
| 253 | Closure of local institution (education, government, hotels) during the collection season | Impacts | 1 | 2069 | KP  |

|     |                                                                                           |         |   |      |    |
|-----|-------------------------------------------------------------------------------------------|---------|---|------|----|
| 254 | Closure of local institution (education, government, hotels) during the collection season | Impacts | 1 | 2070 | KP |
| 255 | Closure of local institution (education, government, hotels) during the collection season | Impacts | 1 | 2070 | KP |
| 256 | Closure of local institution (education, government, hotels) during the collection season | Impacts | 1 | 2071 | KP |
| 257 | Closure of local institution (education, government, hotels) during the collection season | Impacts | 1 | 2071 | KP |
| 258 | Closure of local institution (education, government, hotels) during the collection season | Impacts | 1 | 2071 | KP |
| 259 | Closure of local institution (education, government, hotels) during the collection season | Impacts | 1 | 2071 | KP |
| 260 | Closure of local institution (education, government, hotels) during the collection season | Impacts | 1 | 2071 | KP |
| 261 | Closure of local institution (education, government, hotels) during the collection season | Impacts | 1 | 2071 | KP |
| 262 | Closure of local institution (education, government, hotels) during the collection season | Impacts | 1 | 2071 | KP |
| 263 | Closure of local institution (education, government, hotels) during the collection season | Impacts | 1 | 2072 | KP |
| 264 | Closure of local institution (education, government, hotels) during the collection season | Impacts | 1 | 2072 | KP |
| 265 | Closure of local institution (education, government, hotels) during the collection season | Impacts | 1 | 2073 | KP |
| 266 | Closure of local institution (education, government, hotels) during the collection season | Impacts | 1 | 2073 | KP |
| 267 | Closure of local institution (education, government, hotels) during the collection season | Impacts | 1 | 2074 | KP |
| 268 | Closure of local institution (education, government, hotels) during the collection season | Impacts | 1 | 2074 | KP |

|     |                                                                                           |         |   |      |      |
|-----|-------------------------------------------------------------------------------------------|---------|---|------|------|
| 269 | Closure of local institution (education, government, hotels) during the collection season | Impacts | 1 | 2066 | Nag  |
| 270 | Closure of local institution (education, government, hotels) during the collection season | Impacts | 1 | 2068 | Nag  |
| 271 | Closure of local institution (education, government, hotels) during the collection season | Impacts | 1 | 2070 | Nag  |
| 272 | Closure of local institution (education, government, hotels) during the collection season | Impacts | 1 | 2070 | Nag  |
| 273 | Closure of local institution (education, government, hotels) during the collection season | Impacts | 1 | 2070 | Nag  |
| 274 | Closure of local institution (education, government, hotels) during the collection season | Impacts | 1 | 2073 | Nag  |
| 275 | Closure of local institution (education, government, hotels) during the collection season | Impacts | 1 | 2065 | Naya |
| 276 | Closure of local institution (education, government, hotels) during the collection season | Impacts | 1 | 2065 | Naya |
| 277 | Closure of local institution (education, government, hotels) during the collection season | Impacts | 1 | 2066 | Naya |
| 278 | Closure of local institution (education, government, hotels) during the collection season | Impacts | 1 | 2067 | Naya |
| 279 | Closure of local institution (education, government, hotels) during the collection season | Impacts | 1 | 2067 | Naya |
| 280 | Closure of local institution (education, government, hotels) during the collection season | Impacts | 1 | 2068 | Naya |
| 281 | Closure of local institution (education, government, hotels) during the collection season | Impacts | 1 | 2069 | Naya |
| 282 | Closure of local institution (education, government, hotels) during the collection season | Impacts | 1 | 2070 | Naya |
| 283 | Closure of local institution (education, government, hotels) during the collection season | Impacts | 1 | 2071 | Naya |

|     |                                                                                           |         |   |      |      |
|-----|-------------------------------------------------------------------------------------------|---------|---|------|------|
| 284 | Closure of local institution (education, government, hotels) during the collection season | Impacts | 1 | 2072 | Naya |
| 285 | Closure of local institution (education, government, hotels) during the collection season | Impacts | 1 | 2072 | Naya |
| 286 | Closure of local institution (education, government, hotels) during the collection season | Impacts | 1 | 2072 | Naya |
| 287 | Closure of local institution (education, government, hotels) during the collection season | Impacts | 1 | 2073 | Naya |
| 288 | Closure of local institution (education, government, hotels) during the collection season | Impacts | 1 | 2074 | Naya |
| 289 | Closure of local institution (education, government, hotels) during the collection season | Impacts | 1 | 2074 | Naya |
| 290 | Closure of local institution (education, government, hotels) during the collection season | Impacts | 1 | 2065 | KP   |
| 291 | Closure of local institution (education, government, hotels) during the collection season | Impacts | 1 | 2065 | KP   |
| 292 | Closure of local institution (education, government, hotels) during the collection season | Impacts | 1 | 2065 | KP   |
| 293 | Closure of local institution (education, government, hotels) during the collection season | Impacts | 1 | 2072 | KP   |
| 294 | Closure of local institution (education, government, hotels) during the collection season | Impacts | 1 | 2068 | KP   |
| 295 | Closure of local institution (education, government, hotels) during the collection season | Impacts | 1 | 2073 | Naya |
| 296 | Closure of local institution (education, government, hotels) during the collection season | Impacts | 1 | 2067 | KP   |
| 297 | Closure of local institution (education, government, hotels) during the collection season | Impacts | 1 | 2067 | KP   |
| 298 | Closure of local institution (education, government, hotels) during the collection season | Impacts | 1 | 2074 | KP   |

|     |                                                                                           |         |   |      |     |
|-----|-------------------------------------------------------------------------------------------|---------|---|------|-----|
| 299 | Closure of local institution (education, government, hotels) during the collection season | Impacts | 1 | 2070 | KP  |
| 300 | Closure of local institution (education, government, hotels) during the collection season | Impacts | 1 | 2066 | AP  |
| 301 | Closure of local institution (education, government, hotels) during the collection season | Impacts | 1 | 2068 | AP  |
| 302 | Closure of local institution (education, government, hotels) during the collection season | Impacts | 1 | 2065 | KP  |
| 303 | Closure of local institution (education, government, hotels) during the collection season | Impacts | 1 | 2070 | Nag |
| 304 | Closure of local institution (education, government, hotels) during the collection season | Impacts | 1 | 2071 | KP  |
| 305 | Closure of local institution (education, government, hotels) during the collection season | Impacts | 1 | 2071 | KP  |
| 306 | Closure of local institution (education, government, hotels) during the collection season | Impacts | 1 | 2072 | KP  |
| 307 | Closure of local institution (education, government, hotels) during the collection season | Impacts | 1 | 2065 | KP  |
| 308 | Closure of local institution (education, government, hotels) during the collection season | Impacts | 1 | 2071 | KP  |
| 309 | Closure of local institution (education, government, hotels) during the collection season | Impacts | 1 | 2071 | Nag |
| 310 | Closure of local institution (education, government, hotels) during the collection season | Impacts | 1 | 2072 | KP  |
| 311 | Closure of local institution (education, government, hotels) during the collection season | Impacts | 1 | 2065 | KP  |
| 312 | Closure of local institution (education, government, hotels) during the collection season | Impacts | 1 | 2071 | Nag |
| 313 | Closure of local institution (education, government, hotels) during the collection season | Impacts | 1 | 2071 | Nag |



|     |                                                                                           |         |   |      |     |
|-----|-------------------------------------------------------------------------------------------|---------|---|------|-----|
| 314 | Closure of local institution (education, government, hotels) during the collection season | Impacts | 1 | 2065 | KP  |
| 315 | Closure of local institution (education, government, hotels) during the collection season | Impacts | 1 | 2071 | KP  |
| 316 | Closure of local institution (education, government, hotels) during the collection season | Impacts | 1 | 2070 | Nag |
| 317 | Closure of local institution (education, government, hotels) during the collection season | Impacts | 1 | 2065 | AP  |
| 318 | Closure of local institution (education, government, hotels) during the collection season | Impacts | 1 | 2071 | GKP |
| 319 | Closure of local institution (education, government, hotels) during the collection season | Impacts | 1 | 2071 | Nag |
| 320 | Closure of local institution (education, government, hotels) during the collection season | Impacts | 1 | 2068 | AP  |
| 321 | Closure of local institution (education, government, hotels) during the collection season | Impacts | 1 | 2071 | KP  |
| 322 | Closure of local institution (education, government, hotels) during the collection season | Impacts | 1 | 2072 | KP  |
| 323 | Closure of local institution (education, government, hotels) during the collection season | Impacts | 1 | 2071 | KP  |
| 324 | Closure of local institution (education, government, hotels) during the collection season | Impacts | 1 | 2071 | Nag |
| 325 | Closure of local institution (education, government, hotels) during the collection season | Impacts | 1 | 2071 | KP  |
| 326 | Closure of local institution (education, government, hotels) during the collection season | Impacts | 1 | 2072 | KP  |
| 327 | Closure of local institution (education, government, hotels) during the collection season | Impacts | 1 | 2071 | Nag |
| 328 | Closure of local institution (education, government, hotels) during the collection season | Impacts | 1 | 2076 | NAG |

|     |                                                                                           |         |   |      |     |
|-----|-------------------------------------------------------------------------------------------|---------|---|------|-----|
| 329 | Closure of local institution (education, government, hotels) during the collection season | Impacts | 1 | 2076 | NAG |
| 330 | Closure of local institution (education, government, hotels) during the collection season | Impacts | 1 | 2076 | NAG |
| 331 | Closure of local institution (education, government, hotels) during the collection season | Impacts | 1 | 2076 | NAG |
| 332 | Closure of local institution (education, government, hotels) during the collection season | Impacts | 1 | 2076 | NAG |
| 333 | Closure of local institution (education, government, hotels) during the collection season | Impacts | 1 | 2076 | NAG |
| 334 | Closure of local institution (education, government, hotels) during the collection season | Impacts | 1 | 2076 | NAG |
| 335 | Closure of local institution (education, government, hotels) during the collection season | Impacts | 1 | 2076 | NAG |
| 336 | Closure of local institution (education, government, hotels) during the collection season | Impacts | 1 | 2076 | NAG |
| 337 | Closure of local institution (education, government, hotels) during the collection season | Impacts | 1 | 2076 | NAG |
| 338 | Closure of local institution (education, government, hotels) during the collection season | Impacts | 1 | 2076 | NAG |
| 339 | Closure of local institution (education, government, hotels) during the collection season | Impacts | 1 | 2076 | NAG |
| 340 | Closure of local institution (education, government, hotels) during the collection season | Impacts | 1 | 2076 | NAG |
| 341 | Closure of local institution (education, government, hotels) during the collection season | Impacts | 1 | 2075 | RAJ |
| 342 | Closure of local institution (education, government, hotels) during the collection season | Impacts | 1 | 2075 | RAJ |
| 343 | Closure of local institution (education, government, hotels) during the collection season | Impacts | 1 | 2075 | RAJ |

|     |                                                                                           |            |   |      |      |
|-----|-------------------------------------------------------------------------------------------|------------|---|------|------|
| 344 | Closure of local institution (education, government, hotels) during the collection season | Impacts    | 1 | 2075 | RAJ  |
| 345 | Closure of local institution (education, government, hotels) during the collection season | Impacts    | 1 | 2075 | RAJ  |
| 346 | Closure of local institution (education, government, hotels) during the collection season | Impacts    | 1 | 2075 | RAJ  |
| 347 | Closure of local institution (education, government, hotels) during the collection season | Impacts    | 1 | 2075 | RAJ  |
| 348 | Closure of local institution (education, government, hotels) during the collection season | Impacts    | 1 | 2075 | RAJ  |
| 349 | Closure of local institution (education, government, hotels) during the collection season | Impacts    | 1 | 2075 | RAJ  |
| 350 | Closure of local institution (education, government, hotels) during the collection season | Impacts    | 1 | 2075 | RAJ  |
| 351 | Closure of local institution (education, government, hotels) during the collection season | Impacts    | 1 | 2075 | RAJ  |
| 352 | Closure of local institution (education, government, hotels) during the collection season | Impacts    | 1 | 2075 | RAJ  |
| 353 | Closure of local institution (education, government, hotels) during the collection season | Impacts    | 1 | 2075 | RAJ  |
| 354 | Closure of local institution (education, government, hotels) during the collection season | Impacts    | 1 | 2076 | AP   |
| 355 | Closure of local institution (education, government, hotels) during the collection season | Impacts    | 1 | 2074 | Naya |
| 356 | Closure of local institution (education, government, hotels) during the collection season | Impacts    | 1 | 2076 | Naya |
| 357 | Code of conduct issued for harvesters                                                     | Response   | 1 | 2071 | Nag  |
| 358 | Code of conduct issued for harvesters                                                     | Response   | 1 | 2075 | RAJ  |
| 359 | Code of conduct issued for harvesters                                                     | Response   | 1 | 2075 | RAJ  |
| 360 | Collection entry permit distribution                                                      | Governance | 1 | 2070 | Naya |
| 361 | Collection entry permit distribution                                                      | Governance | 1 | 2071 | Nag  |
| 362 | Collection entry permit distribution                                                      | Governance | 1 | 2069 | Raj  |

|     |                                                    |            |   |      |      |
|-----|----------------------------------------------------|------------|---|------|------|
| 363 | Collection entry permit distribution               | Governance | 1 | 2066 | Nag  |
| 364 | Collection entry permit distribution               | Governance | 1 | 2067 | Nag  |
| 365 | Collection entry permit distribution               | Governance | 1 | 2075 | RAJ  |
| 366 | Collection entry permit distribution               | Governance | 1 | 2075 | RAJ  |
| 367 | Collection entry permit distribution               | Governance | 1 | 2074 | Naya |
| 368 | Collection entry permit distribution               | Governance | 1 | 2078 | Naya |
| 369 | Collectors vs State conflict on revenue collection | Impacts    | 1 | 2067 | Nag  |
| 370 | Collectors vs State conflict on revenue sharing    | Impacts    | 1 | 2071 | Nag  |
| 371 | Collectors vs State conflict on revenue sharing    | Impacts    | 1 | 2071 | Nag  |
| 372 | Collectors vs State disagreements                  | Impacts    | 1 | 2071 | Nag  |
| 373 | Collectors vs State disagreements                  | Impacts    | 1 | 2072 | Nag  |
| 374 | Collectors vs State disagreements                  | Impacts    | 1 | 2073 | Nag  |
| 375 | Collectors vs State disagreements                  | Impacts    | 1 | 2073 | Nag  |
| 376 | Collectors vs State disagreements                  | Impacts    | 1 | 2065 | KP   |
| 377 | Collectors vs State disagreements                  | Impacts    | 1 | 2068 | KP   |
| 378 | Collectors vs State disagreements                  | Impacts    | 1 | 2069 | KP   |
| 379 | Collectors vs State disagreements                  | Impacts    | 1 | 2071 | KP   |
| 380 | Collectors vs State disagreements                  | Impacts    | 1 | 2071 | KP   |
| 381 | Collectors vs State disagreements                  | Impacts    | 1 | 2075 | RAJ  |
| 382 | Collectors vs State disagreements                  | Impacts    | 1 | 2075 | RAJ  |
| 383 | Collectors vs State disagreements                  | Impacts    | 1 | 2075 | RAJ  |
| 384 | Collectors vs State disagreements (trade related)  | Impacts    | 1 | 2071 | KP   |
| 385 | Collectors vs State disagreements                  | Impacts    | 1 | 2078 | Nag  |
| 386 | Collectors vs State disagreements                  | Impacts    | 1 | 2078 | Nag  |
| 387 | Commercialisation of caterpillar fungus            | Trade      | 1 | 2071 | KP   |
| 388 | Commercialisation of caterpillar fungus            | Trade      | 1 | 2078 | Naya |
| 389 | Commercialisation of caterpillar fungus            | Trade      | 1 | 2077 | Ka   |
| 390 | Commercialisation of caterpillar fungus            | Trade      | 1 | 2076 | Naya |
| 391 | Commercialisation of caterpillar fungus            | Trade      | 1 | 2076 | Naya |
| 392 | Commercialisation of caterpillar fungus            | Trade      | 1 | 2078 | Naya |
| 393 | Commercialisation of caterpillar fungus            | Trade      | 1 | 2078 | Naya |

|     |                                                                 |          |   |      |      |
|-----|-----------------------------------------------------------------|----------|---|------|------|
| 394 | Commercialisation of caterpillar fungus                         | Trade    | 1 | 2078 | Naya |
| 395 | Commercialisation of caterpillar fungus                         | Trade    | 1 | 2078 | Naya |
| 396 | Commercialisation of caterpillar fungus                         | Trade    | 1 | 2077 | Ka   |
| 397 | Commercialisation of caterpillar fungus                         | Trade    | 1 | 2077 | Ka   |
| 398 | Commercialisation of caterpillar fungus                         | Trade    | 1 | 2077 | Ka   |
| 399 | Committee to control illegal trade                              | Response | 1 | 2073 | KP   |
| 400 | Competition between traders to purchase caterpillar fungus      | Trade    | 1 | 2068 | Raj  |
| 401 | Confiscation of caterpillar fungus by law enforcing agency      | Response | 1 | 2069 | Naya |
| 402 | Confiscation of caterpillar fungus by law enforcing agency      | Response | 1 | 2068 | KP   |
| 403 | Confiscation of caterpillar fungus by law enforcing agency      | Response | 1 | 2070 | Naya |
| 404 | Confiscation of illegal timber and wildlife from the harvesters | Response | 1 | 2065 | KP   |
| 405 | Conflicts among harvesters                                      | Impacts  | 1 | 2073 | Nag  |
| 406 | Conflicts among harvesters                                      | Impacts  | 1 | 2073 | Raj  |
| 407 | Conflicts among harvesters                                      | Impacts  | 1 | 2068 | Raj  |
| 408 | Conflicts among harvesters                                      | Impacts  | 1 | 2068 | Raj  |
| 409 | Conflicts among harvesters                                      | Impacts  | 1 | 2065 | Raj  |
| 410 | Conflicts among harvesters                                      | Impacts  | 1 | 2068 | Raj  |
| 411 | Conflicts among harvesters                                      | Impacts  | 1 | 2067 | Naya |
| 412 | Conflicts among harvesters                                      | Impacts  | 1 | 2070 | Nag  |
| 413 | Conflicts among harvesters                                      | Impacts  | 1 | 2070 | Nag  |
| 414 | Conflicts among harvesters                                      | Impacts  | 1 | 2065 | KP   |
| 415 | Conflicts among harvesters                                      | Impacts  | 1 | 2071 | KP   |
| 416 | Conflicts among harvesters                                      | Impacts  | 1 | 2074 | Raj  |
| 417 | Conflicts among harvesters                                      | Impacts  | 1 | 2071 | AP   |
| 418 | Conflicts among harvesters                                      | Impacts  | 1 | 2072 | AP   |
| 419 | Conflicts among harvesters                                      | Impacts  | 1 | 2069 | GKP  |
| 420 | Conflicts among harvesters                                      | Impacts  | 1 | 2065 | GKP  |
| 421 | Conflicts among harvesters                                      | Impacts  | 1 | 2066 | GKP  |
| 422 | Conflicts among harvesters                                      | Impacts  | 1 | 2070 | GKP  |
| 423 | Conflicts among harvesters                                      | Impacts  | 1 | 2070 | GKP  |
| 424 | Conflicts among harvesters                                      | Impacts  | 1 | 2072 | GKP  |

|     |                                                                              |         |   |      |      |
|-----|------------------------------------------------------------------------------|---------|---|------|------|
| 425 | Conflicts among harvesters                                                   | Impacts | 1 | 2074 | GKP  |
| 426 | Conflicts among harvesters                                                   | Impacts | 1 | 2066 | AP   |
| 427 | Conflicts among harvesters                                                   | Impacts | 1 | 2066 | AP   |
| 428 | Conflicts among harvesters                                                   | Impacts | 1 | 2074 | Nag  |
| 429 | Conflicts among harvesters                                                   | Impacts | 1 | 2075 | RAJ  |
| 430 | Conflicts among harvesters                                                   | Impacts | 1 | 2074 | Naya |
| 431 | Conflicts among harvesters (entry fee collection)                            | Impacts | 1 | 2066 | AP   |
| 432 | Conflicts among harvesters (entry fee collection)                            | Impacts | 1 | 2066 | AP   |
| 433 | Conflicts among harvesters on boundaries                                     | Impacts | 1 | 2066 | AP   |
| 434 | Conflicts among harvesters on boundaries                                     | Impacts | 1 | 2066 | AP   |
| 435 | Conflicts among harvesters on boundaries                                     | Impacts | 1 | 2069 | AP   |
| 436 | Conflicts on the ownership of the pastures                                   | Impacts | 1 | 2067 | Raj  |
| 437 | Conflicts on the ownership of the pastures                                   | Impacts | 1 | 2071 | Nag  |
| 438 | Conflicts related to revenue distribution                                    | Impacts | 1 | 2069 | AP   |
| 439 | Conflicts related to revenue distribution                                    | Impacts | 1 | 2071 | AP   |
| 440 | Conflicts related to revenue distribution and use                            | Impacts | 1 | 2071 | AP   |
| 441 | Conflicts related to revenue distribution and use                            | Impacts | 1 | 2071 | AP   |
| 442 | Conflicts related to unstable price of caterpillar fungus                    | Impacts | 1 | 2071 | AP   |
| 443 | Contractor takes permission from forest office to collect caterpillar fungus | Trade   | 1 | 2071 | AP   |
| 444 | Contribution of caterpillar fungus income to the HHs income                  | Impacts | 1 | 2072 | AP   |
| 445 | Contribution of caterpillar fungus income to the HHs income                  | Impacts | 1 | 2072 | AP   |
| 446 | Contribution of caterpillar fungus income to the HHs income                  | Impacts | 1 | 2073 | AP   |
| 447 | Contribution of caterpillar fungus income to the HHs income                  | Impacts | 1 | 2074 | AP   |
| 448 | Contribution of caterpillar fungus income to the HHs income                  | Impacts | 1 | 2070 | KP   |
| 449 | Contribution of caterpillar fungus income to the HHs income                  | Impacts | 1 | 2070 | GKP  |
| 450 | Contribution of caterpillar fungus income to the HHs income                  | Impacts | 1 | 2071 | Nag  |
| 451 | Contribution of caterpillar fungus income to the HHs income                  | Impacts | 1 | 2065 | KP   |
| 452 | Contribution of caterpillar fungus income to the HHs income                  | Impacts | 1 | 2072 | Ka   |
| 453 | Contribution of caterpillar fungus income to the HHs income                  | Impacts | 1 | 2073 | Ka   |
| 454 | Contribution of caterpillar fungus income to the HHs income                  | Impacts | 1 | 2069 | Raj  |

|     |                                                             |         |   |      |      |
|-----|-------------------------------------------------------------|---------|---|------|------|
| 455 | Contribution of caterpillar fungus income to the HHs income | Impacts | 1 | 2069 | Naya |
| 456 | Contribution of caterpillar fungus income to the HHs income | Impacts | 1 | 2069 | Naya |
| 457 | Contribution of caterpillar fungus income to the HHs income | Impacts | 1 | 2074 | Naya |
| 458 | Contribution of caterpillar fungus income to the HHs income | Impacts | 1 | 2067 | Nag  |
| 459 | Contribution of caterpillar fungus income to the HHs income | Impacts | 1 | 2069 | Nag  |
| 460 | Contribution of caterpillar fungus income to the HHs income | Impacts | 1 | 2070 | Nag  |
| 461 | Contribution of caterpillar fungus income to the HHs income | Impacts | 1 | 2065 | KP   |
| 462 | Contribution of caterpillar fungus income to the HHs income | Impacts | 1 | 2068 | KP   |
| 463 | Contribution of caterpillar fungus income to the HHs income | Impacts | 1 | 2068 | KP   |
| 464 | Contribution of caterpillar fungus income to the HHs income | Impacts | 1 | 2068 | KP   |
| 465 | Contribution of caterpillar fungus income to the HHs income | Impacts | 1 | 2069 | KP   |
| 466 | Contribution of caterpillar fungus income to the HHs income | Impacts | 1 | 2071 | KP   |
| 467 | Contribution of caterpillar fungus income to the HHs income | Impacts | 1 | 2071 | KP   |
| 468 | Contribution of caterpillar fungus income to the HHs income | Impacts | 1 | 2071 | KP   |
| 469 | Contribution of caterpillar fungus income to the HHs income | Impacts | 1 | 2072 | KP   |
| 470 | Contribution of caterpillar fungus income to the HHs income | Impacts | 1 | 2072 | KP   |
| 471 | Contribution of caterpillar fungus income to the HHs income | Impacts | 1 | 2074 | KP   |
| 472 | Contribution of caterpillar fungus income to the HHs income | Impacts | 1 | 2070 | KP   |
| 473 | Contribution of caterpillar fungus income to the HHs income | Impacts | 1 | 2070 | KP   |
| 474 | Contribution of caterpillar fungus income to the HHs income | Impacts | 1 | 2070 | KP   |
| 475 | Contribution of caterpillar fungus income to the HHs income | Impacts | 1 | 2070 | Nag  |
| 476 | Contribution of caterpillar fungus income to the HHs income | Impacts | 1 | 2071 | KP   |
| 477 | Contribution of caterpillar fungus income to the HHs income | Impacts | 1 | 2069 | Ka   |
| 478 | Contribution of caterpillar fungus income to the HHs income | Impacts | 1 | 2069 | AP   |
| 479 | Contribution of caterpillar fungus income to the HHs income | Impacts | 1 | 2069 | AP   |
| 480 | Contribution of caterpillar fungus income to the HHs income | Impacts | 1 | 2067 | GKP  |
| 481 | Contribution of caterpillar fungus income to the HHs income | Impacts | 1 | 2068 | GKP  |
| 482 | Contribution of caterpillar fungus income to the HHs income | Impacts | 1 | 2069 | GKP  |
| 483 | Contribution of caterpillar fungus income to the HHs income | Impacts | 1 | 2068 | Raj  |
| 484 | Contribution of caterpillar fungus income to the HHs income | Impacts | 1 | 2068 | Naya |
| 485 | Contribution of caterpillar fungus income to the HHs income | Impacts | 1 | 2070 | KP   |

|     |                                                             |         |   |      |      |
|-----|-------------------------------------------------------------|---------|---|------|------|
| 486 | Contribution of caterpillar fungus income to the HHs income | Impacts | 1 | 2070 | KP   |
| 487 | Contribution of caterpillar fungus income to the HHs income | Impacts | 1 | 2069 | Naya |
| 488 | Contribution of caterpillar fungus income to the HHs income | Impacts | 1 | 2068 | KP   |
| 489 | Contribution of caterpillar fungus income to the HHs income | Impacts | 1 | 2069 | KP   |
| 490 | Contribution of caterpillar fungus income to the HHs income | Impacts | 1 | 2070 | KP   |
| 491 | Contribution of caterpillar fungus income to the HHs income | Impacts | 1 | 2071 | KP   |
| 492 | Contribution of caterpillar fungus income to the HHs income | Impacts | 1 | 2071 | KP   |
| 493 | Contribution of caterpillar fungus income to the HHs income | Impacts | 1 | 2072 | KP   |
| 494 | Contribution of caterpillar fungus income to the HHs income | Impacts | 1 | 2072 | AP   |
| 495 | Contribution of caterpillar fungus income to the HHs income | Impacts | 1 | 2073 | KP   |
| 496 | Contribution of caterpillar fungus income to the HHs income | Impacts | 1 | 2071 | Nag  |
| 497 | Contribution of caterpillar fungus income to the HHs income | Impacts | 1 | 2067 | KP   |
| 498 | Contribution of caterpillar fungus income to the HHs income | Impacts | 1 | 2075 | RAJ  |
| 499 | Contribution of caterpillar fungus income to the HHs income | Impacts | 1 | 2075 | RAJ  |
| 500 | Contribution of caterpillar fungus income to the HHs income | Impacts | 1 | 2075 | RAJ  |
| 501 | Contribution of caterpillar fungus income to the HHs income | Impacts | 1 | 2075 | RAJ  |
| 502 | Contribution of caterpillar fungus income to the HHs income | Impacts | 1 | 2075 | RAJ  |
| 503 | Contribution of caterpillar fungus income to the HHs income | Impacts | 1 | 2075 | RAJ  |
| 504 | Contribution of caterpillar fungus income to the HHs income | Impacts | 1 | 2075 | RAJ  |
| 505 | Contribution of caterpillar fungus income to the HHs income | Impacts | 1 | 2075 | RAJ  |
| 506 | Contribution of caterpillar fungus income to the HHs income | Impacts | 1 | 2075 | RAJ  |
| 507 | Contribution of caterpillar fungus income to the HHs income | Impacts | 1 | 2075 | RAJ  |
| 508 | Contribution of caterpillar fungus income to the HHs income | Impacts | 1 | 2075 | RAJ  |
| 509 | Contribution of caterpillar fungus income to the HHs income | Impacts | 1 | 2075 | RAJ  |
| 510 | Contribution of caterpillar fungus income to the HHs income | Impacts | 1 | 2075 | RAJ  |
| 511 | Contribution of caterpillar fungus income to the HHs income | Impacts | 1 | 2075 | RAJ  |
| 512 | Contribution of caterpillar fungus income to the HHs income | Impacts | 1 | 2075 | RAJ  |
| 513 | Contribution of caterpillar fungus income to the HHs income | Impacts | 1 | 2075 | RAJ  |
| 514 | Contribution of caterpillar fungus income to the HHs income | Impacts | 1 | 2075 | RAJ  |
| 515 | Contribution of caterpillar fungus income to the HHs income | Impacts | 1 | 2075 | RAJ  |
| 516 | Contribution of caterpillar fungus income to the HHs income | Impacts | 1 | 2075 | RAJ  |



|     |                                                             |         |   |      |      |
|-----|-------------------------------------------------------------|---------|---|------|------|
| 517 | Contribution of caterpillar fungus income to the HHs income | Impacts | 1 | 2075 | RAJ  |
| 518 | Contribution of caterpillar fungus income to the HHs income | Impacts | 1 | 2075 | RAJ  |
| 519 | Contribution of caterpillar fungus income to the HHs income | Impacts | 1 | 2075 | RAJ  |
| 520 | Contribution of caterpillar fungus income to the HHs income | Impacts | 1 | 2075 | RAJ  |
| 521 | Contribution of caterpillar fungus income to the HHs income | Impacts | 1 | 2075 | RAJ  |
| 522 | Contribution of caterpillar fungus income to the HHs income | Impacts | 1 | 2075 | RAJ  |
| 523 | Contribution of caterpillar fungus income to the HHs income | Impacts | 1 | 2075 | RAJ  |
| 524 | Contribution of caterpillar fungus income to the HHs income | Impacts | 1 | 2075 | RAJ  |
| 525 | Contribution of caterpillar fungus income to the HHs income | Impacts | 1 | 2075 | RAJ  |
| 526 | Contribution of caterpillar fungus income to the HHs income | Impacts | 1 | 2075 | RAJ  |
| 527 | Contribution of caterpillar fungus income to the HHs income | Impacts | 1 | 2076 | RAJ  |
| 528 | Contribution of caterpillar fungus income to the HHs income | Impacts | 1 | 2076 | Ka   |
| 529 | Contribution of caterpillar fungus income to the HHs income | Impacts | 1 | 2078 | Nag  |
| 530 | Contribution of caterpillar fungus income to the HHs income | Impacts | 1 | 2078 | Nag  |
| 531 | Contribution of caterpillar fungus income to the HHs income | Impacts | 1 | 2078 | KP   |
| 532 | Contribution of caterpillar fungus income to the HHs income | Impacts | 1 | 2078 | KP   |
| 533 | Contribution of caterpillar fungus income to the HHs income | Impacts | 1 | 2078 | KP   |
| 534 | Contribution of caterpillar fungus income to the HHs income | Impacts | 1 | 2074 | Naya |
| 535 | Contribution of caterpillar fungus income to the HHs income | Impacts | 1 | 2074 | Naya |
| 536 | Contribution of caterpillar fungus income to the HHs income | Impacts | 1 | 2074 | Naya |
| 537 | Contribution of caterpillar fungus income to the HHs income | Impacts | 1 | 2076 | Naya |
| 538 | Contribution of caterpillar fungus income to the HHs income | Impacts | 1 | 2076 | Naya |
| 539 | Contribution of caterpillar fungus income to the HHs income | Impacts | 1 | 2076 | Naya |
| 540 | Contribution of caterpillar fungus income to the HHs income | Impacts | 1 | 2076 | Naya |
| 541 | Contribution of caterpillar fungus income to the HHs income | Impacts | 1 | 2078 | Naya |
| 542 | Contribution of caterpillar fungus income to the HHs income | Impacts | 1 | 2078 | Naya |
| 543 | Contribution of caterpillar fungus income to the HHs income | Impacts | 1 | 2078 | Naya |
| 544 | Contribution of caterpillar fungus income to the HHs income | Impacts | 1 | 2078 | Naya |
| 545 | Contribution of caterpillar fungus income to the HHs income | Impacts | 1 | 2078 | Naya |
| 546 | Contribution of caterpillar fungus income to the HHs income | Impacts | 1 | 2078 | Naya |
| 547 | Contribution of caterpillar fungus income to the HHs income | Impacts | 1 | 2075 | RAJ  |

|     |                                                                                 |         |   |      |      |
|-----|---------------------------------------------------------------------------------|---------|---|------|------|
| 548 | Contribution of caterpillar fungus income to the HHs income                     | Impacts | 1 | 2077 | RAJ  |
| 549 | Contribution of caterpillar fungus income to the HHs income                     | Impacts | 1 | 2077 | RAJ  |
| 550 | Contribution of caterpillar fungus income to the HHs income                     | Impacts | 1 | 2078 | RAJ  |
| 551 | Contribution of caterpillar fungus income to the HHs income                     | Impacts | 1 | 2078 | RAJ  |
| 552 | Contribution of caterpillar fungus income to the HHs income                     | Impacts | 1 | 2074 | RAJ  |
| 553 | Contribution of caterpillar fungus income to the HHs income                     | Impacts | 1 | 2067 | Ka   |
| 554 | Contribution of caterpillar fungus income to the HHs income                     | Impacts | 1 | 2067 | Ka   |
| 555 | Contribution of caterpillar fungus income to the HHs income                     | Impacts | 1 | 2068 | Ka   |
| 556 | Contribution of caterpillar fungus income to the HHs income                     | Impacts | 1 | 2068 | Ka   |
| 557 | Contribution of caterpillar fungus income to the HHs income                     | Impacts | 1 | 2076 | Ka   |
| 558 | Contribution of caterpillar fungus income to the HHs income                     | Impacts | 1 | 2077 | Ka   |
| 559 | Contribution of caterpillar fungus income to the HHs income                     | Impacts | 1 | 2077 | Ka   |
| 560 | Contribution of caterpillar fungus income to the HHs income                     | Impacts | 1 | 2077 | Ka   |
| 561 | Contribution of caterpillar fungus income to the HHs income                     | Impacts | 1 | 2077 | Ka   |
| 562 | Contribution of caterpillar fungus income to the HHs income                     | Impacts | 1 | 2077 | Ka   |
| 563 | Contribution of revenue from caterpillar fungus collection to local development | Impacts | 1 | 2072 | Nag  |
| 564 | Contribution of revenue from caterpillar fungus collection to local development | Impacts | 1 | 2069 | Nag  |
| 565 | Contribution of revenue from caterpillar fungus collection to local development | Impacts | 1 | 2068 | Naya |
| 566 | Contribution of revenue from caterpillar fungus collection to local development | Impacts | 1 | 2069 | Nag  |
| 567 | Contribution of revenue from caterpillar fungus collection to local development | Impacts | 1 | 2073 | Nag  |
| 568 | Contribution of revenue from caterpillar fungus collection to local development | Impacts | 1 | 2066 | KP   |
| 569 | Contribution of revenue from caterpillar fungus collection to local development | Impacts | 1 | 2071 | KP   |
| 570 | Contribution of revenue from caterpillar fungus collection to local development | Impacts | 1 | 2071 | Nag  |

|     |                                                                                 |         |   |      |     |
|-----|---------------------------------------------------------------------------------|---------|---|------|-----|
| 571 | Contribution of revenue from caterpillar fungus collection to local development | Impacts | 1 | 2074 | AP  |
| 572 | Contribution of revenue from caterpillar fungus collection to local development | Impacts | 1 | 2067 | AP  |
| 573 | Contribution of revenue from caterpillar fungus collection to local development | Impacts | 1 | 2065 | KP  |
| 574 | Contribution of revenue from caterpillar fungus collection to local development | Impacts | 1 | 2066 | Nag |
| 575 | Contribution of revenue from caterpillar fungus collection to local development | Impacts | 1 | 2068 | Nag |
| 576 | Contribution of revenue from caterpillar fungus collection to local development | Impacts | 1 | 2069 | KP  |
| 577 | Contribution of revenue from caterpillar fungus collection to local development | Impacts | 1 | 2069 | KP  |
| 578 | Contribution of revenue from caterpillar fungus collection to local development | Impacts | 1 | 2069 | KP  |
| 579 | Contribution of revenue from caterpillar fungus collection to local development | Impacts | 1 | 2069 | KP  |
| 580 | Contribution of revenue from caterpillar fungus collection to local development | Impacts | 1 | 2069 | KP  |
| 581 | Contribution of revenue from caterpillar fungus collection to local development | Impacts | 1 | 2069 | KP  |
| 582 | Contribution of revenue from caterpillar fungus collection to local development | Impacts | 1 | 2069 | KP  |
| 583 | Contribution of revenue from caterpillar fungus collection to local development | Impacts | 1 | 2065 | KP  |
| 584 | Contribution of revenue from caterpillar fungus collection to local development | Impacts | 1 | 2076 | RAJ |
| 585 | Contribution of revenue from caterpillar fungus collection to local development | Impacts | 1 | 2076 | RAJ |

|     |                                                                                 |         |   |      |     |
|-----|---------------------------------------------------------------------------------|---------|---|------|-----|
| 586 | Contribution of revenue from caterpillar fungus collection to local development | Impacts | 1 | 2076 | RAJ |
| 587 | Contribution of revenue from caterpillar fungus collection to local development | Impacts | 1 | 2076 | RAJ |
| 588 | Contribution of revenue from caterpillar fungus collection to local development | Impacts | 1 | 2076 | RAJ |
| 589 | Contribution of revenue from caterpillar fungus collection to local development | Impacts | 1 | 2076 | RAJ |
| 590 | Contribution of revenue from caterpillar fungus collection to local development | Impacts | 1 | 2076 | RAJ |
| 591 | Contribution of revenue from caterpillar fungus collection to local development | Impacts | 1 | 2076 | RAJ |
| 592 | Contribution of revenue from caterpillar fungus collection to local development | Impacts | 1 | 2076 | RAJ |
| 593 | Contribution of revenue from caterpillar fungus collection to local development | Impacts | 1 | 2076 | RAJ |
| 594 | Contribution of revenue from caterpillar fungus collection to local development | Impacts | 1 | 2076 | RAJ |
| 595 | Contribution of revenue from caterpillar fungus collection to local development | Impacts | 1 | 2076 | RAJ |
| 596 | Contribution of revenue from caterpillar fungus collection to local development | Impacts | 1 | 2076 | RAJ |
| 597 | Contribution of revenue from caterpillar fungus collection to local development | Impacts | 1 | 2076 | RAJ |
| 598 | Contribution of revenue from caterpillar fungus collection to local development | Impacts | 1 | 2076 | RAJ |
| 599 | Contribution of revenue from caterpillar fungus collection to local development | Impacts | 1 | 2078 | RAJ |
| 600 | Contribution of revenue from caterpillar fungus collection to local development | Impacts | 1 | 2078 | RAJ |
| 601 | Contribution of revenue from caterpillar fungus collection to local development | Impacts | 1 | 2078 | RAJ |

|     |                                                                                 |            |   |      |      |
|-----|---------------------------------------------------------------------------------|------------|---|------|------|
| 602 | Contribution of revenue from caterpillar fungus collection to local development | Impacts    | 1 | 2078 | RAJ  |
| 603 | Contribution of revenue from caterpillar fungus collection to local development | Impacts    | 1 | 2078 | RAJ  |
| 604 | Contribution of revenue from caterpillar fungus collection to local development | Impacts    | 1 | 2078 | RAJ  |
| 605 | Contribution of revenue from caterpillar fungus collection to local development | Governance | 1 | 2078 | Nag  |
| 606 | Contribution of revenue from caterpillar fungus collection to local development | Governance | 1 | 2078 | Nag  |
| 607 | Contribution of revenue from caterpillar fungus collection to local development | Governance | 1 | 2078 | KP   |
| 608 | Contribution of revenue from caterpillar fungus collection to local development | Governance | 1 | 2074 | Naya |
| 609 | Contribution of revenue from caterpillar fungus collection to local development | Governance | 1 | 2074 | Naya |
| 610 | Contribution of revenue from caterpillar fungus collection to local development | Governance | 1 | 2074 | Naya |
| 611 | Contribution of revenue from caterpillar fungus collection to local development | Governance | 1 | 2076 | Naya |
| 612 | Contribution of revenue from caterpillar fungus collection to local development | Governance | 1 | 2076 | Naya |
| 613 | Contribution of revenue from caterpillar fungus collection to local development | Governance | 1 | 2076 | Naya |
| 614 | Contribution of revenue from caterpillar fungus collection to local development | Governance | 1 | 2078 | Naya |
| 615 | Contribution of revenue from caterpillar fungus collection to local development | Governance | 1 | 2078 | Naya |
| 616 | Contribution of revenue from caterpillar fungus collection to local development | Governance | 1 | 2078 | Naya |

|     |                                                                                                     |            |   |      |      |
|-----|-----------------------------------------------------------------------------------------------------|------------|---|------|------|
| 617 | Contribution of revenue from caterpillar fungus collection to local development                     | Governance | 1 | 2078 | Naya |
| 618 | Contribution of revenue from caterpillar fungus collection to local development                     | Governance | 1 | 2075 | RAJ  |
| 619 | Contribution of revenue from caterpillar fungus collection to local development                     | Governance | 1 | 2077 | RAJ  |
| 620 | Contribution of revenue from caterpillar fungus collection to local development                     | Governance | 1 | 2078 | Ka   |
| 621 | Convicted culprits are at large                                                                     | Response   | 1 | 2065 | KP   |
| 622 | Counterfeiting caterpillar fungus in the market                                                     | Impacts    | 1 | 2068 | GKP  |
| 623 | Counterfeiting caterpillar fungus in the market                                                     | Impacts    | 1 | 2070 | GKP  |
| 624 | Counterfeiting caterpillar fungus in the market                                                     | Impacts    | 1 | 2071 | GKP  |
| 625 | Counterfeiting caterpillar fungus in the market                                                     | Impacts    | 1 | 2065 | KP   |
| 626 | Culprits (harvesters) arrested for possessing wildlife                                              | Response   | 1 | 2065 | KP   |
| 627 | Culprits (harvesters) arrested for possessing wildlife                                              | Response   | 1 | 2065 | KP   |
| 628 | Culprits arrested (without permits)                                                                 | Response   | 1 | 2068 | KP   |
| 629 | Culprits arrested by the management committee                                                       | Response   | 1 | 2068 | KP   |
| 630 | Culprits arrested for possessing caterpillar fungus (illegal)                                       | Response   | 1 | 2078 | Naya |
| 631 | Culprits arrested for possessing caterpillar fungus (illegal)                                       | Response   | 1 | 2078 | Naya |
| 632 | Culprits arrested for possessing caterpillar fungus (illegal)                                       | Response   | 1 | 2078 | Naya |
| 633 | Culprits arrested for possessing caterpillar fungus (with illegal possession of caterpillar fungus) | Response   | 1 | 2068 | KP   |
| 634 | Culprits arrested for possessing caterpillar fungus (with illegal possession of caterpillar fungus) | Response   | 1 | 2071 | KP   |
| 635 | Culprits arrested for possessing caterpillar fungus (with illegal possession of caterpillar fungus) | Response   | 1 | 2071 | KP   |
| 636 | Culprits arrested for possessing caterpillar fungus (with illegal possession of caterpillar fungus) | Response   | 1 | 2072 | KP   |
| 637 | Culprits arrested for possessing caterpillar fungus (with illegal possession of caterpillar fungus) | Response   | 1 | 2072 | KP   |

|     |                                                                                                     |          |   |      |     |
|-----|-----------------------------------------------------------------------------------------------------|----------|---|------|-----|
| 638 | Culprits arrested for possessing caterpillar fungus (with illegal possession of caterpillar fungus) | Response | 1 | 2074 | KP  |
| 639 | Culprits arrested for possessing caterpillar fungus (with illegal possession of caterpillar fungus) | Response | 1 | 2071 | Ka  |
| 640 | Culprits arrested for possessing caterpillar fungus (with illegal possession of caterpillar fungus) | Response | 1 | 2071 | Ka  |
| 641 | Culprits arrested for possessing caterpillar fungus (with illegal possession of caterpillar fungus) | Response | 1 | 2071 | Ka  |
| 642 | Culprits arrested for possessing caterpillar fungus (with illegal possession of caterpillar fungus) | Response | 1 | 2074 | Ka  |
| 643 | Culprits arrested for possessing caterpillar fungus (with illegal possession of caterpillar fungus) | Response | 1 | 2066 | Raj |
| 644 | Culprits arrested for possessing caterpillar fungus (with illegal possession of caterpillar fungus) | Response | 1 | 2066 | Raj |
| 645 | Culprits arrested for possessing caterpillar fungus (with illegal possession of caterpillar fungus) | Response | 1 | 2068 | Raj |
| 646 | Culprits arrested for possessing caterpillar fungus (with illegal possession of caterpillar fungus) | Response | 1 | 2068 | Raj |
| 647 | Culprits arrested for possessing caterpillar fungus (with illegal possession of caterpillar fungus) | Response | 1 | 2070 | Raj |
| 648 | Culprits arrested for possessing caterpillar fungus (with illegal possession of caterpillar fungus) | Response | 1 | 2070 | Raj |
| 649 | Culprits arrested for possessing caterpillar fungus (with illegal possession of caterpillar fungus) | Response | 1 | 2071 | Nag |
| 650 | Culprits arrested for possessing caterpillar fungus (with illegal possession of caterpillar fungus) | Response | 1 | 2071 | Nag |
| 651 | Culprits arrested for possessing caterpillar fungus (with illegal possession of caterpillar fungus) | Response | 1 | 2078 | RAJ |
| 652 | Culprits arrested for possessing caterpillar fungus (with illegal possession of caterpillar fungus) | Response | 1 | 2078 | RAJ |
| 653 | Culprits arrested for possessing caterpillar fungus (with illegal possession of caterpillar fungus) | Response | 1 | 2068 | Ka  |

|     |                                                             |            |   |      |      |
|-----|-------------------------------------------------------------|------------|---|------|------|
| 654 | Culprits arrested with weapons                              | Response   | 1 | 2073 | Nag  |
| 655 | Culprits arrested with weapons                              | Response   | 1 | 2070 | Nag  |
| 656 | Culprits arrested with weapons                              | Response   | 1 | 2078 | RAJ  |
| 657 | Culprits arrested with weapons                              | Response   | 1 | 2078 | Naya |
| 658 | Culprits arrested with weapons                              | Response   | 1 | 2078 | Naya |
| 659 | Culprits arrested with weapons                              | Response   | 1 | 2078 | Naya |
| 661 | Data of harvesters recorded                                 | Gap        | 1 | 2071 | Nag  |
| 660 | Data of harvesters recorded                                 | Response   | 1 | 2071 | Nag  |
| 662 | Data unavailability of quantity of caterpillar fungus trade | Gap        | 1 | 2072 | Nag  |
| 663 | Data unavailability of quantity of caterpillar fungus trade | Gap        | 1 | 2078 | RAJ  |
| 664 | Death of the harvesters                                     | Challenges | 1 | 2072 | Nag  |
| 665 | Death of the harvesters                                     | Challenges | 1 | 2073 | Nag  |
| 666 | Death of the harvesters                                     | Challenges | 1 | 2071 | Raj  |
| 667 | Death of the harvesters                                     | Challenges | 1 | 2072 | KP   |
| 668 | Death of the harvesters                                     | Challenges | 1 | 2068 | AP   |
| 669 | Death of the harvesters                                     | Challenges | 1 | 2068 | AP   |
| 670 | Death of the harvesters                                     | Challenges | 1 | 2069 | AP   |
| 671 | Death of the harvesters                                     | Challenges | 1 | 2070 | AP   |
| 672 | Death of the harvesters                                     | Challenges | 1 | 2070 | AP   |
| 673 | Death of the harvesters                                     | Challenges | 1 | 2071 | AP   |
| 674 | Death of the harvesters                                     | Challenges | 1 | 2072 | AP   |
| 675 | Death of the harvesters                                     | Challenges | 1 | 2072 | KP   |
| 676 | Death of the harvesters                                     | Challenges | 1 | 2072 | KP   |
| 677 | Death of the harvesters                                     | Challenges | 1 | 2071 | Nag  |
| 678 | Death of the harvesters                                     | Challenges | 1 | 2070 | Raj  |
| 679 | Death of the harvesters                                     | Challenges | 1 | 2072 | AP   |
| 680 | Death of the harvesters                                     | Challenges | 1 | 2072 | Nag  |
| 681 | Death of the harvesters                                     | Challenges | 1 | 2072 | KP   |
| 682 | Death of the harvesters                                     | Challenges | 1 | 2073 | KP   |
| 683 | Death of the harvesters                                     | Challenges | 1 | 2065 | AP   |
| 684 | Death of the harvesters                                     | Challenges | 1 | 2074 | Raj  |



|     |                         |            |   |      |     |
|-----|-------------------------|------------|---|------|-----|
| 685 | Death of the harvesters | Challenges | 1 | 2074 | KP  |
| 686 | Death of the harvesters | Challenges | 1 | 2073 | Nag |
| 687 | Death of the harvesters | Challenges | 1 | 2066 | Raj |
| 688 | Death of the harvesters | Challenges | 1 | 2069 | KP  |
| 689 | Death of the harvesters | Challenges | 1 | 2072 | KP  |
| 690 | Death of the harvesters | Challenges | 1 | 2073 | KP  |
| 691 | Death of the harvesters | Challenges | 1 | 2069 | GKP |
| 692 | Death of the harvesters | Challenges | 1 | 2065 | AP  |
| 693 | Death of the harvesters | Challenges | 1 | 2066 | AP  |
| 694 | Death of the harvesters | Challenges | 1 | 2066 | AP  |
| 695 | Death of the harvesters | Challenges | 1 | 2067 | AP  |
| 696 | Death of the harvesters | Challenges | 1 | 2069 | AP  |
| 697 | Death of the harvesters | Challenges | 1 | 2069 | AP  |
| 698 | Death of the harvesters | Challenges | 1 | 2071 | AP  |
| 699 | Death of the harvesters | Challenges | 1 | 2073 | Ka  |
| 700 | Death of the harvesters | Challenges | 1 | 2073 | Raj |
| 701 | Death of the harvesters | Challenges | 1 | 2073 | Nag |
| 702 | Death of the harvesters | Challenges | 1 | 2073 | KP  |
| 703 | Death of the harvesters | Challenges | 1 | 2074 | AP  |
| 704 | Death of the harvesters | Challenges | 1 | 2071 | AP  |
| 705 | Death of the harvesters | Challenges | 1 | 2073 | AP  |
| 706 | Death of the harvesters | Challenges | 1 | 2068 | Raj |
| 707 | Death of the harvesters | Challenges | 1 | 2071 | Nag |
| 708 | Death of the harvesters | Challenges | 1 | 2072 | Nag |
| 709 | Death of the harvesters | Challenges | 1 | 2073 | Nag |
| 710 | Death of the harvesters | Challenges | 1 | 2071 | KP  |
| 711 | Death of the harvesters | Challenges | 1 | 2069 | Raj |
| 712 | Death of the harvesters | Challenges | 1 | 2073 | KP  |
| 713 | Death of the harvesters | Challenges | 1 | 2068 | KP  |
| 714 | Death of the harvesters | Challenges | 1 | 2072 | KP  |
| 715 | Death of the harvesters | Challenges | 1 | 2071 | Nag |

|     |                                                                |            |   |      |      |
|-----|----------------------------------------------------------------|------------|---|------|------|
| 716 | Death of the harvesters                                        | Challenges | 1 | 2067 | KP   |
| 717 | Death of the harvesters                                        | Challenges | 1 | 2078 | RAJ  |
| 718 | Death of the harvesters                                        | Challenges | 1 | 2075 | GKP  |
| 719 | Death of the harvesters                                        | Challenges | 1 | 2075 | GKP  |
| 720 | Death of the harvesters                                        | Challenges | 1 | 2075 | GKP  |
| 721 | Death of the harvesters                                        | Challenges | 1 | 2075 | GKP  |
| 722 | Death of the harvesters                                        | Challenges | 1 | 2075 | GKP  |
| 723 | Death of the harvesters                                        | Challenges | 1 | 2075 | GKP  |
| 724 | Death of the harvesters (children)                             | Challenges | 1 | 2069 | KP   |
| 725 | Death of the harvesters                                        | Challenges | 1 | 2078 | Nag  |
| 726 | Death of the harvesters                                        | Challenges | 1 | 2076 | Naya |
| 727 | Death of the harvesters                                        | Challenges | 1 | 2076 | Naya |
| 728 | Death of the harvesters                                        | Challenges | 1 | 2078 | Naya |
| 729 | Death of the harvesters                                        | Challenges | 1 | 2078 | Naya |
| 730 | Death of the harvesters                                        | Challenges | 1 | 2078 | Ka   |
| 731 | Deaths and missing of harvesters                               | Challenges | 1 | 2073 | Nag  |
| 732 | Deaths and missing of harvesters                               | Challenges | 1 | 2073 | KP   |
| 733 | Deaths and missing of harvesters                               | Challenges | 1 | 2074 | KP   |
| 734 | Deaths and missing of harvesters                               | Challenges | 1 | 2071 | Nag  |
| 735 | Deaths and missing of harvesters                               | Challenges | 1 | 2071 | Nag  |
| 736 | Deaths and missing of harvesters                               | Challenges | 1 | 2071 | Nag  |
| 737 | Deaths and missing of harvesters                               | Challenges | 1 | 2068 | KP   |
| 738 | Debt taken to collect the caterpillar fungus                   | Harvesting | 1 | 2075 | AP   |
| 739 | Debt taken to collect the caterpillar fungus                   | Harvesting | 1 | 2076 | Ka   |
| 740 | Debt taken to collect the caterpillar fungus                   | Harvesting | 1 | 2076 | Ka   |
| 821 | Decreased caterpillar fungus availability/productivity/revenue | Harvesting | 1 | 2078 | GKP  |
| 822 | Decreased caterpillar fungus availability/productivity/revenue | Harvesting | 1 | 2078 | Naya |
| 741 | Decreased caterpillar fungus availability/productivity/revenue | Impacts    | 1 | 2072 | KP   |
| 742 | Decreased caterpillar fungus availability/productivity/revenue | Impacts    | 1 | 2074 | KP   |
| 743 | Decreased caterpillar fungus availability/productivity/revenue | Impacts    | 1 | 2066 | Raj  |
| 744 | Decreased caterpillar fungus availability/productivity/revenue | Impacts    | 1 | 2073 | KP   |

|     |                                                                |         |   |      |      |
|-----|----------------------------------------------------------------|---------|---|------|------|
| 745 | Decreased caterpillar fungus availability/productivity/revenue | Impacts | 1 | 2074 | GKP  |
| 746 | Decreased caterpillar fungus availability/productivity/revenue | Impacts | 1 | 2072 | KP   |
| 747 | Decreased caterpillar fungus availability/productivity/revenue | Impacts | 1 | 2073 | KP   |
| 748 | Decreased caterpillar fungus availability/productivity/revenue | Impacts | 1 | 2066 | GKP  |
| 749 | Decreased caterpillar fungus availability/productivity/revenue | Impacts | 1 | 2074 | KP   |
| 750 | Decreased caterpillar fungus availability/productivity/revenue | Impacts | 1 | 2073 | AP   |
| 751 | Decreased caterpillar fungus availability/productivity/revenue | Impacts | 1 | 2074 | AP   |
| 752 | Decreased caterpillar fungus availability/productivity/revenue | Impacts | 1 | 2074 | AP   |
| 753 | Decreased caterpillar fungus availability/productivity/revenue | Impacts | 1 | 2070 | Naya |
| 754 | Decreased caterpillar fungus availability/productivity/revenue | Impacts | 1 | 2072 | KP   |
| 755 | Decreased caterpillar fungus availability/productivity/revenue | Impacts | 1 | 2069 | Raj  |
| 756 | Decreased caterpillar fungus availability/productivity/revenue | Impacts | 1 | 2070 | Naya |
| 757 | Decreased caterpillar fungus availability/productivity/revenue | Impacts | 1 | 2074 | GKP  |
| 758 | Decreased caterpillar fungus availability/productivity/revenue | Impacts | 1 | 2073 | KP   |
| 759 | Decreased caterpillar fungus availability/productivity/revenue | Impacts | 1 | 2073 | Raj  |
| 760 | Decreased caterpillar fungus availability/productivity/revenue | Impacts | 1 | 2073 | AP   |
| 761 | Decreased caterpillar fungus availability/productivity/revenue | Impacts | 1 | 2073 | Naya |
| 762 | Decreased caterpillar fungus availability/productivity/revenue | Impacts | 1 | 2074 | KP   |
| 763 | Decreased caterpillar fungus availability/productivity/revenue | Impacts | 1 | 2074 | KP   |
| 764 | Decreased caterpillar fungus availability/productivity/revenue | Impacts | 1 | 2074 | AP   |
| 765 | Decreased caterpillar fungus availability/productivity/revenue | Impacts | 1 | 2070 | KP   |
| 766 | Decreased caterpillar fungus availability/productivity/revenue | Impacts | 1 | 2073 | AP   |
| 767 | Decreased caterpillar fungus availability/productivity/revenue | Impacts | 1 | 2068 | Raj  |
| 768 | Decreased caterpillar fungus availability/productivity/revenue | Impacts | 1 | 2066 | GKP  |
| 769 | Decreased caterpillar fungus availability/productivity/revenue | Impacts | 1 | 2066 | Raj  |
| 770 | Decreased caterpillar fungus availability/productivity/revenue | Impacts | 1 | 2074 | GKP  |
| 771 | Decreased caterpillar fungus availability/productivity/revenue | Impacts | 1 | 2066 | Raj  |
| 772 | Decreased caterpillar fungus availability/productivity/revenue | Impacts | 1 | 2066 | Raj  |
| 773 | Decreased caterpillar fungus availability/productivity/revenue | Impacts | 1 | 2073 | GKP  |
| 774 | Decreased caterpillar fungus availability/productivity/revenue | Impacts | 1 | 2069 | Naya |
| 775 | Decreased caterpillar fungus availability/productivity/revenue | Impacts | 1 | 2071 | Nag  |

|     |                                                                |         |   |      |      |
|-----|----------------------------------------------------------------|---------|---|------|------|
| 776 | Decreased caterpillar fungus availability/productivity/revenue | Impacts | 1 | 2073 | Nag  |
| 777 | Decreased caterpillar fungus availability/productivity/revenue | Impacts | 1 | 2066 | Naya |
| 778 | Decreased caterpillar fungus availability/productivity/revenue | Impacts | 1 | 2073 | Naya |
| 779 | Decreased caterpillar fungus availability/productivity/revenue | Impacts | 1 | 2074 | Naya |
| 780 | Decreased caterpillar fungus availability/productivity/revenue | Impacts | 1 | 2074 | Naya |
| 781 | Decreased caterpillar fungus availability/productivity/revenue | Impacts | 1 | 2071 | Nag  |
| 782 | Decreased caterpillar fungus availability/productivity/revenue | Impacts | 1 | 2072 | Nag  |
| 783 | Decreased caterpillar fungus availability/productivity/revenue | Impacts | 1 | 2072 | Nag  |
| 784 | Decreased caterpillar fungus availability/productivity/revenue | Impacts | 1 | 2073 | Nag  |
| 785 | Decreased caterpillar fungus availability/productivity/revenue | Impacts | 1 | 2074 | Nag  |
| 786 | Decreased caterpillar fungus availability/productivity/revenue | Impacts | 1 | 2070 | GKP  |
| 787 | Decreased caterpillar fungus availability/productivity/revenue | Impacts | 1 | 2070 | GKP  |
| 788 | Decreased caterpillar fungus availability/productivity/revenue | Impacts | 1 | 2070 | KP   |
| 789 | Decreased caterpillar fungus availability/productivity/revenue | Impacts | 1 | 2072 | KP   |
| 790 | Decreased caterpillar fungus availability/productivity/revenue | Impacts | 1 | 2068 | Raj  |
| 791 | Decreased caterpillar fungus availability/productivity/revenue | Impacts | 1 | 2066 | Naya |
| 792 | Decreased caterpillar fungus availability/productivity/revenue | Impacts | 1 | 2069 | Naya |
| 793 | Decreased caterpillar fungus availability/productivity/revenue | Impacts | 1 | 2072 | Nag  |
| 794 | Decreased caterpillar fungus availability/productivity/revenue | Impacts | 1 | 2073 | Nag  |
| 795 | Decreased caterpillar fungus availability/productivity/revenue | Impacts | 1 | 2066 | GKP  |
| 796 | Decreased caterpillar fungus availability/productivity/revenue | Impacts | 1 | 2073 | Nag  |
| 797 | Decreased caterpillar fungus availability/productivity/revenue | Impacts | 1 | 2066 | GKP  |
| 798 | Decreased caterpillar fungus availability/productivity/revenue | Impacts | 1 | 2066 | AP   |
| 799 | Decreased caterpillar fungus availability/productivity/revenue | Impacts | 1 | 2069 | AP   |
| 800 | Decreased caterpillar fungus availability/productivity/revenue | Impacts | 1 | 2069 | AP   |
| 801 | Decreased caterpillar fungus availability/productivity/revenue | Impacts | 1 | 2071 | AP   |
| 802 | Decreased caterpillar fungus availability/productivity/revenue | Impacts | 1 | 2073 | Nag  |
| 803 | Decreased caterpillar fungus availability/productivity/revenue | Impacts | 1 | 2071 | AP   |
| 804 | Decreased caterpillar fungus availability/productivity/revenue | Impacts | 1 | 2066 | Raj  |
| 805 | Decreased caterpillar fungus availability/productivity/revenue | Impacts | 1 | 2068 | Raj  |
| 806 | Decreased caterpillar fungus availability/productivity/revenue | Impacts | 1 | 2071 | Nag  |

|     |                                                                                        |         |   |      |      |
|-----|----------------------------------------------------------------------------------------|---------|---|------|------|
| 807 | Decreased caterpillar fungus availability/productivity/revenue                         | Impacts | 1 | 2071 | AP   |
| 808 | Decreased caterpillar fungus availability/productivity/revenue                         | Impacts | 1 | 2065 | KP   |
| 809 | Decreased caterpillar fungus availability/productivity/revenue                         | Impacts | 1 | 2074 | Naya |
| 810 | Decreased caterpillar fungus availability/productivity/revenue                         | Impacts | 1 | 2073 | GKP  |
| 811 | Decreased caterpillar fungus availability/productivity/revenue                         | Impacts | 1 | 2069 | KP   |
| 812 | Decreased caterpillar fungus availability/productivity/revenue                         | Impacts | 1 | 2075 | GKP  |
| 813 | Decreased caterpillar fungus availability/productivity/revenue                         | Impacts | 1 | 2075 | GKP  |
| 814 | Decreased caterpillar fungus availability/productivity/revenue                         | Impacts | 1 | 2075 | GKP  |
| 815 | Decreased caterpillar fungus availability/productivity/revenue                         | Impacts | 1 | 2075 | GKP  |
| 816 | Decreased caterpillar fungus availability/productivity/revenue                         | Impacts | 1 | 2075 | GKP  |
| 817 | Decreased caterpillar fungus availability/productivity/revenue                         | Impacts | 1 | 2075 | GKP  |
| 818 | Decreased caterpillar fungus availability/productivity/revenue                         | Impacts | 1 | 2075 | GKP  |
| 819 | Decreased caterpillar fungus availability/productivity/revenue                         | Impacts | 1 | 2075 | GKP  |
| 820 | Decreased caterpillar fungus availability/productivity/revenue                         | Impacts | 1 | 2075 | GKP  |
| 823 | Decreased caterpillar fungus availability/productivity/revenue ( harvesters indebted ) | Impacts | 1 | 2071 | Nag  |
| 824 | Decreased caterpillar fungus availability/productivity/revenue ( harvesters indebted ) | Impacts | 1 | 2071 | Nag  |
| 825 | Decreased caterpillar fungus availability/productivity/revenue ( harvesters indebted ) | Impacts | 1 | 2071 | Ka   |
| 826 | Decreased caterpillar fungus availability/productivity/revenue ( harvesters indebted ) | Impacts | 1 | 2069 | Naya |
| 827 | Decreased caterpillar fungus availability/productivity/revenue ( harvesters indebted ) | Impacts | 1 | 2065 | GKP  |
| 828 | Decreased caterpillar fungus availability/productivity/revenue ( harvesters indebted ) | Impacts | 1 | 2068 | KP   |
| 829 | Decreased caterpillar fungus availability/productivity/revenue ( harvesters indebted ) | Impacts | 1 | 2068 | KP   |
| 830 | Decreased caterpillar fungus availability/productivity/revenue ( harvesters indebted ) | Impacts | 1 | 2071 | KP   |

|     |                                                                                                          |         |   |      |      |
|-----|----------------------------------------------------------------------------------------------------------|---------|---|------|------|
| 831 | Decreased caterpillar fungus availability/productivity/revenue ( harvesters indebted )                   | Impacts | 1 | 2071 | KP   |
| 832 | Decreased caterpillar fungus availability/productivity/revenue ( harvesters indebted )                   | Impacts | 1 | 2075 | GKP  |
| 833 | Decreased caterpillar fungus availability/productivity/revenue (in China and Bhutan)                     | Impacts | 1 | 2071 | KP   |
| 834 | Decreased caterpillar fungus availability/productivity/revenue (leads harvester return empty hand)       | Impacts | 1 | 2073 | KP   |
| 835 | Decreased caterpillar fungus availability/productivity/revenue (leads harvester return empty hand)       | Impacts | 1 | 2072 | AP   |
| 836 | Decreased caterpillar fungus availability/productivity/revenue (leads harvester return empty hand)       | Impacts | 1 | 2075 | GKP  |
| 837 | Decreased caterpillar fungus availability/productivity/revenue (leads harvester return empty hand)       | Impacts | 1 | 2068 | Ka   |
| 838 | Decreased caterpillar fungus availability/productivity/revenue (leads harvesters for foreign employment) | Impacts | 1 | 2068 | Raj  |
| 839 | Decreased caterpillar fungus availability/productivity/revenue (leads harvesters for foreign employment) | Impacts | 1 | 2070 | Raj  |
| 840 | Decreased caterpillar fungus availability/productivity/revenue (leads harvesters migrate towards India)  | Impacts | 1 | 2070 | Raj  |
| 841 | Decreased caterpillar fungus availability/productivity/revenue (leads harvesters migrate towards India)  | Impacts | 1 | 2067 | Naya |
| 842 | Decreased caterpillar fungus availability/productivity/revenue (leads harvesters migrate towards India)  | Impacts | 1 | 2068 | Naya |
| 843 | Decreased caterpillar fungus availability/productivity/revenue (leads harvesters migrate towards India)  | Impacts | 1 | 2067 | Nag  |
| 844 | Decreased caterpillar fungus availability/productivity/revenue (leads harvesters migrate towards India)  | Impacts | 1 | 2067 | Nag  |
| 845 | Decreased caterpillar fungus availability/productivity/revenue (more buyers)                             | Impacts | 1 | 2068 | Nag  |
| 846 | Decreased caterpillar fungus availability/productivity/revenue (resonated with climate change)           | Impacts | 1 | 2071 | KP   |

|     |                                                                                                |            |   |      |      |
|-----|------------------------------------------------------------------------------------------------|------------|---|------|------|
| 847 | Decreased caterpillar fungus availability/productivity/revenue (resonated with climate change) | Impacts    | 1 | 2071 | KP   |
| 848 | Decreased caterpillar fungus availability/productivity/revenue (resonated with climate change) | Impacts    | 1 | 2071 | KP   |
| 849 | Decreased caterpillar fungus availability/productivity/revenue (resonated with climate change) | Impacts    | 1 | 2075 | GKP  |
| 850 | Decreased caterpillar fungus availability/productivity/revenue (resonated with climate change) | Impacts    | 1 | 2075 | GKP  |
| 851 | Decreased caterpillar fungus availability/productivity/revenue                                 | Impacts    | 1 | 2078 | Nag  |
| 852 | Decreased caterpillar fungus availability/productivity/revenue                                 | Impacts    | 1 | 2077 | Nag  |
| 853 | Decreased caterpillar fungus availability/productivity/revenue                                 | Impacts    | 1 | 2076 | Naya |
| 854 | Decreased caterpillar fungus availability/productivity/revenue                                 | Impacts    | 1 | 2076 | Naya |
| 855 | Decreased caterpillar fungus availability/productivity/revenue                                 | Impacts    | 1 | 2076 | Naya |
| 856 | Decreased caterpillar fungus availability/productivity/revenue                                 | Impacts    | 1 | 2076 | Naya |
| 857 | Decreased caterpillar fungus availability/productivity/revenue                                 | Impacts    | 1 | 2078 | Naya |
| 858 | Decreased caterpillar fungus availability/productivity/revenue                                 | Impacts    | 1 | 2078 | Naya |
| 859 | Decreased caterpillar fungus availability/productivity/revenue                                 | Impacts    | 1 | 2078 | Naya |
| 860 | Decreased caterpillar fungus availability/productivity/revenue                                 | Impacts    | 1 | 2074 | RAJ  |
| 861 | Decreased caterpillar fungus availability/productivity/revenue                                 | Impacts    | 1 | 2067 | Ka   |
| 862 | Decreased caterpillar fungus availability/productivity/revenue                                 | Impacts    | 1 | 2067 | Ka   |
| 863 | Decreased caterpillar fungus availability/productivity/revenue                                 | Impacts    | 1 | 2068 | Ka   |
| 864 | Decreased caterpillar fungus availability/productivity/revenue                                 | Impacts    | 1 | 2076 | Ka   |
| 865 | Decreased caterpillar fungus availability/productivity/revenue                                 | Impacts    | 1 | 2077 | Ka   |
| 866 | Decreased caterpillar fungus availability/productivity/revenue                                 | Impacts    | 1 | 2078 | Ka   |
| 867 | Decreased caterpillar fungus availability/productivity/revenue                                 | Impacts    | 1 | 2076 | Nag  |
| 868 | Decreased caterpillar fungus availability/productivity/revenue                                 | Impacts    | 1 | 2078 | Nag  |
| 869 | Decreased flow of harvesters                                                                   | Harvesting | 1 | 2073 | Ka   |
| 870 | Decreased flow of harvesters                                                                   | Harvesting | 1 | 2073 | GKP  |
| 871 | Decreased flow of harvesters                                                                   | Harvesting | 1 | 2074 | GKP  |
| 872 | Decreased flow of harvesters                                                                   | Harvesting | 1 | 2065 | KP   |
| 873 | Decreased flow of harvesters                                                                   | Harvesting | 1 | 2073 | AP   |

|     |                                                                |            |   |      |      |
|-----|----------------------------------------------------------------|------------|---|------|------|
| 874 | Decreased flow of harvesters                                   | Harvesting | 1 | 2074 | AP   |
| 875 | Decreased flow of harvesters                                   | Harvesting | 1 | 2067 | Nag  |
| 876 | Decreased flow of harvesters                                   | Harvesting | 1 | 2069 | KP   |
| 877 | Decreased flow of harvesters                                   | Harvesting | 1 | 2071 | KP   |
| 878 | Decreased flow of harvesters                                   | Harvesting | 1 | 2074 | Naya |
| 879 | Decreased flow of harvesters                                   | Harvesting | 1 | 2073 | Nag  |
| 880 | Decreased flow of harvesters                                   | Harvesting | 1 | 2073 | Nag  |
| 881 | Decreased flow of harvesters                                   | Harvesting | 1 | 2067 | Nag  |
| 882 | Decreased flow of harvesters                                   | Harvesting | 1 | 2073 | KP   |
| 883 | Decreased flow of harvesters                                   | Harvesting | 1 | 2071 | Nag  |
| 884 | Decreased flow of harvesters                                   | Harvesting | 1 | 2075 | GKP  |
| 885 | Decreased flow of harvesters (due to disaster)                 | Harvesting | 1 | 2071 | Nag  |
| 886 | Decreased flow of harvesters (from outside district)           | Harvesting | 1 | 2065 | KP   |
| 887 | Decreased flow of harvesters (from outside district)           | Harvesting | 1 | 2070 | GKP  |
| 888 | Decreased flow of harvesters (lead hotel closure)              | Harvesting | 1 | 2070 | GKP  |
| 889 | Decreased flow of harvesters (price fall)                      | Harvesting | 1 | 2070 | GKP  |
| 890 | Decreased flow of harvesters (price fall)                      | Harvesting | 1 | 2075 | GKP  |
| 891 | Decreased flow of harvesters (price fall)                      | Harvesting | 1 | 2075 | GKP  |
| 892 | Decreased flow of harvesters (price fall)                      | Harvesting | 1 | 2067 | Ka   |
| 893 | Decreased investment of traders to purchase caterpillar fungus | Trade      | 1 | 2071 | GKP  |
| 894 | Decreased price of caterpillar fungus                          | Trade      | 1 | 2072 | GKP  |
| 895 | Decreased price of caterpillar fungus                          | Trade      | 1 | 2073 | GKP  |
| 896 | Decreased price of caterpillar fungus                          | Trade      | 1 | 2073 | GKP  |
| 897 | Decreased price of caterpillar fungus                          | Trade      | 1 | 2074 | GKP  |
| 898 | Decreased price of caterpillar fungus                          | Trade      | 1 | 2070 | Naya |
| 899 | Decreased price of caterpillar fungus                          | Trade      | 1 | 2070 | AP   |
| 900 | Decreased price of caterpillar fungus                          | Trade      | 1 | 2073 | GKP  |
| 901 | Decreased traders to purchase caterpillar fungus               | Trade      | 1 | 2074 | AP   |
| 902 | Demand (high) of caterpillar fungus                            | Trade      | 1 | 2070 | KP   |
| 903 | Demand (high) of caterpillar fungus                            | Trade      | 1 | 2072 | KP   |
| 904 | Demand (high) of caterpillar fungus                            | Trade      | 1 | 2070 | KP   |



|     |                                                                           |            |   |      |      |
|-----|---------------------------------------------------------------------------|------------|---|------|------|
| 905 | Demand (high) of caterpillar fungus                                       | Trade      | 1 | 2071 | Ka   |
| 906 | Demand (high) of caterpillar fungus                                       | Trade      | 1 | 2075 | GKP  |
| 907 | Demand (high) of caterpillar fungus                                       | Trade      | 1 | 2075 | GKP  |
| 908 | Demand (high) of caterpillar fungus                                       | Trade      | 1 | 2076 | Naya |
| 909 | Demand (high) of caterpillar fungus                                       | Trade      | 1 | 2078 | Naya |
| 910 | Demand (high) of caterpillar fungus                                       | Trade      | 1 | 2078 | Naya |
| 911 | Demographic information of harvesters                                     | Harvesting | 1 | 2071 | Ka   |
| 912 | Demographic information of harvesters                                     | Harvesting | 1 | 2071 | Nag  |
| 913 | Demographic information of harvesters                                     | Harvesting | 1 | 2075 | GKP  |
| 914 | Demographic information of harvesters                                     | Harvesting | 1 | 2075 | GKP  |
| 915 | Determination of collection fee                                           | Governance | 1 | 2065 | AP   |
| 916 | Different revenue rates of caterpillar fungus                             | Governance | 1 | 2066 | AP   |
| 917 | Different revenue rates of caterpillar fungus                             | Governance | 1 | 2066 | AP   |
| 918 | Different revenue rates of caterpillar fungus                             | Governance | 1 | 2066 | AP   |
| 919 | Different revenue rates of caterpillar fungus                             | Governance | 1 | 2070 | AP   |
| 920 | Different revenue rates of caterpillar fungus                             | Governance | 1 | 2071 | AP   |
| 921 | Different revenue rates of caterpillar fungus                             | Governance | 1 | 2071 | AP   |
| 922 | Different revenue rates of caterpillar fungus                             | Governance | 1 | 2073 | AP   |
| 923 | Different revenue rates of caterpillar fungus                             | Governance | 1 | 2073 | AP   |
| 924 | Different revenue rates of caterpillar fungus                             | Governance | 1 | 2073 | AP   |
| 925 | Different revenue rates of caterpillar fungus                             | Governance | 1 | 2074 | AP   |
| 926 | Different revenue rates of caterpillar fungus                             | Governance | 1 | 2074 | AP   |
| 927 | Different revenue rates of caterpillar fungus                             | Governance | 1 | 2074 | AP   |
| 928 | Different revenue rates of caterpillar fungus                             | Governance | 1 | 2074 | AP   |
| 929 | Different revenue rates of caterpillar fungus                             | Governance | 1 | 2065 | GKP  |
| 930 | Different revenue rates of caterpillar fungus                             | Governance | 1 | 2066 | GKP  |
| 931 | Different revenue rates of caterpillar fungus                             | Governance | 1 | 2067 | GKP  |
| 932 | Different revenue rates of caterpillar fungus                             | Governance | 1 | 2070 | GKP  |
| 933 | Different types (local, distant) of entry fees for harvesters and traders | Governance | 1 | 2070 | GKP  |
| 934 | Different types (local, distant) of entry fees for harvesters and traders | Governance | 1 | 2070 | GKP  |
| 935 | Different types (local, distant) of entry fees for harvesters and traders | Governance | 1 | 2071 | Naya |



|     |                                                                                |             |   |      |      |
|-----|--------------------------------------------------------------------------------|-------------|---|------|------|
| 967 | Different types (local, distant) of entry fees for harvesters and traders      | Governance  | 1 | 2075 | GKP  |
| 968 | Different types (local, distant) of entry fees for harvesters and traders      | Governance  | 1 | 2075 | GKP  |
| 969 | Disagreement in price of caterpillar fungus between harvesters and contractors | Impacts     | 1 | 2073 | Ka   |
| 970 | Disaster while harvesting in the pasture                                       | Challenges  | 1 | 2073 | Ka   |
| 971 | Disproportionate revenue sharing of revenue by local authority                 | Governance  | 1 | 2067 | Raj  |
| 972 | Disproportionate revenue sharing of revenue by local authority                 | Governance  | 1 | 2067 | Raj  |
| 973 | Disproportionate revenue sharing of revenue by local authority                 | Governance  | 1 | 2067 | Raj  |
| 974 | Distribution of caterpillar fungus                                             | Information | 1 | 2069 | Raj  |
| 975 | Distribution of caterpillar fungus                                             | Information | 1 | 2069 | Raj  |
| 976 | Distribution of caterpillar fungus                                             | Information | 1 | 2069 | Raj  |
| 977 | Distribution of caterpillar fungus                                             | Information | 1 | 2069 | Raj  |
| 978 | Distribution of caterpillar fungus                                             | Information | 1 | 2069 | Raj  |
| 979 | Distribution of caterpillar fungus                                             | Information | 1 | 2069 | Raj  |
| 980 | Distribution of caterpillar fungus                                             | Information | 1 | 2070 | Raj  |
| 981 | Distribution of caterpillar fungus                                             | Information | 1 | 2070 | Raj  |
| 982 | Distribution of caterpillar fungus                                             | Information | 1 | 2070 | Raj  |
| 983 | Distribution of caterpillar fungus                                             | Information | 1 | 2070 | Raj  |
| 984 | Distribution of caterpillar fungus                                             | Information | 1 | 2071 | Raj  |
| 985 | Distribution of caterpillar fungus                                             | Information | 1 | 2065 | Naya |
| 986 | Distribution of caterpillar fungus                                             | Information | 1 | 2065 | Naya |
| 987 | Distribution of caterpillar fungus                                             | Information | 1 | 2065 | Naya |
| 988 | Distribution of caterpillar fungus                                             | Information | 1 | 2065 | Naya |
| 989 | Distribution of caterpillar fungus                                             | Information | 1 | 2066 | Naya |
| 990 | Distribution of caterpillar fungus                                             | Information | 1 | 2066 | Naya |
| 991 | Distribution of caterpillar fungus                                             | Information | 1 | 2067 | Naya |
| 992 | Distribution of caterpillar fungus                                             | Information | 1 | 2072 | Naya |
| 993 | Distribution of caterpillar fungus                                             | Information | 1 | 2072 | Naya |
| 994 | Distribution of caterpillar fungus                                             | Information | 1 | 2072 | Naya |
| 995 | Distribution of caterpillar fungus                                             | Information | 1 | 2072 | Naya |
| 996 | Distribution of caterpillar fungus                                             | Information | 1 | 2066 | Nag  |

|      |                                    |             |   |      |      |
|------|------------------------------------|-------------|---|------|------|
| 997  | Distribution of caterpillar fungus | Information | 1 | 2067 | Nag  |
| 998  | Distribution of caterpillar fungus | Information | 1 | 2067 | Nag  |
| 999  | Distribution of caterpillar fungus | Information | 1 | 2067 | Nag  |
| 1000 | Distribution of caterpillar fungus | Information | 1 | 2074 | Nag  |
| 1001 | Distribution of caterpillar fungus | Information | 1 | 2074 | Nag  |
| 1002 | Distribution of caterpillar fungus | Information | 1 | 2068 | KP   |
| 1003 | Distribution of caterpillar fungus | Information | 1 | 2068 | KP   |
| 1004 | Distribution of caterpillar fungus | Information | 1 | 2073 | Naya |
| 1005 | Distribution of caterpillar fungus | Information | 1 | 2073 | Naya |
| 1006 | Distribution of caterpillar fungus | Information | 1 | 2073 | Naya |
| 1007 | Distribution of caterpillar fungus | Information | 1 | 2073 | Naya |
| 1008 | Distribution of caterpillar fungus | Information | 1 | 2073 | Naya |
| 1009 | Distribution of caterpillar fungus | Information | 1 | 2066 | Raj  |
| 1010 | Distribution of caterpillar fungus | Information | 1 | 2066 | Raj  |
| 1011 | Distribution of caterpillar fungus | Information | 1 | 2066 | Raj  |
| 1012 | Distribution of caterpillar fungus | Information | 1 | 2070 | Naya |
| 1013 | Distribution of caterpillar fungus | Information | 1 | 2069 | Naya |
| 1014 | Distribution of caterpillar fungus | Information | 1 | 2069 | Naya |
| 1015 | Distribution of caterpillar fungus | Information | 1 | 2069 | Naya |
| 1016 | Distribution of caterpillar fungus | Information | 1 | 2069 | Naya |
| 1017 | Distribution of caterpillar fungus | Information | 1 | 2069 | Naya |
| 1018 | Distribution of caterpillar fungus | Information | 1 | 2069 | Naya |
| 1019 | Distribution of caterpillar fungus | Information | 1 | 2069 | Naya |
| 1020 | Distribution of caterpillar fungus | Information | 1 | 2069 | Naya |
| 1021 | Distribution of caterpillar fungus | Information | 1 | 2068 | Nag  |
| 1022 | Distribution of caterpillar fungus | Information | 1 | 2068 | Nag  |
| 1023 | Distribution of caterpillar fungus | Information | 1 | 2068 | Nag  |
| 1024 | Distribution of caterpillar fungus | Information | 1 | 2068 | Nag  |
| 1025 | Distribution of caterpillar fungus | Information | 1 | 2069 | Nag  |
| 1026 | Distribution of caterpillar fungus | Information | 1 | 2069 | Nag  |
| 1027 | Distribution of caterpillar fungus | Information | 1 | 2069 | Nag  |

|      |                                    |             |   |      |     |
|------|------------------------------------|-------------|---|------|-----|
| 1028 | Distribution of caterpillar fungus | Information | 1 | 2069 | Nag |
| 1029 | Distribution of caterpillar fungus | Information | 1 | 2070 | Nag |
| 1030 | Distribution of caterpillar fungus | Information | 1 | 2071 | Nag |
| 1031 | Distribution of caterpillar fungus | Information | 1 | 2071 | Nag |
| 1032 | Distribution of caterpillar fungus | Information | 1 | 2071 | Nag |
| 1033 | Distribution of caterpillar fungus | Information | 1 | 2071 | Nag |
| 1034 | Distribution of caterpillar fungus | Information | 1 | 2071 | Nag |
| 1035 | Distribution of caterpillar fungus | Information | 1 | 2071 | Nag |
| 1036 | Distribution of caterpillar fungus | Information | 1 | 2071 | Nag |
| 1037 | Distribution of caterpillar fungus | Information | 1 | 2071 | Nag |
| 1038 | Distribution of caterpillar fungus | Information | 1 | 2071 | Nag |
| 1039 | Distribution of caterpillar fungus | Information | 1 | 2071 | Nag |
| 1040 | Distribution of caterpillar fungus | Information | 1 | 2071 | Nag |
| 1041 | Distribution of caterpillar fungus | Information | 1 | 2072 | Nag |
| 1042 | Distribution of caterpillar fungus | Information | 1 | 2072 | Nag |
| 1043 | Distribution of caterpillar fungus | Information | 1 | 2065 | KP  |
| 1044 | Distribution of caterpillar fungus | Information | 1 | 2065 | KP  |
| 1045 | Distribution of caterpillar fungus | Information | 1 | 2065 | KP  |
| 1046 | Distribution of caterpillar fungus | Information | 1 | 2065 | KP  |
| 1047 | Distribution of caterpillar fungus | Information | 1 | 2065 | KP  |
| 1048 | Distribution of caterpillar fungus | Information | 1 | 2065 | KP  |
| 1049 | Distribution of caterpillar fungus | Information | 1 | 2065 | KP  |
| 1050 | Distribution of caterpillar fungus | Information | 1 | 2065 | KP  |
| 1051 | Distribution of caterpillar fungus | Information | 1 | 2065 | KP  |
| 1052 | Distribution of caterpillar fungus | Information | 1 | 2065 | KP  |
| 1053 | Distribution of caterpillar fungus | Information | 1 | 2065 | KP  |
| 1054 | Distribution of caterpillar fungus | Information | 1 | 2065 | KP  |
| 1055 | Distribution of caterpillar fungus | Information | 1 | 2066 | KP  |
| 1056 | Distribution of caterpillar fungus | Information | 1 | 2067 | KP  |
| 1057 | Distribution of caterpillar fungus | Information | 1 | 2070 | KP  |
| 1058 | Distribution of caterpillar fungus | Information | 1 | 2070 | KP  |

|      |                                    |             |   |      |      |
|------|------------------------------------|-------------|---|------|------|
| 1059 | Distribution of caterpillar fungus | Information | 1 | 2070 | KP   |
| 1060 | Distribution of caterpillar fungus | Information | 1 | 2070 | KP   |
| 1061 | Distribution of caterpillar fungus | Information | 1 | 2072 | KP   |
| 1062 | Distribution of caterpillar fungus | Information | 1 | 2072 | KP   |
| 1063 | Distribution of caterpillar fungus | Information | 1 | 2072 | KP   |
| 1064 | Distribution of caterpillar fungus | Information | 1 | 2072 | KP   |
| 1065 | Distribution of caterpillar fungus | Information | 1 | 2072 | KP   |
| 1066 | Distribution of caterpillar fungus | Information | 1 | 2072 | KP   |
| 1067 | Distribution of caterpillar fungus | Information | 1 | 2072 | KP   |
| 1068 | Distribution of caterpillar fungus | Information | 1 | 2073 | KP   |
| 1069 | Distribution of caterpillar fungus | Information | 1 | 2073 | KP   |
| 1070 | Distribution of caterpillar fungus | Information | 1 | 2074 | KP   |
| 1071 | Distribution of caterpillar fungus | Information | 1 | 2074 | KP   |
| 1072 | Distribution of caterpillar fungus | Information | 1 | 2074 | KP   |
| 1073 | Distribution of caterpillar fungus | Information | 1 | 2074 | KP   |
| 1074 | Distribution of caterpillar fungus | Information | 1 | 2074 | KP   |
| 1075 | Distribution of caterpillar fungus | Information | 1 | 2068 | Naya |
| 1076 | Distribution of caterpillar fungus | Information | 1 | 2074 | Naya |
| 1077 | Distribution of caterpillar fungus | Information | 1 | 2073 | Nag  |
| 1078 | Distribution of caterpillar fungus | Information | 1 | 2073 | Nag  |
| 1079 | Distribution of caterpillar fungus | Information | 1 | 2073 | Nag  |
| 1080 | Distribution of caterpillar fungus | Information | 1 | 2073 | Nag  |
| 1081 | Distribution of caterpillar fungus | Information | 1 | 2073 | Nag  |
| 1082 | Distribution of caterpillar fungus | Information | 1 | 2073 | Nag  |
| 1083 | Distribution of caterpillar fungus | Information | 1 | 2073 | Nag  |
| 1084 | Distribution of caterpillar fungus | Information | 1 | 2073 | Nag  |
| 1085 | Distribution of caterpillar fungus | Information | 1 | 2073 | Nag  |
| 1086 | Distribution of caterpillar fungus | Information | 1 | 2066 | Raj  |
| 1087 | Distribution of caterpillar fungus | Information | 1 | 2066 | Raj  |
| 1088 | Distribution of caterpillar fungus | Information | 1 | 2066 | Raj  |
| 1089 | Distribution of caterpillar fungus | Information | 1 | 2066 | Raj  |

|      |                                    |             |   |      |      |
|------|------------------------------------|-------------|---|------|------|
| 1090 | Distribution of caterpillar fungus | Information | 1 | 2073 | Raj  |
| 1091 | Distribution of caterpillar fungus | Information | 1 | 2073 | Raj  |
| 1092 | Distribution of caterpillar fungus | Information | 1 | 2074 | Raj  |
| 1093 | Distribution of caterpillar fungus | Information | 1 | 2071 | KP   |
| 1094 | Distribution of caterpillar fungus | Information | 1 | 2071 | KP   |
| 1095 | Distribution of caterpillar fungus | Information | 1 | 2071 | KP   |
| 1096 | Distribution of caterpillar fungus | Information | 1 | 2071 | KP   |
| 1097 | Distribution of caterpillar fungus | Information | 1 | 2071 | KP   |
| 1098 | Distribution of caterpillar fungus | Information | 1 | 2071 | KP   |
| 1099 | Distribution of caterpillar fungus | Information | 1 | 2071 | KP   |
| 1100 | Distribution of caterpillar fungus | Information | 1 | 2071 | KP   |
| 1101 | Distribution of caterpillar fungus | Information | 1 | 2071 | KP   |
| 1102 | Distribution of caterpillar fungus | Information | 1 | 2067 | AP   |
| 1103 | Distribution of caterpillar fungus | Information | 1 | 2071 | KP   |
| 1104 | Distribution of caterpillar fungus | Information | 1 | 2070 | KP   |
| 1105 | Distribution of caterpillar fungus | Information | 1 | 2073 | GKP  |
| 1106 | Distribution of caterpillar fungus | Information | 1 | 2073 | GKP  |
| 1107 | Distribution of caterpillar fungus | Information | 1 | 2073 | GKP  |
| 1108 | Distribution of caterpillar fungus | Information | 1 | 2074 | GKP  |
| 1109 | Distribution of caterpillar fungus | Information | 1 | 2068 | KP   |
| 1110 | Distribution of caterpillar fungus | Information | 1 | 2069 | KP   |
| 1111 | Distribution of caterpillar fungus | Information | 1 | 2069 | KP   |
| 1112 | Distribution of caterpillar fungus | Information | 1 | 2071 | Raj  |
| 1113 | Distribution of caterpillar fungus | Information | 1 | 2073 | KP   |
| 1114 | Distribution of caterpillar fungus | Information | 1 | 2067 | Raj  |
| 1115 | Distribution of caterpillar fungus | Information | 1 | 2072 | Naya |
| 1116 | Distribution of caterpillar fungus | Information | 1 | 2065 | Raj  |
| 1117 | Distribution of caterpillar fungus | Information | 1 | 2069 | Nag  |
| 1118 | Distribution of caterpillar fungus | Information | 1 | 2065 | KP   |
| 1119 | Distribution of caterpillar fungus | Information | 1 | 2071 | Raj  |
| 1120 | Distribution of caterpillar fungus | Information | 1 | 2067 | Raj  |

|      |                                    |             |   |      |      |
|------|------------------------------------|-------------|---|------|------|
| 1121 | Distribution of caterpillar fungus | Information | 1 | 2066 | Naya |
| 1122 | Distribution of caterpillar fungus | Information | 1 | 2074 | Naya |
| 1123 | Distribution of caterpillar fungus | Information | 1 | 2071 | Nag  |
| 1124 | Distribution of caterpillar fungus | Information | 1 | 2074 | KP   |
| 1125 | Distribution of caterpillar fungus | Information | 1 | 2074 | KP   |
| 1126 | Distribution of caterpillar fungus | Information | 1 | 2074 | KP   |
| 1127 | Distribution of caterpillar fungus | Information | 1 | 2072 | KP   |
| 1128 | Distribution of caterpillar fungus | Information | 1 | 2067 | Naya |
| 1129 | Distribution of caterpillar fungus | Information | 1 | 2071 | Nag  |
| 1130 | Distribution of caterpillar fungus | Information | 1 | 2071 | Nag  |
| 1131 | Distribution of caterpillar fungus | Information | 1 | 2073 | GKP  |
| 1132 | Distribution of caterpillar fungus | Information | 1 | 2070 | KP   |
| 1133 | Distribution of caterpillar fungus | Information | 1 | 2071 | Nag  |
| 1134 | Distribution of caterpillar fungus | Information | 1 | 2071 | Nag  |
| 1135 | Distribution of caterpillar fungus | Information | 1 | 2072 | Nag  |
| 1136 | Distribution of caterpillar fungus | Information | 1 | 2074 | KP   |
| 1137 | Distribution of caterpillar fungus | Information | 1 | 2072 | AP   |
| 1138 | Distribution of caterpillar fungus | Information | 1 | 2066 | AP   |
| 1139 | Distribution of caterpillar fungus | Information | 1 | 2069 | AP   |
| 1140 | Distribution of caterpillar fungus | Information | 1 | 2071 | AP   |
| 1141 | Distribution of caterpillar fungus | Information | 1 | 2071 | AP   |
| 1142 | Distribution of caterpillar fungus | Information | 1 | 2074 | AP   |
| 1143 | Distribution of caterpillar fungus | Information | 1 | 2071 | Ka   |
| 1144 | Distribution of caterpillar fungus | Information | 1 | 2071 | Ka   |
| 1145 | Distribution of caterpillar fungus | Information | 1 | 2072 | Ka   |
| 1146 | Distribution of caterpillar fungus | Information | 1 | 2074 | Ka   |
| 1147 | Distribution of caterpillar fungus | Information | 1 | 2065 | Raj  |
| 1148 | Distribution of caterpillar fungus | Information | 1 | 2065 | Raj  |
| 1149 | Distribution of caterpillar fungus | Information | 1 | 2065 | Raj  |
| 1150 | Distribution of caterpillar fungus | Information | 1 | 2066 | Raj  |
| 1151 | Distribution of caterpillar fungus | Information | 1 | 2066 | Raj  |



|      |                                                                                               |             |   |      |      |
|------|-----------------------------------------------------------------------------------------------|-------------|---|------|------|
| 1152 | Distribution of caterpillar fungus                                                            | Information | 1 | 2068 | Raj  |
| 1153 | Distribution of caterpillar fungus                                                            | Information | 1 | 2068 | Raj  |
| 1154 | Distribution of caterpillar fungus                                                            | Information | 1 | 2068 | Raj  |
| 1155 | Distribution of caterpillar fungus                                                            | Information | 1 | 2068 | Raj  |
| 1156 | Distribution of caterpillar fungus                                                            | Information | 1 | 2070 | Raj  |
| 1157 | Distribution of caterpillar fungus                                                            | Information | 1 | 2072 | Raj  |
| 1158 | Distribution of caterpillar fungus                                                            | Information | 1 | 2070 | Naya |
| 1159 | Distribution of caterpillar fungus                                                            | Information | 1 | 2072 | Naya |
| 1160 | Distribution of caterpillar fungus                                                            | Information | 1 | 2073 | Naya |
| 1161 | Distribution of caterpillar fungus                                                            | Information | 1 | 2070 | Nag  |
| 1162 | Distribution of caterpillar fungus                                                            | Information | 1 | 2071 | Nag  |
| 1163 | Distribution of caterpillar fungus                                                            | Information | 1 | 2076 | AP   |
| 1164 | Documentary of caterpillar fungus                                                             | Impacts     | 1 | 2071 | Nag  |
| 1165 | Documentary of caterpillar fungus                                                             | Impacts     | 1 | 2071 | Nag  |
| 1166 | Documentary of caterpillar fungus                                                             | Impacts     | 1 | 2068 | GKP  |
| 1167 | Documentary of caterpillar fungus                                                             | Impacts     | 1 | 2068 | GKP  |
| 1168 | Drought impacts on caterpillar fungus harvesting (more harvesters, restriction in collection) | Information | 1 | 2070 | GKP  |
| 1169 | Drought impacts on caterpillar fungus harvesting (more harvesters, restriction in collection) | Information | 1 | 2071 | GKP  |
| 1170 | Drought impacts on caterpillar fungus harvesting (more harvesters, restriction in collection) | Information | 1 | 2078 | KP   |
| 1171 | Duration to reach the pasture reported                                                        | Harvesting  | 1 | 2072 | GKP  |
| 1172 | Duration to reach the pasture reported                                                        | Harvesting  | 1 | 2065 | KP   |
| 1173 | Duration to reach the pasture reported                                                        | Harvesting  | 1 | 2068 | KP   |
| 1174 | Earthquake affected harvesting                                                                | Challenges  | 1 | 2068 | KP   |
| 1175 | Economic value (high) of caterpillar fungus                                                   | Information | 1 | 2068 | KP   |
| 1176 | Economic value (high) of caterpillar fungus                                                   | Information | 1 | 2069 | KP   |
| 1177 | Economic value (high) of caterpillar fungus                                                   | Information | 1 | 2069 | KP   |
| 1178 | Economic value (high) of caterpillar fungus                                                   | Information | 1 | 2070 | KP   |
| 1179 | Economic value (high) of caterpillar fungus                                                   | Information | 1 | 2071 | KP   |



|      |                                             |             |   |      |      |
|------|---------------------------------------------|-------------|---|------|------|
| 1211 | Economic value (high) of caterpillar fungus | Information | 1 | 2077 | GKP  |
| 1212 | Economic value (high) of caterpillar fungus | Information | 1 | 2077 | GKP  |
| 1213 | Economic value (high) of caterpillar fungus | Information | 1 | 2077 | GKP  |
| 1214 | Economic value (high) of caterpillar fungus | Information | 1 | 2077 | GKP  |
| 1215 | Economic value (high) of caterpillar fungus | Information | 1 | 2077 | GKP  |
| 1216 | Economic value (high) of caterpillar fungus | Information | 1 | 2077 | GKP  |
| 1217 | Economic value (high) of caterpillar fungus | Information | 1 | 2077 | GKP  |
| 1218 | Economic value (high) of caterpillar fungus | Information | 1 | 2077 | GKP  |
| 1219 | Economic value (high) of caterpillar fungus | Information | 1 | 2078 | Nag  |
| 1220 | Economic value (high) of caterpillar fungus | Information | 1 | 2078 | KP   |
| 1221 | Economic value (high) of caterpillar fungus | Information | 1 | 2078 | KP   |
| 1222 | Economic value (high) of caterpillar fungus | Information | 1 | 2078 | KP   |
| 1223 | Economic value (high) of caterpillar fungus | Information | 1 | 2074 | Naya |
| 1224 | Economic value (high) of caterpillar fungus | Information | 1 | 2074 | Naya |
| 1225 | Economic value (high) of caterpillar fungus | Information | 1 | 2074 | Naya |
| 1226 | Economic value (high) of caterpillar fungus | Information | 1 | 2074 | Naya |
| 1227 | Economic value (high) of caterpillar fungus | Information | 1 | 2076 | Naya |
| 1228 | Economic value (high) of caterpillar fungus | Information | 1 | 2076 | Naya |
| 1229 | Economic value (high) of caterpillar fungus | Information | 1 | 2076 | Naya |
| 1230 | Economic value (high) of caterpillar fungus | Information | 1 | 2076 | Naya |
| 1231 | Economic value (high) of caterpillar fungus | Information | 1 | 2076 | Naya |
| 1232 | Economic value (high) of caterpillar fungus | Information | 1 | 2076 | Naya |
| 1233 | Economic value (high) of caterpillar fungus | Information | 1 | 2078 | Naya |
| 1234 | Economic value (high) of caterpillar fungus | Information | 1 | 2078 | Naya |
| 1235 | Economic value (high) of caterpillar fungus | Information | 1 | 2078 | Naya |
| 1236 | Economic value (high) of caterpillar fungus | Information | 1 | 2078 | Naya |
| 1237 | Economic value (high) of caterpillar fungus | Information | 1 | 2078 | Naya |
| 1238 | Economic value (high) of caterpillar fungus | Information | 1 | 2078 | Naya |
| 1239 | Economic value (high) of caterpillar fungus | Information | 1 | 2078 | Naya |
| 1240 | Economic value (high) of caterpillar fungus | Information | 1 | 2078 | Naya |
| 1241 | Economic value (high) of caterpillar fungus | Information | 1 | 2078 | Naya |

|      |                                                          |             |   |      |      |
|------|----------------------------------------------------------|-------------|---|------|------|
| 1242 | Economic value (high) of caterpillar fungus              | Information | 1 | 2078 | Naya |
| 1243 | Economic value (high) of caterpillar fungus              | Information | 1 | 2078 | Naya |
| 1244 | Economic value (high) of caterpillar fungus              | Information | 1 | 2068 | Ka   |
| 1245 | Economic value (high) of caterpillar fungus              | Information | 1 | 2068 | Ka   |
| 1246 | Economic value (high) of caterpillar fungus              | Information | 1 | 2068 | Ka   |
| 1247 | Economic value (high) of caterpillar fungus              | Information | 1 | 2076 | Ka   |
| 1248 | Economic value (high) of caterpillar fungus              | Information | 1 | 2077 | Ka   |
| 1249 | Economic value (high) of caterpillar fungus              | Information | 1 | 2077 | Ka   |
| 1250 | Economic value (high) of caterpillar fungus              | Information | 1 | 2077 | Ka   |
| 1251 | Economic value (high) of caterpillar fungus              | Information | 1 | 2077 | Ka   |
| 1252 | Economic value (high) of caterpillar fungus              | Information | 1 | 2077 | Ka   |
| 1253 | Economy boost by better management of caterpillar fungus | Information | 1 | 2077 | GKP  |
| 1254 | Economy boost by better management of caterpillar fungus | Information | 1 | 2077 | GKP  |
| 1255 | Economy boost by better management of caterpillar fungus | Information | 1 | 2077 | GKP  |
| 1256 | Economy boost by better management of caterpillar fungus | Information | 1 | 2071 | KP   |
| 1257 | Economy boost by better management of caterpillar fungus | Information | 1 | 2071 | KP   |
| 1258 | Economy boost by better management of caterpillar fungus | Information | 1 | 2072 | KP   |
| 1259 | Empty villages due to migration to the pastures          | Impacts     | 1 | 2072 | KP   |
| 1260 | Empty villages due to migration to the pastures          | Impacts     | 1 | 2072 | KP   |
| 1261 | Empty villages due to migration to the pastures          | Impacts     | 1 | 2072 | KP   |
| 1262 | Empty villages due to migration to the pastures          | Impacts     | 1 | 2065 | AP   |
| 1263 | Empty villages due to migration to the pastures          | Impacts     | 1 | 2070 | GKP  |
| 1264 | Empty villages due to migration to the pastures          | Impacts     | 1 | 2070 | Raj  |
| 1265 | Empty villages due to migration to the pastures          | Impacts     | 1 | 2068 | KP   |
| 1266 | Empty villages due to migration to the pastures          | Impacts     | 1 | 2071 | KP   |
| 1267 | Empty villages due to migration to the pastures          | Impacts     | 1 | 2071 | KP   |
| 1268 | Empty villages due to migration to the pastures          | Impacts     | 1 | 2073 | Raj  |
| 1269 | Empty villages due to migration to the pastures          | Impacts     | 1 | 2070 | KP   |
| 1270 | Empty villages due to migration to the pastures          | Impacts     | 1 | 2070 | KP   |
| 1271 | Empty villages due to migration to the pastures          | Impacts     | 1 | 2071 | KP   |
| 1272 | Empty villages due to migration to the pastures          | Impacts     | 1 | 2071 | KP   |

|      |                                                 |         |   |      |      |
|------|-------------------------------------------------|---------|---|------|------|
| 1273 | Empty villages due to migration to the pastures | Impacts | 1 | 2071 | KP   |
| 1274 | Empty villages due to migration to the pastures | Impacts | 1 | 2071 | KP   |
| 1275 | Empty villages due to migration to the pastures | Impacts | 1 | 2070 | KP   |
| 1276 | Empty villages due to migration to the pastures | Impacts | 1 | 2072 | KP   |
| 1277 | Empty villages due to migration to the pastures | Impacts | 1 | 2071 | AP   |
| 1278 | Empty villages due to migration to the pastures | Impacts | 1 | 2073 | AP   |
| 1279 | Empty villages due to migration to the pastures | Impacts | 1 | 2074 | KP   |
| 1280 | Empty villages due to migration to the pastures | Impacts | 1 | 2074 | KP   |
| 1281 | Empty villages due to migration to the pastures | Impacts | 1 | 2073 | KP   |
| 1282 | Empty villages due to migration to the pastures | Impacts | 1 | 2071 | GKP  |
| 1283 | Empty villages due to migration to the pastures | Impacts | 1 | 2072 | GKP  |
| 1284 | Empty villages due to migration to the pastures | Impacts | 1 | 2073 | KP   |
| 1285 | Empty villages due to migration to the pastures | Impacts | 1 | 2067 | Naya |
| 1286 | Empty villages due to migration to the pastures | Impacts | 1 | 2067 | Nag  |
| 1287 | Empty villages due to migration to the pastures | Impacts | 1 | 2067 | Nag  |
| 1288 | Empty villages due to migration to the pastures | Impacts | 1 | 2071 | Nag  |
| 1289 | Empty villages due to migration to the pastures | Impacts | 1 | 2071 | Nag  |
| 1290 | Empty villages due to migration to the pastures | Impacts | 1 | 2071 | Nag  |
| 1291 | Empty villages due to migration to the pastures | Impacts | 1 | 2071 | Nag  |
| 1292 | Empty villages due to migration to the pastures | Impacts | 1 | 2071 | Nag  |
| 1293 | Empty villages due to migration to the pastures | Impacts | 1 | 2071 | Nag  |
| 1294 | Empty villages due to migration to the pastures | Impacts | 1 | 2071 | Nag  |
| 1295 | Empty villages due to migration to the pastures | Impacts | 1 | 2071 | Nag  |
| 1296 | Empty villages due to migration to the pastures | Impacts | 1 | 2071 | Nag  |
| 1297 | Empty villages due to migration to the pastures | Impacts | 1 | 2071 | Nag  |
| 1298 | Empty villages due to migration to the pastures | Impacts | 1 | 2073 | Naya |
| 1299 | Empty villages due to migration to the pastures | Impacts | 1 | 2069 | KP   |
| 1300 | Empty villages due to migration to the pastures | Impacts | 1 | 2071 | Nag  |
| 1301 | Empty villages due to migration to the pastures | Impacts | 1 | 2071 | Nag  |
| 1302 | Empty villages due to migration to the pastures | Impacts | 1 | 2073 | Nag  |
| 1303 | Empty villages due to migration to the pastures | Impacts | 1 | 2071 | KP   |

|      |                                                 |            |   |      |      |
|------|-------------------------------------------------|------------|---|------|------|
| 1304 | Empty villages due to migration to the pastures | Impacts    | 1 | 2071 | KP   |
| 1305 | Empty villages due to migration to the pastures | Impacts    | 1 | 2071 | KP   |
| 1306 | Empty villages due to migration to the pastures | Impacts    | 1 | 2072 | KP   |
| 1307 | Empty villages due to migration to the pastures | Impacts    | 1 | 2071 | KP   |
| 1308 | Empty villages due to migration to the pastures | Impacts    | 1 | 2072 | KP   |
| 1309 | Empty villages due to migration to the pastures | Impacts    | 1 | 2077 | GKP  |
| 1310 | Empty villages due to migration to the pastures | Impacts    | 1 | 2078 | GKP  |
| 1311 | Empty villages due to migration to the pastures | Impacts    | 1 | 2078 | GKP  |
| 1312 | Empty villages due to migration to the pastures | Impacts    | 1 | 2078 | GKP  |
| 1313 | Empty villages due to migration to the pastures | Impacts    | 1 | 2078 | GKP  |
| 1314 | Empty villages due to migration to the pastures | Impacts    | 1 | 2076 | Naya |
| 1315 | Empty villages due to migration to the pastures | Impacts    | 1 | 2076 | AP   |
| 1316 | Empty villages due to migration to the pastures | Impacts    | 1 | 2076 | AP   |
| 1317 | Empty villages due to migration to the pastures | Impacts    | 1 | 2076 | Ka   |
| 1318 | Empty villages due to migration to the pastures | Impacts    | 1 | 2074 | Nag  |
| 1319 | Empty villages due to migration to the pastures | Impacts    | 1 | 2076 | Ka   |
| 1320 | Empty villages due to migration to the pastures | Impacts    | 1 | 2076 | Ka   |
| 1321 | Entry fee to harvesters and traders             | Governance | 1 | 2072 | KP   |
| 1322 | Entry fee to harvesters and traders             | Governance | 1 | 2072 | KP   |
| 1323 | Entry fee to harvesters and traders             | Governance | 1 | 2072 | KP   |
| 1324 | Entry fee to harvesters and traders             | Governance | 1 | 2071 | KP   |
| 1325 | Entry fee to harvesters and traders             | Governance | 1 | 2066 | AP   |
| 1326 | Entry fee to harvesters and traders             | Governance | 1 | 2066 | AP   |
| 1327 | Entry fee to harvesters and traders             | Governance | 1 | 2074 | Naya |
| 1328 | Entry fee to harvesters and traders             | Governance | 1 | 2071 | Nag  |
| 1329 | Entry fee to harvesters and traders             | Governance | 1 | 2072 | Raj  |
| 1330 | Entry fee to harvesters and traders             | Governance | 1 | 2074 | GKP  |
| 1331 | Entry fee to harvesters and traders             | Governance | 1 | 2073 | Ka   |
| 1332 | Entry fee to harvesters and traders             | Governance | 1 | 2074 | Naya |
| 1333 | Entry fee to harvesters and traders             | Governance | 1 | 2071 | Nag  |
| 1334 | Entry fee to harvesters and traders             | Governance | 1 | 2073 | Naya |

|      |                                     |            |   |      |      |
|------|-------------------------------------|------------|---|------|------|
| 1335 | Entry fee to harvesters and traders | Governance | 1 | 2074 | KP   |
| 1336 | Entry fee to harvesters and traders | Governance | 1 | 2074 | KP   |
| 1337 | Entry fee to harvesters and traders | Governance | 1 | 2071 | AP   |
| 1338 | Entry fee to harvesters and traders | Governance | 1 | 2071 | AP   |
| 1339 | Entry fee to harvesters and traders | Governance | 1 | 2072 | KP   |
| 1340 | Entry fee to harvesters and traders | Governance | 1 | 2072 | Raj  |
| 1341 | Entry fee to harvesters and traders | Governance | 1 | 2069 | Naya |
| 1342 | Entry fee to harvesters and traders | Governance | 1 | 2072 | Nag  |
| 1343 | Entry fee to harvesters and traders | Governance | 1 | 2073 | GKP  |
| 1344 | Entry fee to harvesters and traders | Governance | 1 | 2071 | Ka   |
| 1345 | Entry fee to harvesters and traders | Governance | 1 | 2073 | Nag  |
| 1346 | Entry fee to harvesters and traders | Governance | 1 | 2072 | Nag  |
| 1347 | Entry fee to harvesters and traders | Governance | 1 | 2073 | Nag  |
| 1348 | Entry fee to harvesters and traders | Governance | 1 | 2073 | Nag  |
| 1349 | Entry fee to harvesters and traders | Governance | 1 | 2071 | AP   |
| 1350 | Entry fee to harvesters and traders | Governance | 1 | 2066 | GKP  |
| 1351 | Entry fee to harvesters and traders | Governance | 1 | 2070 | KP   |
| 1352 | Entry fee to harvesters and traders | Governance | 1 | 2071 | Ka   |
| 1353 | Entry fee to harvesters and traders | Governance | 1 | 2073 | Naya |
| 1354 | Entry fee to harvesters and traders | Governance | 1 | 2070 | GKP  |
| 1355 | Entry fee to harvesters and traders | Governance | 1 | 2071 | AP   |
| 1356 | Entry fee to harvesters and traders | Governance | 1 | 2070 | GKP  |
| 1357 | Entry fee to harvesters and traders | Governance | 1 | 2072 | AP   |
| 1358 | Entry fee to harvesters and traders | Governance | 1 | 2073 | Nag  |
| 1359 | Entry fee to harvesters and traders | Governance | 1 | 2065 | Raj  |
| 1360 | Entry fee to harvesters and traders | Governance | 1 | 2073 | Ka   |
| 1361 | Entry fee to harvesters and traders | Governance | 1 | 2068 | KP   |
| 1362 | Entry fee to harvesters and traders | Governance | 1 | 2071 | KP   |
| 1363 | Entry fee to harvesters and traders | Governance | 1 | 2073 | Raj  |
| 1364 | Entry fee to harvesters and traders | Governance | 1 | 2073 | GKP  |
| 1365 | Entry fee to harvesters and traders | Governance | 1 | 2073 | GKP  |

|      |                                                                               |             |   |      |      |
|------|-------------------------------------------------------------------------------|-------------|---|------|------|
| 1366 | Entry fee to harvesters and traders                                           | Governance  | 1 | 2068 | Raj  |
| 1367 | Entry fee to harvesters and traders                                           | Governance  | 1 | 2065 | Raj  |
| 1368 | Entry fee to harvesters and traders                                           | Governance  | 1 | 2067 | Raj  |
| 1369 | Entry fee to harvesters and traders                                           | Governance  | 1 | 2067 | Raj  |
| 1370 | Entry fee to harvesters and traders                                           | Governance  | 1 | 2068 | Raj  |
| 1371 | Entry fee to harvesters and traders                                           | Governance  | 1 | 2068 | Raj  |
| 1372 | Entry permits checks by season management committee                           | Governance  | 1 | 2071 | Nag  |
| 1373 | Environmental degradation due to overcrowded pastures                         | Impacts     | 1 | 2078 | GKP  |
| 1374 | Environmental degradation due to overcrowded pastures                         | Impacts     | 1 | 2078 | GKP  |
| 1375 | Environmental degradation due to overcrowded pastures                         | Impacts     | 1 | 2078 | GKP  |
| 1376 | Environmental degradation due to overcrowded pastures                         | Impacts     | 1 | 2078 | GKP  |
| 1377 | Environmental degradation due to overcrowded pastures                         | Impacts     | 1 | 2078 | GKP  |
| 1378 | Environmental degradation due to overcrowded pastures                         | Impacts     | 1 | 2072 | Nag  |
| 1379 | Environmental degradation due to overcrowded pastures                         | Impacts     | 1 | 2078 | KP   |
| 1380 | Environmental degradation due to overcrowded pastures                         | Impacts     | 1 | 2078 | Nag  |
| 1381 | Environmental degradation due to overcrowded pastures                         | Impacts     | 1 | 2077 | Nag  |
| 1382 | Environmental degradation due to overcrowded pastures                         | Impacts     | 1 | 2078 | Nag  |
| 1383 | Environmental degradation due to overcrowded pastures                         | Impacts     | 1 | 2074 | Naya |
| 1384 | Environmental degradation due to overcrowded pastures                         | Impacts     | 1 | 2078 | Ka   |
| 1385 | Equivalent of 1 kilogram to pieces of caterpillar fungus                      | Information | 1 | 2078 | GKP  |
| 1386 | Equivalent of 1 kilogram to pieces of caterpillar fungus                      | Information | 1 | 2073 | Nag  |
| 1387 | Expenses of management committee reported                                     | Governance  | 1 | 2065 | Raj  |
| 1388 | Expenses of management committee reported                                     | Governance  | 1 | 2065 | Raj  |
| 1389 | Expenses of the harvesters to reach pasture reported                          | Harvesting  | 1 | 2071 | Nag  |
| 1390 | Expenses of the harvesters to reach pasture reported                          | Harvesting  | 1 | 2071 | AP   |
| 1391 | Expenses of the harvesters to reach pasture reported                          | Harvesting  | 1 | 2071 | KP   |
| 1392 | Expenses overweigh income due to decreased availability of caterpillar fungus | Harvesting  | 1 | 2070 | KP   |
| 1393 | Expenses overweigh income due to decreased availability of caterpillar fungus | Harvesting  | 1 | 2073 | KP   |



|      |                                                                               |            |   |      |      |
|------|-------------------------------------------------------------------------------|------------|---|------|------|
| 1394 | Expenses overweigh income due to decreased availability of caterpillar fungus | Harvesting | 1 | 2073 | Ka   |
| 1395 | Expenses overweigh income due to decreased availability of caterpillar fungus | Harvesting | 1 | 2069 | Naya |
| 1396 | Expenses overweigh income due to decreased availability of caterpillar fungus | Harvesting | 1 | 2066 | GKP  |
| 1397 | Expenses overweigh income due to decreased availability of caterpillar fungus | Harvesting | 1 | 2073 | Ka   |
| 1398 | Expenses overweigh income due to decreased availability of caterpillar fungus | Harvesting | 1 | 2067 | Nag  |
| 1399 | Expenses overweigh income due to decreased availability of caterpillar fungus | Harvesting | 1 | 2072 | AP   |
| 1400 | Expenses overweigh income due to decreased availability of caterpillar fungus | Harvesting | 1 | 2074 | AP   |
| 1401 | Expenses overweigh income due to decreased availability of caterpillar fungus | Harvesting | 1 | 2066 | GKP  |
| 1402 | Expenses overweigh income due to decreased availability of caterpillar fungus | Harvesting | 1 | 2072 | Nag  |
| 1403 | Experts to study on caterpillar fungus                                        | Gap        | 1 | 2073 | Nag  |
| 1404 | Fake stamps of forest authorities found                                       | Impacts    | 1 | 2072 | KP   |
| 1405 | Festival related to caterpillar fungus                                        | Impacts    | 1 | 2066 | Naya |
| 1406 | Festival related to caterpillar fungus                                        | Impacts    | 1 | 2068 | GKP  |
| 1407 | Festival related to caterpillar fungus                                        | Impacts    | 1 | 2071 | GKP  |
| 1408 | Festival related to caterpillar fungus                                        | Impacts    | 1 | 2071 | Nag  |
| 1409 | Festival related to caterpillar fungus                                        | Impacts    | 1 | 2072 | KP   |
| 1410 | Fluctuation of harvesters                                                     | Harvesting | 1 | 2072 | KP   |
| 1411 | Food and equipment taken by the harvesters                                    | Harvesting | 1 | 2072 | KP   |
| 1412 | Food and equipment taken by the harvesters                                    | Harvesting | 1 | 2065 | AP   |
| 1413 | Food and equipment taken by the harvesters                                    | Harvesting | 1 | 2068 | Raj  |
| 1414 | Food and equipment taken by the harvesters                                    | Harvesting | 1 | 2068 | GKP  |
| 1415 | Food and equipment taken by the harvesters                                    | Harvesting | 1 | 2068 | GKP  |

|      |                                                                  |            |   |      |      |
|------|------------------------------------------------------------------|------------|---|------|------|
| 1416 | Food and equipment taken by the harvesters                       | Harvesting | 1 | 2070 | Nag  |
| 1417 | Food and equipment taken by the harvesters                       | Harvesting | 1 | 2065 | Naya |
| 1418 | Food and equipment taken by the harvesters                       | Harvesting | 1 | 2071 | Ka   |
| 1419 | Food and equipment taken by the harvesters                       | Harvesting | 1 | 2071 | Ka   |
| 1420 | Food and equipment taken by the harvesters                       | Harvesting | 1 | 2078 | GKP  |
| 1421 | Food and equipment taken by the harvesters                       | Harvesting | 1 | 2074 | Nag  |
| 1422 | Food and equipment taken by the harvesters                       | Harvesting | 1 | 2076 | KP   |
| 1423 | Food and water shortages during harvesting season                | Challenges | 1 | 2072 | Ka   |
| 1424 | Food and water shortages during harvesting season                | Challenges | 1 | 2074 | Ka   |
| 1425 | Gambling during the harvesting season                            | Impacts    | 1 | 2074 | Ka   |
| 1426 | Good quality caterpillar fungus traded to Tibet                  | Trade      | 1 | 2065 | Raj  |
| 1427 | Good quality caterpillar fungus traded to Tibet                  | Trade      | 1 | 2068 | Ka   |
| 1428 | Harsh environmental conditions at the pastures                   | Challenges | 1 | 2066 | Raj  |
| 1429 | Harvest during morning time only                                 | Harvesting | 1 | 2068 | Raj  |
| 1430 | Harvester return empty hand (due to disaster)                    | Challenges | 1 | 2068 | Raj  |
| 1431 | Harvesters attracted due to monetary value of caterpillar fungus | Harvesting | 1 | 2071 | Raj  |
| 1432 | Harvesters attracted due to monetary value of caterpillar fungus | Harvesting | 1 | 2072 | Raj  |
| 1433 | Harvesters attracted due to monetary value of caterpillar fungus | Harvesting | 1 | 2066 | Naya |
| 1434 | Harvesters attracted due to monetary value of caterpillar fungus | Harvesting | 1 | 2075 | AP   |
| 1435 | Harvesters attracted due to monetary value of caterpillar fungus | Harvesting | 1 | 2075 | AP   |
| 1436 | Harvesters attracted due to monetary value of caterpillar fungus | Harvesting | 1 | 2075 | AP   |
| 1437 | Harvesters attracted due to monetary value of caterpillar fungus | Harvesting | 1 | 2075 | AP   |
| 1438 | Harvesters attracted due to monetary value of caterpillar fungus | Harvesting | 1 | 2075 | AP   |
| 1439 | Harvesters attracted due to monetary value of caterpillar fungus | Harvesting | 1 | 2075 | AP   |
| 1440 | Harvesters attracted due to monetary value of caterpillar fungus | Harvesting | 1 | 2075 | AP   |
| 1441 | Harvesters attracted due to monetary value of caterpillar fungus | Harvesting | 1 | 2075 | AP   |
| 1442 | Harvesters attracted due to monetary value of caterpillar fungus | Harvesting | 1 | 2075 | AP   |
| 1443 | Harvesters attracted due to monetary value of caterpillar fungus | Harvesting | 1 | 2075 | AP   |
| 1444 | Harvesters attracted due to monetary value of caterpillar fungus | Harvesting | 1 | 2075 | AP   |
| 1445 | Harvesters attracted due to monetary value of caterpillar fungus | Harvesting | 1 | 2075 | AP   |
| 1446 | Harvesters attracted due to monetary value of caterpillar fungus | Harvesting | 1 | 2075 | AP   |

|      |                                                                     |            |   |      |      |
|------|---------------------------------------------------------------------|------------|---|------|------|
| 1447 | Harvesters attracted due to monetary value of caterpillar fungus    | Harvesting | 1 | 2075 | AP   |
| 1448 | Harvesters attracted due to monetary value of caterpillar fungus    | Harvesting | 1 | 2075 | AP   |
| 1449 | Harvesters attracted due to monetary value of caterpillar fungus    | Harvesting | 1 | 2075 | AP   |
| 1450 | Harvesters attracted due to monetary value of caterpillar fungus    | Harvesting | 1 | 2075 | AP   |
| 1451 | Harvesters attracted due to monetary value of caterpillar fungus    | Harvesting | 1 | 2075 | AP   |
| 1452 | Harvesters attracted due to monetary value of caterpillar fungus    | Harvesting | 1 | 2075 | AP   |
| 1453 | Harvesters attracted due to monetary value of caterpillar fungus    | Harvesting | 1 | 2075 | AP   |
| 1454 | Harvesters attracted due to monetary value of caterpillar fungus    | Harvesting | 1 | 2075 | AP   |
| 1455 | Harvesters attracted due to monetary value of caterpillar fungus    | Harvesting | 1 | 2075 | AP   |
| 1456 | Harvesters attracted due to monetary value of caterpillar fungus    | Harvesting | 1 | 2075 | AP   |
| 1457 | Harvesters attracted due to monetary value of caterpillar fungus    | Harvesting | 1 | 2075 | AP   |
| 1458 | Harvesters attracted due to monetary value of caterpillar fungus    | Harvesting | 1 | 2075 | AP   |
| 1459 | Harvesters attracted due to monetary value of caterpillar fungus    | Harvesting | 1 | 2077 | Nag  |
| 1460 | Harvesters attracted due to monetary value of caterpillar fungus    | Harvesting | 1 | 2078 | Nag  |
| 1461 | Harvesters attracted due to monetary value of caterpillar fungus    | Harvesting | 1 | 2078 | KP   |
| 1462 | Harvesters attracted due to monetary value of caterpillar fungus    | Harvesting | 1 | 2074 | Naya |
| 1463 | Harvesters attracted due to monetary value of caterpillar fungus    | Harvesting | 1 | 2076 | Naya |
| 1464 | Harvesters attracted due to monetary value of caterpillar fungus    | Harvesting | 1 | 2076 | Naya |
| 1465 | Harvesters attracted due to monetary value of caterpillar fungus    | Harvesting | 1 | 2078 | Naya |
| 1466 | Harvesters attracted due to monetary value of caterpillar fungus    | Harvesting | 1 | 2078 | Naya |
| 1467 | Harvesters attracted due to monetary value of caterpillar fungus    | Harvesting | 1 | 2075 | RAJ  |
| 1468 | Harvesters attracted due to monetary value of caterpillar fungus    | Harvesting | 1 | 2077 | RAJ  |
| 1469 | Harvesters attracted due to monetary value of caterpillar fungus    | Harvesting | 1 | 2078 | RAJ  |
| 1470 | Harvesters attracted due to monetary value of caterpillar fungus    | Harvesting | 1 | 2074 | RAJ  |
| 1471 | Harvesters attracted due to monetary value of caterpillar fungus    | Harvesting | 1 | 2076 | Ka   |
| 1472 | Harvesters attracted due to monetary value of caterpillar fungus    | Harvesting | 1 | 2076 | Ka   |
| 1473 | Harvesters attracted due to monetary value of caterpillar fungus    | Harvesting | 1 | 2076 | Ka   |
| 1474 | Harvesters attracted due to monetary value of caterpillar fungus    | Harvesting | 1 | 2078 | Ka   |
| 1475 | Harvesters camp in the pastures                                     | Harvesting | 1 | 2067 | Naya |
| 1476 | Harvesters camp inside forest for the caterpillar fungus collection | Harvesting | 1 | 2068 | Naya |
| 1477 | Harvesters demand security in the pastures                          | Challenges | 1 | 2070 | Naya |

|      |                                                 |            |   |      |      |
|------|-------------------------------------------------|------------|---|------|------|
| 1478 | Harvesters demography (gender, age, occupation) | Harvesting | 1 | 2071 | Naya |
| 1479 | Harvesters demography (gender, age, occupation) | Harvesting | 1 | 2072 | Naya |
| 1480 | Harvesters demography (gender, age, occupation) | Harvesting | 1 | 2072 | Naya |
| 1481 | Harvesters demography (gender, age, occupation) | Harvesting | 1 | 2072 | Naya |
| 1482 | Harvesters demography (gender, age, occupation) | Harvesting | 1 | 2073 | Naya |
| 1483 | Harvesters demography (gender, age, occupation) | Harvesting | 1 | 2074 | Naya |
| 1484 | Harvesters demography (gender, age, occupation) | Harvesting | 1 | 2074 | Naya |
| 1485 | Harvesters demography (gender, age, occupation) | Harvesting | 1 | 2068 | Nag  |
| 1486 | Harvesters demography (gender, age, occupation) | Harvesting | 1 | 2069 | Nag  |
| 1487 | Harvesters demography (gender, age, occupation) | Harvesting | 1 | 2069 | Nag  |
| 1488 | Harvesters demography (gender, age, occupation) | Harvesting | 1 | 2070 | Nag  |
| 1489 | Harvesters demography (gender, age, occupation) | Harvesting | 1 | 2070 | Nag  |
| 1490 | Harvesters demography (gender, age, occupation) | Harvesting | 1 | 2070 | Nag  |
| 1491 | Harvesters demography (gender, age, occupation) | Harvesting | 1 | 2073 | Nag  |
| 1492 | Harvesters demography (gender, age, occupation) | Harvesting | 1 | 2065 | KP   |
| 1493 | Harvesters demography (gender, age, occupation) | Harvesting | 1 | 2068 | KP   |
| 1494 | Harvesters demography (gender, age, occupation) | Harvesting | 1 | 2068 | KP   |
| 1495 | Harvesters demography (gender, age, occupation) | Harvesting | 1 | 2068 | KP   |
| 1496 | Harvesters demography (gender, age, occupation) | Harvesting | 1 | 2069 | KP   |
| 1497 | Harvesters demography (gender, age, occupation) | Harvesting | 1 | 2071 | KP   |
| 1498 | Harvesters demography (gender, age, occupation) | Harvesting | 1 | 2071 | KP   |
| 1499 | Harvesters demography (gender, age, occupation) | Harvesting | 1 | 2071 | KP   |
| 1500 | Harvesters demography (gender, age, occupation) | Harvesting | 1 | 2071 | KP   |
| 1501 | Harvesters demography (gender, age, occupation) | Harvesting | 1 | 2071 | KP   |
| 1502 | Harvesters demography (gender, age, occupation) | Harvesting | 1 | 2072 | KP   |
| 1503 | Harvesters demography (gender, age, occupation) | Harvesting | 1 | 2072 | KP   |
| 1504 | Harvesters demography (gender, age, occupation) | Harvesting | 1 | 2072 | KP   |
| 1505 | Harvesters demography (gender, age, occupation) | Harvesting | 1 | 2072 | KP   |
| 1506 | Harvesters demography (gender, age, occupation) | Harvesting | 1 | 2072 | KP   |
| 1507 | Harvesters demography (gender, age, occupation) | Harvesting | 1 | 2073 | KP   |
| 1508 | Harvesters demography (gender, age, occupation) | Harvesting | 1 | 2073 | KP   |

|      |                                                 |            |   |      |     |
|------|-------------------------------------------------|------------|---|------|-----|
| 1509 | Harvesters demography (gender, age, occupation) | Harvesting | 1 | 2065 | KP  |
| 1510 | Harvesters demography (gender, age, occupation) | Harvesting | 1 | 2065 | KP  |
| 1511 | Harvesters demography (gender, age, occupation) | Harvesting | 1 | 2072 | KP  |
| 1512 | Harvesters demography (gender, age, occupation) | Harvesting | 1 | 2069 | AP  |
| 1513 | Harvesters demography (gender, age, occupation) | Harvesting | 1 | 2068 | KP  |
| 1514 | Harvesters demography (gender, age, occupation) | Harvesting | 1 | 2071 | Nag |
| 1515 | Harvesters demography (gender, age, occupation) | Harvesting | 1 | 2071 | Nag |
| 1516 | Harvesters demography (gender, age, occupation) | Harvesting | 1 | 2068 | GKP |
| 1517 | Harvesters demography (gender, age, occupation) | Harvesting | 1 | 2074 | AP  |
| 1518 | Harvesters demography (gender, age, occupation) | Harvesting | 1 | 2067 | GKP |
| 1519 | Harvesters demography (gender, age, occupation) | Harvesting | 1 | 2068 | GKP |
| 1520 | Harvesters demography (gender, age, occupation) | Harvesting | 1 | 2072 | AP  |
| 1521 | Harvesters demography (gender, age, occupation) | Harvesting | 1 | 2072 | AP  |
| 1522 | Harvesters demography (gender, age, occupation) | Harvesting | 1 | 2071 | Ka  |
| 1523 | Harvesters demography (gender, age, occupation) | Harvesting | 1 | 2071 | Ka  |
| 1524 | Harvesters demography (gender, age, occupation) | Harvesting | 1 | 2072 | Ka  |
| 1525 | Harvesters demography (gender, age, occupation) | Harvesting | 1 | 2072 | Ka  |
| 1526 | Harvesters demography (gender, age, occupation) | Harvesting | 1 | 2072 | Ka  |
| 1527 | Harvesters demography (gender, age, occupation) | Harvesting | 1 | 2072 | Ka  |
| 1528 | Harvesters demography (gender, age, occupation) | Harvesting | 1 | 2072 | Ka  |
| 1529 | Harvesters demography (gender, age, occupation) | Harvesting | 1 | 2073 | Ka  |
| 1530 | Harvesters demography (gender, age, occupation) | Harvesting | 1 | 2073 | Ka  |
| 1531 | Harvesters demography (gender, age, occupation) | Harvesting | 1 | 2074 | Ka  |
| 1532 | Harvesters demography (gender, age, occupation) | Harvesting | 1 | 2074 | Ka  |
| 1533 | Harvesters demography (gender, age, occupation) | Harvesting | 1 | 2074 | Ka  |
| 1534 | Harvesters demography (gender, age, occupation) | Harvesting | 1 | 2074 | Ka  |
| 1535 | Harvesters demography (gender, age, occupation) | Harvesting | 1 | 2067 | KP  |
| 1536 | Harvesters demography (gender, age, occupation) | Harvesting | 1 | 2068 | KP  |
| 1537 | Harvesters demography (gender, age, occupation) | Harvesting | 1 | 2068 | KP  |
| 1538 | Harvesters demography (gender, age, occupation) | Harvesting | 1 | 2068 | KP  |
| 1539 | Harvesters demography (gender, age, occupation) | Harvesting | 1 | 2069 | KP  |

|      |                                                    |            |   |      |    |
|------|----------------------------------------------------|------------|---|------|----|
| 1540 | Harvesters demography (gender, age, occupation)    | Harvesting | 1 | 2069 | KP |
| 1541 | Harvesters demography (gender, age, occupation)    | Harvesting | 1 | 2069 | KP |
| 1542 | Harvesters demography (gender, age, occupation)    | Harvesting | 1 | 2069 | KP |
| 1543 | Harvesters demography (gender, age, occupation)    | Harvesting | 1 | 2071 | KP |
| 1544 | Harvesters demography (gender, age, occupation)    | Harvesting | 1 | 2075 | AP |
| 1545 | Harvesters demography (gender, age, occupation)    | Harvesting | 1 | 2075 | AP |
| 1636 | Harvesters dependency on caterpillar fungus income | Harvesting | 1 | 2075 | AP |
| 1637 | Harvesters dependency on caterpillar fungus income | Harvesting | 1 | 2075 | AP |
| 1638 | Harvesters dependency on caterpillar fungus income | Harvesting | 1 | 2075 | AP |
| 1639 | Harvesters dependency on caterpillar fungus income | Harvesting | 1 | 2075 | AP |
| 1640 | Harvesters dependency on caterpillar fungus income | Harvesting | 1 | 2075 | AP |
| 1641 | Harvesters dependency on caterpillar fungus income | Harvesting | 1 | 2076 | AP |
| 1642 | Harvesters dependency on caterpillar fungus income | Harvesting | 1 | 2076 | AP |
| 1643 | Harvesters dependency on caterpillar fungus income | Harvesting | 1 | 2076 | AP |
| 1644 | Harvesters dependency on caterpillar fungus income | Harvesting | 1 | 2076 | AP |
| 1645 | Harvesters dependency on caterpillar fungus income | Harvesting | 1 | 2075 | AP |
| 1546 | Harvesters dependency on caterpillar fungus income | Impacts    | 1 | 2071 | KP |
| 1547 | Harvesters dependency on caterpillar fungus income | Impacts    | 1 | 2071 | KP |
| 1548 | Harvesters dependency on caterpillar fungus income | Impacts    | 1 | 2071 | KP |
| 1549 | Harvesters dependency on caterpillar fungus income | Impacts    | 1 | 2071 | KP |
| 1550 | Harvesters dependency on caterpillar fungus income | Impacts    | 1 | 2072 | KP |
| 1551 | Harvesters dependency on caterpillar fungus income | Impacts    | 1 | 2072 | KP |
| 1552 | Harvesters dependency on caterpillar fungus income | Impacts    | 1 | 2072 | KP |
| 1553 | Harvesters dependency on caterpillar fungus income | Impacts    | 1 | 2073 | KP |
| 1554 | Harvesters dependency on caterpillar fungus income | Impacts    | 1 | 2073 | KP |
| 1555 | Harvesters dependency on caterpillar fungus income | Impacts    | 1 | 2073 | KP |
| 1556 | Harvesters dependency on caterpillar fungus income | Impacts    | 1 | 2073 | KP |
| 1557 | Harvesters dependency on caterpillar fungus income | Impacts    | 1 | 2073 | KP |
| 1558 | Harvesters dependency on caterpillar fungus income | Impacts    | 1 | 2074 | KP |
| 1559 | Harvesters dependency on caterpillar fungus income | Impacts    | 1 | 2074 | KP |
| 1560 | Harvesters dependency on caterpillar fungus income | Impacts    | 1 | 2074 | KP |

|      |                                                    |         |   |      |      |
|------|----------------------------------------------------|---------|---|------|------|
| 1561 | Harvesters dependency on caterpillar fungus income | Impacts | 1 | 2074 | KP   |
| 1562 | Harvesters dependency on caterpillar fungus income | Impacts | 1 | 2074 | KP   |
| 1563 | Harvesters dependency on caterpillar fungus income | Impacts | 1 | 2065 | Raj  |
| 1564 | Harvesters dependency on caterpillar fungus income | Impacts | 1 | 2066 | Raj  |
| 1565 | Harvesters dependency on caterpillar fungus income | Impacts | 1 | 2066 | Raj  |
| 1566 | Harvesters dependency on caterpillar fungus income | Impacts | 1 | 2066 | Raj  |
| 1567 | Harvesters dependency on caterpillar fungus income | Impacts | 1 | 2067 | Raj  |
| 1568 | Harvesters dependency on caterpillar fungus income | Impacts | 1 | 2068 | Raj  |
| 1569 | Harvesters dependency on caterpillar fungus income | Impacts | 1 | 2068 | Raj  |
| 1570 | Harvesters dependency on caterpillar fungus income | Impacts | 1 | 2068 | Raj  |
| 1571 | Harvesters dependency on caterpillar fungus income | Impacts | 1 | 2068 | Raj  |
| 1572 | Harvesters dependency on caterpillar fungus income | Impacts | 1 | 2068 | Raj  |
| 1573 | Harvesters dependency on caterpillar fungus income | Impacts | 1 | 2071 | Raj  |
| 1574 | Harvesters dependency on caterpillar fungus income | Impacts | 1 | 2071 | Raj  |
| 1575 | Harvesters dependency on caterpillar fungus income | Impacts | 1 | 2072 | Raj  |
| 1576 | Harvesters dependency on caterpillar fungus income | Impacts | 1 | 2065 | Naya |
| 1577 | Harvesters dependency on caterpillar fungus income | Impacts | 1 | 2065 | Naya |
| 1578 | Harvesters dependency on caterpillar fungus income | Impacts | 1 | 2065 | Naya |
| 1579 | Harvesters dependency on caterpillar fungus income | Impacts | 1 | 2066 | Naya |
| 1580 | Harvesters dependency on caterpillar fungus income | Impacts | 1 | 2066 | Naya |
| 1581 | Harvesters dependency on caterpillar fungus income | Impacts | 1 | 2067 | Naya |
| 1582 | Harvesters dependency on caterpillar fungus income | Impacts | 1 | 2068 | Naya |
| 1583 | Harvesters dependency on caterpillar fungus income | Impacts | 1 | 2069 | Naya |
| 1584 | Harvesters dependency on caterpillar fungus income | Impacts | 1 | 2070 | Naya |
| 1585 | Harvesters dependency on caterpillar fungus income | Impacts | 1 | 2072 | Naya |
| 1586 | Harvesters dependency on caterpillar fungus income | Impacts | 1 | 2073 | Naya |
| 1587 | Harvesters dependency on caterpillar fungus income | Impacts | 1 | 2074 | Naya |
| 1588 | Harvesters dependency on caterpillar fungus income | Impacts | 1 | 2074 | Naya |
| 1589 | Harvesters dependency on caterpillar fungus income | Impacts | 1 | 2066 | Nag  |
| 1590 | Harvesters dependency on caterpillar fungus income | Impacts | 1 | 2067 | Nag  |
| 1591 | Harvesters dependency on caterpillar fungus income | Impacts | 1 | 2068 | Nag  |

|      |                                                    |         |   |      |     |
|------|----------------------------------------------------|---------|---|------|-----|
| 1592 | Harvesters dependency on caterpillar fungus income | Impacts | 1 | 2069 | Nag |
| 1593 | Harvesters dependency on caterpillar fungus income | Impacts | 1 | 2070 | Nag |
| 1594 | Harvesters dependency on caterpillar fungus income | Impacts | 1 | 2070 | Nag |
| 1595 | Harvesters dependency on caterpillar fungus income | Impacts | 1 | 2070 | Nag |
| 1596 | Harvesters dependency on caterpillar fungus income | Impacts | 1 | 2071 | Nag |
| 1597 | Harvesters dependency on caterpillar fungus income | Impacts | 1 | 2071 | Nag |
| 1598 | Harvesters dependency on caterpillar fungus income | Impacts | 1 | 2073 | Nag |
| 1599 | Harvesters dependency on caterpillar fungus income | Impacts | 1 | 2074 | Nag |
| 1600 | Harvesters dependency on caterpillar fungus income | Impacts | 1 | 2074 | Nag |
| 1601 | Harvesters dependency on caterpillar fungus income | Impacts | 1 | 2071 | AP  |
| 1602 | Harvesters dependency on caterpillar fungus income | Impacts | 1 | 2065 | KP  |
| 1603 | Harvesters dependency on caterpillar fungus income | Impacts | 1 | 2065 | GKP |
| 1604 | Harvesters dependency on caterpillar fungus income | Impacts | 1 | 2066 | GKP |
| 1605 | Harvesters dependency on caterpillar fungus income | Impacts | 1 | 2066 | GKP |
| 1606 | Harvesters dependency on caterpillar fungus income | Impacts | 1 | 2066 | GKP |
| 1607 | Harvesters dependency on caterpillar fungus income | Impacts | 1 | 2068 | GKP |
| 1608 | Harvesters dependency on caterpillar fungus income | Impacts | 1 | 2068 | GKP |
| 1609 | Harvesters dependency on caterpillar fungus income | Impacts | 1 | 2068 | GKP |
| 1610 | Harvesters dependency on caterpillar fungus income | Impacts | 1 | 2069 | GKP |
| 1611 | Harvesters dependency on caterpillar fungus income | Impacts | 1 | 2073 | GKP |
| 1612 | Harvesters dependency on caterpillar fungus income | Impacts | 1 | 2072 | GKP |
| 1613 | Harvesters dependency on caterpillar fungus income | Impacts | 1 | 2070 | KP  |
| 1614 | Harvesters dependency on caterpillar fungus income | Impacts | 1 | 2070 | KP  |
| 1615 | Harvesters dependency on caterpillar fungus income | Impacts | 1 | 2072 | KP  |
| 1616 | Harvesters dependency on caterpillar fungus income | Impacts | 1 | 2071 | KP  |
| 1617 | Harvesters dependency on caterpillar fungus income | Impacts | 1 | 2071 | KP  |
| 1618 | Harvesters dependency on caterpillar fungus income | Impacts | 1 | 2073 | KP  |
| 1619 | Harvesters dependency on caterpillar fungus income | Impacts | 1 | 2069 | Nag |
| 1620 | Harvesters dependency on caterpillar fungus income | Impacts | 1 | 2065 | AP  |
| 1621 | Harvesters dependency on caterpillar fungus income | Impacts | 1 | 2066 | Nag |
| 1622 | Harvesters dependency on caterpillar fungus income | Impacts | 1 | 2065 | GKP |



|      |                                                              |             |   |      |      |
|------|--------------------------------------------------------------|-------------|---|------|------|
| 1623 | Harvesters dependency on caterpillar fungus income           | Impacts     | 1 | 2071 | Raj  |
| 1624 | Harvesters dependency on caterpillar fungus income           | Impacts     | 1 | 2072 | GKP  |
| 1625 | Harvesters dependency on caterpillar fungus income           | Impacts     | 1 | 2069 | KP   |
| 1626 | Harvesters dependency on caterpillar fungus income           | Impacts     | 1 | 2073 | Nag  |
| 1627 | Harvesters dependency on caterpillar fungus income           | Impacts     | 1 | 2073 | Nag  |
| 1628 | Harvesters dependency on caterpillar fungus income           | Impacts     | 1 | 2068 | GKP  |
| 1629 | Harvesters dependency on caterpillar fungus income           | Impacts     | 1 | 2065 | Raj  |
| 1630 | Harvesters dependency on caterpillar fungus income           | Impacts     | 1 | 2068 | Raj  |
| 1631 | Harvesters dependency on caterpillar fungus income           | Impacts     | 1 | 2068 | Raj  |
| 1632 | Harvesters dependency on caterpillar fungus income           | Impacts     | 1 | 2070 | Raj  |
| 1633 | Harvesters dependency on caterpillar fungus income           | Impacts     | 1 | 2071 | Nag  |
| 1634 | Harvesters dependency on caterpillar fungus income           | Impacts     | 1 | 2067 | GKP  |
| 1635 | Harvesters dependency on caterpillar fungus income           | Impacts     | 1 | 2072 | KP   |
| 1646 | Harvesters dependency on caterpillar fungus income           | Harvesting  | 1 | 2077 | RAJ  |
| 1647 | Harvesters dependency on caterpillar fungus income           | Harvesting  | 1 | 2078 | RAJ  |
| 1648 | Harvesters dependency on caterpillar fungus income           | Harvesting  | 1 | 2078 | RAJ  |
| 1649 | Harvesters discard agriculture to collect caterpillar fungus | Impacts     | 1 | 2070 | KP   |
| 1650 | Harvesters discard agriculture to collect caterpillar fungus | Impacts     | 1 | 2073 | Nag  |
| 1651 | Harvesters discard agriculture to collect caterpillar fungus | Impacts     | 1 | 2071 | Ka   |
| 1652 | Harvesters discard agriculture to collect caterpillar fungus | Impacts     | 1 | 2071 | Ka   |
| 1653 | Harvesters discard agriculture to collect caterpillar fungus | Impacts     | 1 | 2069 | Raj  |
| 1654 | Harvesters discard agriculture to collect caterpillar fungus | Impacts     | 1 | 2072 | Raj  |
| 1655 | Harvesters discard agriculture to collect caterpillar fungus | Impacts     | 1 | 2071 | Nag  |
| 1656 | Harvesters discard agriculture to collect caterpillar fungus | Impacts     | 1 | 2072 | Nag  |
| 1657 | Harvesters discard agriculture to collect caterpillar fungus | Impacts     | 1 | 2072 | Nag  |
| 1658 | Harvesters discard agriculture to collect caterpillar fungus | Impacts     | 1 | 2073 | Nag  |
| 1659 | Harvesters discard agriculture to collect caterpillar fungus | Impacts     | 1 | 2066 | Raj  |
| 1660 | Harvesters discard agriculture to collect caterpillar fungus | Impacts     | 1 | 2074 | KP   |
| 1661 | Harvesters discard agriculture to collect caterpillar fungus | Impacts     | 1 | 2071 | KP   |
| 1662 | Harvesters do not abide by rules                             | Gap         | 1 | 2070 | Naya |
| 1663 | Harvesters exploring new pastures                            | Information | 1 | 2067 | Nag  |

|      |                                                                              |            |   |      |      |
|------|------------------------------------------------------------------------------|------------|---|------|------|
| 1672 | Harvesters leaving work to harvest caterpillar fungus                        | Impacts    | 1 | 2068 | Naya |
| 1673 | Harvesters less aware about income generation from biodiversity conservation | Harvesting | 1 | 2071 | Nag  |
| 1674 | Harvesters less aware about income generation from biodiversity conservation | Harvesting | 1 | 2078 | Naya |
| 1675 | Harvesters limitations in the pastures (quota)                               | Governance | 1 | 2071 | Nag  |
| 1676 | Harvesters limitations in the pastures (quota)                               | Governance | 1 | 2072 | KP   |
| 1677 | Harvesters limitations in the pastures (quota)                               | Governance | 1 | 2073 | Raj  |
| 1678 | Harvesters limitations in the pastures (quota)                               | Governance | 1 | 2066 | Naya |
| 1679 | Harvesters limitations in the pastures (quota)                               | Governance | 1 | 2071 | Naya |
| 1680 | Harvesters limitations in the pastures (quota)                               | Governance | 1 | 2071 | Nag  |
| 1681 | Harvesters limitations in the pastures (quota)                               | Governance | 1 | 2067 | Naya |
| 1682 | Harvesters limitations in the pastures (quota)                               | Governance | 1 | 2069 | KP   |
| 2995 | Harvesters limitations in the pastures (quota)                               | Governance | 1 | 2071 | AP   |
| 2996 | Harvesters limitations in the pastures (quota)                               | Governance | 1 | 2065 | GKP  |
| 2997 | Harvesters limitations in the pastures (quota)                               | Governance | 1 | 2074 | GKP  |
| 1683 | Harvesters prefer dry foods                                                  | Harvesting | 1 | 2069 | KP   |
| 1684 | Harvesters procure loans for the harvesting journey                          | Trade      | 1 | 2073 | KP   |
| 1685 | Harvesters rescued                                                           | Challenges | 1 | 2071 | KP   |
| 1686 | Harvesters rescued                                                           | Challenges | 1 | 2073 | AP   |
| 1687 | Harvesters return due to extreme cold                                        | Challenges | 1 | 2074 | AP   |
| 1688 | Harvesters return due to extreme cold                                        | Challenges | 1 | 2065 | Raj  |
| 1689 | Harvesters return due to extreme cold                                        | Challenges | 1 | 2069 | Raj  |
| 1690 | Harvesters return due to extreme cold                                        | Challenges | 1 | 2072 | Nag  |
| 1691 | Harvesters return due to extreme cold                                        | Challenges | 1 | 2073 | Nag  |
| 1692 | Harvesters return due to extreme cold                                        | Challenges | 1 | 2073 | KP   |
| 1693 | Harvesters return due to extreme cold                                        | Challenges | 1 | 2071 | KP   |
| 1694 | Harvesters return due to extreme cold                                        | Challenges | 1 | 2068 | GKP  |
| 1695 | Harvesters return empty hand                                                 | Impacts    | 1 | 2071 | KP   |
| 1696 | Harvesters return empty hand                                                 | Impacts    | 1 | 2074 | KP   |
| 1697 | Harvesters return empty hand                                                 | Impacts    | 1 | 2073 | Ka   |

|      |                                                                |            |   |      |      |
|------|----------------------------------------------------------------|------------|---|------|------|
| 1698 | Harvesters return empty hand                                   | Impacts    | 1 | 2074 | Ka   |
| 1699 | Harvesters return empty hand                                   | Impacts    | 1 | 2068 | KP   |
| 1700 | Harvesters return empty hand                                   | Impacts    | 1 | 2069 | KP   |
| 1701 | Harvesters return empty hand                                   | Impacts    | 1 | 2069 | KP   |
| 1702 | Harvesters return empty hand                                   | Impacts    | 1 | 2071 | KP   |
| 1703 | Harvesters return empty hand                                   | Impacts    | 1 | 2068 | Nag  |
| 1704 | Harvesters return empty hand                                   | Impacts    | 1 | 2074 | Naya |
| 1705 | Harvesters return empty hand                                   | Impacts    | 1 | 2068 | KP   |
| 1706 | Harvesters return empty hand                                   | Impacts    | 1 | 2069 | KP   |
| 1707 | Harvesters return empty hand                                   | Impacts    | 1 | 2070 | KP   |
| 1708 | Harvesters return empty hand                                   | Impacts    | 1 | 2070 | KP   |
| 1709 | Harvesters return empty hand                                   | Impacts    | 1 | 2071 | KP   |
| 1710 | Harvesters return empty hand                                   | Impacts    | 1 | 2071 | KP   |
| 1711 | Harvesters return empty hand                                   | Impacts    | 1 | 2072 | KP   |
| 1712 | Harvesters return empty hand                                   | Impacts    | 1 | 2072 | KP   |
| 1713 | Harvesters return late (by July) from the pasture              | Harvesting | 1 | 2072 | KP   |
| 1714 | Harvesters returning from India to collect caterpillar fungus  | Impacts    | 1 | 2073 | KP   |
| 1715 | Harvesters rush to collect caterpillar fungus                  | Harvesting | 1 | 2066 | KP   |
| 1716 | Harvesters rush to collect caterpillar fungus                  | Harvesting | 1 | 2071 | Nag  |
| 1717 | Harvesters spending more time in pastures                      | Harvesting | 1 | 2071 | Nag  |
| 1718 | Harvesters take their basic necessities eg mat in the pastures | Harvesting | 1 | 2071 | Nag  |
| 1719 | Harvesters take their basic necessities eg mat in the pastures | Harvesting | 1 | 2073 | Nag  |
| 1720 | Harvesters take their basic necessities eg mat in the pastures | Harvesting | 1 | 2074 | Nag  |
| 1721 | Harvesters take their basic necessities eg mat in the pastures | Harvesting | 1 | 2074 | KP   |
| 1722 | Harvesters take their basic necessities eg mat in the pastures | Harvesting | 1 | 2071 | AP   |
| 1723 | Harvesters take their basic necessities eg mat in the pastures | Harvesting | 1 | 2071 | KP   |
| 1724 | Harvesters take their basic necessities eg mat in the pastures | Harvesting | 1 | 2073 | KP   |
| 1725 | Harvesters take their basic necessities eg mat in the pastures | Harvesting | 1 | 2068 | KP   |
| 1726 | Harvesters take their basic necessities eg mat in the pastures | Harvesting | 1 | 2070 | GKP  |
| 1727 | Harvesters take their basic necessities eg mat in the pastures | Harvesting | 1 | 2066 | AP   |
| 1728 | Harvesters take their basic necessities eg mat in the pastures | Harvesting | 1 | 2074 | AP   |

|      |                                                                                         |            |   |      |      |
|------|-----------------------------------------------------------------------------------------|------------|---|------|------|
| 1729 | Harvesters take their basic necessities eg mat in the pastures                          | Harvesting | 1 | 2076 | AP   |
| 1730 | Harvesters travel to neighbouring pastures                                              | Harvesting | 1 | 2068 | Raj  |
| 1731 | Harvesters travel to neighbouring pastures                                              | Harvesting | 1 | 2076 | AP   |
| 1732 | Harvesters unwilling to pay revenue of caterpillar fungus                               | Harvesting | 1 | 2070 | Raj  |
| 1733 | Harvesters use traditional hand made tools to collect caterpillar fungus eg kucho, kuto | Harvesting | 1 | 2071 | Naya |
| 1734 | Harvesters use traditional hand made tools to collect caterpillar fungus eg kucho, kuto | Harvesting | 1 | 2068 | GKP  |
| 1735 | Harvesters worried due to less collection of caterpillar fungus                         | Impacts    | 1 | 2065 | KP   |
| 1736 | Health problems of harvesters in the pastures                                           | Challenges | 1 | 2068 | KP   |
| 1737 | Health problems of harvesters in the pastures                                           | Challenges | 1 | 2071 | KP   |
| 1738 | Health problems of harvesters in the pastures                                           | Challenges | 1 | 2074 | KP   |
| 1739 | Health problems of harvesters in the pastures                                           | Challenges | 1 | 2065 | Raj  |
| 1740 | Health problems of harvesters in the pastures                                           | Challenges | 1 | 2066 | Raj  |
| 1741 | Health problems of harvesters in the pastures                                           | Challenges | 1 | 2068 | Raj  |
| 1742 | Health problems of harvesters in the pastures                                           | Challenges | 1 | 2070 | Raj  |
| 1743 | Health problems of harvesters in the pastures                                           | Challenges | 1 | 2073 | Nag  |
| 1744 | Health problems of harvesters in the pastures                                           | Challenges | 1 | 2068 | GKP  |
| 1745 | Health problems of harvesters in the pastures                                           | Challenges | 1 | 2070 | GKP  |
| 1746 | Health problems of harvesters in the pastures                                           | Challenges | 1 | 2065 | KP   |
| 1747 | Health problems of harvesters in the pastures                                           | Challenges | 1 | 2065 | KP   |
| 1748 | Health problems of harvesters in the pastures                                           | Challenges | 1 | 2076 | AP   |
| 1749 | Health problems of harvesters in the pastures                                           | Challenges | 1 | 2076 | AP   |
| 1750 | Health problems of harvesters in the pastures                                           | Challenges | 1 | 2076 | AP   |
| 1751 | Health problems of harvesters in the pastures                                           | Challenges | 1 | 2076 | AP   |
| 1752 | Health problems of harvesters in the pastures                                           | Challenges | 1 | 2076 | AP   |
| 1753 | Health problems of harvesters in the pastures                                           | Challenges | 1 | 2076 | AP   |
| 1754 | Health problems of harvesters in the pastures                                           | Challenges | 1 | 2076 | AP   |
| 1755 | Health problems of harvesters in the pastures                                           | Challenges | 1 | 2076 | AP   |
| 1756 | Health problems of harvesters in the pastures                                           | Challenges | 1 | 2078 | Nag  |
| 1757 | Health problems of harvesters in the pastures                                           | Challenges | 1 | 2078 | Ka   |

|      |                                                                       |             |   |      |      |
|------|-----------------------------------------------------------------------|-------------|---|------|------|
| 1758 | Health problems to aged harvesters (high altitude)                    | Challenges  | 1 | 2065 | KP   |
| 1759 | Heavy snowfall and late melting of snow in the pastures               | Information | 1 | 2065 | KP   |
| 1760 | Heavy snowfall and late melting of snow in the pastures               | Information | 1 | 2068 | KP   |
| 1761 | Heavy snowfall and late melting of snow in the pastures               | Information | 1 | 2071 | KP   |
| 1762 | Heavy snowfall and late melting of snow in the pastures               | Information | 1 | 2072 | KP   |
| 1763 | Heavy snowfall and late melting of snow in the pastures               | Information | 1 | 2072 | KP   |
| 1764 | Heavy snowfall and late melting of snow in the pastures               | Information | 1 | 2074 | KP   |
| 1765 | Heavy snowfall and late melting of snow in the pastures               | Information | 1 | 2076 | AP   |
| 1766 | Heavy snowfall and late melting of snow in the pastures               | Information | 1 | 2076 | AP   |
| 1767 | Heavy snowfall impacts wildlife                                       | Information | 1 | 2074 | KP   |
| 1768 | Heavy snowfall, high altitude snowslides, stranded due to bad weather | Information | 1 | 2074 | Ka   |
| 1769 | Heavy snowfall, high altitude snowslides, stranded due to bad weather | Information | 1 | 2067 | Nag  |
| 1770 | Heavy snowfall, high altitude snowslides, stranded due to bad weather | Information | 1 | 2067 | Nag  |
| 1771 | Heavy snowfall, high altitude snowslides, stranded due to bad weather | Information | 1 | 2072 | Nag  |
| 1772 | Heavy snowfall, high altitude snowslides, stranded due to bad weather | Information | 1 | 2072 | Ka   |
| 1773 | Heavy snowfall, high altitude snowslides, stranded due to bad weather | Information | 1 | 2072 | Ka   |
| 1774 | Heavy snowfall, high altitude snowslides, stranded due to bad weather | Information | 1 | 2072 | Ka   |
| 1775 | Heavy snowfall, high altitude snowslides, stranded due to bad weather | Information | 1 | 2074 | Ka   |
| 1776 | Heavy snowfall, high altitude snowslides, stranded due to bad weather | Information | 1 | 2071 | Ka   |
| 1777 | Heavy snowfall, high altitude snowslides, stranded due to bad weather | Information | 1 | 2071 | Naya |

|      |                                                                       |             |   |      |      |
|------|-----------------------------------------------------------------------|-------------|---|------|------|
| 1778 | Heavy snowfall, high altitude snowslides, stranded due to bad weather | Information | 1 | 2071 | KP   |
| 1779 | Heavy snowfall, high altitude snowslides, stranded due to bad weather | Information | 1 | 2068 | AP   |
| 1780 | Heavy snowfall, high altitude snowslides, stranded due to bad weather | Information | 1 | 2068 | AP   |
| 1781 | Heavy snowfall, high altitude snowslides, stranded due to bad weather | Information | 1 | 2072 | AP   |
| 1782 | Heavy snowfall, high altitude snowslides, stranded due to bad weather | Information | 1 | 2073 | Naya |
| 1783 | Heavy snowfall, high altitude snowslides, stranded due to bad weather | Information | 1 | 2073 | Naya |
| 1784 | Heavy snowfall, high altitude snowslides, stranded due to bad weather | Information | 1 | 2069 | Nag  |
| 1785 | Heavy snowfall, high altitude snowslides, stranded due to bad weather | Information | 1 | 2067 | AP   |
| 1786 | Heavy snowfall, high altitude snowslides, stranded due to bad weather | Information | 1 | 2071 | Ka   |
| 1787 | Heavy snowfall, high altitude snowslides, stranded due to bad weather | Information | 1 | 2071 | Ka   |
| 1788 | Heavy snowfall, high altitude snowslides, stranded due to bad weather | Information | 1 | 2070 | Nag  |
| 1789 | Heavy snowfall, high altitude snowslides, stranded due to bad weather | Information | 1 | 2070 | AP   |
| 1790 | Heavy snowfall, high altitude snowslides, stranded due to bad weather | Information | 1 | 2069 | KP   |
| 1791 | Heavy snowfall, high altitude snowslides, stranded due to bad weather | Information | 1 | 2069 | GKP  |
| 1792 | Heavy snowfall, high altitude snowslides, stranded due to bad weather | Information | 1 | 2073 | Naya |

|      |                                                                       |             |   |      |      |
|------|-----------------------------------------------------------------------|-------------|---|------|------|
| 1793 | Heavy snowfall, high altitude snowslides, stranded due to bad weather | Information | 1 | 2071 | Nag  |
| 1794 | Heavy snowfall, high altitude snowslides, stranded due to bad weather | Information | 1 | 2069 | Nag  |
| 1795 | Heavy snowfall, high altitude snowslides, stranded due to bad weather | Information | 1 | 2071 | KP   |
| 1796 | Heavy snowfall, high altitude snowslides, stranded due to bad weather | Information | 1 | 2071 | KP   |
| 1797 | Heavy snowfall, high altitude snowslides, stranded due to bad weather | Information | 1 | 2071 | KP   |
| 1798 | High dependency on caterpillar fungus income                          | Harvesting  | 1 | 2075 | AP   |
| 1799 | High dependency on caterpillar fungus income                          | Harvesting  | 1 | 2074 | AP   |
| 1800 | High dependency on caterpillar fungus income                          | Harvesting  | 1 | 2076 | AP   |
| 1801 | High income from caterpillar fungus upto 1.5 million Nepali rupees    | Harvesting  | 1 | 2075 | AP   |
| 1802 | High quality caterpillar fungus found in Nepal                        | Information | 1 | 2072 | KP   |
| 1803 | High quality caterpillar fungus found in Nepal                        | Information | 1 | 2074 | KP   |
| 1804 | High quality caterpillar fungus found in Nepal                        | Information | 1 | 2071 | KP   |
| 1805 | High quality caterpillar fungus found in Nepal                        | Information | 1 | 2073 | KP   |
| 1806 | High quality caterpillar fungus found in Nepal                        | Information | 1 | 2069 | KP   |
| 1807 | High quality caterpillar fungus found in Nepal                        | Information | 1 | 2070 | KP   |
| 1808 | High quality caterpillar fungus found in Nepal                        | Information | 1 | 2073 | KP   |
| 1809 | High quality caterpillar fungus found in Nepal                        | Information | 1 | 2067 | Naya |
| 1810 | High quality caterpillar fungus found in Nepal                        | Information | 1 | 2067 | Naya |
| 1811 | High quality caterpillar fungus found in Nepal                        | Information | 1 | 2072 | Naya |
| 1812 | High quality caterpillar fungus found in Nepal                        | Information | 1 | 2074 | Naya |
| 1813 | High quality caterpillar fungus found in Nepal                        | Information | 1 | 2068 | Nag  |
| 1814 | High quality caterpillar fungus found in Nepal                        | Information | 1 | 2070 | Nag  |
| 1815 | High quality caterpillar fungus found in Nepal                        | Information | 1 | 2069 | KP   |
| 1816 | High quality caterpillar fungus found in Nepal                        | Information | 1 | 2072 | KP   |
| 1817 | High quality caterpillar fungus found in Nepal                        | Information | 1 | 2073 | KP   |
| 1818 | High quality caterpillar fungus found in Nepal                        | Information | 1 | 2074 | KP   |

|      |                                                                                                                     |             |   |      |      |
|------|---------------------------------------------------------------------------------------------------------------------|-------------|---|------|------|
| 1819 | High quality caterpillar fungus found in Nepal                                                                      | Information | 1 | 2074 | KP   |
| 1820 | High quality caterpillar fungus found in Nepal                                                                      | Information | 1 | 2076 | AP   |
| 1821 | High quality caterpillar fungus found in Nepal                                                                      | Information | 1 | 2076 | AP   |
| 1822 | High quality caterpillar fungus found in Nepal                                                                      | Information | 1 | 2076 | AP   |
| 1823 | High quality caterpillar fungus found in Nepal (Dolpa)                                                              | Information | 1 | 2069 | Naya |
| 1824 | Higher priority of caterpillar fungus collection than other (developmental election, voter registration) activities | Impacts     | 1 | 2072 | KP   |
| 1825 | Higher priority of caterpillar fungus collection than other (developmental election, voter registration) activities | Impacts     | 1 | 2068 | Naya |
| 1826 | Higher priority of caterpillar fungus collection than other (developmental election, voter registration) activities | Impacts     | 1 | 2068 | Raj  |
| 1827 | Higher priority of caterpillar fungus collection than other (developmental election, voter registration) activities | Impacts     | 1 | 2068 | GKP  |
| 1828 | Higher priority of caterpillar fungus collection than other (developmental election, voter registration) activities | Impacts     | 1 | 2072 | Raj  |
| 1829 | Higher priority of caterpillar fungus collection than other (developmental election, voter registration) activities | Impacts     | 1 | 2068 | Raj  |
| 1830 | Higher priority of caterpillar fungus collection than other (developmental election, voter registration) activities | Impacts     | 1 | 2070 | AP   |
| 1831 | Higher priority of caterpillar fungus collection than other (developmental election, voter registration) activities | Impacts     | 1 | 2065 | KP   |
| 1832 | Higher priority of caterpillar fungus collection than other (developmental election, voter registration) activities | Impacts     | 1 | 2073 | KP   |
| 1833 | Higher priority of caterpillar fungus collection than other (developmental election, voter registration) activities | Impacts     | 1 | 2071 | Nag  |
| 1834 | Higher priority of caterpillar fungus collection than other (developmental election, voter registration) activities | Impacts     | 1 | 2065 | KP   |
| 1835 | Higher priority of caterpillar fungus collection than other (developmental election, voter registration) activities | Impacts     | 1 | 2070 | KP   |
| 1836 | Higher priority of caterpillar fungus collection than other (developmental election, voter registration) activities | Impacts     | 1 | 2068 | GKP  |



|      |                                                                                                                     |         |   |      |      |
|------|---------------------------------------------------------------------------------------------------------------------|---------|---|------|------|
| 1837 | Higher priority of caterpillar fungus collection than other (developmental election, voter registration) activities | Impacts | 1 | 2067 | Raj  |
| 1838 | Higher priority of caterpillar fungus collection than other (developmental election, voter registration) activities | Impacts | 1 | 2073 | Ka   |
| 1839 | Higher priority of caterpillar fungus collection than other (developmental election, voter registration) activities | Impacts | 1 | 2068 | Naya |
| 1840 | Higher priority of caterpillar fungus collection than other (developmental election, voter registration) activities | Impacts | 1 | 2068 | Raj  |
| 1841 | Higher priority of caterpillar fungus collection than other (developmental election, voter registration) activities | Impacts | 1 | 2070 | Ka   |
| 1842 | Higher priority of caterpillar fungus collection than other (developmental election, voter registration) activities | Impacts | 1 | 2068 | KP   |
| 1843 | Higher priority of caterpillar fungus collection than other (developmental election, voter registration) activities | Impacts | 1 | 2076 | AP   |
| 1844 | Higher priority of caterpillar fungus collection than other (developmental election, voter registration) activities | Impacts | 1 | 2076 | AP   |
| 1845 | Higher priority of caterpillar fungus collection than other (developmental election, voter registration) activities | Impacts | 1 | 2076 | AP   |
| 1846 | Higher priority of caterpillar fungus collection than other (developmental election, voter registration) activities | Impacts | 1 | 2076 | AP   |
| 1847 | Higher priority of caterpillar fungus collection than other (developmental election, voter registration) activities | Impacts | 1 | 2076 | AP   |
| 1848 | Higher priority of caterpillar fungus collection than other (developmental election, voter registration) activities | Impacts | 1 | 2075 | AP   |
| 1849 | Higher priority of caterpillar fungus collection than other (developmental election, voter registration) activities | Impacts | 1 | 2074 | AP   |
| 1850 | Higher priority of caterpillar fungus collection than other (developmental election, voter registration) activities | Impacts | 1 | 2074 | Naya |
| 1851 | Higher priority of caterpillar fungus collection than other (developmental election, voter registration) activities | Impacts | 1 | 2074 | Naya |
| 1852 | Higher priority of caterpillar fungus collection than other (developmental election, voter registration) activities | Impacts | 1 | 2075 | RAJ  |

|      |                                                                                                                                       |            |   |      |      |
|------|---------------------------------------------------------------------------------------------------------------------------------------|------------|---|------|------|
| 1853 | Higher priority of caterpillar fungus collection than other (developmental election, voter registration, school admission) activities | Impacts    | 1 | 2075 | AP   |
| 1854 | Higher priority of caterpillar fungus collection than other (education enrollment)                                                    | Impacts    | 1 | 2071 | Naya |
| 1855 | Higher priority of caterpillar fungus collection than other (wage based work)                                                         | Impacts    | 1 | 2065 | Raj  |
| 1856 | History of the caterpillar fungus collection                                                                                          | Harvesting | 1 | 2069 | KP   |
| 1857 | History of the caterpillar fungus collection                                                                                          | Harvesting | 1 | 2069 | KP   |
| 1858 | History of the caterpillar fungus collection                                                                                          | Harvesting | 1 | 2069 | KP   |
| 1859 | History of the caterpillar fungus collection                                                                                          | Harvesting | 1 | 2076 | AP   |
| 1860 | History of the caterpillar fungus collection                                                                                          | Harvesting | 1 | 2076 | AP   |
| 1861 | History of the caterpillar fungus collection                                                                                          | Harvesting | 1 | 2076 | AP   |
| 1862 | Illegal collectors arrested by the management committee                                                                               | Response   | 1 | 2078 | RAJ  |
| 1863 | Illegal trade of caterpillar fungus                                                                                                   | Trade      | 1 | 2072 | Nag  |
| 1864 | Illegal trade of caterpillar fungus                                                                                                   | Trade      | 1 | 2073 | Nag  |
| 1865 | Illegal trade of caterpillar fungus                                                                                                   | Trade      | 1 | 2070 | Ka   |
| 1866 | Illegal trade of caterpillar fungus                                                                                                   | Trade      | 1 | 2070 | AP   |
| 1867 | Illegal trade of caterpillar fungus                                                                                                   | Trade      | 1 | 2065 | KP   |
| 1868 | Illegal trade of caterpillar fungus                                                                                                   | Trade      | 1 | 2065 | KP   |
| 1869 | Illegal trade of caterpillar fungus                                                                                                   | Trade      | 1 | 2071 | Nag  |
| 1870 | Illegal trade of caterpillar fungus                                                                                                   | Trade      | 1 | 2071 | Ka   |
| 1871 | Illegal trade of caterpillar fungus                                                                                                   | Trade      | 1 | 2071 | Ka   |
| 1872 | Illegal trade of caterpillar fungus                                                                                                   | Trade      | 1 | 2073 | Ka   |
| 1873 | Illegal trade of caterpillar fungus                                                                                                   | Trade      | 1 | 2065 | AP   |
| 1874 | Illegal trade of caterpillar fungus                                                                                                   | Trade      | 1 | 2065 | AP   |
| 1875 | Illegal trade of caterpillar fungus                                                                                                   | Trade      | 1 | 2069 | AP   |
| 1876 | Illegal trade of caterpillar fungus                                                                                                   | Trade      | 1 | 2065 | Raj  |
| 1877 | Illegal trade of caterpillar fungus                                                                                                   | Trade      | 1 | 2065 | Raj  |
| 1878 | Illegal trade of caterpillar fungus                                                                                                   | Trade      | 1 | 2068 | Raj  |
| 1879 | Illegal trade of caterpillar fungus                                                                                                   | Trade      | 1 | 2069 | Raj  |
| 1880 | Illegal trade of caterpillar fungus                                                                                                   | Trade      | 1 | 2068 | Naya |
| 1881 | Illegal trade of caterpillar fungus                                                                                                   | Trade      | 1 | 2070 | Naya |

|      |                                     |       |   |      |      |
|------|-------------------------------------|-------|---|------|------|
| 1882 | Illegal trade of caterpillar fungus | Trade | 1 | 2072 | Naya |
| 1883 | Illegal trade of caterpillar fungus | Trade | 1 | 2072 | Nag  |
| 1884 | Illegal trade of caterpillar fungus | Trade | 1 | 2072 | Nag  |
| 1885 | Illegal trade of caterpillar fungus | Trade | 1 | 2072 | Nag  |
| 1886 | Illegal trade of caterpillar fungus | Trade | 1 | 2065 | GKP  |
| 1887 | Illegal trade of caterpillar fungus | Trade | 1 | 2071 | GKP  |
| 1888 | Illegal trade of caterpillar fungus | Trade | 1 | 2069 | KP   |
| 1889 | Illegal trade of caterpillar fungus | Trade | 1 | 2069 | KP   |
| 1890 | Illegal trade of caterpillar fungus | Trade | 1 | 2069 | KP   |
| 1891 | Illegal trade of caterpillar fungus | Trade | 1 | 2074 | KP   |
| 1892 | Illegal trade of caterpillar fungus | Trade | 1 | 2074 | KP   |
| 1893 | Illegal trade of caterpillar fungus | Trade | 1 | 2065 | KP   |
| 1894 | Illegal trade of caterpillar fungus | Trade | 1 | 2071 | KP   |
| 1895 | Illegal trade of caterpillar fungus | Trade | 1 | 2070 | KP   |
| 1896 | Illegal trade of caterpillar fungus | Trade | 1 | 2072 | AP   |
| 1897 | Illegal trade of caterpillar fungus | Trade | 1 | 2073 | Naya |
| 1898 | Illegal trade of caterpillar fungus | Trade | 1 | 2068 | Naya |
| 1899 | Illegal trade of caterpillar fungus | Trade | 1 | 2070 | Nag  |
| 1900 | Illegal trade of caterpillar fungus | Trade | 1 | 2070 | KP   |
| 1901 | Illegal trade of caterpillar fungus | Trade | 1 | 2071 | KP   |
| 1902 | Illegal trade of caterpillar fungus | Trade | 1 | 2068 | Raj  |
| 1903 | Illegal trade of caterpillar fungus | Trade | 1 | 2071 | Naya |
| 1904 | Illegal trade of caterpillar fungus | Trade | 1 | 2073 | Naya |
| 1905 | Illegal trade of caterpillar fungus | Trade | 1 | 2071 | Nag  |
| 1906 | Illegal trade of caterpillar fungus | Trade | 1 | 2070 | Nag  |
| 1907 | Illegal trade of caterpillar fungus | Trade | 1 | 2070 | KP   |
| 1908 | Illegal trade of caterpillar fungus | Trade | 1 | 2073 | KP   |
| 1909 | Illegal trade of caterpillar fungus | Trade | 1 | 2073 | KP   |
| 1910 | Illegal trade of caterpillar fungus | Trade | 1 | 2076 | AP   |
| 1911 | Illegal trade of caterpillar fungus | Trade | 1 | 2076 | AP   |
| 1912 | Illegal trade of caterpillar fungus | Trade | 1 | 2076 | AP   |

|      |                                                                      |             |   |      |      |
|------|----------------------------------------------------------------------|-------------|---|------|------|
| 1913 | Illegal trade of caterpillar fungus                                  | Trade       | 1 | 2071 | KP   |
| 1914 | Illegal trade of caterpillar fungus                                  | Trade       | 1 | 2074 | Naya |
| 1915 | Illegal trade of caterpillar fungus                                  | Trade       | 1 | 2069 | Nag  |
| 1916 | Illegal trade of caterpillar fungus                                  | Trade       | 1 | 2071 | Nag  |
| 1917 | Illegal trade of caterpillar fungus                                  | Trade       | 1 | 2073 | Nag  |
| 1918 | Illegal trade of caterpillar fungus (due to open border)             | Trade       | 1 | 2070 | KP   |
| 1919 | Illegal trade of caterpillar fungus (from India to Nepal to China)   | Trade       | 1 | 2072 | Ka   |
| 1920 | Illegal trade of caterpillar fungus (from India to Nepal)            | Trade       | 1 | 2073 | Ka   |
| 1921 | Illegal trade of caterpillar fungus (from India to Nepal)            | Trade       | 1 | 2069 | Nag  |
| 1922 | Illegal trade of caterpillar fungus (from India to Nepal)            | Trade       | 1 | 2068 | Naya |
| 1923 | Illegal trade of caterpillar fungus (harvesters as porters)          | Trade       | 1 | 2070 | Ka   |
| 1924 | Illegal trade of caterpillar fungus (including exports)              | Trade       | 1 | 2071 | Ka   |
| 1925 | Illegal trade of caterpillar fungus (including exports)              | Trade       | 1 | 2071 | Ka   |
| 1926 | Illegal trade of caterpillar fungus (including exports)              | Trade       | 1 | 2071 | Ka   |
| 1927 | Illegal trade of caterpillar fungus (including exports)              | Trade       | 1 | 2071 | Ka   |
| 1928 | Illegal trade of caterpillar fungus (including exports)              | Trade       | 1 | 2074 | GKP  |
| 1929 | Illegal trade of caterpillar fungus (including exports)              | Trade       | 1 | 2072 | Nag  |
| 1930 | Illegal trade of caterpillar fungus (security officials involvement) | Trade       | 1 | 2066 | Naya |
| 1931 | Illegal trade of caterpillar fungus (through Tibet)                  | Trade       | 1 | 2067 | Naya |
| 1932 | Illegal trade of caterpillar fungus (through Tibet)                  | Trade       | 1 | 2068 | Ka   |
| 1933 | Illegal trade of caterpillar fungus (without trade permits)          | Trade       | 1 | 2073 | Ka   |
| 1934 | Illegal trade of caterpillar fungus (without trade permits)          | Trade       | 1 | 2073 | Nag  |
| 1935 | Illegal trade of caterpillar fungus (without trade permits)          | Trade       | 1 | 2076 | AP   |
| 1936 | Illegal trade of caterpillar fungus                                  | Trade       | 1 | 2074 | Naya |
| 1937 | Illegal trader arrested with no trade permit                         | Response    | 1 | 2073 | AP   |
| 1938 | Illegal trader arrested with no trade permit                         | Response    | 1 | 2073 | KP   |
| 1939 | Impacts of climate change and pollution on caterpillar fungus        | Information | 1 | 2069 | AP   |
| 1940 | Impacts of climate change and pollution on caterpillar fungus        | Information | 1 | 2068 | Raj  |
| 1941 | Impacts of climate change on caterpillar fungus                      | Information | 1 | 2066 | Nag  |
| 1942 | Impacts of climate change on caterpillar fungus                      | Information | 1 | 2067 | Raj  |
| 1943 | Impacts of climate change on caterpillar fungus                      | Information | 1 | 2068 | Raj  |

|      |                                                                                                       |             |   |      |      |
|------|-------------------------------------------------------------------------------------------------------|-------------|---|------|------|
| 1944 | Impacts of climate change on caterpillar fungus                                                       | Information | 1 | 2068 | KP   |
| 1945 | Impacts of climate change on caterpillar fungus                                                       | Information | 1 | 2065 | KP   |
| 1946 | Impacts of climate change on caterpillar fungus                                                       | Information | 1 | 2070 | Nag  |
| 1947 | Impacts of climate change on caterpillar fungus                                                       | Information | 1 | 2076 | AP   |
| 1948 | Impacts of climate change on caterpillar fungus                                                       | Impacts     | 1 | 2077 | Nag  |
| 1949 | Impacts of climate change on caterpillar fungus                                                       | Impacts     | 1 | 2076 | Naya |
| 1950 | Impacts of COVID on caterpillar fungus trade                                                          | Impacts     | 1 | 2078 | Ka   |
| 1951 | Impacts of COVID on caterpillar fungus                                                                | Impacts     | 1 | 2078 | Nag  |
| 1952 | Impacts of COVID on caterpillar fungus collection                                                     | Impacts     | 1 | 2077 | Nag  |
| 1953 | Incidence of murder of harvesters                                                                     | Impacts     | 1 | 2072 | AP   |
| 1954 | Incidence of murder of harvesters                                                                     | Impacts     | 1 | 2070 | KP   |
| 1955 | Incidence of robbery and kidnapping of harvesters and traders. Weapons, Gun and Crime in the pastures | Impacts     | 1 | 2070 | KP   |
| 1956 | Incidence of robbery and kidnapping of harvesters and traders. Weapons, Gun and Crime in the pastures | Impacts     | 1 | 2068 | KP   |
| 1957 | Incidence of robbery and kidnapping of harvesters and traders. Weapons, Gun and Crime in the pastures | Impacts     | 1 | 2071 | KP   |
| 1958 | Incidence of robbery and kidnapping of harvesters and traders. Weapons, Gun and Crime in the pastures | Impacts     | 1 | 2072 | KP   |
| 1959 | Incidence of robbery and kidnapping of harvesters and traders. Weapons, Gun and Crime in the pastures | Impacts     | 1 | 2068 | Raj  |
| 1960 | Incidence of robbery and kidnapping of harvesters and traders. Weapons, Gun and Crime in the pastures | Impacts     | 1 | 2067 | GKP  |
| 1961 | Incidence of robbery and kidnapping of harvesters and traders. Weapons, Gun and Crime in the pastures | Impacts     | 1 | 2073 | KP   |
| 1962 | Incidence of robbery and kidnapping of harvesters and traders. Weapons, Gun and Crime in the pastures | Impacts     | 1 | 2071 | KP   |
| 1963 | Incidence of robbery and kidnapping of harvesters and traders. Weapons, Gun and Crime in the pastures | Impacts     | 1 | 2068 | Naya |
| 1964 | Incidence of robbery and kidnapping of harvesters and traders. Weapons, Gun and Crime in the pastures | Impacts     | 1 | 2071 | Nag  |

|      |                                                                                                       |         |   |      |     |
|------|-------------------------------------------------------------------------------------------------------|---------|---|------|-----|
| 1965 | Incidence of robbery and kidnapping of harvesters and traders. Weapons, Gun and Crime in the pastures | Impacts | 1 | 2073 | Raj |
| 1966 | Incidence of robbery and kidnapping of harvesters and traders. Weapons, Gun and Crime in the pastures | Impacts | 1 | 2069 | Ka  |
| 1967 | Incidence of robbery and kidnapping of harvesters and traders. Weapons, Gun and Crime in the pastures | Impacts | 1 | 2067 | KP  |
| 1968 | Incidence of robbery and kidnapping of harvesters and traders. Weapons, Gun and Crime in the pastures | Impacts | 1 | 2071 | KP  |
| 1969 | Incidence of robbery and kidnapping of harvesters and traders. Weapons, Gun and Crime in the pastures | Impacts | 1 | 2071 | KP  |
| 1970 | Incidence of robbery and kidnapping of harvesters and traders. Weapons, Gun and Crime in the pastures | Impacts | 1 | 2071 | KP  |
| 1971 | Incidence of robbery and kidnapping of harvesters and traders. Weapons, Gun and Crime in the pastures | Impacts | 1 | 2071 | KP  |
| 1972 | Incidence of robbery and kidnapping of harvesters and traders. Weapons, Gun and Crime in the pastures | Impacts | 1 | 2070 | KP  |
| 1973 | Incidence of robbery and kidnapping of harvesters and traders. Weapons, Gun and Crime in the pastures | Impacts | 1 | 2071 | Ka  |
| 1974 | Incidence of robbery and kidnapping of harvesters and traders. Weapons, Gun and Crime in the pastures | Impacts | 1 | 2069 | Nag |
| 1975 | Incidence of robbery and kidnapping of harvesters and traders. Weapons, Gun and Crime in the pastures | Impacts | 1 | 2068 | GKP |
| 1976 | Incidence of robbery and kidnapping of harvesters and traders. Weapons, Gun and Crime in the pastures | Impacts | 1 | 2068 | KP  |
| 1977 | Incidence of robbery and kidnapping of harvesters and traders. Weapons, Gun and Crime in the pastures | Impacts | 1 | 2069 | KP  |
| 1978 | Incidence of robbery and kidnapping of harvesters and traders. Weapons, Gun and Crime in the pastures | Impacts | 1 | 2071 | KP  |
| 1979 | Incidence of robbery and kidnapping of harvesters and traders. Weapons, Gun and Crime in the pastures | Impacts | 1 | 2070 | GKP |

|      |                                                                                                       |         |   |      |      |
|------|-------------------------------------------------------------------------------------------------------|---------|---|------|------|
| 1980 | Incidence of robbery and kidnapping of harvesters and traders. Weapons, Gun and Crime in the pastures | Impacts | 1 | 2068 | KP   |
| 1981 | Incidence of robbery and kidnapping of harvesters and traders. Weapons, Gun and Crime in the pastures | Impacts | 1 | 2065 | KP   |
| 1982 | Incidence of robbery and kidnapping of harvesters and traders. Weapons, Gun and Crime in the pastures | Impacts | 1 | 2065 | KP   |
| 1983 | Incidence of robbery and kidnapping of harvesters and traders. Weapons, Gun and Crime in the pastures | Impacts | 1 | 2067 | KP   |
| 1984 | Incidence of robbery and kidnapping of harvesters and traders. Weapons, Gun and Crime in the pastures | Impacts | 1 | 2068 | KP   |
| 1985 | Incidence of robbery and kidnapping of harvesters and traders. Weapons, Gun and Crime in the pastures | Impacts | 1 | 2068 | KP   |
| 1986 | Incidence of robbery and kidnapping of harvesters and traders. Weapons, Gun and Crime in the pastures | Impacts | 1 | 2071 | KP   |
| 1987 | Incidence of robbery and kidnapping of harvesters and traders. Weapons, Gun and Crime in the pastures | Impacts | 1 | 2073 | KP   |
| 1988 | Incidence of robbery and kidnapping of harvesters and traders. Weapons, Gun and Crime in the pastures | Impacts | 1 | 2066 | AP   |
| 1989 | Incidence of robbery and kidnapping of harvesters and traders. Weapons, Gun and Crime in the pastures | Impacts | 1 | 2068 | AP   |
| 1990 | Incidence of robbery and kidnapping of harvesters and traders. Weapons, Gun and Crime in the pastures | Impacts | 1 | 2069 | AP   |
| 1991 | Incidence of robbery and kidnapping of harvesters and traders. Weapons, Gun and Crime in the pastures | Impacts | 1 | 2074 | AP   |
| 1992 | Incidence of robbery and kidnapping of harvesters and traders. Weapons, Gun and Crime in the pastures | Impacts | 1 | 2066 | Raj  |
| 1993 | Incidence of robbery and kidnapping of harvesters and traders. Weapons, Gun and Crime in the pastures | Impacts | 1 | 2067 | Raj  |
| 1994 | Incidence of robbery and kidnapping of harvesters and traders. Weapons, Gun and Crime in the pastures | Impacts | 1 | 2071 | Naya |

|      |                                                                                                       |         |   |      |      |
|------|-------------------------------------------------------------------------------------------------------|---------|---|------|------|
| 1995 | Incidence of robbery and kidnapping of harvesters and traders. Weapons, Gun and Crime in the pastures | Impacts | 1 | 2066 | Nag  |
| 1996 | Incidence of robbery and kidnapping of harvesters and traders. Weapons, Gun and Crime in the pastures | Impacts | 1 | 2072 | AP   |
| 1997 | Incidence of robbery and kidnapping of harvesters and traders. Weapons, Gun and Crime in the pastures | Impacts | 1 | 2071 | Ka   |
| 1998 | Incidence of robbery and kidnapping of harvesters and traders. Weapons, Gun and Crime in the pastures | Impacts | 1 | 2065 | Naya |
| 1999 | Incidence of robbery and kidnapping of harvesters and traders. Weapons, Gun and Crime in the pastures | Impacts | 1 | 2068 | Naya |
| 2000 | Incidence of robbery and kidnapping of harvesters and traders. Weapons, Gun and Crime in the pastures | Impacts | 1 | 2067 | Nag  |
| 2001 | Incidence of robbery and kidnapping of harvesters and traders. Weapons, Gun and Crime in the pastures | Impacts | 1 | 2071 | Nag  |
| 2002 | Incidence of robbery and kidnapping of harvesters and traders. Weapons, Gun and Crime in the pastures | Impacts | 1 | 2071 | Nag  |
| 2003 | Incidence of robbery and kidnapping of harvesters and traders. Weapons, Gun and Crime in the pastures | Impacts | 1 | 2073 | Nag  |
| 2004 | Incidence of robbery and kidnapping of harvesters and traders. Weapons, Gun and Crime in the pastures | Impacts | 1 | 2068 | Raj  |
| 2005 | Incidence of robbery and kidnapping of harvesters and traders. Weapons, Gun and Crime in the pastures | Impacts | 1 | 2068 | KP   |
| 2006 | Incidence of robbery and kidnapping of harvesters and traders. Weapons, Gun and Crime in the pastures | Impacts | 1 | 2068 | KP   |
| 2007 | Incidence of robbery and kidnapping of harvesters and traders. Weapons, Gun and Crime in the pastures | Impacts | 1 | 2071 | KP   |
| 2008 | Incidence of robbery and kidnapping of harvesters and traders. Weapons, Gun and Crime in the pastures | Impacts | 1 | 2073 | KP   |
| 2009 | Incidence of robbery and kidnapping of harvesters and traders. Weapons, Gun and Crime in the pastures | Impacts | 1 | 2073 | KP   |



|      |                                                                                                       |         |   |      |     |
|------|-------------------------------------------------------------------------------------------------------|---------|---|------|-----|
| 2010 | Incidence of robbery and kidnapping of harvesters and traders. Weapons, Gun and Crime in the pastures | Impacts | 1 | 2071 | Ka  |
| 2011 | Incidence of robbery and kidnapping of harvesters and traders. Weapons, Gun and Crime in the pastures | Impacts | 1 | 2069 | GKP |
| 2012 | Incidence of robbery and kidnapping of harvesters and traders. Weapons, Gun and Crime in the pastures | Impacts | 1 | 2070 | GKP |
| 2013 | Incidence of robbery and kidnapping of harvesters and traders. Weapons, Gun and Crime in the pastures | Impacts | 1 | 2072 | GKP |
| 2014 | Incidence of robbery and kidnapping of harvesters and traders. Weapons, Gun and Crime in the pastures | Impacts | 1 | 2068 | KP  |
| 2015 | Incidence of robbery and kidnapping of harvesters and traders. Weapons, Gun and Crime in the pastures | Impacts | 1 | 2074 | KP  |
| 2016 | Incidence of robbery and kidnapping of harvesters and traders. Weapons, Gun and Crime in the pastures | Impacts | 1 | 2069 | KP  |
| 2017 | Incidence of robbery and kidnapping of harvesters and traders. Weapons, Gun and Crime in the pastures | Impacts | 1 | 2069 | KP  |
| 2018 | Incidence of robbery and kidnapping of harvesters and traders. Weapons, Gun and Crime in the pastures | Impacts | 1 | 2070 | KP  |
| 2019 | Income from caterpillar fungus considered 'fate income'                                               | Impacts | 1 | 2070 | KP  |
| 2020 | Income from caterpillar fungus discouraged labor migration                                            | Impacts | 1 | 2072 | KP  |
| 2021 | Income from caterpillar fungus discouraged labor migration                                            | Impacts | 1 | 2072 | KP  |
| 2022 | Income from caterpillar fungus trade                                                                  | Trade   | 1 | 2072 | KP  |
| 2023 | Income from caterpillar fungus trade                                                                  | Trade   | 1 | 2074 | KP  |
| 2024 | Income from caterpillar fungus trade                                                                  | Trade   | 1 | 2072 | KP  |
| 2025 | Income from caterpillar fungus trade                                                                  | Trade   | 1 | 2071 | KP  |
| 2026 | Income from caterpillar fungus trade                                                                  | Trade   | 1 | 2072 | KP  |
| 2027 | Income from caterpillar fungus trade                                                                  | Trade   | 1 | 2072 | KP  |
| 2028 | Income from caterpillar fungus trade                                                                  | Trade   | 1 | 2069 | KP  |
| 2029 | Income from caterpillar fungus trade                                                                  | Trade   | 1 | 2071 | KP  |
| 2030 | Income from caterpillar fungus trade                                                                  | Trade   | 1 | 2071 | KP  |
| 2031 | Income from caterpillar fungus trade                                                                  | Trade   | 1 | 2071 | KP  |

|      |                                                  |         |   |      |      |
|------|--------------------------------------------------|---------|---|------|------|
| 2032 | Income from caterpillar fungus trade             | Trade   | 1 | 2077 | AP   |
| 2033 | Income from caterpillar fungus trade             | Trade   | 1 | 2077 | AP   |
| 2034 | Income from caterpillar fungus trade             | Trade   | 1 | 2077 | AP   |
| 2035 | Income from caterpillar fungus trade             | Trade   | 1 | 2077 | AP   |
| 2036 | Income from caterpillar fungus trade             | Trade   | 1 | 2077 | AP   |
| 2037 | Income of the harvesters from caterpillar fungus | Impacts | 1 | 2072 | KP   |
| 2038 | Income of the harvesters from caterpillar fungus | Impacts | 1 | 2070 | KP   |
| 2039 | Income of the harvesters from caterpillar fungus | Impacts | 1 | 2070 | KP   |
| 2040 | Income of the harvesters from caterpillar fungus | Impacts | 1 | 2069 | KP   |
| 2041 | Income of the harvesters from caterpillar fungus | Impacts | 1 | 2068 | KP   |
| 2042 | Income of the harvesters from caterpillar fungus | Impacts | 1 | 2068 | KP   |
| 2043 | Income of the harvesters from caterpillar fungus | Impacts | 1 | 2069 | KP   |
| 2044 | Income of the harvesters from caterpillar fungus | Impacts | 1 | 2069 | KP   |
| 2045 | Income of the harvesters from caterpillar fungus | Impacts | 1 | 2069 | KP   |
| 2046 | Income of the harvesters from caterpillar fungus | Impacts | 1 | 2068 | Raj  |
| 2047 | Income of the harvesters from caterpillar fungus | Impacts | 1 | 2067 | Naya |
| 2048 | Income of the harvesters from caterpillar fungus | Impacts | 1 | 2074 | Ka   |
| 2049 | Income of the harvesters from caterpillar fungus | Impacts | 1 | 2068 | KP   |
| 2050 | Income of the harvesters from caterpillar fungus | Impacts | 1 | 2069 | GKP  |
| 2051 | Income of the harvesters from caterpillar fungus | Impacts | 1 | 2074 | Raj  |
| 2052 | Income of the harvesters from caterpillar fungus | Impacts | 1 | 2073 | AP   |
| 2053 | Income of the harvesters from caterpillar fungus | Impacts | 1 | 2071 | Nag  |
| 2054 | Income of the harvesters from caterpillar fungus | Impacts | 1 | 2074 | KP   |
| 2055 | Income of the harvesters from caterpillar fungus | Impacts | 1 | 2072 | AP   |
| 2056 | Income of the harvesters from caterpillar fungus | Impacts | 1 | 2071 | KP   |
| 2057 | Income of the harvesters from caterpillar fungus | Impacts | 1 | 2069 | KP   |
| 2058 | Income of the harvesters from caterpillar fungus | Impacts | 1 | 2067 | KP   |
| 2059 | Income of the harvesters from caterpillar fungus | Impacts | 1 | 2073 | KP   |
| 2060 | Income of the harvesters from caterpillar fungus | Impacts | 1 | 2071 | AP   |
| 2061 | Increased availability of caterpillar fungus     | Impacts | 1 | 2069 | AP   |
| 2062 | Increased availability of caterpillar fungus     | Impacts | 1 | 2072 | GKP  |

|      |                                                                     |            |   |      |      |
|------|---------------------------------------------------------------------|------------|---|------|------|
| 2063 | Increased availability of caterpillar fungus                        | Impacts    | 1 | 2071 | Raj  |
| 2064 | Increased coldness in the pasture                                   | Challenges | 1 | 2069 | Naya |
| 2065 | Increased crime in the pasture                                      | Impacts    | 1 | 2074 | KP   |
| 2066 | Increased demand of caterpillar fungus (as the traders reach home)  | Trade      | 1 | 2072 | KP   |
| 2067 | Increased demand of caterpillar fungus (as the traders reach home)  | Trade      | 1 | 2069 | Naya |
| 2068 | Increased entry fees due to conflict                                | Governance | 1 | 2071 | Raj  |
| 2069 | Increased food cost at the pastures                                 | Harvesting | 1 | 2067 | Naya |
| 2070 | Increased food cost at the pastures                                 | Harvesting | 1 | 2069 | KP   |
| 2071 | Increased food cost at the pastures                                 | Harvesting | 1 | 2074 | KP   |
| 2072 | Increased food cost at the pastures                                 | Harvesting | 1 | 2071 | KP   |
| 2073 | Increased land price                                                | Impacts    | 1 | 2069 | Naya |
| 2074 | Increased livestock price                                           | Impacts    | 1 | 2071 | Nag  |
| 2075 | Increased number of manpower for revenue collection in the pastures | Governance | 1 | 2069 | Naya |
| 2076 | Increased price of caterpillar fungus                               | Trade      | 1 | 2070 | Naya |
| 2077 | Increased price of caterpillar fungus                               | Trade      | 1 | 2071 | KP   |
| 2078 | Increased price of caterpillar fungus                               | Trade      | 1 | 2070 | GKP  |
| 2079 | Increased price of caterpillar fungus                               | Trade      | 1 | 2070 | Naya |
| 2080 | Increased price of caterpillar fungus                               | Trade      | 1 | 2066 | KP   |
| 2081 | Increased price of caterpillar fungus                               | Trade      | 1 | 2071 | Raj  |
| 2082 | Increased price of caterpillar fungus                               | Trade      | 1 | 2071 | KP   |
| 2083 | Increased price of caterpillar fungus                               | Trade      | 1 | 2068 | Naya |
| 2084 | Increased price of caterpillar fungus                               | Trade      | 1 | 2070 | GKP  |
| 2085 | Increased price of caterpillar fungus                               | Trade      | 1 | 2070 | GKP  |
| 2086 | Increased price of caterpillar fungus                               | Trade      | 1 | 2074 | GKP  |
| 2087 | Increased price of caterpillar fungus                               | Trade      | 1 | 2072 | Ka   |
| 2088 | Increased price of caterpillar fungus                               | Trade      | 1 | 2073 | Nag  |
| 2089 | Increased price of caterpillar fungus (due to less availability)    | Trade      | 1 | 2073 | Nag  |
| 2090 | Increased price of caterpillar fungus (no trade in HK)              | Trade      | 1 | 2068 | KP   |
| 2091 | Increased price of caterpillar fungus (no trade)                    | Trade      | 1 | 2071 | AP   |
| 2092 | Ineffecive monitoring of illegal trade of caterpillar fungus        | Gap        | 1 | 2068 | Raj  |
| 2093 | Ineffecive monitoring of illegal trade of caterpillar fungus        | Gap        | 1 | 2071 | Nag  |

|      |                                                                                        |       |   |      |      |
|------|----------------------------------------------------------------------------------------|-------|---|------|------|
| 2094 | Ineffecive monitoring of illegal trade of caterpillar fungus                           | Gap   | 1 | 2071 | Ka   |
| 2095 | Ineffecive monitoring of illegal trade of caterpillar fungus                           | Gap   | 1 | 2071 | Nag  |
| 2096 | Ineffecive monitoring of illegal trade of caterpillar fungus                           | Gap   | 1 | 2073 | Nag  |
| 2097 | Ineffecive monitoring of illegal trade of caterpillar fungus                           | Gap   | 1 | 2066 | KP   |
| 2098 | Ineffecive monitoring of illegal trade of caterpillar fungus                           | Gap   | 1 | 2072 | KP   |
| 2099 | Ineffecive monitoring of illegal trade of caterpillar fungus                           | Gap   | 1 | 2068 | Naya |
| 2100 | Ineffective management of the state                                                    | Gap   | 1 | 2070 | GKP  |
| 2101 | Ineffective management of the state                                                    | Gap   | 1 | 2070 | GKP  |
| 2102 | Ineffective management of the state                                                    | Gap   | 1 | 2065 | AP   |
| 2103 | Ineffective monitoring (illegal fungus and wildlife trade) due to less human resources | Gap   | 1 | 2068 | Raj  |
| 2104 | Ineffective monitoring (illegal fungus and wildlife trade) due to less human resources | Gap   | 1 | 2069 | Naya |
| 2105 | Ineffective monitoring (illegal fungus and wildlife trade) due to less human resources | Gap   | 1 | 2069 | Nag  |
| 2106 | Ineffective monitoring (illegal fungus and wildlife trade) due to less human resources | Gap   | 1 | 2071 | Nag  |
| 2107 | Ineffective monitoring (illegal fungus and wildlife trade) due to less human resources | Gap   | 1 | 2073 | Ka   |
| 2108 | Ineffective monitoring (illegal fungus and wildlife trade) due to less human resources | Gap   | 1 | 2067 | AP   |
| 2109 | Ineffective monitoring (illegal fungus and wildlife trade) due to less human resources | Gap   | 1 | 2071 | Ka   |
| 2110 | Ineffective monitoring (illegal fungus and wildlife trade) due to less human resources | Gap   | 1 | 2071 | Nag  |
| 2111 | Ineffective monitoring (illegal fungus and wildlife trade) due to less human resources | Gap   | 1 | 2068 | KP   |
| 2112 | Ineffective monitoring (illegal fungus and wildlife trade) due to less human resources | Gap   | 1 | 2069 | KP   |
| 2113 | Influence of middlemen in the caterpillar fungus trade                                 | Trade | 1 | 2071 | KP   |
| 2114 | Influence of middlemen in the caterpillar fungus trade                                 | Trade | 1 | 2071 | KP   |

|      |                                                        |            |   |      |      |
|------|--------------------------------------------------------|------------|---|------|------|
| 2115 | Influence of middlemen in the caterpillar fungus trade | Trade      | 1 | 2071 | KP   |
| 2116 | Influence of middlemen in the caterpillar fungus trade | Trade      | 1 | 2071 | KP   |
| 2117 | Influence of middlemen in the caterpillar fungus trade | Trade      | 1 | 2073 | KP   |
| 2118 | Influence of middlemen in the caterpillar fungus trade | Trade      | 1 | 2074 | KP   |
| 2119 | Influence of middlemen in the caterpillar fungus trade | Trade      | 1 | 2070 | GKP  |
| 2120 | Influence of middlemen in the caterpillar fungus trade | Trade      | 1 | 2068 | KP   |
| 2121 | Insecurity due to remoteness of pastures               | Challenges | 1 | 2069 | KP   |
| 2122 | Insecurity due to remoteness of pastures               | Challenges | 1 | 2069 | KP   |
| 2123 | Insecurity due to remoteness of pastures               | Challenges | 1 | 2071 | KP   |
| 2124 | Insecurity due to remoteness of pastures               | Challenges | 1 | 2071 | KP   |
| 2125 | Insecurity due to remoteness of pastures               | Challenges | 1 | 2071 | Nag  |
| 2126 | Insecurity due to remoteness of pastures               | Challenges | 1 | 2071 | KP   |
| 2127 | Insecurity due to remoteness of pastures               | Challenges | 1 | 2071 | Ka   |
| 2128 | Insecurity due to remoteness of pastures               | Challenges | 1 | 2068 | Nag  |
| 2129 | Insecurity due to remoteness of pastures               | Challenges | 1 | 2071 | Nag  |
| 2130 | Insecurity due to remoteness of pastures               | Challenges | 1 | 2068 | Raj  |
| 2131 | Insecurity due to remoteness of pastures               | Challenges | 1 | 2073 | Raj  |
| 2132 | Insecurity due to remoteness of pastures               | Challenges | 1 | 2067 | AP   |
| 2133 | Insecurity due to remoteness of pastures               | Challenges | 1 | 2066 | KP   |
| 2134 | Insecurity due to remoteness of pastures               | Challenges | 1 | 2072 | Nag  |
| 2135 | Insecurity due to remoteness of pastures               | Challenges | 1 | 2069 | Naya |
| 2136 | Insecurity due to remoteness of pastures               | Challenges | 1 | 2071 | Nag  |
| 2137 | Insecurity due to remoteness of pastures               | Challenges | 1 | 2071 | Ka   |
| 2138 | Insecurity due to remoteness of pastures               | Challenges | 1 | 2065 | Naya |
| 2139 | Insecurity due to remoteness of pastures               | Challenges | 1 | 2071 | Nag  |
| 2140 | Insecurity in the pastures                             | Challenges | 1 | 2067 | KP   |
| 2141 | Insecurity in the pastures                             | Challenges | 1 | 2073 | KP   |
| 2142 | Insecurity in the pastures                             | Challenges | 1 | 2073 | KP   |
| 2143 | Insecurity in the pastures                             | Challenges | 1 | 2067 | KP   |
| 2144 | Insecurity in the pastures                             | Challenges | 1 | 2074 | Naya |
| 2145 | Insecurity in the pastures                             | Challenges | 1 | 2066 | Naya |

|      |                                                                         |             |   |      |     |
|------|-------------------------------------------------------------------------|-------------|---|------|-----|
| 2146 | Insecurity in the pastures                                              | Challenges  | 1 | 2067 | Raj |
| 2147 | Insecurity in the pastures                                              | Challenges  | 1 | 2069 | KP  |
| 2148 | Insecurity in the pastures                                              | Challenges  | 1 | 2071 | AP  |
| 2149 | Insecurity in the pastures                                              | Challenges  | 1 | 2068 | Nag |
| 2150 | Insecurity in the village due to reverse migration                      | Challenges  | 1 | 2065 | AP  |
| 2151 | Insecurity to collectors from outside districts                         | Challenges  | 1 | 2065 | Raj |
| 2152 | Insecurity to trade caterpillar fungus                                  | Challenges  | 1 | 2066 | Raj |
| 2153 | Insecurity to trade caterpillar fungus                                  | Challenges  | 1 | 2069 | Nag |
| 2154 | Insufficient snowfall and rainfall in the pasture                       | Information | 1 | 2071 | Nag |
| 2155 | Insufficient snowfall and rainfall in the pasture                       | Information | 1 | 2065 | GKP |
| 2156 | Insufficient snowfall and rainfall in the pasture                       | Information | 1 | 2069 | GKP |
| 2157 | Insufficient snowfall and rainfall in the pasture                       | Information | 1 | 2077 | AP  |
| 2158 | Insufficient snowfall linked to decreased caterpillar fungus production | Information | 1 | 2070 | GKP |
| 2159 | Insufficient snowfall linked to decreased caterpillar fungus production | Information | 1 | 2072 | AP  |
| 2160 | Insufficient snowfall linked to decreased caterpillar fungus production | Information | 1 | 2072 | KP  |
| 2161 | Insufficient snowfall linked to decreased caterpillar fungus production | Information | 1 | 2069 | Nag |
| 2162 | Insufficient snowfall linked to decreased caterpillar fungus production | Information | 1 | 2072 | AP  |
| 2163 | Insufficient snowfall linked to decreased caterpillar fungus production | Information | 1 | 2071 | KP  |
| 2164 | Interest of international traders to purchase caterpillar fungus        | Trade       | 1 | 2069 | Nag |
| 2165 | Interest of international traders to purchase caterpillar fungus        | Trade       | 1 | 2073 | AP  |
| 2166 | Interest of international traders to purchase caterpillar fungus        | Trade       | 1 | 2071 | Nag |
| 2167 | Interest of international traders to purchase caterpillar fungus        | Trade       | 1 | 2071 | KP  |
| 2168 | Interest of international traders to purchase caterpillar fungus        | Trade       | 1 | 2071 | KP  |
| 2169 | Interest of international traders to purchase caterpillar fungus        | Trade       | 1 | 2073 | AP  |
| 2170 | Interest of international traders to purchase caterpillar fungus        | Trade       | 1 | 2071 | Nag |

|      |                                                                                         |          |   |      |      |
|------|-----------------------------------------------------------------------------------------|----------|---|------|------|
| 2171 | Interest of international traders to purchase caterpillar fungus                        | Trade    | 1 | 2065 | GKP  |
| 2172 | Interest of international traders to purchase caterpillar fungus                        | Trade    | 1 | 2070 | GKP  |
| 2173 | Interest of international traders to purchase caterpillar fungus                        | Trade    | 1 | 2073 | Nag  |
| 2174 | Interest of international traders to purchase caterpillar fungus                        | Trade    | 1 | 2066 | AP   |
| 2175 | Interest of international traders to purchase caterpillar fungus                        | Trade    | 1 | 2077 | AP   |
| 2176 | Interest of local traders to purchase caterpillar fungus                                | Trade    | 1 | 2067 | AP   |
| 2177 | Interest of local traders to purchase caterpillar fungus                                | Trade    | 1 | 2069 | AP   |
| 2178 | Interest of local traders to purchase caterpillar fungus                                | Trade    | 1 | 2072 | AP   |
| 2179 | Interest of local traders to purchase caterpillar fungus                                | Trade    | 1 | 2074 | AP   |
| 2180 | Interest of politician in caterpillar fungus trade                                      | Trade    | 1 | 2065 | KP   |
| 2181 | Interest of politician in caterpillar fungus trade                                      | Trade    | 1 | 2069 | KP   |
| 2182 | Interest of politician in caterpillar fungus trade                                      | Trade    | 1 | 2072 | KP   |
| 2183 | Interest of various stakeholders in caterpillar fungus conservation                     | Response | 1 | 2069 | Naya |
| 2184 | Interest of various stakeholders in caterpillar fungus conservation                     | Response | 1 | 2073 | Nag  |
| 2185 | Interest of various stakeholders in caterpillar fungus conservation                     | Response | 1 | 2072 | Nag  |
| 2186 | Interest of various stakeholders in caterpillar fungus conservation                     | Response | 1 | 2069 | Nag  |
| 2187 | Interest of various stakeholders in caterpillar fungus conservation                     | Response | 1 | 2077 | AP   |
| 2188 | Interest of various stakeholders in caterpillar fungus conservation                     | Response | 1 | 2077 | AP   |
| 2189 | Interest of various stakeholders in caterpillar fungus conservation                     | Response | 1 | 2077 | AP   |
| 2190 | International market price of caterpillar fungus having direct impact in Nepal's fungus | Trade    | 1 | 2071 | Ka   |
| 2191 | International markets of Nepal's caterpillar fungus                                     | Trade    | 1 | 2068 | Raj  |
| 2192 | International markets of Nepal's caterpillar fungus                                     | Trade    | 1 | 2069 | Nag  |
| 2193 | International markets of Nepal's caterpillar fungus                                     | Trade    | 1 | 2068 | GKP  |
| 2194 | International markets of Nepal's caterpillar fungus                                     | Trade    | 1 | 2068 | GKP  |
| 2195 | International markets of Nepal's caterpillar fungus                                     | Trade    | 1 | 2068 | GKP  |
| 2196 | International markets of Nepal's caterpillar fungus                                     | Trade    | 1 | 2068 | GKP  |
| 2197 | International markets of Nepal's caterpillar fungus                                     | Trade    | 1 | 2068 | GKP  |
| 2198 | International markets of Nepal's caterpillar fungus                                     | Trade    | 1 | 2069 | GKP  |
| 2199 | International markets of Nepal's caterpillar fungus                                     | Trade    | 1 | 2070 | GKP  |
| 2200 | International markets of Nepal's caterpillar fungus                                     | Trade    | 1 | 2070 | GKP  |

|      |                                                                        |            |   |      |     |
|------|------------------------------------------------------------------------|------------|---|------|-----|
| 2201 | International markets of Nepal's caterpillar fungus                    | Trade      | 1 | 2074 | GKP |
| 2202 | International markets of Nepal's caterpillar fungus                    | Trade      | 1 | 2070 | KP  |
| 2203 | International markets of Nepal's caterpillar fungus                    | Trade      | 1 | 2069 | GKP |
| 2204 | International markets of Nepal's caterpillar fungus                    | Trade      | 1 | 2077 | AP  |
| 2205 | International markets of Nepal's caterpillar fungus                    | Trade      | 1 | 2077 | AP  |
| 2206 | International markets of Nepal's caterpillar fungus                    | Trade      | 1 | 2077 | AP  |
| 2207 | International markets of Nepal's caterpillar fungus                    | Trade      | 1 | 2077 | AP  |
| 2208 | International markets of Nepal's caterpillar fungus                    | Trade      | 1 | 2077 | AP  |
| 2209 | International markets of Nepal's caterpillar fungus                    | Trade      | 1 | 2077 | AP  |
| 2210 | International markets of Nepal's caterpillar fungus                    | Trade      | 1 | 2078 | Nag |
| 2211 | International markets of Nepal's caterpillar fungus                    | Trade      | 1 | 2077 | RAJ |
| 2212 | International markets of Nepal's caterpillar fungus                    | Trade      | 1 | 2078 | RAJ |
| 2213 | International trader having less knowledge of resource policy of Nepal | Gap        | 1 | 2068 | Raj |
| 2214 | Investment of caterpillar fungus income in unproductive sector         | Harvesting | 1 | 2073 | Raj |
| 2215 | Investment of caterpillar fungus income in unproductive sector         | Harvesting | 1 | 2071 | Nag |
| 2216 | Investment of caterpillar fungus income to consumables                 | Harvesting | 1 | 2066 | AP  |
| 2217 | Involvement of children in caterpillar fungus harvesting               | Impacts    | 1 | 2066 | AP  |
| 2218 | Involvement of children in caterpillar fungus harvesting               | Impacts    | 1 | 2068 | AP  |
| 2219 | Involvement of children in caterpillar fungus harvesting               | Impacts    | 1 | 2071 | AP  |
| 2220 | Involvement of children in caterpillar fungus harvesting               | Impacts    | 1 | 2074 | AP  |
| 2221 | Involvement of children in caterpillar fungus harvesting               | Impacts    | 1 | 2066 | GKP |
| 2222 | Involvement of children in caterpillar fungus harvesting               | Impacts    | 1 | 2066 | GKP |
| 2223 | Involvement of children in caterpillar fungus harvesting               | Impacts    | 1 | 2067 | GKP |
| 2224 | Involvement of children in caterpillar fungus harvesting               | Impacts    | 1 | 2068 | GKP |
| 2225 | Involvement of children in caterpillar fungus harvesting               | Impacts    | 1 | 2071 | KP  |
| 2226 | Involvement of children in caterpillar fungus harvesting               | Impacts    | 1 | 2069 | AP  |
| 2227 | Involvement of children in caterpillar fungus harvesting               | Impacts    | 1 | 2071 | KP  |
| 2228 | Involvement of children in caterpillar fungus harvesting               | Impacts    | 1 | 2070 | AP  |
| 2229 | Involvement of children in caterpillar fungus harvesting               | Impacts    | 1 | 2067 | GKP |
| 2230 | Involvement of children in caterpillar fungus harvesting               | Impacts    | 1 | 2070 | GKP |



|      |                                                          |         |   |      |      |
|------|----------------------------------------------------------|---------|---|------|------|
| 2231 | Involvement of children in caterpillar fungus harvesting | Impacts | 1 | 2066 | AP   |
| 2232 | Involvement of children in caterpillar fungus harvesting | Impacts | 1 | 2072 | AP   |
| 2233 | Involvement of children in caterpillar fungus harvesting | Impacts | 1 | 2067 | Naya |
| 2234 | Involvement of children in caterpillar fungus harvesting | Impacts | 1 | 2071 | Nag  |
| 2235 | Involvement of children in caterpillar fungus harvesting | Impacts | 1 | 2072 | KP   |
| 2236 | Involvement of children in caterpillar fungus harvesting | Impacts | 1 | 2065 | KP   |
| 2237 | Involvement of children in caterpillar fungus harvesting | Impacts | 1 | 2065 | KP   |
| 2238 | Involvement of children in caterpillar fungus harvesting | Impacts | 1 | 2071 | KP   |
| 2239 | Involvement of children in caterpillar fungus harvesting | Impacts | 1 | 2071 | KP   |
| 2240 | Involvement of children in caterpillar fungus harvesting | Impacts | 1 | 2072 | KP   |
| 2241 | Involvement of children in caterpillar fungus harvesting | Impacts | 1 | 2072 | KP   |
| 2242 | Involvement of children in caterpillar fungus harvesting | Impacts | 1 | 2068 | Raj  |
| 2243 | Involvement of children in caterpillar fungus harvesting | Impacts | 1 | 2068 | Naya |
| 2244 | Involvement of children in caterpillar fungus harvesting | Impacts | 1 | 2068 | Raj  |
| 2245 | Involvement of children in caterpillar fungus harvesting | Impacts | 1 | 2066 | AP   |
| 2246 | Involvement of children in caterpillar fungus harvesting | Impacts | 1 | 2069 | AP   |
| 2247 | Involvement of children in caterpillar fungus harvesting | Impacts | 1 | 2069 | AP   |
| 2248 | Involvement of children in caterpillar fungus harvesting | Impacts | 1 | 2074 | AP   |
| 2249 | Involvement of children in caterpillar fungus harvesting | Impacts | 1 | 2067 | Naya |
| 2250 | Involvement of children in caterpillar fungus harvesting | Impacts | 1 | 2073 | GKP  |
| 2251 | Involvement of children in caterpillar fungus harvesting | Impacts | 1 | 2065 | KP   |
| 2252 | Involvement of children in caterpillar fungus harvesting | Impacts | 1 | 2067 | Raj  |
| 2253 | Involvement of children in caterpillar fungus harvesting | Impacts | 1 | 2077 | AP   |
| 2254 | Involvement of children in caterpillar fungus harvesting | Impacts | 1 | 2077 | AP   |
| 2255 | Involvement of children in caterpillar fungus harvesting | Impacts | 1 | 2077 | AP   |
| 2256 | Involvement of children in caterpillar fungus harvesting | Impacts | 1 | 2077 | AP   |
| 2257 | Involvement of children in caterpillar fungus harvesting | Impacts | 1 | 2077 | AP   |
| 2258 | Involvement of children in caterpillar fungus harvesting | Impacts | 1 | 2078 | AP   |
| 2259 | Involvement of children in caterpillar fungus harvesting | Impacts | 1 | 2078 | AP   |
| 2260 | Involvement of children in caterpillar fungus harvesting | Impacts | 1 | 2078 | AP   |
| 2261 | Involvement of children in caterpillar fungus harvesting | Impacts | 1 | 2078 | AP   |

|      |                                                             |            |   |      |      |
|------|-------------------------------------------------------------|------------|---|------|------|
| 2262 | Involvement of children in caterpillar fungus harvesting    | Impacts    | 1 | 2078 | AP   |
| 2263 | Involvement of children in caterpillar fungus harvesting    | Impacts    | 1 | 2078 | AP   |
| 2264 | Involvement of children in caterpillar fungus harvesting    | Impacts    | 1 | 2078 | AP   |
| 2265 | Involvement of children in caterpillar fungus harvesting    | Impacts    | 1 | 2078 | AP   |
| 2266 | Involvement of children in caterpillar fungus harvesting    | Impacts    | 1 | 2078 | AP   |
| 2267 | Involvement of children in caterpillar fungus harvesting    | Impacts    | 1 | 2075 | Naya |
| 2268 | Involvement of children in caterpillar fungus harvesting    | Impacts    | 1 | 2075 | Naya |
| 2269 | Involvement of children in caterpillar fungus harvesting    | Impacts    | 1 | 2075 | Naya |
| 2270 | Involvement of children in caterpillar fungus harvesting    | Impacts    | 1 | 2075 | Naya |
| 2271 | Involvement of children in caterpillar fungus harvesting    | Impacts    | 1 | 2075 | Naya |
| 2272 | Involvement of children in caterpillar fungus harvesting    | Impacts    | 1 | 2075 | AP   |
| 2273 | Involvement of children in caterpillar fungus harvesting    | Impacts    | 1 | 2075 | AP   |
| 2274 | Involvement of children in caterpillar fungus harvesting    | Impacts    | 1 | 2076 | AP   |
| 2275 | Irregularities in revenue collected from caterpillar fungus | Impacts    | 1 | 2066 | Raj  |
| 2276 | Irregularities in revenue collected from caterpillar fungus | Impacts    | 1 | 2073 | Ka   |
| 2277 | Irregularities in revenue collected from caterpillar fungus | Impacts    | 1 | 2070 | GKP  |
| 2278 | Irregularities in revenue collected from caterpillar fungus | Impacts    | 1 | 2074 | Ka   |
| 2279 | Irregularities in revenue collected from caterpillar fungus | Impacts    | 1 | 2075 | Naya |
| 2280 | Issuance of collection/trade permits of caterpillar fungus  | Governance | 1 | 2066 | AP   |
| 2281 | Issuance of collection/trade permits of caterpillar fungus  | Governance | 1 | 2074 | AP   |
| 2282 | Issuance of collection/trade permits of caterpillar fungus  | Governance | 1 | 2068 | GKP  |
| 2283 | Issuance of collection/trade permits of caterpillar fungus  | Governance | 1 | 2065 | KP   |
| 2284 | Issuance of collection/trade permits of caterpillar fungus  | Governance | 1 | 2068 | Raj  |
| 2285 | Issuance of collection/trade permits of caterpillar fungus  | Governance | 1 | 2071 | KP   |
| 2286 | Issuance of collection/trade permits of caterpillar fungus  | Governance | 1 | 2071 | AP   |
| 2287 | Issuance of collection/trade permits of caterpillar fungus  | Governance | 1 | 2071 | KP   |
| 2288 | Issuance of collection/trade permits of caterpillar fungus  | Governance | 1 | 2071 | Nag  |
| 2289 | Issuance of collection/trade permits of caterpillar fungus  | Governance | 1 | 2067 | Raj  |
| 2290 | Issuance of collection/trade permits of caterpillar fungus  | Governance | 1 | 2070 | Naya |
| 2291 | Issuance of collection/trade permits of caterpillar fungus  | Governance | 1 | 2065 | Naya |
| 2292 | Issuance of collection/trade permits of caterpillar fungus  | Governance | 1 | 2069 | AP   |

|      |                                                            |             |   |      |      |
|------|------------------------------------------------------------|-------------|---|------|------|
| 2293 | Issuance of collection/trade permits of caterpillar fungus | Governance  | 1 | 2073 | Nag  |
| 2294 | Issuance of collection/trade permits of caterpillar fungus | Governance  | 1 | 2072 | Naya |
| 2295 | Issuance of collection/trade permits of caterpillar fungus | Governance  | 1 | 2072 | KP   |
| 2296 | Issuance of collection/trade permits of caterpillar fungus | Governance  | 1 | 2073 | KP   |
| 2297 | Issuance of collection/trade permits of caterpillar fungus | Governance  | 1 | 2072 | Nag  |
| 2298 | Issuance of collection/trade permits of caterpillar fungus | Governance  | 1 | 2074 | KP   |
| 2299 | Issuance of collection/trade permits of caterpillar fungus | Governance  | 1 | 2072 | Ka   |
| 2300 | Issuance of collection/trade permits of caterpillar fungus | Governance  | 1 | 2065 | AP   |
| 2301 | Issuance of collection/trade permits of caterpillar fungus | Governance  | 1 | 2072 | KP   |
| 2302 | Issuance of collection/trade permits of caterpillar fungus | Impacts     | 1 | 2075 | Naya |
| 2303 | Issuance of collection/trade permits of caterpillar fungus | Impacts     | 1 | 2075 | Naya |
| 2304 | Issuance of collection/trade permits of caterpillar fungus | Impacts     | 1 | 2075 | Naya |
| 2305 | Issuance of collection/trade permits of caterpillar fungus | Impacts     | 1 | 2075 | Naya |
| 2306 | Issuance of collection/trade permits of caterpillar fungus | Impacts     | 1 | 2078 | Nag  |
| 2307 | Issuance of collection/trade permits of caterpillar fungus | Impacts     | 1 | 2078 | Nag  |
| 2308 | Issuance of collection/trade permits of caterpillar fungus | Impacts     | 1 | 2078 | Nag  |
| 2309 | Issues related with resource ownership                     | Governance  | 1 | 2071 | KP   |
| 2310 | Issues related with resource ownership                     | Governance  | 1 | 2071 | Nag  |
| 2311 | Issues related with resource ownership                     | Governance  | 1 | 2070 | AP   |
| 2312 | Issues related with resource ownership                     | Governance  | 1 | 2071 | KP   |
| 2313 | Issues related with resource ownership                     | Governance  | 1 | 2071 | Nag  |
| 2315 | Issues with sustainable management of caterpillar fungus   | Impacts     | 1 | 2075 | Naya |
| 2314 | Issues with sustainable management of caterpillar fungus   | Information | 1 | 2068 | Raj  |
| 2316 | Lack of access to price information to harvesters          | Gap         | 1 | 2073 | Nag  |
| 2317 | Lack of access to price information to harvesters          | Gap         | 1 | 2076 | Ka   |
| 2318 | Lack of better preparation by harvesters (health kits)     | Harvesting  | 1 | 2065 | KP   |
| 2319 | Lack of consciousness on conservation on collectors        | Gap         | 1 | 2069 | KP   |
| 2320 | Lack of consciousness on conservation on collectors        | Gap         | 1 | 2074 | Naya |
| 2321 | Lack of consciousness on conservation on collectors        | Gap         | 1 | 2076 | Naya |
| 2322 | Lack of control of collectors                              | Gap         | 1 | 2071 | Ka   |
| 2323 | Lack of control of collectors                              | Gap         | 1 | 2071 | Ka   |

|      |                                                                    |             |   |      |      |
|------|--------------------------------------------------------------------|-------------|---|------|------|
| 2324 | Lack of control of collectors                                      | Gap         | 1 | 2075 | Naya |
| 2325 | Lack of control of collectors                                      | Gap         | 1 | 2078 | Nag  |
| 2326 | Lack of coordination among the state agencies                      | Gap         | 1 | 2074 | AP   |
| 2327 | Lack of coordination among the state agencies                      | Gap         | 1 | 2068 | KP   |
| 2328 | Lack of custom officer in function                                 | Gap         | 1 | 2072 | KP   |
| 2329 | Lack of implementation of herbs related regulations                | Gap         | 1 | 2071 | KP   |
| 2330 | Lack of implementation of recommendation on sustainable harvesting | Gap         | 1 | 2073 | KP   |
| 2331 | Lack of implementation of recommendation on sustainable harvesting | Gap         | 1 | 2071 | Nag  |
| 2332 | Lack of information on harvesters to pick caterpillar fungus       | Gap         | 1 | 2065 | AP   |
| 2333 | Lack of knowledge of life cycle of the caterpillar fungus growth   | Gap         | 1 | 2065 | AP   |
| 2334 | Lack of knowledge of life cycle of the caterpillar fungus growth   | Gap         | 1 | 2069 | AP   |
| 2335 | Lack of market management (labour value)                           | Trade       | 1 | 2072 | KP   |
| 2336 | Lack of market management (labour value)                           | Trade       | 1 | 2075 | Naya |
| 2337 | Lack of market management (labour value)                           | Trade       | 1 | 2075 | Naya |
| 2338 | Lack of medical facilities in the pastures                         | Challenges  | 1 | 2073 | KP   |
| 2339 | Lack of medical facilities in the pastures                         | Challenges  | 1 | 2065 | AP   |
| 2340 | Lack of preparation by harvesters (medical)                        | Challenges  | 1 | 2065 | Raj  |
| 2341 | Lack of preparation by harvesters (medical)                        | Challenges  | 1 | 2070 | Raj  |
| 2342 | Lack of preparation by harvesters (medical)                        | Challenges  | 1 | 2072 | KP   |
| 2343 | Lack of preparation by harvesters (medical)                        | Challenges  | 1 | 2072 | KP   |
| 2344 | Lack of preparation by harvesters (medical)                        | Challenges  | 1 | 2065 | Raj  |
| 2345 | Lack of preparation by harvesters (medical)                        | Challenges  | 1 | 2075 | Naya |
| 2346 | Lack of preparation by harvesters (medical)                        | Challenges  | 1 | 2075 | Naya |
| 2347 | Lack of preparation by harvesters (medical)                        | Challenges  | 1 | 2075 | Naya |
| 2348 | Lack of preparation by harvesters (medical)                        | Challenges  | 1 | 2075 | Naya |
| 2349 | Lack of preparation by harvesters (medical)                        | Challenges  | 1 | 2075 | Naya |
| 2350 | Lack of preparation by harvesters (medical)                        | Challenges  | 1 | 2075 | Naya |
| 2351 | Lack of preparation by harvesters (medical)                        | Challenges  | 1 | 2078 | Nag  |
| 2352 | Lack of preparation by harvesters (medical)                        | Challenges  | 1 | 2078 | Ka   |
| 2353 | Lack of quality life in Himalayan region                           | Information | 1 | 2072 | KP   |
| 2354 | Lack of quality life in Himalayan region                           | Information | 1 | 2072 | Nag  |

|      |                                                                         |            |   |      |      |
|------|-------------------------------------------------------------------------|------------|---|------|------|
| 2355 | Lack of safe drinking water in pastures                                 | Challenges | 1 | 2073 | GKP  |
| 2356 | Lack of safe drinking water in pastures                                 | Challenges | 1 | 2072 | KP   |
| 2357 | Lack of state's willingness to curb illegal smugglers                   | Gap        | 1 | 2066 | Raj  |
| 2358 | Land and Airports used for trade of caterpillar fungus                  | Trade      | 1 | 2068 | Naya |
| 2359 | Land and Airports used for trade of caterpillar fungus                  | Trade      | 1 | 2074 | GKP  |
| 2360 | Land and Airports used for trade of caterpillar fungus                  | Trade      | 1 | 2068 | Raj  |
| 2361 | Late collection of caterpillar fungus due to bad weather                | Harvesting | 1 | 2073 | KP   |
| 2362 | Less market information of the caterpillar fungus to harvesters         | Gap        | 1 | 2074 | KP   |
| 2363 | Limited entry time/duration to pastures                                 | Harvesting | 1 | 2069 | Naya |
| 2364 | Livelihood changes (occupations shift) due to caterpillar fungus income | Impacts    | 1 | 2070 | KP   |
| 2365 | Livelihood changes (occupations shift) due to caterpillar fungus income | Impacts    | 1 | 2070 | KP   |
| 2366 | Livelihood changes (occupations shift) due to caterpillar fungus income | Impacts    | 1 | 2071 | KP   |
| 2367 | Livelihood changes (occupations shift) due to caterpillar fungus income | Impacts    | 1 | 2072 | KP   |
| 2368 | Livelihood changes (occupations shift) due to caterpillar fungus income | Impacts    | 1 | 2072 | KP   |
| 2369 | Livelihood changes (occupations shift) due to caterpillar fungus income | Impacts    | 1 | 2070 | GKP  |
| 2370 | Livelihood changes (occupations shift) due to caterpillar fungus income | Impacts    | 1 | 2068 | KP   |
| 2371 | Livelihood changes (occupations shift) due to caterpillar fungus income | Impacts    | 1 | 2069 | KP   |
| 2372 | Livelihood changes (occupations shift) due to caterpillar fungus income | Impacts    | 1 | 2070 | KP   |
| 2373 | Livelihood changes (occupations shift) due to caterpillar fungus income | Impacts    | 1 | 2071 | Nag  |
| 2374 | Livelihood changes (occupations shift) due to caterpillar fungus income | Impacts    | 1 | 2071 | Nag  |

|      |                                                                            |             |   |      |      |
|------|----------------------------------------------------------------------------|-------------|---|------|------|
| 2375 | Livelihood changes (occupations shift) due to caterpillar fungus income    | Impacts     | 1 | 2071 | Nag  |
| 2376 | Livestock grazing impacts the production of caterpillar fungus             | Information | 1 | 2069 | AP   |
| 2377 | Local institutions collect their entry fees                                | Governance  | 1 | 2065 | GKP  |
| 2378 | Local institutions collect their entry fees                                | Governance  | 1 | 2073 | Raj  |
| 2379 | Local institutions collect their entry fees                                | Governance  | 1 | 2076 | Naya |
| 2380 | Local traders interested in purchasing caterpillar fungus                  | Trade       | 1 | 2072 | Raj  |
| 2381 | Local traders interested in purchasing caterpillar fungus                  | Trade       | 1 | 2073 | GKP  |
| 2382 | Local traders interested in purchasing caterpillar fungus                  | Trade       | 1 | 2067 | KP   |
| 2383 | Local traders provide collectors basic supplies in credit                  | Trade       | 1 | 2073 | KP   |
| 2384 | Locals not require to pay entry fee for the collection                     | Governance  | 1 | 2074 | KP   |
| 2385 | Locals unsure about the climate change effects                             | Information | 1 | 2074 | KP   |
| 2386 | Low quality of caterpillar fungus found in low altitude                    | Information | 1 | 2065 | Naya |
| 2387 | Low quality of caterpillar fungus found in low altitude                    | Information | 1 | 2070 | KP   |
| 2388 | Low quality of caterpillar fungus found in low altitude                    | Information | 1 | 2067 | AP   |
| 2389 | Low quality of caterpillar fungus found in low altitude                    | Information | 1 | 2072 | KP   |
| 2390 | Management cases of caterpillar fungus                                     | Governance  | 1 | 2076 | Naya |
| 2391 | Management cases of caterpillar fungus                                     | Governance  | 1 | 2076 | Naya |
| 2392 | Management cases of caterpillar fungus                                     | Governance  | 1 | 2076 | Naya |
| 2393 | Management cases of caterpillar fungus                                     | Information | 1 | 2074 | KP   |
| 2394 | Management of caterpillar fungus                                           | Governance  | 1 | 2076 | Naya |
| 2395 | Management of caterpillar fungus                                           | Governance  | 1 | 2076 | Naya |
| 2396 | Management of caterpillar fungus                                           | Governance  | 1 | 2076 | Naya |
| 2397 | Management plans of caterpillar fungus at local level                      | Information | 1 | 2068 | Raj  |
| 2398 | Market of caterpillar fungus (China 90%)                                   | Trade       | 1 | 2073 | Nag  |
| 2399 | Market of caterpillar fungus (China 90%)                                   | Trade       | 1 | 2067 | AP   |
| 2400 | Market of the caterpillar fungus reported                                  | Trade       | 1 | 2076 | AP   |
| 2401 | Misconception of caterpillar fungus usage                                  | Information | 1 | 2069 | KP   |
| 2402 | Mismatch of quantity of caterpillar fungus collected and revenue collected | Impacts     | 1 | 2071 | KP   |

|      |                                                                            |         |   |      |      |
|------|----------------------------------------------------------------------------|---------|---|------|------|
| 2403 | Mismatch of quantity of caterpillar fungus collected and revenue collected | Impacts | 1 | 2074 | KP   |
| 2404 | Mismatch of quantity of caterpillar fungus collected and revenue collected | Impacts | 1 | 2072 | KP   |
| 2405 | Mismatch of quantity of caterpillar fungus collected and revenue collected | Impacts | 1 | 2071 | Ka   |
| 2406 | Mismatch of quantity of caterpillar fungus collected and revenue collected | Impacts | 1 | 2070 | GKP  |
| 2407 | Mismatch of quantity of caterpillar fungus collected and revenue collected | Impacts | 1 | 2065 | KP   |
| 2408 | Mismatch of quantity of caterpillar fungus collected and revenue collected | Impacts | 1 | 2070 | KP   |
| 2409 | Mismatch of quantity of caterpillar fungus collected and revenue collected | Impacts | 1 | 2070 | KP   |
| 2410 | Mismatch of quantity of caterpillar fungus collected and revenue collected | Impacts | 1 | 2071 | KP   |
| 2411 | Mismatch of quantity of caterpillar fungus collected and revenue collected | Impacts | 1 | 2067 | Raj  |
| 2412 | Mismatch of quantity of caterpillar fungus collected and revenue collected | Impacts | 1 | 2069 | Raj  |
| 2413 | Mismatch of quantity of caterpillar fungus collected and revenue collected | Impacts | 1 | 2069 | Raj  |
| 2414 | Mismatch of quantity of caterpillar fungus collected and revenue collected | Impacts | 1 | 2069 | Raj  |
| 2415 | Mismatch of quantity of caterpillar fungus collected and revenue collected | Impacts | 1 | 2069 | Raj  |
| 2416 | Mismatch of quantity of caterpillar fungus collected and revenue collected | Impacts | 1 | 2068 | Naya |
| 2417 | Mismatch of quantity of caterpillar fungus collected and revenue collected | Impacts | 1 | 2072 | Naya |

|      |                                                                            |          |   |      |      |
|------|----------------------------------------------------------------------------|----------|---|------|------|
| 2418 | Mismatch of quantity of caterpillar fungus collected and revenue collected | Impacts  | 1 | 2073 | Naya |
| 2419 | Mismatch of quantity of caterpillar fungus collected and revenue collected | Impacts  | 1 | 2072 | Nag  |
| 2420 | Mismatch of quantity of caterpillar fungus collected and revenue collected | Impacts  | 1 | 2072 | Nag  |
| 2421 | Mismatch of quantity of caterpillar fungus collected and revenue collected | Impacts  | 1 | 2070 | AP   |
| 2422 | Mismatch of quantity of caterpillar fungus collected and revenue collected | Impacts  | 1 | 2076 | Naya |
| 2423 | Mismatch of quantity of caterpillar fungus collected and revenue collected | Impacts  | 1 | 2076 | Naya |
| 2424 | Mismatch of revenue and international market price of caterpillar fungus   | Gap      | 1 | 2067 | Naya |
| 2425 | Mismatch of revenue and international market price of caterpillar fungus   | Gap      | 1 | 2071 | Naya |
| 2426 | Mismatch of revenue and international market price of caterpillar fungus   | Impacts  | 1 | 2076 | Naya |
| 2427 | Mismatch of revenue and international market price of caterpillar fungus   | Impacts  | 1 | 2076 | Naya |
| 2428 | Mobilisation of security in the pastures                                   | Response | 1 | 2068 | GKP  |
| 2429 | Mobilisation of security in the pastures                                   | Response | 1 | 2072 | KP   |
| 2430 | Mobilisation of security in the pastures                                   | Response | 1 | 2072 | KP   |
| 2431 | Mobilisation of security in the pastures                                   | Response | 1 | 2073 | KP   |
| 2432 | Mobilisation of security in the pastures                                   | Response | 1 | 2071 | Nag  |
| 2433 | Mobilisation of security in the pastures                                   | Response | 1 | 2074 | KP   |
| 2434 | Mobilisation of security in the pastures                                   | Response | 1 | 2073 | Nag  |
| 2435 | Mobilisation of security in the pastures                                   | Response | 1 | 2074 | KP   |
| 2436 | Mobilisation of security in the pastures                                   | Response | 1 | 2072 | Naya |
| 2437 | Mobilisation of security in the pastures                                   | Response | 1 | 2067 | Nag  |
| 2438 | Mobilisation of security in the pastures                                   | Response | 1 | 2073 | Nag  |



|      |                                                      |            |   |      |      |
|------|------------------------------------------------------|------------|---|------|------|
| 2439 | Mobilisation of security in the pastures             | Response   | 1 | 2065 | AP   |
| 2440 | Mobilisation of security in the pastures             | Response   | 1 | 2065 | AP   |
| 2441 | Mobilisation of security in the pastures             | Response   | 1 | 2069 | AP   |
| 2442 | Mobilisation of security in the pastures             | Response   | 1 | 2072 | AP   |
| 2443 | Mobilisation of security in the pastures             | Response   | 1 | 2071 | Ka   |
| 2444 | Mobilisation of security in the pastures             | Response   | 1 | 2073 | Ka   |
| 2445 | Mobilisation of security in the pastures             | Response   | 1 | 2074 | Ka   |
| 2446 | Mobilisation of security in the pastures             | Response   | 1 | 2074 | Ka   |
| 2447 | Mobilisation of security in the pastures             | Response   | 1 | 2069 | Raj  |
| 2448 | Mobilisation of security in the pastures             | Response   | 1 | 2073 | Nag  |
| 2449 | Mobilisation of security in the pastures             | Response   | 1 | 2073 | Nag  |
| 2450 | Mobilisation of security in the pastures             | Response   | 1 | 2073 | GKP  |
| 2451 | Mobilisation of security in the pastures             | Response   | 1 | 2073 | GKP  |
| 2452 | Mobilisation of security in the pastures             | Response   | 1 | 2065 | KP   |
| 2453 | Mobilisation of security in the pastures             | Response   | 1 | 2071 | KP   |
| 2454 | Mobilisation of security in the pastures             | Response   | 1 | 2071 | Nag  |
| 2455 | Mobilisation of security in the pastures             | Response   | 1 | 2068 | Naya |
| 2456 | Mobilisation of security in the pastures             | Response   | 1 | 2074 | AP   |
| 2457 | Mobilisation of security in the pastures             | Response   | 1 | 2070 | Ka   |
| 2458 | Mobilisation of security in the pastures             | Response   | 1 | 2071 | Raj  |
| 2459 | Mobilisation of security in the pastures             | Response   | 1 | 2073 | GKP  |
| 2460 | Mobilisation of security in the pastures             | Response   | 1 | 2073 | KP   |
| 2461 | Mobilization of security in the pastures             | Response   | 1 | 2076 | AP   |
| 2462 | Money devaluation due to excess cash in the pastures | Impacts    | 1 | 2071 | Nag  |
| 2463 | Monitoring of Tibetan border                         | Response   | 1 | 2071 | KP   |
| 2464 | Monitoring of Tibetan border                         | Response   | 1 | 2071 | Nag  |
| 2465 | Month of opening of the pasture                      | Harvesting | 1 | 2076 | AP   |
| 2466 | Need of conservation of caterpillar fungus           | Gap        | 1 | 2073 | Nag  |
| 2467 | Need of conservation of caterpillar fungus           | Gap        | 1 | 2076 | Naya |
| 2468 | Need of conservation of caterpillar fungus           | Gap        | 1 | 2076 | Naya |
| 2469 | Need of conservation of caterpillar fungus           | Gap        | 1 | 2076 | Naya |
| 2470 | Need of conservation of caterpillar fungus           | Gap        | 1 | 2076 | Naya |

|      |                                                                             |       |   |      |      |
|------|-----------------------------------------------------------------------------|-------|---|------|------|
| 2471 | Need of conservation of caterpillar fungus                                  | Gap   | 1 | 2076 | Naya |
| 2472 | Need of conservation of caterpillar fungus                                  | Gap   | 1 | 2076 | Naya |
| 2473 | Need of conservation of caterpillar fungus                                  | Gap   | 1 | 2076 | Naya |
| 2474 | Need of conservation of caterpillar fungus                                  | Gap   | 1 | 2076 | Naya |
| 2475 | Need of conservation of caterpillar fungus                                  | Gap   | 1 | 2076 | Naya |
| 2476 | Need of conservation of caterpillar fungus                                  | Gap   | 1 | 2076 | Naya |
| 2477 | Need of conservation of caterpillar fungus                                  | Gap   | 1 | 2078 | Naya |
| 2478 | Need of conservation of caterpillar fungus                                  | Gap   | 1 | 2078 | Naya |
| 2479 | Need of harvesting guidelines that promote export of caterpillar fungus     | Gap   | 1 | 2074 | Naya |
| 2480 | Need of harvesting guidelines that promote export of caterpillar fungus     | Gap   | 1 | 2078 | Naya |
| 2481 | Need of harvesting guidelines that promote export of caterpillar fungus     | Gap   | 1 | 2078 | Naya |
| 2482 | Need of insurance of the harvesters                                         | Gap   | 1 | 2074 | Naya |
| 2483 | Need of insurance of the harvesters                                         | Gap   | 1 | 2075 | KP   |
| 2484 | Need of insurance of the harvesters                                         | Gap   | 1 | 2075 | KP   |
| 2485 | Need of insurance of the harvesters                                         | Gap   | 1 | 2075 | KP   |
| 2486 | Need of insurance of the harvesters                                         | Gap   | 1 | 2075 | KP   |
| 2487 | Need of local agent as a trader                                             | Trade | 1 | 2065 | AP   |
| 2488 | Need of pasture management reported                                         | Gap   | 1 | 2066 | AP   |
| 2489 | Need of pasture management reported                                         | Gap   | 1 | 2067 | AP   |
| 2490 | Need of plants database inventory                                           | Gap   | 1 | 2065 | GKP  |
| 2491 | Need of plants database inventory                                           | Gap   | 1 | 2066 | AP   |
| 2492 | Need of policy integration for sustainable management of caterpillar fungus | Gap   | 1 | 2072 | Nag  |
| 2493 | Need of policy integration for sustainable management of caterpillar fungus | Gap   | 1 | 2072 | Nag  |
| 2494 | Need of policy integration for sustainable management of caterpillar fungus | Gap   | 1 | 2071 | Nag  |

|      |                                                                             |             |   |      |      |
|------|-----------------------------------------------------------------------------|-------------|---|------|------|
| 2495 | Need of policy integration for sustainable management of caterpillar fungus | Gap         | 1 | 2075 | KP   |
| 2496 | Need of purchase of caterpillar fungus by state                             | Gap         | 1 | 2071 | Nag  |
| 2497 | Need of relocating settlements from the caterpillar fungus pasture          | Gap         | 1 | 2072 | KP   |
| 2498 | Need of scientific study of caterpillar fungus                              | Gap         | 1 | 2071 | Nag  |
| 2499 | Need of scientific study of caterpillar fungus                              | Gap         | 1 | 2070 | KP   |
| 2500 | Need of scientific study of caterpillar fungus                              | Gap         | 1 | 2073 | Ka   |
| 2501 | Need of scientific study of caterpillar fungus                              | Gap         | 1 | 2068 | Raj  |
| 2502 | Need of scientific study of caterpillar fungus                              | Gap         | 1 | 2071 | Nag  |
| 2503 | Need of studying district wise caterpillar fungus production                | Gap         | 1 | 2068 | Raj  |
| 2504 | Need of value addition of caterpillar fungus                                | Trade       | 1 | 2071 | KP   |
| 2505 | Need of value addition of caterpillar fungus                                | Trade       | 1 | 2066 | KP   |
| 2506 | Need to local agent rather outside traders                                  | Trade       | 1 | 2072 | Ka   |
| 2507 | Need to managed caterpillar fungus collection activities                    | Gap         | 1 | 2066 | Raj  |
| 2508 | Need to value addition to caterpillar fungus                                | Trade       | 1 | 2073 | Nag  |
| 2509 | Need to value addition to caterpillar fungus                                | Trade       | 1 | 2074 | AP   |
| 2510 | New pastures to harvest caterpillar fungus                                  | Information | 1 | 2071 | Nag  |
| 2511 | New pastures in high snow zone                                              | Information | 1 | 2069 | Naya |
| 2512 | No buyers for the caterpillar fungus                                        | Trade       | 1 | 2071 | Nag  |
| 2513 | No buyers for the caterpillar fungus                                        | Trade       | 1 | 2072 | Ka   |
| 2514 | No buyers for the caterpillar fungus                                        | Trade       | 1 | 2075 | KP   |
| 2515 | No buyers for the caterpillar fungus                                        | Trade       | 1 | 2075 | KP   |
| 2516 | No buyers for the caterpillar fungus                                        | Trade       | 1 | 2075 | KP   |
| 2517 | No buyers for the caterpillar fungus                                        | Trade       | 1 | 2075 | KP   |
| 2518 | No compensation paid after harvesters death                                 | Gap         | 1 | 2070 | GKP  |
| 2519 | No compensation paid after harvesters death                                 | Gap         | 1 | 2072 | KP   |
| 2520 | No entry fees for locals                                                    | Governance  | 1 | 2067 | AP   |
| 2521 | No entry permit required for harvesters in some places                      | Governance  | 1 | 2074 | Ka   |
| 2522 | No impacts of rainfall and snowfall in caterpillar fungus production        | Information | 1 | 2072 | KP   |
| 2523 | No record keeping of trade volume of caterpillar fungus                     | Gap         | 1 | 2072 | KP   |
| 2524 | No standard price of caterpillar fungus determined by state                 | Gap         | 1 | 2072 | Nag  |

|      |                                                                                                        |            |   |      |      |
|------|--------------------------------------------------------------------------------------------------------|------------|---|------|------|
| 2525 | Non transparency on the revenue collected from caterpillar fungus                                      | Gap        | 1 | 2074 | Naya |
| 2526 | Non transparency on the revenue collected from caterpillar fungus                                      | Gap        | 1 | 2073 | Nag  |
| 2527 | Non transparent caterpillar fungus business transactions                                               | Gap        | 1 | 2070 | KP   |
| 2528 | Non transparent caterpillar fungus business transactions                                               | Gap        | 1 | 2075 | KP   |
| 2529 | Non transparent way of caterpillar fungus trade                                                        | Gap        | 1 | 2073 | Raj  |
| 2530 | Non-compliance of orders of authority by the collectors                                                | Gap        | 1 | 2071 | Nag  |
| 2531 | Non-compliance of orders of authority by the collectors                                                | Gap        | 1 | 2066 | KP   |
| 2532 | Non-systematic way of distributing permit                                                              | Gap        | 1 | 2077 | NAG  |
| 2533 | Non-systematic way of distributing permit                                                              | Gap        | 1 | 2077 | NAG  |
| 2534 | Non-systematic way of distributing permit                                                              | Gap        | 1 | 2077 | NAG  |
| 2535 | Non-transparent way of investing in the development work the income from caterpillar fungus entry fees | Gap        | 1 | 2073 | Nag  |
| 2536 | Non-uniformity in collecting revenue (entry fee)                                                       | Governance | 1 | 2074 | AP   |
| 2537 | Orders issued by the local authority management committee to abide by rules                            | Governance | 1 | 2067 | Nag  |
| 2538 | Orders issued by the local authority management committee to abide by rules                            | Governance | 1 | 2073 | Ka   |
| 2539 | Orders issued by the local authority management committee to abide by rules                            | Governance | 1 | 2070 | KP   |
| 2540 | Orders issued by the local authority management committee to abide by rules                            | Governance | 1 | 2071 | Nag  |
| 2541 | Orders issued by the local authority management committee to abide by rules                            | Governance | 1 | 2071 | Nag  |
| 2542 | Orders issued by the local authority management committee to abide by rules                            | Governance | 1 | 2075 | KP   |
| 2543 | Orders issued by the local authority management committee to abide by rules                            | Governance | 1 | 2075 | KP   |
| 2544 | Orders issued by the local authority management committee to abide by rules                            | Governance | 1 | 2075 | KP   |
| 2545 | Other herbs collection during the caterpillar fungus collection                                        | Impacts    | 1 | 2065 | AP   |
| 2546 | Other herbs collection during the caterpillar fungus collection                                        | Impacts    | 1 | 2065 | AP   |

|      |                                                                 |            |   |      |      |
|------|-----------------------------------------------------------------|------------|---|------|------|
| 2547 | Other herbs collection during the caterpillar fungus collection | Impacts    | 1 | 2071 | KP   |
| 2548 | Other herbs collection during the caterpillar fungus collection | Impacts    | 1 | 2074 | Ka   |
| 2549 | Other herbs collection during the caterpillar fungus collection | Impacts    | 1 | 2070 | AP   |
| 2550 | Other medicinal plant trade banned                              | Response   | 1 | 2070 | AP   |
| 2551 | Over crowded pastures                                           | Harvesting | 1 | 2070 | AP   |
| 2552 | Over crowded pastures                                           | Harvesting | 1 | 2071 | AP   |
| 2553 | Over crowded pastures                                           | Harvesting | 1 | 2074 | AP   |
| 2554 | Over crowded pastures                                           | Harvesting | 1 | 2074 | AP   |
| 2555 | Over crowded pastures                                           | Harvesting | 1 | 2074 | AP   |
| 2556 | Over crowded pastures                                           | Harvesting | 1 | 2071 | Raj  |
| 2557 | Over crowded pastures                                           | Harvesting | 1 | 2065 | Naya |
| 2558 | Over crowded pastures                                           | Harvesting | 1 | 2065 | KP   |
| 2559 | Over crowded pastures                                           | Harvesting | 1 | 2072 | KP   |
| 2560 | Over crowded pastures                                           | Harvesting | 1 | 2072 | KP   |
| 2561 | Over crowded pastures                                           | Harvesting | 1 | 2072 | KP   |
| 2562 | Over crowded pastures                                           | Harvesting | 1 | 2072 | KP   |
| 2563 | Over crowded pastures                                           | Harvesting | 1 | 2072 | KP   |
| 2564 | Over crowded pastures                                           | Harvesting | 1 | 2065 | GKP  |
| 2565 | Over crowded pastures                                           | Harvesting | 1 | 2066 | GKP  |
| 2566 | Over crowded pastures                                           | Harvesting | 1 | 2067 | GKP  |
| 2567 | Over crowded pastures                                           | Harvesting | 1 | 2067 | GKP  |
| 2568 | Over crowded pastures                                           | Harvesting | 1 | 2068 | GKP  |
| 2569 | Over crowded pastures                                           | Harvesting | 1 | 2070 | GKP  |
| 2570 | Over crowded pastures                                           | Harvesting | 1 | 2072 | GKP  |
| 2571 | Over crowded pastures                                           | Harvesting | 1 | 2073 | GKP  |
| 2572 | Over crowded pastures                                           | Harvesting | 1 | 2073 | GKP  |
| 2573 | Over crowded pastures                                           | Harvesting | 1 | 2065 | KP   |
| 2574 | Over crowded pastures                                           | Harvesting | 1 | 2065 | KP   |
| 2575 | Over crowded pastures                                           | Harvesting | 1 | 2066 | KP   |
| 2576 | Over crowded pastures                                           | Harvesting | 1 | 2068 | KP   |
| 2577 | Over crowded pastures                                           | Harvesting | 1 | 2068 | KP   |

|      |                       |            |   |      |     |
|------|-----------------------|------------|---|------|-----|
| 2578 | Over crowded pastures | Harvesting | 1 | 2068 | KP  |
| 2579 | Over crowded pastures | Harvesting | 1 | 2069 | KP  |
| 2580 | Over crowded pastures | Harvesting | 1 | 2069 | KP  |
| 2581 | Over crowded pastures | Harvesting | 1 | 2069 | KP  |
| 2582 | Over crowded pastures | Harvesting | 1 | 2070 | KP  |
| 2583 | Over crowded pastures | Harvesting | 1 | 2070 | KP  |
| 2584 | Over crowded pastures | Harvesting | 1 | 2070 | KP  |
| 2585 | Over crowded pastures | Harvesting | 1 | 2070 | KP  |
| 2586 | Over crowded pastures | Harvesting | 1 | 2071 | KP  |
| 2587 | Over crowded pastures | Harvesting | 1 | 2071 | KP  |
| 2588 | Over crowded pastures | Harvesting | 1 | 2071 | KP  |
| 2589 | Over crowded pastures | Harvesting | 1 | 2071 | KP  |
| 2590 | Over crowded pastures | Harvesting | 1 | 2071 | KP  |
| 2591 | Over crowded pastures | Harvesting | 1 | 2071 | KP  |
| 2592 | Over crowded pastures | Harvesting | 1 | 2071 | KP  |
| 2593 | Over crowded pastures | Harvesting | 1 | 2071 | KP  |
| 2594 | Over crowded pastures | Harvesting | 1 | 2072 | KP  |
| 2595 | Over crowded pastures | Harvesting | 1 | 2073 | KP  |
| 2596 | Over crowded pastures | Harvesting | 1 | 2073 | KP  |
| 2597 | Over crowded pastures | Harvesting | 1 | 2074 | KP  |
| 2598 | Over crowded pastures | Harvesting | 1 | 2074 | KP  |
| 2599 | Over crowded pastures | Harvesting | 1 | 2074 | KP  |
| 2600 | Over crowded pastures | Harvesting | 1 | 2074 | KP  |
| 2601 | Over crowded pastures | Harvesting | 1 | 2069 | Ka  |
| 2602 | Over crowded pastures | Harvesting | 1 | 2071 | Ka  |
| 2603 | Over crowded pastures | Harvesting | 1 | 2072 | Ka  |
| 2604 | Over crowded pastures | Harvesting | 1 | 2072 | Ka  |
| 2605 | Over crowded pastures | Harvesting | 1 | 2073 | Ka  |
| 2606 | Over crowded pastures | Harvesting | 1 | 2068 | Nag |
| 2607 | Over crowded pastures | Harvesting | 1 | 2069 | Nag |
| 2608 | Over crowded pastures | Harvesting | 1 | 2069 | Nag |

|      |                       |            |   |      |      |
|------|-----------------------|------------|---|------|------|
| 2609 | Over crowded pastures | Harvesting | 1 | 2070 | Nag  |
| 2610 | Over crowded pastures | Harvesting | 1 | 2070 | Nag  |
| 2611 | Over crowded pastures | Harvesting | 1 | 2071 | Nag  |
| 2612 | Over crowded pastures | Harvesting | 1 | 2071 | Nag  |
| 2613 | Over crowded pastures | Harvesting | 1 | 2071 | Nag  |
| 2614 | Over crowded pastures | Harvesting | 1 | 2071 | Nag  |
| 2615 | Over crowded pastures | Harvesting | 1 | 2071 | Nag  |
| 2616 | Over crowded pastures | Harvesting | 1 | 2071 | Nag  |
| 2617 | Over crowded pastures | Harvesting | 1 | 2071 | Nag  |
| 2618 | Over crowded pastures | Harvesting | 1 | 2073 | Nag  |
| 2619 | Over crowded pastures | Harvesting | 1 | 2073 | Nag  |
| 2620 | Over crowded pastures | Harvesting | 1 | 2065 | Raj  |
| 2621 | Over crowded pastures | Harvesting | 1 | 2065 | Raj  |
| 2622 | Over crowded pastures | Harvesting | 1 | 2066 | Raj  |
| 2623 | Over crowded pastures | Harvesting | 1 | 2066 | Raj  |
| 2624 | Over crowded pastures | Harvesting | 1 | 2066 | Raj  |
| 2625 | Over crowded pastures | Harvesting | 1 | 2066 | Raj  |
| 2626 | Over crowded pastures | Harvesting | 1 | 2067 | Raj  |
| 2627 | Over crowded pastures | Harvesting | 1 | 2068 | Raj  |
| 2628 | Over crowded pastures | Harvesting | 1 | 2068 | Raj  |
| 2629 | Over crowded pastures | Harvesting | 1 | 2068 | Raj  |
| 2630 | Over crowded pastures | Harvesting | 1 | 2068 | Raj  |
| 2631 | Over crowded pastures | Harvesting | 1 | 2070 | Raj  |
| 2632 | Over crowded pastures | Harvesting | 1 | 2070 | Raj  |
| 2633 | Over crowded pastures | Harvesting | 1 | 2071 | Raj  |
| 2634 | Over crowded pastures | Harvesting | 1 | 2066 | Naya |
| 2635 | Over crowded pastures | Harvesting | 1 | 2067 | Naya |
| 2636 | Over crowded pastures | Harvesting | 1 | 2067 | Naya |
| 2637 | Over crowded pastures | Harvesting | 1 | 2067 | Naya |
| 2638 | Over crowded pastures | Harvesting | 1 | 2069 | Naya |
| 2639 | Over crowded pastures | Harvesting | 1 | 2070 | Naya |

|      |                       |            |   |      |      |
|------|-----------------------|------------|---|------|------|
| 2640 | Over crowded pastures | Harvesting | 1 | 2072 | Naya |
| 2641 | Over crowded pastures | Harvesting | 1 | 2072 | Naya |
| 2642 | Over crowded pastures | Harvesting | 1 | 2072 | Naya |
| 2643 | Over crowded pastures | Harvesting | 1 | 2072 | Naya |
| 2644 | Over crowded pastures | Harvesting | 1 | 2073 | Naya |
| 2645 | Over crowded pastures | Harvesting | 1 | 2074 | Naya |
| 2646 | Over crowded pastures | Harvesting | 1 | 2069 | Naya |
| 2647 | Over crowded pastures | Harvesting | 1 | 2069 | Naya |
| 2648 | Over crowded pastures | Harvesting | 1 | 2069 | Naya |
| 2649 | Over crowded pastures | Harvesting | 1 | 2065 | KP   |
| 2650 | Over crowded pastures | Harvesting | 1 | 2072 | Nag  |
| 2651 | Over crowded pastures | Harvesting | 1 | 2073 | Raj  |
| 2652 | Over crowded pastures | Harvesting | 1 | 2073 | Raj  |
| 2653 | Over crowded pastures | Harvesting | 1 | 2065 | AP   |
| 2654 | Over crowded pastures | Harvesting | 1 | 2065 | AP   |
| 2655 | Over crowded pastures | Harvesting | 1 | 2068 | Nag  |
| 2656 | Over crowded pastures | Harvesting | 1 | 2068 | GKP  |
| 2657 | Over crowded pastures | Harvesting | 1 | 2071 | Nag  |
| 2658 | Over crowded pastures | Harvesting | 1 | 2072 | GKP  |
| 2659 | Over crowded pastures | Harvesting | 1 | 2071 | Nag  |
| 2660 | Over crowded pastures | Harvesting | 1 | 2071 | Nag  |
| 2661 | Over crowded pastures | Harvesting | 1 | 2076 | KP   |
| 2662 | Over crowded pastures | Harvesting | 1 | 2078 | Nag  |
| 2663 | Over crowded pastures | Harvesting | 1 | 2077 | Nag  |
| 2664 | Over crowded pastures | Harvesting | 1 | 2078 | KP   |
| 2665 | Over crowded pastures | Harvesting | 1 | 2078 | KP   |
| 2666 | Over crowded pastures | Harvesting | 1 | 2076 | Naya |
| 2667 | Over crowded pastures | Harvesting | 1 | 2074 | RAJ  |
| 2668 | Over crowded pastures | Harvesting | 1 | 2067 | Ka   |
| 2669 | Over crowded pastures | Harvesting | 1 | 2078 | Ka   |
| 2670 | Over crowded pastures | Harvesting | 1 | 2075 | KP   |



|      |                                                            |            |   |      |     |
|------|------------------------------------------------------------|------------|---|------|-----|
| 2671 | Over crowded pastures                                      | Harvesting | 1 | 2075 | KP  |
| 2672 | Over crowded pastures                                      | Harvesting | 1 | 2075 | KP  |
| 2673 | Over crowded pastures                                      | Harvesting | 1 | 2075 | KP  |
| 2674 | Over crowded pastures                                      | Harvesting | 1 | 2075 | KP  |
| 2675 | Over crowded pastures                                      | Harvesting | 1 | 2075 | KP  |
| 2676 | Over crowded pastures                                      | Harvesting | 1 | 2075 | KP  |
| 2677 | Over crowded pastures                                      | Harvesting | 1 | 2075 | KP  |
| 2678 | Over crowded pastures                                      | Harvesting | 1 | 2075 | KP  |
| 1664 | Over crowded pastures (Harvesters from outside districts)  | Harvesting | 1 | 2072 | Raj |
| 1665 | Over crowded pastures (Harvesters from outside districts)  | Harvesting | 1 | 2069 | KP  |
| 1666 | Over crowded pastures (Harvesters from outside districts)  | Harvesting | 1 | 2072 | KP  |
| 1667 | Over crowded pastures (Harvesters from outside districts)  | Harvesting | 1 | 2065 | GKP |
| 1668 | Over crowded pastures (Harvesters from outside districts)  | Harvesting | 1 | 2074 | KP  |
| 1669 | Over crowded pastures (Harvesters from outside districts)  | Harvesting | 1 | 2072 | KP  |
| 1670 | Over crowded pastures (Harvesters from outside districts)  | Harvesting | 1 | 2072 | KP  |
| 1671 | Over crowded pastures (Harvesters from outside districts)  | Harvesting | 1 | 2066 | Raj |
| 2679 | Overharvesting of caterpillar fungus                       | Impacts    | 1 | 2074 | Ka  |
| 2680 | Overharvesting of caterpillar fungus                       | Impacts    | 1 | 2068 | KP  |
| 2681 | Overharvesting of caterpillar fungus                       | Impacts    | 1 | 2070 | GKP |
| 2682 | Overharvesting of caterpillar fungus                       | Impacts    | 1 | 2073 | Nag |
| 2683 | Overharvesting of caterpillar fungus                       | Impacts    | 1 | 2075 | KP  |
| 2684 | Overharvesting of caterpillar fungus (verge of extinction) | Impacts    | 1 | 2065 | Raj |
| 2685 | Parents ignoring children schooling                        | Impacts    | 1 | 2071 | KP  |
| 2686 | Parents ignoring children schooling                        | Impacts    | 1 | 2071 | KP  |
| 2687 | Parents ignoring children schooling                        | Impacts    | 1 | 2072 | KP  |
| 2688 | Parents ignoring children schooling                        | Impacts    | 1 | 2073 | Nag |
| 2689 | Parents ignoring children schooling                        | Impacts    | 1 | 2072 | KP  |
| 2690 | Parents ignoring children schooling                        | Impacts    | 1 | 2075 | KP  |
| 2691 | Parents ignoring children schooling                        | Impacts    | 1 | 2075 | KP  |
| 2692 | Parents ignoring children schooling                        | Impacts    | 1 | 2075 | KP  |
| 2693 | Parents ignoring children schooling                        | Impacts    | 1 | 2075 | KP  |

|      |                                                                            |            |   |      |      |
|------|----------------------------------------------------------------------------|------------|---|------|------|
| 2694 | Parents ignoring children schooling                                        | Impacts    | 1 | 2075 | KP   |
| 2695 | Parents ignoring children schooling                                        | Impacts    | 1 | 2075 | KP   |
| 2696 | Parents ignoring children schooling                                        | Impacts    | 1 | 2075 | KP   |
| 2697 | Parents ignoring children schooling                                        | Impacts    | 1 | 2075 | KP   |
| 2698 | Parents ignoring children schooling                                        | Impacts    | 1 | 2075 | KP   |
| 2699 | Parents ignoring children schooling                                        | Impacts    | 1 | 2075 | KP   |
| 2700 | Parents ignoring children schooling                                        | Impacts    | 1 | 2075 | KP   |
| 2701 | Parents ignoring children schooling                                        | Impacts    | 1 | 2075 | KP   |
| 2702 | Parents ignoring children schooling                                        | Impacts    | 1 | 2075 | KP   |
| 2703 | Parents ignoring children schooling                                        | Impacts    | 1 | 2075 | KP   |
| 2704 | Parents ignoring children schooling                                        | Impacts    | 1 | 2075 | KP   |
| 2705 | Parents ignoring children schooling                                        | Impacts    | 1 | 2075 | KP   |
| 2706 | Parents ignoring children schooling                                        | Impacts    | 1 | 2075 | KP   |
| 2707 | Parents ignoring children schooling                                        | Impacts    | 1 | 2075 | KP   |
| 2708 | Parents ignoring children schooling                                        | Impacts    | 1 | 2075 | KP   |
| 2709 | Park authorities requests to possess collection permit with the harvesters | Governance | 1 | 2072 | Naya |
| 2710 | Park authorities requests to possess collection permit with the harvesters | Governance | 1 | 2074 | Naya |
| 2711 | Park authorities requests to possess collection permit with the harvesters | Governance | 1 | 2078 | Naya |
| 2712 | Per capita income from caterpillar fungus trade                            | Trade      | 1 | 2072 | Naya |
| 2713 | Per capita income from caterpillar fungus trade                            | Trade      | 1 | 2073 | Nag  |
| 2714 | Per capita income from caterpillar fungus trade                            | Trade      | 1 | 2069 | Naya |
| 2715 | Per capita income from caterpillar fungus trade                            | Trade      | 1 | 2068 | Raj  |
| 2716 | Per capita income from caterpillar fungus trade                            | Trade      | 1 | 2069 | Raj  |
| 2717 | Per capita income from caterpillar fungus trade                            | Trade      | 1 | 2068 | Raj  |
| 2718 | Per capita income from caterpillar fungus trade                            | Trade      | 1 | 2069 | Nag  |
| 2719 | Per capita income from caterpillar fungus trade                            | Trade      | 1 | 2069 | Nag  |
| 2720 | Per capita income from caterpillar fungus trade                            | Trade      | 1 | 2069 | Nag  |
| 2721 | Per capita income from caterpillar fungus trade                            | Trade      | 1 | 2070 | Nag  |

|      |                                                                                        |             |   |      |     |
|------|----------------------------------------------------------------------------------------|-------------|---|------|-----|
| 2722 | Per capita income from caterpillar fungus trade                                        | Trade       | 1 | 2072 | KP  |
| 2723 | Per capita income from caterpillar fungus trade                                        | Trade       | 1 | 2075 | KP  |
| 2724 | Per capita income of the caterpillar fungus                                            | Impacts     | 1 | 2072 | Nag |
| 2725 | Per capita income of the caterpillar fungus                                            | Impacts     | 1 | 2066 | Nag |
| 2726 | Per capita income of the caterpillar fungus                                            | Impacts     | 1 | 2072 | Ka  |
| 2727 | Per capita income of the caterpillar fungus                                            | Impacts     | 1 | 2073 | Raj |
| 2728 | Per capita income of the caterpillar fungus                                            | Impacts     | 1 | 2069 | Nag |
| 2729 | Per capita income of the caterpillar fungus                                            | Impacts     | 1 | 2065 | AP  |
| 2730 | Per capita income of the caterpillar fungus                                            | Impacts     | 1 | 2071 | KP  |
| 2731 | Per capita income of the caterpillar fungus                                            | Impacts     | 1 | 2074 | KP  |
| 2732 | Per capita income of the caterpillar fungus (decreasing)                               | Impacts     | 1 | 2074 | KP  |
| 2733 | Per day income around 10 thousand in the pasture                                       | Harvesting  | 1 | 2074 | AP  |
| 2734 | Permission to harvest caterpillar fungus in new pastures                               | Governance  | 1 | 2070 | KP  |
| 2735 | Possibilities of International trade of caterpillar fungus adhering to WHO regulations | Trade       | 1 | 2071 | Ka  |
| 2736 | Poverty in the mountain regions                                                        | Information | 1 | 2065 | KP  |
| 2737 | Poverty in the mountain regions                                                        | Information | 1 | 2071 | KP  |
| 2738 | Poverty in the mountain regions                                                        | Information | 1 | 2066 | AP  |
| 2739 | Poverty in the mountain regions                                                        | Information | 1 | 2069 | AP  |
| 2740 | Poverty in the mountain regions                                                        | Information | 1 | 2072 | AP  |
| 2741 | Poverty in the mountain regions                                                        | Information | 1 | 2072 | AP  |
| 2742 | Poverty in the mountain regions                                                        | Information | 1 | 2071 | AP  |
| 2743 | Poverty in the mountain regions                                                        | Information | 1 | 2069 | KP  |
| 2744 | Poverty in the mountain regions                                                        | Information | 1 | 2075 | KP  |
| 2745 | Poverty in the mountain regions                                                        | Information | 1 | 2075 | KP  |
| 2746 | Poverty in the mountain regions                                                        | Information | 1 | 2075 | KP  |
| 2747 | Poverty in the mountain regions                                                        | Information | 1 | 2075 | KP  |
| 2748 | Poverty in the mountain regions                                                        | Information | 1 | 2075 | KP  |
| 2749 | Poverty in the mountain regions                                                        | Information | 1 | 2075 | KP  |
| 2750 | Poverty in the mountain regions                                                        | Information | 1 | 2075 | KP  |
| 2751 | Poverty in the mountain regions                                                        | Information | 1 | 2075 | KP  |

|      |                                 |             |   |      |      |
|------|---------------------------------|-------------|---|------|------|
| 2752 | Poverty in the mountain regions | Information | 1 | 2075 | KP   |
| 2753 | Poverty in the mountain regions | Information | 1 | 2075 | KP   |
| 2754 | Poverty in the mountain regions | Information | 1 | 2075 | KP   |
| 2755 | Poverty in the mountain regions | Information | 1 | 2075 | KP   |
| 2756 | Poverty in the mountain regions | Information | 1 | 2075 | KP   |
| 2757 | Poverty in the mountain regions | Information | 1 | 2075 | KP   |
| 2758 | Poverty in the mountain regions | Information | 1 | 2075 | KP   |
| 2759 | Poverty in the mountain regions | Information | 1 | 2075 | KP   |
| 2760 | Poverty in the mountain regions | Information | 1 | 2075 | KP   |
| 2761 | Poverty in the mountain regions | Information | 1 | 2075 | KP   |
| 2762 | Poverty in the mountain regions | Information | 1 | 2076 | KP   |
| 2763 | Poverty in the mountain regions | Information | 1 | 2076 | KP   |
| 2764 | Poverty in the mountain regions | Information | 1 | 2078 | Naya |
| 2765 | Poverty in the mountain regions | Information | 1 | 2078 | KP   |
| 2766 | Poverty in the mountain regions | Information | 1 | 2078 | KP   |
| 2767 | Poverty in the mountain regions | Information | 1 | 2078 | KP   |
| 2768 | Poverty in the mountain regions | Information | 1 | 2074 | Naya |
| 2769 | Poverty in the mountain regions | Information | 1 | 2074 | Naya |
| 2770 | Poverty in the mountain regions | Information | 1 | 2076 | Naya |
| 2771 | Poverty in the mountain regions | Information | 1 | 2078 | Naya |
| 2772 | Poverty in the mountain regions | Information | 1 | 2077 | RAJ  |
| 2773 | Poverty in the mountain regions | Information | 1 | 2078 | RAJ  |
| 2774 | Poverty in the mountain regions | Information | 1 | 2078 | RAJ  |
| 2775 | Poverty in the mountain regions | Information | 1 | 2067 | Ka   |
| 2776 | Poverty in the mountain regions | Information | 1 | 2068 | Ka   |
| 2777 | Poverty in the mountain regions | Information | 1 | 2076 | Ka   |
| 2778 | Poverty in the mountain regions | Information | 1 | 2077 | Ka   |
| 2779 | Poverty in the mountain regions | Information | 1 | 2077 | Ka   |
| 2780 | Poverty in the mountain regions | Information | 1 | 2076 | Naya |
| 2781 | Poverty in the mountain regions | Information | 1 | 2078 | Naya |
| 2782 | Poverty in the mountain regions | Information | 1 | 2078 | Naya |

|      |                                                                        |             |   |      |      |
|------|------------------------------------------------------------------------|-------------|---|------|------|
| 2783 | Poverty in the mountain regions                                        | Information | 1 | 2078 | Naya |
| 2784 | Poverty in the mountain regions                                        | Information | 1 | 2078 | Naya |
| 2785 | Price difference of caterpillar fungus as per size                     | Trade       | 1 | 2068 | KP   |
| 2786 | Price difference of caterpillar fungus as per size                     | Trade       | 1 | 2076 | KP   |
| 2787 | Price fluctuation of caterpillar fungus each year                      | Trade       | 1 | 2073 | Nag  |
| 2788 | Price fluctuation of caterpillar fungus each year                      | Trade       | 1 | 2068 | Raj  |
| 2789 | Price fluctuation of caterpillar fungus each year                      | Trade       | 1 | 2067 | Naya |
| 2790 | Price fluctuation of caterpillar fungus each year                      | Trade       | 1 | 2070 | Naya |
| 2791 | Price of caterpillar fungus per piece, kg, and in international market | Trade       | 1 | 2070 | Naya |
| 2792 | Price of caterpillar fungus per piece, kg, and in international market | Trade       | 1 | 2065 | Raj  |
| 2793 | Price of caterpillar fungus per piece, kg, and in international market | Trade       | 1 | 2068 | GKP  |
| 2794 | Price of caterpillar fungus per piece, kg, and in international market | Trade       | 1 | 2071 | Nag  |
| 2795 | Price of caterpillar fungus per piece, kg, and in international market | Trade       | 1 | 2065 | AP   |
| 2796 | Price of caterpillar fungus per piece, kg, and in international market | Trade       | 1 | 2068 | Nag  |
| 2797 | Price of caterpillar fungus per piece, kg, and in international market | Trade       | 1 | 2068 | Nag  |
| 2798 | Price of caterpillar fungus per piece, kg, and in international market | Trade       | 1 | 2066 | Naya |
| 2799 | Price of caterpillar fungus per piece, kg, and in international market | Trade       | 1 | 2070 | Nag  |
| 2800 | Price of caterpillar fungus per piece, kg, and in international market | Trade       | 1 | 2065 | AP   |
| 2801 | Price of caterpillar fungus per piece, kg, and in international market | Trade       | 1 | 2066 | Naya |
| 2802 | Price of caterpillar fungus per piece, kg, and in international market | Trade       | 1 | 2071 | KP   |
| 2803 | Price of caterpillar fungus per piece, kg, and in international market | Trade       | 1 | 2070 | KP   |
| 2804 | Price of caterpillar fungus per piece, kg, and in international market | Trade       | 1 | 2070 | KP   |
| 2805 | Price of caterpillar fungus per piece, kg, and in international market | Trade       | 1 | 2070 | KP   |
| 2806 | Price of caterpillar fungus per piece, kg, and in international market | Trade       | 1 | 2065 | AP   |
| 2807 | Price of caterpillar fungus per piece, kg, and in international market | Trade       | 1 | 2065 | AP   |
| 2808 | Price of caterpillar fungus per piece, kg, and in international market | Trade       | 1 | 2068 | Naya |
| 2809 | Price of caterpillar fungus per piece, kg, and in international market | Trade       | 1 | 2070 | Naya |
| 2810 | Price of caterpillar fungus per piece, kg, and in international market | Trade       | 1 | 2070 | Naya |
| 2811 | Price of caterpillar fungus per piece, kg, and in international market | Trade       | 1 | 2074 | Naya |
| 2812 | Price of caterpillar fungus per piece, kg, and in international market | Trade       | 1 | 2070 | GKP  |
| 2813 | Price of caterpillar fungus per piece, kg, and in international market | Trade       | 1 | 2065 | AP   |

|      |                                                                        |       |   |      |      |
|------|------------------------------------------------------------------------|-------|---|------|------|
| 2814 | Price of caterpillar fungus per piece, kg, and in international market | Trade | 1 | 2070 | KP   |
| 2815 | Price of caterpillar fungus per piece, kg, and in international market | Trade | 1 | 2074 | GKP  |
| 2816 | Price of caterpillar fungus per piece, kg, and in international market | Trade | 1 | 2068 | Naya |
| 2817 | Price of caterpillar fungus per piece, kg, and in international market | Trade | 1 | 2065 | Raj  |
| 2818 | Price of caterpillar fungus per piece, kg, and in international market | Trade | 1 | 2069 | Naya |
| 2819 | Price of caterpillar fungus per piece, kg, and in international market | Trade | 1 | 2069 | Naya |
| 2820 | Price of caterpillar fungus per piece, kg, and in international market | Trade | 1 | 2069 | Naya |
| 2821 | Price of caterpillar fungus per piece, kg, and in international market | Trade | 1 | 2066 | Raj  |
| 2822 | Price of caterpillar fungus per piece, kg, and in international market | Trade | 1 | 2067 | Raj  |
| 2823 | Price of caterpillar fungus per piece, kg, and in international market | Trade | 1 | 2068 | Raj  |
| 2824 | Price of caterpillar fungus per piece, kg, and in international market | Trade | 1 | 2068 | Raj  |
| 2825 | Price of caterpillar fungus per piece, kg, and in international market | Trade | 1 | 2068 | Raj  |
| 2826 | Price of caterpillar fungus per piece, kg, and in international market | Trade | 1 | 2069 | Raj  |
| 2827 | Price of caterpillar fungus per piece, kg, and in international market | Trade | 1 | 2069 | Raj  |
| 2828 | Price of caterpillar fungus per piece, kg, and in international market | Trade | 1 | 2069 | Raj  |
| 2829 | Price of caterpillar fungus per piece, kg, and in international market | Trade | 1 | 2067 | Naya |
| 2830 | Price of caterpillar fungus per piece, kg, and in international market | Trade | 1 | 2073 | Naya |
| 2831 | Price of caterpillar fungus per piece, kg, and in international market | Trade | 1 | 2074 | Naya |
| 2832 | Price of caterpillar fungus per piece, kg, and in international market | Trade | 1 | 2073 | Naya |
| 2833 | Price of caterpillar fungus per piece, kg, and in international market | Trade | 1 | 2072 | AP   |
| 2834 | Price of caterpillar fungus per piece, kg, and in international market | Trade | 1 | 2066 | AP   |
| 2835 | Price of caterpillar fungus per piece, kg, and in international market | Trade | 1 | 2066 | AP   |
| 2836 | Price of caterpillar fungus per piece, kg, and in international market | Trade | 1 | 2067 | AP   |
| 2837 | Price of caterpillar fungus per piece, kg, and in international market | Trade | 1 | 2069 | AP   |
| 2838 | Price of caterpillar fungus per piece, kg, and in international market | Trade | 1 | 2069 | AP   |
| 2839 | Price of caterpillar fungus per piece, kg, and in international market | Trade | 1 | 2070 | AP   |
| 2840 | Price of caterpillar fungus per piece, kg, and in international market | Trade | 1 | 2073 | AP   |
| 2841 | Price of caterpillar fungus per piece, kg, and in international market | Trade | 1 | 2072 | KP   |
| 2842 | Price of caterpillar fungus per piece, kg, and in international market | Trade | 1 | 2065 | Naya |
| 2843 | Price of caterpillar fungus per piece, kg, and in international market | Trade | 1 | 2071 | KP   |
| 2844 | Price of caterpillar fungus per piece, kg, and in international market | Trade | 1 | 2070 | Naya |

|      |                                                                        |       |   |      |      |
|------|------------------------------------------------------------------------|-------|---|------|------|
| 2845 | Price of caterpillar fungus per piece, kg, and in international market | Trade | 1 | 2074 | Naya |
| 2846 | Price of caterpillar fungus per piece, kg, and in international market | Trade | 1 | 2073 | AP   |
| 2847 | Price of caterpillar fungus per piece, kg, and in international market | Trade | 1 | 2069 | Ka   |
| 2848 | Price of caterpillar fungus per piece, kg, and in international market | Trade | 1 | 2071 | Raj  |
| 2849 | Price of caterpillar fungus per piece, kg, and in international market | Trade | 1 | 2071 | Raj  |
| 2850 | Price of caterpillar fungus per piece, kg, and in international market | Trade | 1 | 2065 | Raj  |
| 2851 | Price of caterpillar fungus per piece, kg, and in international market | Trade | 1 | 2066 | Raj  |
| 2852 | Price of caterpillar fungus per piece, kg, and in international market | Trade | 1 | 2066 | Raj  |
| 2853 | Price of caterpillar fungus per piece, kg, and in international market | Trade | 1 | 2066 | Raj  |
| 2854 | Price of caterpillar fungus per piece, kg, and in international market | Trade | 1 | 2068 | Raj  |
| 2855 | Price of caterpillar fungus per piece, kg, and in international market | Trade | 1 | 2069 | Raj  |
| 2856 | Price of caterpillar fungus per piece, kg, and in international market | Trade | 1 | 2069 | Naya |
| 2857 | Price of caterpillar fungus per piece, kg, and in international market | Trade | 1 | 2069 | Naya |
| 2858 | Price of caterpillar fungus per piece, kg, and in international market | Trade | 1 | 2069 | Naya |
| 2859 | Price of caterpillar fungus per piece, kg, and in international market | Trade | 1 | 2069 | Naya |
| 2860 | Price of caterpillar fungus per piece, kg, and in international market | Trade | 1 | 2069 | Naya |
| 2861 | Price of caterpillar fungus per piece, kg, and in international market | Trade | 1 | 2070 | Naya |
| 2862 | Price of caterpillar fungus per piece, kg, and in international market | Trade | 1 | 2070 | Naya |
| 2863 | Price of caterpillar fungus per piece, kg, and in international market | Trade | 1 | 2070 | Naya |
| 2864 | Price of caterpillar fungus per piece, kg, and in international market | Trade | 1 | 2073 | Naya |
| 2865 | Price of caterpillar fungus per piece, kg, and in international market | Trade | 1 | 2074 | GKP  |
| 2866 | Price of caterpillar fungus per piece, kg, and in international market | Trade | 1 | 2065 | Raj  |
| 2867 | Price of caterpillar fungus per piece, kg, and in international market | Trade | 1 | 2065 | AP   |
| 2868 | Price of caterpillar fungus per piece, kg, and in international market | Trade | 1 | 2072 | KP   |
| 2869 | Price of caterpillar fungus per piece, kg, and in international market | Trade | 1 | 2073 | Naya |
| 2870 | Price of caterpillar fungus per piece, kg, and in international market | Trade | 1 | 2069 | GKP  |
| 2871 | Price of caterpillar fungus per piece, kg, and in international market | Trade | 1 | 2069 | KP   |
| 2872 | Price of caterpillar fungus per piece, kg, and in international market | Trade | 1 | 2069 | KP   |
| 2873 | Price of caterpillar fungus per piece, kg, and in international market | Trade | 1 | 2071 | KP   |
| 2874 | Price of caterpillar fungus per piece, kg, and in international market | Trade | 1 | 2070 | KP   |
| 2875 | Price of caterpillar fungus per piece, kg, and in international market | Trade | 1 | 2066 | KP   |

|      |                                                                        |       |   |      |     |
|------|------------------------------------------------------------------------|-------|---|------|-----|
| 2876 | Price of caterpillar fungus per piece, kg, and in international market | Trade | 1 | 2072 | KP  |
| 2877 | Price of caterpillar fungus per piece, kg, and in international market | Trade | 1 | 2067 | Nag |
| 2878 | Price of caterpillar fungus per piece, kg, and in international market | Trade | 1 | 2067 | Nag |
| 2879 | Price of caterpillar fungus per piece, kg, and in international market | Trade | 1 | 2067 | Nag |
| 2880 | Price of caterpillar fungus per piece, kg, and in international market | Trade | 1 | 2068 | Nag |
| 2881 | Price of caterpillar fungus per piece, kg, and in international market | Trade | 1 | 2068 | Nag |
| 2882 | Price of caterpillar fungus per piece, kg, and in international market | Trade | 1 | 2069 | Nag |
| 2883 | Price of caterpillar fungus per piece, kg, and in international market | Trade | 1 | 2071 | Nag |
| 2884 | Price of caterpillar fungus per piece, kg, and in international market | Trade | 1 | 2071 | Nag |
| 2885 | Price of caterpillar fungus per piece, kg, and in international market | Trade | 1 | 2073 | Nag |
| 2886 | Price of caterpillar fungus per piece, kg, and in international market | Trade | 1 | 2073 | Nag |
| 2887 | Price of caterpillar fungus per piece, kg, and in international market | Trade | 1 | 2071 | KP  |
| 2888 | Price of caterpillar fungus per piece, kg, and in international market | Trade | 1 | 2070 | KP  |
| 2889 | Price of caterpillar fungus per piece, kg, and in international market | Trade | 1 | 2068 | KP  |
| 2890 | Price of caterpillar fungus per piece, kg, and in international market | Trade | 1 | 2068 | KP  |
| 2891 | Price of caterpillar fungus per piece, kg, and in international market | Trade | 1 | 2070 | KP  |
| 2892 | Price of caterpillar fungus per piece, kg, and in international market | Trade | 1 | 2071 | KP  |
| 2893 | Price of caterpillar fungus per piece, kg, and in international market | Trade | 1 | 2071 | KP  |
| 2894 | Price of caterpillar fungus per piece, kg, and in international market | Trade | 1 | 2071 | KP  |
| 2895 | Price of caterpillar fungus per piece, kg, and in international market | Trade | 1 | 2074 | KP  |
| 2896 | Price of caterpillar fungus per piece, kg, and in international market | Trade | 1 | 2074 | KP  |
| 2897 | Price of caterpillar fungus per piece, kg, and in international market | Trade | 1 | 2074 | KP  |
| 2898 | Price of caterpillar fungus per piece, kg, and in international market | Trade | 1 | 2072 | KP  |
| 2899 | Price of caterpillar fungus per piece, kg, and in international market | Trade | 1 | 2072 | KP  |
| 2900 | Price of caterpillar fungus per piece, kg, and in international market | Trade | 1 | 2069 | KP  |
| 2901 | Price of caterpillar fungus per piece, kg, and in international market | Trade | 1 | 2072 | KP  |
| 2902 | Price of caterpillar fungus per piece, kg, and in international market | Trade | 1 | 2069 | KP  |
| 2903 | Price of caterpillar fungus per piece, kg, and in international market | Trade | 1 | 2069 | KP  |
| 2904 | Price of caterpillar fungus per piece, kg, and in international market | Trade | 1 | 2069 | Nag |
| 2905 | Price of caterpillar fungus per piece, kg, and in international market | Trade | 1 | 2071 | Nag |
| 2906 | Price of caterpillar fungus per piece, kg, and in international market | Trade | 1 | 2067 | Nag |





|      |                                                                        |             |   |      |     |
|------|------------------------------------------------------------------------|-------------|---|------|-----|
| 2938 | Price of caterpillar fungus per piece, kg, and in international market | Trade       | 1 | 2071 | Ka  |
| 2939 | Price of caterpillar fungus per piece, kg, and in international market | Trade       | 1 | 2071 | Nag |
| 2940 | Price of caterpillar fungus per piece, kg, and in international market | Trade       | 1 | 2071 | Nag |
| 2941 | Price of caterpillar fungus per piece, kg, and in international market | Trade       | 1 | 2073 | Nag |
| 2942 | Price of caterpillar fungus per piece, kg, and in international market | Trade       | 1 | 2073 | Nag |
| 2943 | Price of caterpillar fungus per piece, kg, and in international market | Trade       | 1 | 2074 | Nag |
| 2944 | Price of caterpillar fungus per piece, kg, and in international market | Trade       | 1 | 2070 | KP  |
| 2945 | Price of caterpillar fungus per piece, kg, and in international market | Trade       | 1 | 2071 | KP  |
| 2946 | Price of caterpillar fungus per piece, kg, and in international market | Trade       | 1 | 2070 | KP  |
| 2947 | Price of caterpillar fungus per piece, kg, and in international market | Trade       | 1 | 2071 | Ka  |
| 2948 | Price of caterpillar fungus per piece, kg, and in international market | Trade       | 1 | 2070 | Ka  |
| 2949 | Price of caterpillar fungus per piece, kg, and in international market | Trade       | 1 | 2069 | KP  |
| 2950 | Price of caterpillar fungus per piece, kg, and in international market | Trade       | 1 | 2076 | KP  |
| 2951 | Price of caterpillar fungus per piece, kg, and in international market | Trade       | 1 | 2076 | KP  |
| 2952 | Price of caterpillar fungus per piece, kg, and in international market | Trade       | 1 | 2076 | KP  |
| 2953 | Price of caterpillar fungus per piece, kg, and in international market | Trade       | 1 | 2076 | AP  |
| 2954 | Price of caterpillar fungus reported                                   | Trade       | 1 | 2076 | AP  |
| 2955 | Price of caterpillar fungus reported                                   | Trade       | 1 | 2076 | AP  |
| 2956 | Price of caterpillar fungus reported                                   | Trade       | 1 | 2067 | Ka  |
| 2957 | Price of caterpillar fungus varies as per the pasture                  | Trade       | 1 | 2070 | Nag |
| 2958 | Price of caterpillar fungus varies as per the pasture                  | Trade       | 1 | 2074 | Ka  |
| 2959 | Price of caterpillar fungus varies as per the pasture                  | Trade       | 1 | 2076 | KP  |
| 2960 | Price of caterpillar fungus varies as per the pasture                  | Trade       | 1 | 2076 | KP  |
| 2961 | Price per kg of caterpillar fungus                                     | Trade       | 1 | 2068 | Raj |
| 2962 | Price per kg of caterpillar fungus (low in India than Nepal)           | Trade       | 1 | 2066 | Raj |
| 2963 | Pristine firewood used for cooking purpose in the pastures             | Impacts     | 1 | 2069 | KP  |
| 2964 | Productivity of caterpillar fungus                                     | Information | 1 | 2068 | Raj |
| 2965 | Productivity of caterpillar fungus                                     | Information | 1 | 2070 | KP  |
| 2966 | Productivity of the pastures reported                                  | Information | 1 | 2070 | KP  |
| 2967 | Provision of identity cards for harvesters                             | Governance  | 1 | 2069 | KP  |
| 2968 | Provision of identity cards for harvesters                             | Governance  | 1 | 2074 | KP  |

|      |                                                                                   |             |   |      |      |
|------|-----------------------------------------------------------------------------------|-------------|---|------|------|
| 2969 | Provision of identity cards for harvesters                                        | Governance  | 1 | 2074 | KP   |
| 2970 | Provision of identity cards for harvesters                                        | Governance  | 1 | 2071 | KP   |
| 2971 | Provision of identity cards for harvesters                                        | Governance  | 1 | 2065 | AP   |
| 2972 | Provision of identity cards for harvesters                                        | Governance  | 1 | 2072 | AP   |
| 2973 | Provision of identity cards for harvesters                                        | Governance  | 1 | 2074 | AP   |
| 2974 | Provision of identity cards for harvesters                                        | Governance  | 1 | 2074 | AP   |
| 2975 | Provision of identity cards for harvesters                                        | Governance  | 1 | 2074 | AP   |
| 2976 | Provision of identity cards for harvesters                                        | Governance  | 1 | 2065 | Naya |
| 2977 | Provision of identity cards for harvesters                                        | Governance  | 1 | 2074 | Naya |
| 2978 | Provision of identity cards for harvesters                                        | Governance  | 1 | 2074 | Naya |
| 2979 | Provision of identity cards for harvesters                                        | Governance  | 1 | 2073 | Nag  |
| 2980 | Provision of identity cards for harvesters                                        | Governance  | 1 | 2065 | GKP  |
| 2981 | Provision of identity cards for harvesters                                        | Governance  | 1 | 2071 | KP   |
| 2982 | Provision of identity cards for harvesters                                        | Governance  | 1 | 2072 | KP   |
| 2983 | Provision of identity cards for harvesters                                        | Governance  | 1 | 2072 | KP   |
| 2984 | Provision of identity cards for harvesters                                        | Governance  | 1 | 2073 | GKP  |
| 2985 | Provision of identity cards for harvesters                                        | Governance  | 1 | 2074 | GKP  |
| 2986 | Provision of identity cards for harvesters                                        | Governance  | 1 | 2074 | AP   |
| 2987 | Provision of identity cards for harvesters                                        | Governance  | 1 | 2076 | KP   |
| 2988 | Provision of identity cards for harvesters                                        | Governance  | 1 | 2076 | KP   |
| 2989 | Provision of identity cards for harvesters                                        | Governance  | 1 | 2076 | KP   |
| 2990 | Provision of identity cards for harvesters                                        | Governance  | 1 | 2076 | KP   |
| 2991 | Quality testing of caterpillar fungus                                             | Information | 1 | 2073 | Nag  |
| 2992 | Quality testing of caterpillar fungus found in low altitude                       | Information | 1 | 2065 | AP   |
| 2993 | Quality testing of caterpillar fungus found in low altitude                       | Information | 1 | 2065 | AP   |
| 2994 | Quality testing of caterpillar fungus found in low altitude                       | Information | 1 | 2066 | AP   |
| 2998 | Rainfall and snowfall/melting linked with less availability of caterpillar fungus | Information | 1 | 2069 | Raj  |
| 2999 | Rainfall and snowfall/melting linked with less availability of caterpillar fungus | Information | 1 | 2073 | Nag  |

|      |                                                                                   |             |   |      |     |
|------|-----------------------------------------------------------------------------------|-------------|---|------|-----|
| 3000 | Rainfall and snowfall/melting linked with less availability of caterpillar fungus | Information | 1 | 2069 | KP  |
| 3001 | Rainfall and snowfall/melting linked with less availability of caterpillar fungus | Information | 1 | 2073 | Raj |
| 3002 | Rainfall and snowfall/melting linked with less availability of caterpillar fungus | Information | 1 | 2074 | AP  |
| 3003 | Rainfall and snowfall/melting linked with less availability of caterpillar fungus | Information | 1 | 2073 | Nag |
| 3004 | Rainfall and snowfall/melting linked with less availability of caterpillar fungus | Information | 1 | 2066 | AP  |
| 3005 | Rainfall and snowfall/melting linked with less availability of caterpillar fungus | Information | 1 | 2068 | AP  |
| 3006 | Rainfall and snowfall/melting linked with less availability of caterpillar fungus | Information | 1 | 2071 | AP  |
| 3007 | Rainfall and snowfall/melting linked with less availability of caterpillar fungus | Information | 1 | 2071 | AP  |
| 3008 | Rainfall and snowfall/melting linked with less availability of caterpillar fungus | Information | 1 | 2072 | AP  |
| 3009 | Rainfall and snowfall/melting linked with less availability of caterpillar fungus | Information | 1 | 2073 | AP  |
| 3010 | Rainfall and snowfall/melting linked with less availability of caterpillar fungus | Information | 1 | 2074 | AP  |
| 3011 | Rainfall and snowfall/melting linked with less availability of caterpillar fungus | Information | 1 | 2065 | GKP |
| 3012 | Rainfall and snowfall/melting linked with less availability of caterpillar fungus | Information | 1 | 2066 | GKP |
| 3013 | Rainfall and snowfall/melting linked with less availability of caterpillar fungus | Information | 1 | 2067 | GKP |
| 3014 | Rainfall and snowfall/melting linked with less availability of caterpillar fungus | Information | 1 | 2071 | Nag |

|      |                                                                                                                                |             |   |      |      |
|------|--------------------------------------------------------------------------------------------------------------------------------|-------------|---|------|------|
| 3015 | Rainfall and snowfall/melting linked with less availability of caterpillar fungus                                              | Information | 1 | 2071 | Nag  |
| 3016 | Rainfall and snowfall/melting linked with less availability of caterpillar fungus                                              | Information | 1 | 2072 | KP   |
| 3017 | Rainfall and snowfall/melting linked with less availability of caterpillar fungus                                              | Information | 1 | 2065 | KP   |
| 3018 | Rainfall and snowfall/melting linked with less availability of caterpillar fungus                                              | Information | 1 | 2068 | GKP  |
| 3019 | Rainfall and snowfall/melting linked with less availability of caterpillar fungus                                              | Information | 1 | 2073 | KP   |
| 3020 | Rainfall and snowfall/melting linked with less availability of caterpillar fungus                                              | Information | 1 | 2076 | KP   |
| 3021 | Rainfall and snowfall/melting linked with less availability of caterpillar fungus                                              | Information | 1 | 2076 | KP   |
| 3022 | Rainfall and snowfall/melting linked with less availability of caterpillar fungus                                              | Information | 1 | 2076 | KP   |
| 3023 | Rainfall and snowfall/melting linked with less availability of caterpillar fungus (leading delayed sprouting)                  | Information | 1 | 2074 | KP   |
| 3024 | Rainfall and snowfall/melting linked with less availability of caterpillar fungus (leading harveters return)                   | Information | 1 | 2073 | Nag  |
| 3025 | Rainfall and snowfall/melting linked with less availability of caterpillar fungus (leading harveters return)                   | Information | 1 | 2066 | Naya |
| 3026 | Rainfall and snowfall/melting linked with less availability of caterpillar fungus (rainfall during collection degrades fungus) | Information | 1 | 2071 | KP   |
| 3027 | Rainfall and snowfall/melting linked with less availability of caterpillar fungus                                              | Information | 1 | 2076 | KP   |
| 3028 | Recommendation for regulation uniformity in forest entry                                                                       | Response    | 1 | 2073 | Nag  |
| 3029 | Records on caterpillar fungus available from local authorities                                                                 | Governance  | 1 | 2069 | Ka   |
| 3030 | Resource based conflict, picking caterpillar fungus in other controlled areas                                                  | Governance  | 1 | 2074 | AP   |
| 3031 | Responsibility of state for better management of caterpillar fungus                                                            | Gap         | 1 | 2066 | Raj  |
| 3032 | Responsibility of state for better management of caterpillar fungus                                                            | Gap         | 1 | 2076 | KP   |
| 3033 | Responsibility of state for better management of caterpillar fungus                                                            | Gap         | 1 | 2076 | KP   |

|      |                                                                     |            |   |      |      |
|------|---------------------------------------------------------------------|------------|---|------|------|
| 3034 | Responsibility of state for better management of caterpillar fungus | Gap        | 1 | 2076 | KP   |
| 3035 | Restriction in collection due to COVID-19(New)                      | Governance | 1 | 2078 | Ka   |
| 3036 | Restriction in collection due to COVID-19(New)                      | Governance | 1 | 2078 | KP   |
| 3037 | Restriction in collection due to COVID-19(New)                      | Governance | 1 | 2078 | KP   |
| 3038 | Restriction in collection due to COVID-19(New)                      | Governance | 1 | 2078 | KP   |
| 3039 | Restriction in collection due to COVID-19(New)                      | Governance | 1 | 2078 | Naya |
| 3040 | Restriction in collection due to COVID-19(New)                      | Governance | 1 | 2078 | Naya |
| 3041 | Restriction in collection due to COVID-19(New)                      | Governance | 1 | 2078 | Naya |
| 3042 | Restriction in collection due to COVID-19(New)                      | Governance | 1 | 2078 | Naya |
| 3043 | Restriction in collection due to COVID-19(New)                      | Governance | 1 | 2078 | Naya |
| 3044 | Restriction in collection due to COVID-19(New)                      | Governance | 1 | 2077 | RAJ  |
| 3045 | Restriction in collection due to COVID-19(New)                      | Governance | 1 | 2076 | Ka   |
| 3046 | Restriction in collection due to COVID-19(New)                      | Governance | 1 | 2077 | Ka   |
| 3047 | Restriction in collection due to COVID-19(New)                      | Governance | 1 | 2077 | Ka   |
| 3048 | Restriction in collection due to COVID-19(New)                      | Governance | 1 | 2077 | Ka   |
| 3049 | Restriction in collection due to COVID-19(New)                      | Governance | 1 | 2077 | Ka   |
| 3050 | Restriction in collection due to COVID-19(New)                      | Governance | 1 | 2077 | Ka   |
| 3051 | Restriction lifted to collectors from another district              | Governance | 1 | 2072 | AP   |
| 3052 | Restriction lifted to collectors from another district              | Governance | 1 | 2076 | KP   |
| 3053 | Restriction of caterpillar fungus collection due to COVID-19        | Governance | 1 | 2076 | KP   |
| 3054 | Restriction of caterpillar fungus collection due to COVID-19        | Governance | 1 | 2076 | KP   |
| 3055 | Restriction of caterpillar fungus collection due to COVID-19        | Governance | 1 | 2076 | KP   |
| 3056 | Restriction of caterpillar fungus collection due to COVID-19        | Governance | 1 | 2076 | KP   |
| 3057 | Restriction of caterpillar fungus collection due to COVID-19        | Governance | 1 | 2076 | KP   |
| 3058 | Restriction of caterpillar fungus collection due to COVID-19        | Governance | 1 | 2076 | KP   |
| 3059 | Restriction of caterpillar fungus collection due to COVID-19        | Governance | 1 | 2076 | KP   |
| 3060 | Restriction of caterpillar fungus collection due to COVID-19        | Governance | 1 | 2076 | KP   |
| 3061 | Restriction of caterpillar fungus collection due to COVID-19        | Governance | 1 | 2076 | KP   |
| 3062 | Restriction of caterpillar fungus collection due to COVID-19        | Governance | 1 | 2076 | KP   |
| 3063 | Restriction of children to take them to the pastures                | Governance | 1 | 2076 | AP   |
| 3064 | Restriction of collectors (below 14 years old)                      | Governance | 1 | 2068 | Raj  |

|      |                                                                      |            |   |      |      |
|------|----------------------------------------------------------------------|------------|---|------|------|
| 3065 | Restriction of collectors (below 14 years old)                       | Governance | 1 | 2067 | Nag  |
| 3066 | Restriction of collectors (below 14 years old)                       | Governance | 1 | 2067 | KP   |
| 3067 | Restriction of collectors (below 14 years old)                       | Governance | 1 | 2071 | KP   |
| 3068 | Restriction of collectors from outside district                      | Governance | 1 | 2067 | Nag  |
| 3069 | Restriction of collectors from outside district                      | Governance | 1 | 2067 | Nag  |
| 3070 | Restriction of collectors from outside district                      | Governance | 1 | 2068 | Nag  |
| 3071 | Restriction of collectors from outside district                      | Governance | 1 | 2065 | Raj  |
| 3072 | Restriction of collectors from outside district                      | Governance | 1 | 2067 | Raj  |
| 3073 | Restriction of collectors from outside district                      | Governance | 1 | 2067 | Raj  |
| 3074 | Restriction of collectors from outside district                      | Governance | 1 | 2069 | Raj  |
| 3075 | Restriction of collectors from outside district                      | Governance | 1 | 2067 | KP   |
| 3076 | Restriction of collectors from outside district                      | Governance | 1 | 2067 | Naya |
| 3077 | Restriction of collectors from outside district                      | Governance | 1 | 2072 | KP   |
| 3078 | Restriction of collectors from outside district                      | Governance | 1 | 2076 | KP   |
| 3079 | Restriction of collectors from outside district (due to forest fire) | Governance | 1 | 2072 | KP   |
| 3080 | Restriction of collectors from outside district (due to forest fire) | Governance | 1 | 2067 | Raj  |
| 3081 | Restriction on open grazing in the pastures                          | Governance | 1 | 2070 | Naya |
| 3082 | Restriction on trade of caterpillar fungus                           | Governance | 1 | 2072 | GKP  |
| 3083 | Restriction on trade of caterpillar fungus                           | Governance | 1 | 2070 | GKP  |
| 3084 | Restriction to harvest inside National parks                         | Governance | 1 | 2071 | KP   |
| 3085 | Restriction to harvest inside National parks                         | Governance | 1 | 2076 | KP   |
| 3086 | Restriction to harvest inside National parks                         | Governance | 1 | 2076 | KP   |
| 3087 | Restriction to harvest inside National parks                         | Governance | 1 | 2068 | Ka   |
| 3088 | Restriction to harvest inside National parks                         | Governance | 1 | 2078 | Naya |
| 3089 | Restriction to harvest inside National parks                         | Governance | 1 | 2078 | Naya |
| 3090 | Restriction to harvest inside National parks                         | Governance | 1 | 2078 | Naya |
| 3091 | Restriction to harvest inside National parks                         | Governance | 1 | 2068 | Ka   |
| 3092 | Revenue amount from international trade reported                     | Trade      | 1 | 2072 | KP   |
| 3093 | Revenue amount from international trade reported                     | Trade      | 1 | 2068 | Ka   |
| 3094 | Revenue collected by local authorities and government                | Governance | 1 | 2074 | Ka   |
| 3095 | Revenue collected by local insitutions                               | Governance | 1 | 2078 | KP   |

|      |                                         |            |   |      |     |
|------|-----------------------------------------|------------|---|------|-----|
| 3096 | Revenue collected by local institutions | Governance | 1 | 2078 | Ka  |
| 3097 | Revenue collected by local institutions | Governance | 1 | 2068 | Nag |
| 3098 | Revenue collected by local institutions | Governance | 1 | 2065 | AP  |
| 3099 | Revenue collected by local institutions | Governance | 1 | 2065 | AP  |
| 3100 | Revenue collected by local institutions | Governance | 1 | 2066 | AP  |
| 3101 | Revenue collected by local institutions | Governance | 1 | 2066 | AP  |
| 3102 | Revenue collected by local institutions | Governance | 1 | 2067 | AP  |
| 3103 | Revenue collected by local institutions | Governance | 1 | 2069 | AP  |
| 3104 | Revenue collected by local institutions | Governance | 1 | 2069 | AP  |
| 3105 | Revenue collected by local institutions | Governance | 1 | 2071 | AP  |
| 3106 | Revenue collected by local institutions | Governance | 1 | 2072 | AP  |
| 3107 | Revenue collected by local institutions | Governance | 1 | 2071 | KP  |
| 3108 | Revenue collected by local institutions | Governance | 1 | 2071 | Nag |
| 3109 | Revenue collected by local institutions | Governance | 1 | 2068 | Raj |
| 3110 | Revenue collected by local institutions | Governance | 1 | 2074 | GKP |
| 3111 | Revenue collected by local institutions | Governance | 1 | 2072 | KP  |
| 3112 | Revenue collected by local institutions | Governance | 1 | 2071 | Nag |
| 3113 | Revenue collected by local institutions | Governance | 1 | 2065 | AP  |
| 3114 | Revenue collected by local institutions | Governance | 1 | 2071 | KP  |
| 3115 | Revenue collected by local institutions | Governance | 1 | 2076 | KP  |
| 3116 | Revenue collected by local institutions | Governance | 1 | 2071 | KP  |
| 3117 | Revenue collected by local institutions | Governance | 1 | 2073 | AP  |
| 3118 | Revenue collected by local institutions | Governance | 1 | 2070 | Nag |
| 3119 | Revenue collected by local institutions | Governance | 1 | 2071 | Nag |
| 3120 | Revenue collected by local institutions | Governance | 1 | 2073 | Nag |
| 3121 | Revenue collected by local institutions | Governance | 1 | 2071 | Nag |
| 3122 | Revenue collected by local institutions | Governance | 1 | 2066 | GKP |
| 3123 | Revenue collected by local institutions | Governance | 1 | 2065 | KP  |
| 3124 | Revenue collected by local institutions | Governance | 1 | 2074 | KP  |
| 3125 | Revenue collected by local institutions | Governance | 1 | 2069 | KP  |
| 3126 | Revenue collected by local institutions | Governance | 1 | 2071 | Nag |



|      |                                         |            |   |      |      |
|------|-----------------------------------------|------------|---|------|------|
| 3127 | Revenue collected by local institutions | Governance | 1 | 2065 | Raj  |
| 3128 | Revenue collected by local institutions | Governance | 1 | 2069 | Raj  |
| 3129 | Revenue collected by Maoist 22K per kg  | Governance | 1 | 2076 | AP   |
| 3130 | Revenue collection decreased            | Governance | 1 | 2066 | GKP  |
| 3131 | Revenue collection decreased            | Governance | 1 | 2068 | KP   |
| 3132 | Revenue collection decreased            | Governance | 1 | 2071 | Nag  |
| 3133 | Revenue collection decreased            | Governance | 1 | 2074 | KP   |
| 3134 | Revenue collection decreased            | Governance | 1 | 2071 | Ka   |
| 3135 | Revenue collection decreased            | Governance | 1 | 2069 | Nag  |
| 3136 | Revenue collection decreased            | Governance | 1 | 2070 | Nag  |
| 3137 | Revenue collection decreased            | Governance | 1 | 2071 | Nag  |
| 3138 | Revenue collection decreased            | Governance | 1 | 2072 | Nag  |
| 3139 | Revenue collection decreased            | Governance | 1 | 2069 | Raj  |
| 3140 | Revenue collection decreased            | Governance | 1 | 2071 | Ka   |
| 3141 | Revenue collection decreased            | Governance | 1 | 2073 | Ka   |
| 3142 | Revenue collection decreased            | Governance | 1 | 2071 | Raj  |
| 3143 | Revenue collection decreased            | Governance | 1 | 2069 | Naya |
| 3144 | Revenue collection decreased            | Governance | 1 | 2071 | Nag  |
| 3145 | Revenue collection decreased            | Governance | 1 | 2070 | Nag  |
| 3146 | Revenue collection decreased            | Governance | 1 | 2069 | Nag  |
| 3147 | Revenue collection decreased            | Governance | 1 | 2072 | Ka   |
| 3148 | Revenue collection decreased            | Governance | 1 | 2073 | Nag  |
| 3149 | Revenue collection decreased            | Governance | 1 | 2071 | Nag  |
| 3150 | Revenue collection decreased            | Governance | 1 | 2066 | Raj  |
| 3151 | Revenue collection decreased            | Governance | 1 | 2071 | Nag  |
| 3152 | Revenue collection decreased            | Governance | 1 | 2073 | Ka   |
| 3153 | Revenue collection decreased            | Governance | 1 | 2071 | Nag  |
| 3154 | Revenue collection decreased            | Governance | 1 | 2071 | Nag  |
| 3155 | Revenue collection decreased            | Governance | 1 | 2071 | Nag  |
| 3156 | Revenue collection decreased            | Governance | 1 | 2071 | Nag  |
| 3157 | Revenue collection decreased            | Governance | 1 | 2072 | Nag  |

|      |                                                       |            |   |      |      |
|------|-------------------------------------------------------|------------|---|------|------|
| 3158 | Revenue collection decreased                          | Governance | 1 | 2069 | Naya |
| 3159 | Revenue collection decreased                          | Governance | 1 | 2072 | Nag  |
| 3160 | Revenue collection decreased                          | Governance | 1 | 2072 | Naya |
| 3161 | Revenue collection decreased                          | Governance | 1 | 2073 | Nag  |
| 3162 | Revenue collection decreased                          | Governance | 1 | 2072 | Ka   |
| 3163 | Revenue collection decreased                          | Governance | 1 | 2069 | Nag  |
| 3164 | Revenue collection decreased                          | Governance | 1 | 2066 | Naya |
| 3165 | Revenue collection decreased                          | Governance | 1 | 2069 | Naya |
| 3166 | Revenue collection decreased                          | Governance | 1 | 2069 | Naya |
| 3167 | Revenue collection decreased                          | Governance | 1 | 2065 | Raj  |
| 3168 | Revenue collection decreased                          | Governance | 1 | 2065 | Raj  |
| 3169 | Revenue collection decreased                          | Governance | 1 | 2069 | Raj  |
| 3170 | Revenue collection decreased                          | Governance | 1 | 2071 | Ka   |
| 3171 | Revenue collection decreased                          | Governance | 1 | 2071 | AP   |
| 3172 | Revenue collection decreased                          | Governance | 1 | 2070 | AP   |
| 3173 | Revenue collection decreased                          | Governance | 1 | 2073 | Raj  |
| 3174 | Revenue collection decreased                          | Governance | 1 | 2065 | GKP  |
| 3175 | Revenue collection decreased                          | Governance | 1 | 2072 | Nag  |
| 3176 | Revenue collection decreased                          | Governance | 1 | 2071 | Nag  |
| 3177 | Revenue collection decreased                          | Governance | 1 | 2071 | Nag  |
| 3178 | Revenue collection decreased                          | Governance | 1 | 2068 | Raj  |
| 3179 | Revenue collection decreased                          | Governance | 1 | 2071 | KP   |
| 3180 | Revenue collection decreased (open border with China) | Governance | 1 | 2073 | AP   |
| 3181 | Revenue collection decreased (open border with China) | Governance | 1 | 2070 | GKP  |
| 3182 | Revenue collection decreased (open border with China) | Governance | 1 | 2074 | GKP  |
| 3183 | Revenue collection decreased (open border with China) | Governance | 1 | 2065 | Raj  |
| 3184 | Revenue collection decreased (open border with China) | Governance | 1 | 2070 | KP   |
| 3185 | Revenue collection decreased (open border with China) | Governance | 1 | 2070 | KP   |
| 3186 | Revenue collection decreased (open border with China) | Governance | 1 | 2072 | KP   |
| 3187 | Revenue collection decreased (open border with China) | Governance | 1 | 2072 | Ka   |
| 3188 | Revenue collection decreased (open border with China) | Governance | 1 | 2065 | KP   |

|      |                                                                              |            |   |      |      |
|------|------------------------------------------------------------------------------|------------|---|------|------|
| 3189 | Revenue collection decreased (open border with China)                        | Governance | 1 | 2074 | KP   |
| 3190 | Revenue collection decreased (open border)                                   | Governance | 1 | 2074 | KP   |
| 3191 | Revenue collection decreased (open border)                                   | Governance | 1 | 2070 | KP   |
| 3192 | Revenue collection decreased (open border)                                   | Governance | 1 | 2072 | KP   |
| 3193 | Revenue collection decreased (open border)                                   | Governance | 1 | 2068 | Ka   |
| 3194 | Revenue collection increased                                                 | Governance | 1 | 2072 | Ka   |
| 3195 | Revenue collection increased                                                 | Governance | 1 | 2069 | Raj  |
| 3196 | Revenue collection increased                                                 | Governance | 1 | 2069 | Naya |
| 3197 | Revenue collection increased                                                 | Governance | 1 | 2074 | Naya |
| 3198 | Revenue collection increased                                                 | Governance | 1 | 2070 | GKP  |
| 3199 | Revenue collection increased                                                 | Governance | 1 | 2073 | GKP  |
| 3200 | Revenue collection increased                                                 | Governance | 1 | 2069 | KP   |
| 3201 | Revenue collection increased                                                 | Governance | 1 | 2069 | KP   |
| 3202 | Revenue collection increased                                                 | Governance | 1 | 2069 | KP   |
| 3203 | Revenue collection increased (increased flow of harvesters)                  | Governance | 1 | 2071 | KP   |
| 3204 | Revenue contributed to support disaster victims                              | Governance | 1 | 2072 | KP   |
| 3205 | Revenue contributed to support disaster victims                              | Governance | 1 | 2072 | KP   |
| 3206 | Revenue distribution to local authorities from caterpillar fungus entry fees | Governance | 1 | 2072 | KP   |
| 3207 | Revenue distribution to local authorities from caterpillar fungus entry fees | Governance | 1 | 2074 | KP   |
| 3208 | Revenue from entry permit reported                                           | Governance | 1 | 2070 | KP   |
| 3209 | Revenue from entry permit reported                                           | Governance | 1 | 2070 | KP   |
| 3210 | Revenue from entry permit reported                                           | Governance | 1 | 2073 | Raj  |
| 3211 | Revenue from entry permit reported                                           | Governance | 1 | 2071 | Nag  |
| 3212 | Revenue from entry permit reported                                           | Governance | 1 | 2069 | Nag  |
| 3213 | Revenue from entry permit reported                                           | Governance | 1 | 2065 | KP   |
| 3214 | Revenue from entry permit reported                                           | Governance | 1 | 2065 | KP   |
| 3215 | Revenue from entry permit reported                                           | Governance | 1 | 2071 | Nag  |
| 3216 | Revenue from entry permit reported                                           | Governance | 1 | 2073 | Naya |
| 3217 | Revenue from entry permit reported                                           | Governance | 1 | 2074 | Naya |

|      |                                                            |            |   |      |      |
|------|------------------------------------------------------------|------------|---|------|------|
| 3218 | Revenue from entry permit reported                         | Governance | 1 | 2071 | Ka   |
| 3219 | Revenue from entry permit reported                         | Governance | 1 | 2071 | Ka   |
| 3220 | Revenue from entry permit reported                         | Governance | 1 | 2074 | Ka   |
| 3221 | Revenue from entry permit reported                         | Governance | 1 | 2066 | Raj  |
| 3222 | Revenue from entry permit reported                         | Governance | 1 | 2066 | Raj  |
| 3223 | Revenue from entry permit reported                         | Governance | 1 | 2070 | KP   |
| 3224 | Revenue not contributed to harvesters rights               | Governance | 1 | 2071 | KP   |
| 3225 | Revenue per kg of caterpillar fungus decreased             | Governance | 1 | 2068 | Raj  |
| 3226 | Revenue per kg of caterpillar fungus decreased             | Governance | 1 | 2072 | Nag  |
| 3227 | Revenue per kg of caterpillar fungus decreased             | Governance | 1 | 2069 | Naya |
| 3228 | Revenue per kg of caterpillar fungus increased             | Governance | 1 | 2070 | Nag  |
| 3229 | Revenue per kg of caterpillar fungus increased             | Governance | 1 | 2071 | Nag  |
| 3230 | Revenue per kg of caterpillar fungus reported              | Governance | 1 | 2066 | KP   |
| 3231 | Revenue per kg of caterpillar fungus reported              | Governance | 1 | 2066 | KP   |
| 3232 | Revenue per kg of caterpillar fungus reported              | Governance | 1 | 2070 | GKP  |
| 3233 | Revenue per kg of caterpillar fungus reported              | Governance | 1 | 2066 | Raj  |
| 3234 | Revenue per kg of caterpillar fungus reported              | Governance | 1 | 2067 | Nag  |
| 3235 | Revenue per kg of caterpillar fungus reported              | Governance | 1 | 2076 | KP   |
| 3236 | Revenue per kg of caterpillar fungus reported (10k)        | Governance | 1 | 2069 | Nag  |
| 3237 | Revenue per kg of caterpillar fungus reported (10k)        | Governance | 1 | 2072 | GKP  |
| 3238 | Revenue per kg of caterpillar fungus reported (10k)        | Governance | 1 | 2073 | Raj  |
| 3239 | Revenue per kg of caterpillar fungus reported (10k)        | Governance | 1 | 2072 | KP   |
| 3240 | Revenue per kg of caterpillar fungus reported (10k)        | Governance | 1 | 2071 | Ka   |
| 3241 | Revenue per kg of caterpillar fungus reported (10k)        | Governance | 1 | 2074 | Ka   |
| 3242 | Revenue per kg of caterpillar fungus reported (10k)        | Governance | 1 | 2065 | KP   |
| 3243 | Revenue per kg of caterpillar fungus reported (10k)        | Governance | 1 | 2065 | AP   |
| 3244 | Revenue per kg of caterpillar fungus reported (10k)        | Governance | 1 | 2067 | Raj  |
| 3245 | Revenue per kg of caterpillar fungus reported (10k)        | Governance | 1 | 2068 | Raj  |
| 3246 | Rotational harvesting of caterpillar fungus sustainability | Governance | 1 | 2067 | Naya |
| 3247 | Rotational harvesting of caterpillar fungus sustainability | Governance | 1 | 2074 | Naya |
| 3248 | Rotational harvesting of caterpillar fungus sustainability | Governance | 1 | 2073 | Raj  |

|      |                                              |             |   |      |      |
|------|----------------------------------------------|-------------|---|------|------|
| 3249 | Sale of caterpillar fungus to local traders  | Trade       | 1 | 2070 | AP   |
| 3250 | Sale of caterpillar fungus to local traders  | Trade       | 1 | 2070 | AP   |
| 3251 | Sale of caterpillar fungus to local traders  | Trade       | 1 | 2071 | AP   |
| 3252 | Sale of caterpillar fungus to local traders  | Trade       | 1 | 2074 | AP   |
| 3253 | Sanctions in place for breaching rules       | Governance  | 1 | 2066 | Raj  |
| 3254 | Sanctions in place for breaching rules       | Governance  | 1 | 2066 | Raj  |
| 3255 | Sanctions in place for breaching rules       | Governance  | 1 | 2066 | Raj  |
| 3256 | Sanctions in place for breaching rules       | Governance  | 1 | 2066 | Raj  |
| 3257 | Sanctions in place for breaching rules       | Governance  | 1 | 2068 | Raj  |
| 3258 | Sanctions in place for breaching rules       | Governance  | 1 | 2068 | Raj  |
| 3259 | Sanctions in place for breaching rules       | Governance  | 1 | 2069 | Raj  |
| 3260 | Schools (mobile) in the pastures             | Impacts     | 1 | 2066 | Naya |
| 3261 | Scientific information of caterpillar fungus | Information | 1 | 2067 | Naya |
| 3262 | Scientific information of caterpillar fungus | Information | 1 | 2069 | Naya |
| 3263 | Scientific information of caterpillar fungus | Information | 1 | 2073 | Naya |
| 3264 | Scientific information of caterpillar fungus | Information | 1 | 2073 | Naya |
| 3265 | Scientific information of caterpillar fungus | Information | 1 | 2074 | Naya |
| 3266 | Scientific information of caterpillar fungus | Information | 1 | 2067 | Nag  |
| 3267 | Scientific information of caterpillar fungus | Information | 1 | 2068 | Nag  |
| 3268 | Scientific information of caterpillar fungus | Information | 1 | 2071 | Nag  |
| 3269 | Scientific information of caterpillar fungus | Information | 1 | 2073 | Nag  |
| 3270 | Scientific information of caterpillar fungus | Information | 1 | 2074 | Nag  |
| 3271 | Scientific information of caterpillar fungus | Information | 1 | 2074 | Nag  |
| 3272 | Scientific information of caterpillar fungus | Information | 1 | 2070 | Nag  |
| 3273 | Scientific information of caterpillar fungus | Information | 1 | 2070 | Nag  |
| 3274 | Scientific information of caterpillar fungus | Information | 1 | 2065 | Raj  |
| 3275 | Scientific information of caterpillar fungus | Information | 1 | 2065 | Raj  |
| 3276 | Scientific information of caterpillar fungus | Information | 1 | 2065 | Raj  |
| 3277 | Scientific information of caterpillar fungus | Information | 1 | 2066 | Raj  |
| 3278 | Scientific information of caterpillar fungus | Information | 1 | 2066 | Raj  |
| 3279 | Scientific information of caterpillar fungus | Information | 1 | 2066 | Raj  |

|      |                                              |             |   |      |     |
|------|----------------------------------------------|-------------|---|------|-----|
| 3280 | Scientific information of caterpillar fungus | Information | 1 | 2068 | Raj |
| 3281 | Scientific information of caterpillar fungus | Information | 1 | 2067 | Nag |
| 3282 | Scientific information of caterpillar fungus | Information | 1 | 2067 | Nag |
| 3283 | Scientific information of caterpillar fungus | Information | 1 | 2068 | Nag |
| 3284 | Scientific information of caterpillar fungus | Information | 1 | 2069 | Nag |
| 3285 | Scientific information of caterpillar fungus | Information | 1 | 2070 | Nag |
| 3286 | Scientific information of caterpillar fungus | Information | 1 | 2070 | Nag |
| 3287 | Scientific information of caterpillar fungus | Information | 1 | 2070 | Nag |
| 3288 | Scientific information of caterpillar fungus | Information | 1 | 2071 | Nag |
| 3289 | Scientific information of caterpillar fungus | Information | 1 | 2071 | Nag |
| 3290 | Scientific information of caterpillar fungus | Information | 1 | 2073 | Nag |
| 3291 | Scientific information of caterpillar fungus | Information | 1 | 2074 | Nag |
| 3292 | Scientific information of caterpillar fungus | Information | 1 | 2066 | KP  |
| 3293 | Scientific information of caterpillar fungus | Information | 1 | 2069 | KP  |
| 3294 | Scientific information of caterpillar fungus | Information | 1 | 2069 | KP  |
| 3295 | Scientific information of caterpillar fungus | Information | 1 | 2070 | KP  |
| 3296 | Scientific information of caterpillar fungus | Information | 1 | 2071 | KP  |
| 3297 | Scientific information of caterpillar fungus | Information | 1 | 2072 | KP  |
| 3298 | Scientific information of caterpillar fungus | Information | 1 | 2073 | KP  |
| 3299 | Scientific information of caterpillar fungus | Information | 1 | 2074 | KP  |
| 3300 | Scientific information of caterpillar fungus | Information | 1 | 2065 | KP  |
| 3301 | Scientific information of caterpillar fungus | Information | 1 | 2070 | AP  |
| 3302 | Scientific information of caterpillar fungus | Information | 1 | 2067 | GKP |
| 3303 | Scientific information of caterpillar fungus | Information | 1 | 2074 | GKP |
| 3304 | Scientific information of caterpillar fungus | Information | 1 | 2065 | KP  |
| 3305 | Scientific information of caterpillar fungus | Information | 1 | 2071 | Ka  |
| 3306 | Scientific information of caterpillar fungus | Information | 1 | 2072 | KP  |
| 3307 | Scientific information of caterpillar fungus | Information | 1 | 2070 | AP  |
| 3308 | Scientific information of caterpillar fungus | Information | 1 | 2072 | KP  |
| 3309 | Scientific information of caterpillar fungus | Information | 1 | 2074 | KP  |
| 3310 | Scientific information of caterpillar fungus | Information | 1 | 2074 | KP  |

|      |                                                              |             |   |      |      |
|------|--------------------------------------------------------------|-------------|---|------|------|
| 3311 | Scientific information of caterpillar fungus                 | Information | 1 | 2068 | Raj  |
| 3312 | Scientific information of caterpillar fungus                 | Information | 1 | 2070 | Naya |
| 3313 | Scientific information of caterpillar fungus                 | Information | 1 | 2065 | KP   |
| 3314 | Scientific information of caterpillar fungus                 | Information | 1 | 2071 | Nag  |
| 3315 | Scientific information of caterpillar fungus                 | Information | 1 | 2071 | Nag  |
| 3316 | Scientific information of caterpillar fungus                 | Information | 1 | 2069 | KP   |
| 3317 | Scientific information of caterpillar fungus                 | Information | 1 | 2069 | KP   |
| 3318 | Scientific information of caterpillar fungus                 | Information | 1 | 2069 | KP   |
| 3319 | Scientific information of caterpillar fungus                 | Information | 1 | 2072 | KP   |
| 3320 | Scientific information of caterpillar fungus                 | Information | 1 | 2066 | Raj  |
| 3321 | Scientific information of caterpillar fungus                 | Information | 1 | 2067 | Raj  |
| 3322 | Scientific information of caterpillar fungus                 | Information | 1 | 2072 | KP   |
| 3323 | Scientific information of caterpillar fungus                 | Information | 1 | 2071 | Ka   |
| 3324 | Scientific information of caterpillar fungus                 | Information | 1 | 2070 | GKP  |
| 3325 | Scientific information of caterpillar fungus                 | Information | 1 | 2072 | KP   |
| 3326 | Scientific information of caterpillar fungus                 | Information | 1 | 2073 | KP   |
| 3327 | Seasonal management committee not fee with                   | Governance  | 1 | 2069 | Nag  |
| 3328 | Security arrangement through "one security"                  | Response    | 1 | 2071 | KP   |
| 3329 | Security demanded by the harvesters                          | Gap         | 1 | 2072 | Naya |
| 3330 | Security demanded by the harvesters                          | Gap         | 1 | 2070 | Naya |
| 3331 | Security demanded by the harvesters                          | Gap         | 1 | 2074 | KP   |
| 3332 | Security disguising in uniform rob traders                   | Impacts     | 1 | 2065 | Naya |
| 3333 | Security disguising in uniform rob traders                   | Impacts     | 1 | 2071 | AP   |
| 3334 | Security in the pastures                                     | Response    | 1 | 2070 | KP   |
| 3335 | Security in the pastures                                     | Response    | 1 | 2073 | GKP  |
| 3336 | Security in the pastures                                     | Response    | 1 | 2073 | Ka   |
| 3337 | Security in the pastures                                     | Response    | 1 | 2071 | KP   |
| 3338 | Security in the pastures                                     | Response    | 1 | 2073 | Raj  |
| 3339 | Security in the pastures                                     | Response    | 1 | 2072 | KP   |
| 3340 | Security strengthened through check posts                    | Response    | 1 | 2071 | Nag  |
| 3341 | Selected harvester provided permission to harvest (conflict) | Governance  | 1 | 2072 | KP   |

|      |                                                                               |             |   |      |      |
|------|-------------------------------------------------------------------------------|-------------|---|------|------|
| 3342 | Self collection of caterpillar fungus by the communities reported             | Governance  | 1 | 2072 | KP   |
| 3343 | Settlement of harvesters in the pastures                                      | Harvesting  | 1 | 2074 | Raj  |
| 3344 | Shift of caterpillar fungus to higher altitude                                | Information | 1 | 2070 | Nag  |
| 3345 | Smaller size of caterpillar fungus                                            | Information | 1 | 2071 | Nag  |
| 3346 | Snowfall (timely) linked with good production of caterpillar fungus           | Information | 1 | 2071 | Nag  |
| 3347 | Snowfall (timely) linked with good production of caterpillar fungus           | Information | 1 | 2066 | KP   |
| 3348 | Snowfall (timely) linked with good production of caterpillar fungus           | Information | 1 | 2065 | KP   |
| 3349 | Snowfall (timely) linked with good production of caterpillar fungus           | Information | 1 | 2069 | KP   |
| 3350 | Snowfall in December impacted caterpillar fungus collection                   | Information | 1 | 2071 | Nag  |
| 3351 | Snowfall in lower altitude                                                    | Information | 1 | 2071 | KP   |
| 3352 | Snowfall in the pastures                                                      | Information | 1 | 2071 | KP   |
| 3353 | Snowfall in the pastures                                                      | Information | 1 | 2076 | KP   |
| 3354 | Start of the caterpillar collection by launching air gunfire by the committee | Harvesting  | 1 | 2071 | KP   |
| 3355 | Start of the early harvest of caterpillar fungus                              | Harvesting  | 1 | 2070 | GKP  |
| 3356 | Start of the early harvest of caterpillar fungus                              | Harvesting  | 1 | 2070 | GKP  |
| 3357 | Start of the early harvest of caterpillar fungus                              | Harvesting  | 1 | 2071 | Ka   |
| 3358 | Start of the early harvest of caterpillar fungus                              | Harvesting  | 1 | 2071 | Ka   |
| 3359 | Start of the early harvest of caterpillar fungus                              | Harvesting  | 1 | 2065 | Raj  |
| 3360 | Start of the early harvest of caterpillar fungus                              | Harvesting  | 1 | 2068 | Raj  |
| 3361 | Start of the early harvest of caterpillar fungus                              | Harvesting  | 1 | 2069 | Raj  |
| 3362 | Start of the early harvest of caterpillar fungus                              | Harvesting  | 1 | 2065 | Naya |
| 3363 | Start of the early harvest of caterpillar fungus                              | Harvesting  | 1 | 2068 | Naya |
| 3364 | Start of the early harvest of caterpillar fungus                              | Harvesting  | 1 | 2076 | KP   |
| 3365 | Start of the early harvest of caterpillar fungus                              | Harvesting  | 1 | 2076 | KP   |
| 3366 | Start of the early harvest of caterpillar fungus                              | Harvesting  | 1 | 2074 | Naya |
| 3367 | Start of the early harvest of caterpillar fungus                              | Harvesting  | 1 | 2078 | Naya |
| 3368 | Start of the early harvest of caterpillar fungus                              | Harvesting  | 1 | 2078 | Naya |
| 3369 | Start of the early harvest of caterpillar fungus                              | Harvesting  | 1 | 2078 | Naya |
| 3370 | State disinterested to tackle smuggling issues                                | Gap         | 1 | 2069 | Naya |
| 3371 | State domination to harvesters                                                | Gap         | 1 | 2069 | Nag  |



|      |                                                                         |             |   |      |      |
|------|-------------------------------------------------------------------------|-------------|---|------|------|
| 3372 | State interest in biodiversity conservation                             | Response    | 1 | 2072 | Nag  |
| 3373 | State interest in biodiversity conservation                             | Response    | 1 | 2076 | KP   |
| 3374 | State interest in biodiversity conservation                             | Response    | 1 | 2076 | KP   |
| 3375 | State interested only on revenue collection than sustainable management | Gap         | 1 | 2072 | Nag  |
| 3376 | State interested only on revenue collection than sustainable management | Gap         | 1 | 2073 | Nag  |
| 3377 | State interested only on revenue collection than sustainable management | Gap         | 1 | 2065 | KP   |
| 3378 | State interested only on revenue collection than sustainable management | Gap         | 1 | 2070 | KP   |
| 3379 | State interested only on revenue collection than sustainable management | Gap         | 1 | 2073 | KP   |
| 3380 | State interested only on revenue collection than sustainable management | Gap         | 1 | 2071 | Nag  |
| 3381 | State interested only on revenue collection than sustainable management | Gap         | 1 | 2065 | Raj  |
| 3382 | State interested only on revenue collection than sustainable management | Gap         | 1 | 2071 | KP   |
| 3383 | State interested only on revenue collection than sustainable management | Gap         | 1 | 2076 | KP   |
| 3384 | State interested only on revenue collection than sustainable management | Gap         | 1 | 2078 | Naya |
| 3385 | Strict policies on illegal trade of caterpillar fungus (by China)       | Information | 1 | 2065 | Raj  |
| 3386 | Strict security checks in HK airports                                   | Response    | 1 | 2065 | Raj  |
| 3387 | Student harvesters disinterested in education due to good cash income   | Impacts     | 1 | 2065 | Raj  |
| 3388 | Student harvesters disinterested in education due to good cash income   | Impacts     | 1 | 2076 | KP   |
| 3389 | Student harvesters disinterested in education due to good cash income   | Impacts     | 1 | 2076 | KP   |

|      |                                                                                                      |             |   |      |     |
|------|------------------------------------------------------------------------------------------------------|-------------|---|------|-----|
| 3390 | Student harvesters disinterested in education due to good cash income                                | Impacts     | 1 | 2076 | KP  |
| 3391 | Student harvesters disinterested in education due to good cash income                                | Impacts     | 1 | 2076 | KP  |
| 3392 | Student harvesters disinterested in education due to good cash income                                | Impacts     | 1 | 2076 | KP  |
| 3393 | Student harvesters disinterested in education due to good cash income                                | Impacts     | 1 | 2076 | KP  |
| 3394 | Student harvesters disinterested in education due to good cash income                                | Impacts     | 1 | 2076 | KP  |
| 3395 | Student harvesters disinterested in education due to good cash income                                | Impacts     | 1 | 2076 | KP  |
| 3396 | Student harvesters disinterested in education due to good cash income                                | Impacts     | 1 | 2076 | KP  |
| 3397 | Student harvesters disinterested in education due to good cash income                                | Impacts     | 1 | 2076 | KP  |
| 3398 | Student harvesters disinterested in education due to good cash income                                | Impacts     | 1 | 2076 | KP  |
| 3399 | Student harvesters disinterested in education due to good cash income                                | Impacts     | 1 | 2076 | KP  |
| 3400 | Sustainable management of caterpillar fungus via collaboration                                       | Information | 1 | 2073 | Nag |
| 3401 | Sustainable management of caterpillar fungus via collaboration                                       | Information | 1 | 2075 | Ka  |
| 3402 | Sustainable management of caterpillar fungus via collaboration                                       | Information | 1 | 2076 | KP  |
| 3403 | Sustainable management of caterpillar fungus via collaboration                                       | Information | 1 | 2076 | KP  |
| 3404 | Sustainable management of caterpillar fungus via collaboration                                       | Information | 1 | 2076 | KP  |
| 3405 | Sustainable management of caterpillar fungus via collaboration                                       | Information | 1 | 2076 | KP  |
| 3406 | Sustainable management of caterpillar fungus via collaboration                                       | Information | 1 | 2076 | KP  |
| 3407 | Sustainable management of caterpillar fungus via collaboration                                       | Information | 1 | 2076 | KP  |
| 3408 | Task force to study (better management, related conflicts and revenue leakage of caterpillar fungus) | Response    | 1 | 2065 | KP  |

|      |                                                                                                      |            |   |      |     |
|------|------------------------------------------------------------------------------------------------------|------------|---|------|-----|
| 3409 | Task force to study (better management, related conflicts and revenue leakage of caterpillar fungus) | Response   | 1 | 2074 | AP  |
| 3410 | Task force to study (better management, related conflicts and revenue leakage of caterpillar fungus) | Response   | 1 | 2067 | GKP |
| 3411 | Tax evasion (revenue) by traders                                                                     | Trade      | 1 | 2073 | AP  |
| 3412 | Tax evasion (revenue) by traders                                                                     | Trade      | 1 | 2072 | AP  |
| 3413 | Tax evasion (revenue) by traders                                                                     | Trade      | 1 | 2074 | AP  |
| 3414 | Tax evasion (revenue) by traders                                                                     | Trade      | 1 | 2074 | AP  |
| 3415 | Tax evasion (revenue) by traders                                                                     | Trade      | 1 | 2066 | AP  |
| 3416 | Tax evasion (revenue) by traders                                                                     | Trade      | 1 | 2065 | GKP |
| 3417 | Tax evasion (revenue) by traders                                                                     | Trade      | 1 | 2073 | Raj |
| 3418 | Tax evasion (revenue) by traders                                                                     | Trade      | 1 | 2073 | Raj |
| 3419 | Tax evasion (revenue) by traders                                                                     | Trade      | 1 | 2072 | KP  |
| 3420 | Tax evasion (revenue) by traders                                                                     | Trade      | 1 | 2065 | AP  |
| 3421 | Tax evasion (revenue) by traders                                                                     | Trade      | 1 | 2065 | AP  |
| 3422 | Tax evasion (revenue) by traders                                                                     | Trade      | 1 | 2071 | Ka  |
| 3423 | Tax evasion (revenue) by traders                                                                     | Trade      | 1 | 2071 | Ka  |
| 3424 | Tax evasion (revenue) by traders                                                                     | Trade      | 1 | 2072 | Ka  |
| 3425 | Tax evasion (revenue) by traders                                                                     | Trade      | 1 | 2072 | Ka  |
| 3426 | Tax evasion (revenue) by traders                                                                     | Trade      | 1 | 2072 | Ka  |
| 3427 | Tax evasion (revenue) by traders                                                                     | Trade      | 1 | 2072 | Ka  |
| 3428 | Tax to export caterpillar fungus (7k)                                                                | Governance | 1 | 2072 | Ka  |
| 3429 | Taxation to harvesters from outside district                                                         | Governance | 1 | 2072 | Ka  |
| 3430 | Taxes paid to maoist during insurgency                                                               | Governance | 1 | 2073 | Ka  |
| 3431 | Tender amount for entry permits                                                                      | Governance | 1 | 2073 | Ka  |
| 3432 | Tender amount to purchases caterpillar fungus increased                                              | Governance | 1 | 2074 | Ka  |
| 3433 | Tender of managing caterpillar fungus to local community                                             | Governance | 1 | 2074 | Ka  |
| 3434 | Tender of managing caterpillar fungus to local community                                             | Governance | 1 | 2067 | GKP |
| 3435 | Tender of managing caterpillar fungus to local community                                             | Governance | 1 | 2076 | KP  |
| 3436 | Tender provided to contractors to purchase caterpillar fungus                                        | Governance | 1 | 2067 | GKP |
| 3437 | Tibetan port used to export caterpillar fungus                                                       | Trade      | 1 | 2073 | GKP |

|      |                                            |            |   |      |     |
|------|--------------------------------------------|------------|---|------|-----|
| 3438 | Time/Date of caterpillar fungus collection | Harvesting | 1 | 2073 | GKP |
| 3439 | Time/Date of caterpillar fungus collection | Harvesting | 1 | 2073 | GKP |
| 3440 | Time/Date of caterpillar fungus collection | Harvesting | 1 | 2074 | GKP |
| 3441 | Time/Date of caterpillar fungus collection | Harvesting | 1 | 2065 | KP  |
| 3442 | Time/Date of caterpillar fungus collection | Harvesting | 1 | 2065 | KP  |
| 3443 | Time/Date of caterpillar fungus collection | Harvesting | 1 | 2065 | KP  |
| 3444 | Time/Date of caterpillar fungus collection | Harvesting | 1 | 2065 | KP  |
| 3445 | Time/Date of caterpillar fungus collection | Harvesting | 1 | 2066 | KP  |
| 3446 | Time/Date of caterpillar fungus collection | Harvesting | 1 | 2068 | KP  |
| 3447 | Time/Date of caterpillar fungus collection | Harvesting | 1 | 2069 | KP  |
| 3448 | Time/Date of caterpillar fungus collection | Harvesting | 1 | 2069 | KP  |
| 3449 | Time/Date of caterpillar fungus collection | Harvesting | 1 | 2070 | KP  |
| 3450 | Time/Date of caterpillar fungus collection | Harvesting | 1 | 2070 | KP  |
| 3451 | Time/Date of caterpillar fungus collection | Harvesting | 1 | 2071 | KP  |
| 3452 | Time/Date of caterpillar fungus collection | Harvesting | 1 | 2071 | KP  |
| 3453 | Time/Date of caterpillar fungus collection | Harvesting | 1 | 2071 | KP  |
| 3454 | Time/Date of caterpillar fungus collection | Harvesting | 1 | 2071 | KP  |
| 3455 | Time/Date of caterpillar fungus collection | Harvesting | 1 | 2071 | KP  |
| 3456 | Time/Date of caterpillar fungus collection | Harvesting | 1 | 2071 | KP  |
| 3457 | Time/Date of caterpillar fungus collection | Harvesting | 1 | 2071 | KP  |
| 3458 | Time/Date of caterpillar fungus collection | Harvesting | 1 | 2072 | KP  |
| 3459 | Time/Date of caterpillar fungus collection | Harvesting | 1 | 2072 | KP  |
| 3460 | Time/Date of caterpillar fungus collection | Harvesting | 1 | 2072 | KP  |
| 3461 | Time/Date of caterpillar fungus collection | Harvesting | 1 | 2072 | KP  |
| 3462 | Time/Date of caterpillar fungus collection | Harvesting | 1 | 2072 | KP  |
| 3463 | Time/Date of caterpillar fungus collection | Harvesting | 1 | 2073 | KP  |
| 3464 | Time/Date of caterpillar fungus collection | Harvesting | 1 | 2073 | KP  |
| 3465 | Time/Date of caterpillar fungus collection | Harvesting | 1 | 2074 | KP  |
| 3466 | Time/Date of caterpillar fungus collection | Harvesting | 1 | 2074 | KP  |
| 3467 | Time/Date of caterpillar fungus collection | Harvesting | 1 | 2074 | KP  |
| 3468 | Time/Date of caterpillar fungus collection | Harvesting | 1 | 2074 | KP  |

|      |                                            |            |   |      |      |
|------|--------------------------------------------|------------|---|------|------|
| 3469 | Time/Date of caterpillar fungus collection | Harvesting | 1 | 2074 | KP   |
| 3470 | Time/Date of caterpillar fungus collection | Harvesting | 1 | 2074 | KP   |
| 3471 | Time/Date of caterpillar fungus collection | Harvesting | 1 | 2074 | KP   |
| 3472 | Time/Date of caterpillar fungus collection | Harvesting | 1 | 2065 | Raj  |
| 3473 | Time/Date of caterpillar fungus collection | Harvesting | 1 | 2065 | Raj  |
| 3474 | Time/Date of caterpillar fungus collection | Harvesting | 1 | 2066 | Raj  |
| 3475 | Time/Date of caterpillar fungus collection | Harvesting | 1 | 2066 | Raj  |
| 3476 | Time/Date of caterpillar fungus collection | Harvesting | 1 | 2066 | Raj  |
| 3477 | Time/Date of caterpillar fungus collection | Harvesting | 1 | 2067 | Raj  |
| 3478 | Time/Date of caterpillar fungus collection | Harvesting | 1 | 2068 | Raj  |
| 3479 | Time/Date of caterpillar fungus collection | Harvesting | 1 | 2068 | Raj  |
| 3480 | Time/Date of caterpillar fungus collection | Harvesting | 1 | 2068 | Raj  |
| 3481 | Time/Date of caterpillar fungus collection | Harvesting | 1 | 2069 | Raj  |
| 3482 | Time/Date of caterpillar fungus collection | Harvesting | 1 | 2070 | Raj  |
| 3483 | Time/Date of caterpillar fungus collection | Harvesting | 1 | 2071 | Raj  |
| 3484 | Time/Date of caterpillar fungus collection | Harvesting | 1 | 2071 | Raj  |
| 3485 | Time/Date of caterpillar fungus collection | Harvesting | 1 | 2072 | Raj  |
| 3486 | Time/Date of caterpillar fungus collection | Harvesting | 1 | 2074 | Raj  |
| 3487 | Time/Date of caterpillar fungus collection | Harvesting | 1 | 2065 | Naya |
| 3488 | Time/Date of caterpillar fungus collection | Harvesting | 1 | 2065 | Naya |
| 3489 | Time/Date of caterpillar fungus collection | Harvesting | 1 | 2065 | Naya |
| 3490 | Time/Date of caterpillar fungus collection | Harvesting | 1 | 2067 | Naya |
| 3491 | Time/Date of caterpillar fungus collection | Harvesting | 1 | 2067 | Naya |
| 3492 | Time/Date of caterpillar fungus collection | Harvesting | 1 | 2067 | Naya |
| 3493 | Time/Date of caterpillar fungus collection | Harvesting | 1 | 2068 | Naya |
| 3494 | Time/Date of caterpillar fungus collection | Harvesting | 1 | 2069 | Naya |
| 3495 | Time/Date of caterpillar fungus collection | Harvesting | 1 | 2069 | Naya |
| 3496 | Time/Date of caterpillar fungus collection | Harvesting | 1 | 2070 | Naya |
| 3497 | Time/Date of caterpillar fungus collection | Harvesting | 1 | 2070 | Naya |
| 3498 | Time/Date of caterpillar fungus collection | Harvesting | 1 | 2072 | Naya |
| 3499 | Time/Date of caterpillar fungus collection | Harvesting | 1 | 2073 | Naya |

|      |                                            |            |   |      |      |
|------|--------------------------------------------|------------|---|------|------|
| 3500 | Time/Date of caterpillar fungus collection | Harvesting | 1 | 2074 | Naya |
| 3501 | Time/Date of caterpillar fungus collection | Harvesting | 1 | 2074 | Naya |
| 3502 | Time/Date of caterpillar fungus collection | Harvesting | 1 | 2074 | Naya |
| 3503 | Time/Date of caterpillar fungus collection | Harvesting | 1 | 2074 | Naya |
| 3504 | Time/Date of caterpillar fungus collection | Harvesting | 1 | 2067 | Nag  |
| 3505 | Time/Date of caterpillar fungus collection | Harvesting | 1 | 2068 | Nag  |
| 3506 | Time/Date of caterpillar fungus collection | Harvesting | 1 | 2068 | Nag  |
| 3507 | Time/Date of caterpillar fungus collection | Harvesting | 1 | 2068 | Nag  |
| 3508 | Time/Date of caterpillar fungus collection | Harvesting | 1 | 2070 | Nag  |
| 3509 | Time/Date of caterpillar fungus collection | Harvesting | 1 | 2070 | Nag  |
| 3510 | Time/Date of caterpillar fungus collection | Harvesting | 1 | 2070 | Nag  |
| 3511 | Time/Date of caterpillar fungus collection | Harvesting | 1 | 2070 | Nag  |
| 3512 | Time/Date of caterpillar fungus collection | Harvesting | 1 | 2071 | Nag  |
| 3513 | Time/Date of caterpillar fungus collection | Harvesting | 1 | 2071 | Nag  |
| 3514 | Time/Date of caterpillar fungus collection | Harvesting | 1 | 2073 | Nag  |
| 3515 | Time/Date of caterpillar fungus collection | Harvesting | 1 | 2073 | Nag  |
| 3516 | Time/Date of caterpillar fungus collection | Harvesting | 1 | 2073 | Nag  |
| 3517 | Time/Date of caterpillar fungus collection | Harvesting | 1 | 2073 | Nag  |
| 3518 | Time/Date of caterpillar fungus collection | Harvesting | 1 | 2070 | GKP  |
| 3519 | Time/Date of caterpillar fungus collection | Harvesting | 1 | 2070 | GKP  |
| 3520 | Time/Date of caterpillar fungus collection | Harvesting | 1 | 2071 | KP   |
| 3521 | Time/Date of caterpillar fungus collection | Harvesting | 1 | 2073 | Nag  |
| 3522 | Time/Date of caterpillar fungus collection | Harvesting | 1 | 2071 | Nag  |
| 3523 | Time/Date of caterpillar fungus collection | Harvesting | 1 | 2069 | Naya |
| 3524 | Time/Date of caterpillar fungus collection | Harvesting | 1 | 2072 | KP   |
| 3525 | Time/Date of caterpillar fungus collection | Harvesting | 1 | 2074 | AP   |
| 3526 | Time/Date of caterpillar fungus collection | Harvesting | 1 | 2073 | Naya |
| 3527 | Time/Date of caterpillar fungus collection | Harvesting | 1 | 2069 | Naya |
| 3528 | Time/Date of caterpillar fungus collection | Harvesting | 1 | 2068 | Naya |
| 3529 | Time/Date of caterpillar fungus collection | Harvesting | 1 | 2070 | KP   |
| 3530 | Time/Date of caterpillar fungus collection | Harvesting | 1 | 2067 | Naya |

|      |                                                           |            |   |      |      |
|------|-----------------------------------------------------------|------------|---|------|------|
| 3531 | Time/Date of caterpillar fungus collection                | Harvesting | 1 | 2067 | GKP  |
| 3532 | Time/Date of caterpillar fungus collection                | Harvesting | 1 | 2069 | Naya |
| 3533 | Time/Date of caterpillar fungus collection                | Harvesting | 1 | 2073 | Naya |
| 3534 | Time/Date of caterpillar fungus collection                | Harvesting | 1 | 2068 | GKP  |
| 3535 | Time/Date of caterpillar fungus collection                | Harvesting | 1 | 2067 | Naya |
| 3536 | Time/Date of caterpillar fungus collection                | Harvesting | 1 | 2066 | Naya |
| 3537 | Time/Date of caterpillar fungus collection                | Harvesting | 1 | 2073 | Raj  |
| 3538 | Time/Date of caterpillar fungus collection                | Harvesting | 1 | 2070 | GKP  |
| 3539 | Time/Date of caterpillar fungus collection                | Harvesting | 1 | 2069 | KP   |
| 3540 | Time/Date of caterpillar fungus collection                | Harvesting | 1 | 2071 | KP   |
| 3541 | Time/Date of caterpillar fungus collection                | Harvesting | 1 | 2074 | Nag  |
| 3542 | Time/Date of caterpillar fungus collection                | Harvesting | 1 | 2074 | Nag  |
| 3543 | Time/Date of caterpillar fungus collection                | Harvesting | 1 | 2074 | KP   |
| 3544 | Time/Date of caterpillar fungus collection                | Harvesting | 1 | 2074 | KP   |
| 3545 | Time/Date of caterpillar fungus collection                | Harvesting | 1 | 2068 | KP   |
| 3546 | Time/Date of caterpillar fungus collection                | Harvesting | 1 | 2069 | KP   |
| 3547 | Time/Date of caterpillar fungus collection                | Harvesting | 1 | 2069 | KP   |
| 3548 | Time/Date of caterpillar fungus collection                | Harvesting | 1 | 2071 | KP   |
| 3549 | Time/Date of caterpillar fungus collection                | Harvesting | 1 | 2072 | KP   |
| 3550 | Time/Date of caterpillar fungus collection                | Harvesting | 1 | 2073 | KP   |
| 3551 | Time/Date of caterpillar fungus collection                | Harvesting | 1 | 2074 | KP   |
| 3552 | Time/Date of caterpillar fungus collection                | Harvesting | 1 | 2076 | KP   |
| 3553 | Time/Date of caterpillar fungus collection                | Harvesting | 1 | 2076 | KP   |
| 3554 | Time/Date of caterpillar fungus collection                | Harvesting | 1 | 2076 | KP   |
| 3555 | Time/Date of caterpillar fungus collection                | Harvesting | 1 | 2077 | KP   |
| 3556 | Time/Date of caterpillar fungus collection                | Harvesting | 1 | 2078 | KP   |
| 3557 | Time/Date of caterpillar fungus collection                | Harvesting | 1 | 2076 | Naya |
| 3558 | Time/Date of caterpillar fungus collection                | Harvesting | 1 | 2078 | Ka   |
| 3559 | Trade of caterpillar fungus allowed after revenue payment | Trade      | 1 | 2070 | Ka   |
| 3560 | Trade of caterpillar fungus allowed after revenue payment | Trade      | 1 | 2065 | Raj  |
| 3561 | Trade port of caterpillar fungus closed due to earthquake | Trade      | 1 | 2066 | Raj  |

|      |                                                       |            |   |      |      |
|------|-------------------------------------------------------|------------|---|------|------|
| 3562 | Trade route from pasture to urban cities reported     | Trade      | 1 | 2067 | Raj  |
| 3563 | Traders collect entry permit (tax)                    | Trade      | 1 | 2070 | Naya |
| 3564 | Traders provide credits to harvesters for the journey | Trade      | 1 | 2074 | Naya |
| 3565 | Traders provide credits to harvesters for the journey | Trade      | 1 | 2074 | Naya |
| 3566 | Traders reach pastures to purchase caterpillar fungus | Trade      | 1 | 2070 | KP   |
| 3567 | Traders reach pastures to purchase caterpillar fungus | Trade      | 1 | 2070 | KP   |
| 3568 | Traders reach pastures to purchase caterpillar fungus | Trade      | 1 | 2067 | Nag  |
| 3569 | Traders reach pastures to purchase caterpillar fungus | Trade      | 1 | 2069 | Nag  |
| 3570 | Traders started paying tax                            | Trade      | 1 | 2070 | Nag  |
| 3571 | Traditional way to picking caterpillar fungus         | Harvesting | 1 | 2071 | Nag  |
| 3572 | Transboundary conflicts                               | Impacts    | 1 | 2071 | Nag  |
| 3573 | Transboundary conflicts                               | Impacts    | 1 | 2071 | Nag  |
| 3574 | Transboundary conflicts                               | Governance | 1 | 2068 | Ka   |
| 3575 | Transboundary harvesters from India                   | Harvesting | 1 | 2071 | Nag  |
| 3576 | Transboundary harvesters from Tibet                   | Harvesting | 1 | 2072 | Nag  |
| 3577 | Transboundary smugglers                               | Impacts    | 1 | 2068 | KP   |
| 3578 | Transboundary smugglers (Tibet)                       | Impacts    | 1 | 2068 | Raj  |
| 3579 | Transboundary trade of caterpillar fungus to Tibet    | Trade      | 1 | 2069 | Raj  |
| 3580 | Transboundary trade of caterpillar fungus to Tibet    | Trade      | 1 | 2069 | Naya |
| 3581 | Transboundary trade of caterpillar fungus to Tibet    | Trade      | 1 | 2069 | Naya |
| 3582 | Transboundary trade of caterpillar fungus to Tibet    | Trade      | 1 | 2074 | Ka   |
| 3583 | Transboundary trade of caterpillar fungus to Tibet    | Trade      | 1 | 2071 | Nag  |
| 3584 | Transboundary trade of caterpillar fungus to Tibet    | Trade      | 1 | 2067 | AP   |
| 3585 | Transboundary trade of caterpillar fungus to Tibet    | Trade      | 1 | 2066 | AP   |
| 3586 | Transboundary trade of caterpillar fungus to Tibet    | Trade      | 1 | 2073 | Nag  |
| 3587 | Transboundary trade of caterpillar fungus to Tibet    | Trade      | 1 | 2073 | Naya |
| 3588 | Transboundary trade of caterpillar fungus to Tibet    | Trade      | 1 | 2073 | GKP  |
| 3589 | Transboundary trade of caterpillar fungus to Tibet    | Trade      | 1 | 2072 | GKP  |
| 3590 | Transboundary trade of caterpillar fungus to Tibet    | Trade      | 1 | 2065 | AP   |
| 3591 | Transboundary trade of caterpillar fungus to Tibet    | Trade      | 1 | 2070 | GKP  |
| 3592 | Transboundary trade of caterpillar fungus to Tibet    | Trade      | 1 | 2073 | Naya |



|      |                                                                |            |   |      |      |
|------|----------------------------------------------------------------|------------|---|------|------|
| 3593 | Transboundary trade of caterpillar fungus to Tibet             | Trade      | 1 | 2069 | Naya |
| 3594 | Transboundary trade of caterpillar fungus to Tibet             | Trade      | 1 | 2069 | Naya |
| 3595 | Transboundary trade of caterpillar fungus to Tibet             | Trade      | 1 | 2069 | Raj  |
| 3596 | Transboundary trade of caterpillar fungus to Tibet             | Trade      | 1 | 2072 | KP   |
| 3597 | Unaccountable health workers (do not reach pasture)            | Governance | 1 | 2071 | Ka   |
| 3598 | Unauthorized collection of caterpillar fungus                  | Governance | 1 | 2071 | Ka   |
| 3599 | Unauthorized collection of caterpillar fungus                  | Governance | 1 | 2074 | Ka   |
| 3600 | Unauthorized collection of caterpillar fungus                  | Governance | 1 | 2065 | Raj  |
| 3601 | Unauthorized collection of caterpillar fungus                  | Governance | 1 | 2065 | KP   |
| 3602 | Unauthorized collection of caterpillar fungus                  | Governance | 1 | 2065 | KP   |
| 3603 | Unauthorized collection of caterpillar fungus                  | Governance | 1 | 2065 | KP   |
| 3604 | Unauthorized collection of caterpillar fungus                  | Governance | 1 | 2070 | KP   |
| 3605 | Unauthorized collection of caterpillar fungus                  | Governance | 1 | 2071 | Ka   |
| 3606 | Unauthorized collection of caterpillar fungus                  | Governance | 1 | 2077 | KP   |
| 3607 | Unauthorized collection of caterpillar fungus                  | Governance | 1 | 2077 | KP   |
| 3608 | Unauthorized collection of caterpillar fungus                  | Governance | 1 | 2077 | KP   |
| 3609 | Unauthorized collection of caterpillar fungus                  | Governance | 1 | 2077 | KP   |
| 3610 | Unauthorized collection of caterpillar fungus                  | Governance | 1 | 2077 | KP   |
| 3611 | Unauthorized collection of caterpillar fungus                  | Governance | 1 | 2077 | KP   |
| 3612 | Unauthorized collection of caterpillar fungus                  | Governance | 1 | 2078 | KP   |
| 3613 | Unauthorized collection of caterpillar fungus                  | Governance | 1 | 2078 | KP   |
| 3614 | Unauthorized collection of caterpillar fungus (without permit) | Governance | 1 | 2071 | KP   |
| 3615 | Unauthorized collection of caterpillar fungus (without permit) | Governance | 1 | 2069 | Naya |
| 3616 | Unauthorized collection of caterpillar fungus (without permit) | Governance | 1 | 2071 | KP   |
| 3617 | Unauthorized collection of caterpillar fungus (without permit) | Governance | 1 | 2078 | KP   |
| 3618 | Unauthorized collection of caterpillar fungus (without permit) | Governance | 1 | 2078 | KP   |
| 3619 | Unauthorized collection of caterpillar fungus (without permit) | Governance | 1 | 2078 | KP   |
| 3620 | Unauthorized collection of caterpillar fungus (without permit) | Governance | 1 | 2077 | NAG  |
| 3621 | Unauthorized collection of caterpillar fungus (without permit) | Governance | 1 | 2077 | NAG  |
| 3622 | Unauthorized collection of caterpillar fungus (without permit) | Governance | 1 | 2077 | NAG  |
| 3623 | Unauthorized collection of caterpillar fungus (without permit) | Governance | 1 | 2077 | NAG  |

|      |                                                                |             |   |      |      |
|------|----------------------------------------------------------------|-------------|---|------|------|
| 3624 | Unauthorized collection of caterpillar fungus (without permit) | Governance  | 1 | 2077 | NAG  |
| 3625 | Unauthorized collection of caterpillar fungus (without permit) | Governance  | 1 | 2078 | Nag  |
| 3626 | Unauthorized collection of caterpillar fungus (without permit) | Governance  | 1 | 2078 | Nag  |
| 3627 | Unauthorized collection of caterpillar fungus                  | Governance  | 1 | 2078 | Nag  |
| 3628 | Unauthorized collection of caterpillar fungus                  | Governance  | 1 | 2078 | Nag  |
| 3629 | Uncontrolled way of distributing permit                        | Governance  | 1 | 2071 | KP   |
| 3630 | Uncontrolled wildlife hunting                                  | Impacts     | 1 | 2073 | KP   |
| 3631 | Uncoordinated effort on revenue collection                     | Gap         | 1 | 2071 | AP   |
| 3632 | Unfair price paid to collectors                                | Trade       | 1 | 2065 | AP   |
| 3633 | Unfair price paid to collectors                                | Trade       | 1 | 2065 | AP   |
| 3634 | Unfair price paid to collectors                                | Trade       | 1 | 2066 | AP   |
| 3635 | Unfair price paid to collectors                                | Trade       | 1 | 2069 | AP   |
| 3636 | Unfair price paid to collectors                                | Trade       | 1 | 2069 | AP   |
| 3637 | Unfair price paid to collectors                                | Trade       | 1 | 2074 | AP   |
| 3638 | Unfair price paid to collectors                                | Trade       | 1 | 2066 | GKP  |
| 3639 | Unfair price paid to collectors                                | Trade       | 1 | 2068 | Raj  |
| 3640 | Unfair price paid to collectors                                | Trade       | 1 | 2071 | Nag  |
| 3641 | Unfair price paid to collectors                                | Trade       | 1 | 2071 | Nag  |
| 3642 | Unfair price paid to collectors                                | Trade       | 1 | 2073 | Nag  |
| 3643 | Unfair price paid to collectors                                | Trade       | 1 | 2071 | KP   |
| 3644 | Unfair price paid to collectors                                | Trade       | 1 | 2072 | KP   |
| 3645 | Unfair price paid to collectors                                | Trade       | 1 | 2070 | Naya |
| 3646 | Unfair price paid to collectors                                | Trade       | 1 | 2066 | Raj  |
| 3647 | Unfair price paid to collectors                                | Trade       | 1 | 2068 | Raj  |
| 3648 | Unfair price paid to collectors                                | Trade       | 1 | 2065 | Naya |
| 3649 | Unfair price paid to collectors                                | Trade       | 1 | 2068 | Naya |
| 3650 | Unfair price paid to collectors                                | Trade       | 1 | 2071 | Nag  |
| 3651 | Unfair price paid to collectors                                | Trade       | 1 | 2077 | NAG  |
| 3652 | Units of caterpillar fungus in per kg (1kg=7k pieces)          | Information | 1 | 2069 | Nag  |
| 3653 | Unmanaged collection of revenue at local level                 | Governance  | 1 | 2072 | Nag  |
| 3654 | Unmanaged collectors in the pastures                           | Governance  | 1 | 2073 | Nag  |

|      |                                                |            |   |      |      |
|------|------------------------------------------------|------------|---|------|------|
| 3655 | Unmanaged solid waste in the pasture           | Governance | 1 | 2072 | KP   |
| 3656 | Unmanaged solid waste in the pasture           | Governance | 1 | 2071 | KP   |
| 3657 | Unmanaged solid waste in the pasture           | Governance | 1 | 2073 | Ka   |
| 3658 | Unmanaged solid waste in the pasture           | Governance | 1 | 2074 | Naya |
| 3659 | Unmanaged solid waste in the pasture           | Governance | 1 | 2073 | Nag  |
| 3660 | Unmanaged solid waste in the pasture           | Governance | 1 | 2074 | KP   |
| 3661 | Unmanaged solid waste in the pasture           | Governance | 1 | 2070 | Nag  |
| 3662 | Unmanaged solid waste in the pasture           | Governance | 1 | 2066 | AP   |
| 3663 | Unmanaged solid waste in the pasture           | Governance | 1 | 2068 | Raj  |
| 3664 | Unmanaged solid waste in the pasture           | Governance | 1 | 2077 | NAG  |
| 3665 | Unmanaged solid waste in the pasture           | Governance | 1 | 2078 | KP   |
| 3666 | Unmanaged way of settling in the pastures      | Governance | 1 | 2071 | KP   |
| 3667 | Unrecorded harvesters deaths                   | Governance | 1 | 2073 | Nag  |
| 3668 | Unrecorded harvesters in the pastures          | Governance | 1 | 2070 | Nag  |
| 3669 | Unrecorded harvesters in the pastures          | Governance | 1 | 2066 | AP   |
| 3670 | Unrecorded harvesters in the pastures          | Governance | 1 | 2066 | AP   |
| 3671 | Unrecorded harvesters in the pastures          | Governance | 1 | 2073 | Nag  |
| 3672 | Unreliable local agents for trade              | Trade      | 1 | 2073 | Nag  |
| 3673 | Unsustainable collection of caterpillar fungus | Impacts    | 1 | 2071 | Nag  |
| 3674 | Unsustainable collection of caterpillar fungus | Impacts    | 1 | 2074 | GKP  |
| 3675 | Unsustainable collection of caterpillar fungus | Impacts    | 1 | 2067 | AP   |
| 3676 | Unsustainable collection of caterpillar fungus | Impacts    | 1 | 2074 | Raj  |
| 3677 | Unsustainable collection of caterpillar fungus | Impacts    | 1 | 2073 | Ka   |
| 3678 | Unsustainable collection of caterpillar fungus | Impacts    | 1 | 2066 | AP   |
| 3679 | Unsustainable collection of caterpillar fungus | Impacts    | 1 | 2065 | Raj  |
| 3680 | Unsustainable collection of caterpillar fungus | Impacts    | 1 | 2069 | Naya |
| 3681 | Unsustainable collection of caterpillar fungus | Impacts    | 1 | 2074 | Naya |
| 3682 | Unsustainable collection of caterpillar fungus | Impacts    | 1 | 2068 | Raj  |
| 3683 | Unsustainable collection of caterpillar fungus | Impacts    | 1 | 2070 | KP   |
| 3684 | Unsustainable collection of caterpillar fungus | Impacts    | 1 | 2074 | Naya |
| 3685 | Unsustainable collection of caterpillar fungus | Impacts    | 1 | 2074 | Naya |

|      |                                                                 |            |   |      |      |
|------|-----------------------------------------------------------------|------------|---|------|------|
| 3686 | Unsustainable collection of caterpillar fungus                  | Impacts    | 1 | 2074 | Naya |
| 3687 | Unsustainable collection of caterpillar fungus                  | Impacts    | 1 | 2071 | Nag  |
| 3688 | Unsustainable collection of caterpillar fungus                  | Impacts    | 1 | 2071 | Nag  |
| 3689 | Unsustainable collection of caterpillar fungus                  | Impacts    | 1 | 2071 | Nag  |
| 3690 | Unsustainable collection of caterpillar fungus                  | Impacts    | 1 | 2073 | Nag  |
| 3691 | Unsustainable collection of caterpillar fungus                  | Impacts    | 1 | 2066 | GKP  |
| 3692 | Unsustainable collection of caterpillar fungus                  | Impacts    | 1 | 2074 | KP   |
| 3693 | Unsustainable collection of caterpillar fungus                  | Impacts    | 1 | 2071 | Nag  |
| 3694 | Unsustainable collection of caterpillar fungus                  | Impacts    | 1 | 2071 | KP   |
| 3695 | Unsystematic way of recording number of permit issued           | Governance | 1 | 2070 | GKP  |
| 3696 | Use of excess alcohol in the pastures (conflict)                | Impacts    | 1 | 2071 | KP   |
| 3697 | Use of helicopter to transport caterpillar fungus               | Trade      | 1 | 2070 | KP   |
| 3698 | Use of helicopter to transport caterpillar fungus               | Trade      | 1 | 2070 | Ka   |
| 3699 | Use of helicopter to transport caterpillar fungus               | Trade      | 1 | 2071 | Ka   |
| 3700 | Use of helicopter to transport caterpillar fungus               | Trade      | 1 | 2069 | Raj  |
| 3701 | Use of helicopter to transport caterpillar fungus               | Trade      | 1 | 2071 | KP   |
| 3702 | Use of helicopter to transport caterpillar fungus               | Trade      | 1 | 2071 | KP   |
| 3703 | Use of helicopter to transport caterpillar fungus               | Trade      | 1 | 2071 | Nag  |
| 3704 | Use of helicopter to transport caterpillar fungus               | Trade      | 1 | 2072 | Nag  |
| 3705 | Use of traditional instrument to collect the caterpillar fungus | Harvesting | 1 | 2072 | KP   |
| 3706 | Value addition of caterpillar fungus                            | Trade      | 1 | 2065 | Raj  |
| 3707 | Value addition of caterpillar fungus                            | Trade      | 1 | 2066 | Raj  |
| 3708 | Value addition of caterpillar fungus                            | Trade      | 1 | 2067 | Raj  |
| 3709 | Value addition of caterpillar fungus                            | Trade      | 1 | 2068 | Raj  |
| 3710 | Value addition of caterpillar fungus                            | Trade      | 1 | 2069 | Raj  |
| 3711 | Value addition of caterpillar fungus (and other herbs)          | Trade      | 1 | 2072 | Nag  |
| 3712 | Value additon of caterpillar fungus                             | Trade      | 1 | 2065 | AP   |
| 3713 | Value additon of caterpillar fungus                             | Trade      | 1 | 2065 | AP   |
| 3714 | Value additon of caterpillar fungus                             | Trade      | 1 | 2065 | AP   |
| 3715 | Value additon of caterpillar fungus                             | Trade      | 1 | 2065 | AP   |
| 3716 | Value of Chinese currency increased at International market     | Trade      | 1 | 2069 | KP   |

|      |                                                        |            |   |      |      |
|------|--------------------------------------------------------|------------|---|------|------|
| 3717 | Vulnerable harvesters                                  | Challenges | 1 | 2071 | KP   |
| 3718 | Vulnerable harvesters                                  | Challenges | 1 | 2066 | AP   |
| 3719 | Vulnerable harvesters                                  | Challenges | 1 | 2068 | Raj  |
| 3720 | Vulnerable harvesters                                  | Challenges | 1 | 2071 | Ka   |
| 3721 | Vulnerable harvesters                                  | Challenges | 1 | 2071 | Ka   |
| 3722 | Vulnerable harvesters                                  | Challenges | 1 | 2066 | AP   |
| 3723 | Vulnerable harvesters                                  | Challenges | 1 | 2071 | AP   |
| 3724 | Vulnerable harvesters                                  | Challenges | 1 | 2066 | Naya |
| 3725 | Vulnerable harvesters                                  | Challenges | 1 | 2074 | Naya |
| 3726 | Vulnerable harvesters                                  | Challenges | 1 | 2070 | Nag  |
| 3727 | Vulnerable harvesters                                  | Challenges | 1 | 2071 | Nag  |
| 3728 | Vulnerable harvesters                                  | Challenges | 1 | 2077 | NAG  |
| 3729 | Vulnerable harvesters                                  | Challenges | 1 | 2077 | NAG  |
| 3730 | Vulnerable harvesters                                  | Challenges | 1 | 2077 | NAG  |
| 3731 | Vulnerable harvesters                                  | Challenges | 1 | 2071 | Raj  |
| 3732 | Vulnerable harvesters                                  | Challenges | 1 | 2070 | Raj  |
| 3733 | Vulnerable harvesters                                  | Challenges | 1 | 2068 | KP   |
| 3734 | Vulnerable harvesters                                  | Challenges | 1 | 2071 | KP   |
| 3735 | Vulnerable harvesters                                  | Challenges | 1 | 2071 | KP   |
| 3736 | Vulnerable harvesters                                  | Challenges | 1 | 2071 | KP   |
| 3737 | Vulnerable harvesters                                  | Challenges | 1 | 2074 | KP   |
| 3738 | Vulnerable harvesters                                  | Challenges | 1 | 2071 | Nag  |
| 3739 | Vulnerable harvesters                                  | Challenges | 1 | 2073 | Nag  |
| 3740 | Vulnerable harvesters                                  | Challenges | 1 | 2073 | Nag  |
| 3741 | Vulnerable harvesters                                  | Challenges | 1 | 2073 | Nag  |
| 3742 | Vulnerable harvesters                                  | Challenges | 1 | 2072 | Nag  |
| 3743 | Vulnerable harvesters (harsh environmental conditions) | Challenges | 1 | 2077 | NAG  |
| 3744 | Vulnerable harvesters (harsh environmental conditions) | Challenges | 1 | 2065 | AP   |
| 3745 | Vulnerable harvesters (harsh environmental conditions) | Challenges | 1 | 2071 | KP   |
| 3746 | Vulnerable harvesters (harsh environmental conditions) | Challenges | 1 | 2077 | NAG  |
| 3747 | Vulnerable harvesters (harsh environmental conditions) | Challenges | 1 | 2078 | KP   |

|      |                                                                              |             |   |      |      |
|------|------------------------------------------------------------------------------|-------------|---|------|------|
| 3748 | Vulnerable harvesters (harsh environmental conditions)                       | Challenges  | 1 | 2078 | Naya |
| 3749 | Vulnerable harvesters (harsh environmental conditions)                       | Challenges  | 1 | 2077 | RAJ  |
| 3750 | Vulnerable harvesters (harsh environmental conditions)                       | Challenges  | 1 | 2078 | Ka   |
| 3751 | Vulnerable harvesters                                                        | Challenges  | 1 | 2076 | Ka   |
| 3752 | Vulnerable harvesters                                                        | Challenges  | 1 | 2076 | Ka   |
| 3753 | Vulnerbale harvesters                                                        | Challenges  | 1 | 2068 | Raj  |
| 3754 | Waged based labour hired to pick caterpillar fungus                          | Harvesting  | 1 | 2069 | Naya |
| 3755 | Walking duration to pastures                                                 | Harvesting  | 1 | 2071 | Nag  |
| 3756 | Walking duration to pastures                                                 | Harvesting  | 1 | 2071 | Nag  |
| 3757 | Warnings on consumptions of caterpillar fungus found in low altitude         | Information | 1 | 2065 | KP   |
| 3758 | Weak communications systems in the pastures                                  | Challenges  | 1 | 2067 | GKP  |
| 3759 | Weak communications systems in the pastures                                  | Challenges  | 1 | 2068 | GKP  |
| 3760 | Weak communications systems in the pastures                                  | Challenges  | 1 | 2074 | KP   |
| 3761 | Weak communications systems in the pastures                                  | Challenges  | 1 | 2068 | Nag  |
| 3762 | Weak institutional mechnism to curb illegal summugling of caterpillar fungus | Gap         | 1 | 2065 | AP   |
| 3763 | Weak institutional mechnism to curb illegal summugling of caterpillar fungus | Gap         | 1 | 2066 | AP   |
| 3764 | Weak institutional mechnism to curb illegal summugling of caterpillar fungus | Gap         | 1 | 2066 | AP   |
| 3765 | Weak institutional mechnism to curb illegal summugling of caterpillar fungus | Gap         | 1 | 2069 | AP   |
| 3766 | Weapons in the pastures                                                      | Impacts     | 1 | 2068 | Naya |
| 3767 | Wildlife impacted due to overcrowded harvesters                              | Impacts     | 1 | 2069 | KP   |
| 3768 | Wildlife killings during caterpillar fungus collection                       | Impacts     | 1 | 2073 | KP   |
| 3769 | Wildlife killings during caterpillar fungus collection                       | Impacts     | 1 | 2071 | Nag  |
| 3770 | Wildlife killings during caterpillar fungus collection                       | Impacts     | 1 | 2071 | Nag  |
| 3771 | Wildlife killings during caterpillar fungus collection                       | Impacts     | 1 | 2073 | KP   |
| 3772 | Wildlife killings during caterpillar fungus collection                       | Impacts     | 1 | 2069 | KP   |
| 3773 | Wildlife killings during caterpillar fungus collection                       | Impacts     | 1 | 2073 | KP   |

|      |                                                                  |            |   |      |     |
|------|------------------------------------------------------------------|------------|---|------|-----|
| 3774 | Youths not able to harness benefits of caterpillar fungus income | Harvesting | 1 | 2068 | Raj |
| 3775 | Youths study the pastures                                        | Impacts    | 1 | 2074 | KP  |
| 3776 | Youths study the pastures                                        | Impacts    | 1 | 2077 | NAG |
| 3777 | Youths study the pastures                                        | Impacts    | 1 | 2077 | NAG |
