# Supplementary material for: Communicating conservation: how do the Nepalese print media portray caterpillar fungus? An analysis of newspaper coverage from 2008–2021
Source: PubMed Central journal article supplement — Heliyon. 2022 Aug 27;8(9):e10439. doi: 10.1016/j.heliyon.2022.e10439 (PMC9437801; doi:10.1016/j.heliyon.2022.e10439), 2022-08-27
Supplement: mmc4.pdf [file mmc4.pdf]

| <b>Supplementary Material D: Quotation from Newspapers</b> |                                                  |                                                                      |                                                                                                                                                                                                                                                                 |                  |                     |
|------------------------------------------------------------|--------------------------------------------------|----------------------------------------------------------------------|-----------------------------------------------------------------------------------------------------------------------------------------------------------------------------------------------------------------------------------------------------------------|------------------|---------------------|
| <b>Theme</b>                                               | <b>Sub-theme</b>                                 | <b>Keywords/Phrase [unprocessed]</b>                                 | <b>Examples/Quotation</b>                                                                                                                                                                                                                                       | <b>Newspaper</b> | <b>English Date</b> |
| <b>a) Reporting of harvesting of caterpillar fungus</b>    |                                                  |                                                                      |                                                                                                                                                                                                                                                                 |                  |                     |
|                                                            | Harvester's demography and impact on institution | School closure, students and teachers' harvesters, Empty villages    | "If somebody gets ill in the village during harvesting season, there is no one to take care for elderly, villages are empty. Even children have gone for caterpillar fungus harvesting " Sonam Waiju Lama                                                       | Kantipur         | 5/30/2014           |
|                                                            | Technology and technique used                    | Methods of harvesting                                                | "Some harvesters swipe the grounds like sweeping, and even some do not use traditional tools such as Kuto" Jhaka Buda one of the harvesters. "Harvesters do not have knowledge on picking the caterpillar fungus" Tirtha Bahadur Shrestha, Environmental expert | Nagarik          | 6/17/2014           |
|                                                            | Temporal dynamics of harvesters' number          | Overcrowded harvesters                                               | "This year from end of March till mid of May 40 thousand harvesters have taken collection permit to enter Saipal pastures" Dharma Jung Bahadur Singh, President Bajhang herbs stakeholder association                                                           | Annapurna Post   | 5/19/2008           |
| <b>b) Reporting of trade of caterpillar fungus</b>         |                                                  |                                                                      |                                                                                                                                                                                                                                                                 |                  |                     |
|                                                            | Illegal trade                                    | Illegal smuggling of caterpillar fungus to China, Smugglers arrested | "As per the data, yearly one quintal of caterpillar fungus is smuggled hidden inside the vehicle engines" Tatopaani customs officials of Nepal                                                                                                                  | Nagarik          | 4/29/2012           |

|                                                                     |                            |                                                                                                 |                                                                                                                                                                                                                                                                                                |          |           |
|---------------------------------------------------------------------|----------------------------|-------------------------------------------------------------------------------------------------|------------------------------------------------------------------------------------------------------------------------------------------------------------------------------------------------------------------------------------------------------------------------------------------------|----------|-----------|
|                                                                     | Temporal dynamics of price | Per piece price increased than last year                                                        | "Previous year per piece of caterpillar fungus was traded on 150 Nepalese rupees, this year per piece has raised to triple times i.e. 800-1000 NPR per piece" Bishu Bohara, Chainpur VDC, Mayana                                                                                               | Kantipur | 7/29/2012 |
| <b>c) Reporting on the impacts of caterpillar fungus harvesting</b> |                            |                                                                                                 |                                                                                                                                                                                                                                                                                                |          |           |
|                                                                     | Ecological                 | Overcrowded pastures, Less availability of caterpillar fungus                                   | "Last decade less harvesters were in the pastures, now it is overcrowded" District forest officer, Ramesh Chand.                                                                                                                                                                               | Nagarik  | 6/17/2014 |
|                                                                     | Ecological                 | Overcrowded pastures, Less availability of caterpillar fungus, Indebted harvesters              | "There is no income as previous year. Per person estimated cost to reach pasture including revenue and food reaches 25000 Nepalese rupees. I am surprised this year. Harvesters could only pick 40-45 pieces of caterpillar fungus" Narendra B.K.                                              | Kantipur | 7/30/2015 |
|                                                                     | Economic                   | Main source of income, High dependency on caterpillar fungus, Improved livelihoods              | "My household has 6 members, we earned 1.4 million this year, I plan to buy land in Tulsipur" Dalchan Buda, Rukum                                                                                                                                                                              | Kantipur | 7/28/2013 |
|                                                                     | Socio-economic             | Less income from caterpillar fungus due decreasing production, Return to traditional profession | "In previous years we used to earn at least 0.4-0.5 million Nepalese rupees. That used to suffice for a family of 5 members. With less production and less price of caterpillar fungus I have returned to house building profession. We do not find caterpillar fungus as before" Katak Jethar | Kantipur | 8/4/2016  |
|                                                                     |                            |                                                                                                 |                                                                                                                                                                                                                                                                                                |          |           |

| <b>d) Reporting of governance mechanism</b> |                               |                                                                              |                                                                                                                                                                                                                                                                                                                                                                                     |              |          |
|---------------------------------------------|-------------------------------|------------------------------------------------------------------------------|-------------------------------------------------------------------------------------------------------------------------------------------------------------------------------------------------------------------------------------------------------------------------------------------------------------------------------------------------------------------------------------|--------------|----------|
|                                             | Amount of revenue             | Revenue collection from the harvesters                                       | "This year around 10 million entry fees are collected from the harvesters" Mugu Village development committee                                                                                                                                                                                                                                                                       | Karobar      | 6/2/2014 |
|                                             | Local management              | Identity cards mandatory for the harvesters                                  | " The process of issuing identity cards to harvesters will be implemented quickly " Bishwonath Oli, Secretary, Ministry of Forest and Environment                                                                                                                                                                                                                                   | Kantipur     | 4/9/2015 |
|                                             | Revenue                       | Mismatch of caterpillar fungus export and revenue collected                  | " Even though records show exports of around 40 million from Kum district, the ratio of revenue is less. Data suggests that more 150 kg of caterpillar fungus is traded to China from district level. Previous year 65 kg of caterpillar fungus was traded on 1 million per kg, that means 6.5 million revenue has been collection " Sher Bahadur Pariyar, District forest official | Naya Patrika | 6/1/2016 |
| <b>e) Reporting of policy gaps</b>          |                               |                                                                              |                                                                                                                                                                                                                                                                                                                                                                                     |              |          |
|                                             | Data gap                      | No data with state on volume collection and production of caterpillar fungus | "We do not know the exact amount of caterpillar fungus production. Since the pasture is at remote places, we are not able to reach and monitor the amount" Jaishwal, Forest officer                                                                                                                                                                                                 | Nagarik      | 6/9/2016 |
|                                             | Operational and Institutional | Absence of state monitoring during the collection season                     | "If state could install customs or security arrangements in the major two ports, illegal trade would reduce to minimum" Ram Bidari Thakur, District Forest officer , Dolpa                                                                                                                                                                                                          | Nagarik      | 6/9/2016 |

|                                               |                                |                                                                                                                                                               |                                                                                                                                                                                                                                                                                                                               |          |           |
|-----------------------------------------------|--------------------------------|---------------------------------------------------------------------------------------------------------------------------------------------------------------|-------------------------------------------------------------------------------------------------------------------------------------------------------------------------------------------------------------------------------------------------------------------------------------------------------------------------------|----------|-----------|
|                                               | Research                       | Need to study market of caterpillar fungus and its scientific management, exchange of caterpillar fungus management options of China, India, Bhutan and Nepal | "Meeting will assess the status of the caterpillar fungus, its international market along with scientific management will be discussed " Yam Bahadur Thapa Director General Department of Plant resources                                                                                                                     | Kantipur | 3/3/2014  |
| <b>f) Reporting of government initiatives</b> |                                |                                                                                                                                                               |                                                                                                                                                                                                                                                                                                                               |          |           |
|                                               | Conservation initiative        | Interest of state in biodiversity and medicinal plants conservation                                                                                           | " In interest of biodiversity conservation Ministry of forest and environment has drafted a bill that will be soon translated into act in which I will support till act is drafted " Speaker Onsari Gharti Magar                                                                                                              | Rajdhani | 5/23/2016 |
|                                               | Mobilization of security force | Increased security arranging check post                                                                                                                       | " In previous years harvesters possessed sharp weapons and organized loots in the pastures hence more than 30 police are now on duty " Govinda Bhattarai, Nepal Police                                                                                                                                                        | Kantipur | 5/27/2012 |
|                                               | Research initiative            | State initiation to manage Caterpillar fungus harvesting and collection                                                                                       | " To collect caterpillar fungus huge number of harvester's flow in, deforest land, pick up other valuable medicinal herbs if caterpillar fungus is not available during the season. To tackle these issues, we are planning to draft action plans" Bijayraj Poudel, Joint Secretary, Ministry of forest and soil conservation | Karobar  | 6/5/2012  |
